# Supplementary material
Source: MDPI journal article supplement (https://www.mdpi.com/2624-8549/3/3/52)
Supplement: s1 [file s1]

Archive with 3 entries (3 files):
- p12063_fin.cif
- p12063_fin_checkcif.pdf
- supplement.pdf
