# Supplementary material
Source: MDPI journal article supplement (https://www.mdpi.com/2624-8549/3/3/52)
Supplement: s1 [file s1 › p12063_fin.cif]

 
data_p12063
 
_audit_creation_method            'SHELXL-2018/3'
_shelx_SHELXL_version_number      '2018/3'
_chemical_name_systematic         ?
_chemical_name_common             
'Newansa-1-NMe2'
_chemical_melting_point           ?
_chemical_formula_moiety         
 'C45 H62 N4 O15, C H Cl3' 
_chemical_formula_sum
 'C46 H63 Cl3 N4 O15' 
_chemical_formula_weight          1018.35

loop_
 _atom_type_symbol
 _atom_type_description
 _atom_type_scat_dispersion_real
 _atom_type_scat_dispersion_imag
 _atom_type_scat_source
 'C'  'C'   0.0181   0.0091
 'International Tables Vol C Tables 4.2.6.8 and 6.1.1.4'
 'H'  'H'   0.0000   0.0000
 'International Tables Vol C Tables 4.2.6.8 and 6.1.1.4'
 'N'  'N'   0.0311   0.0180
 'International Tables Vol C Tables 4.2.6.8 and 6.1.1.4'
 'O'  'O'   0.0492   0.0322
 'International Tables Vol C Tables 4.2.6.8 and 6.1.1.4'
 'Cl'  'Cl'   0.3639   0.7018
 'International Tables Vol C Tables 4.2.6.8 and 6.1.1.4'
 
_space_group_crystal_system       orthorhombic
_space_group_IT_number            19
_space_group_name_H-M_alt         'P 21 21 21'
_space_group_name_Hall            'P 2ac 2ab'
 
_shelx_space_group_comment
;
The symmetry employed for this shelxl refinement is uniquely defined
by the following loop, which should always be used as a source of
symmetry information in preference to the above space-group names.
They are only intended as comments.
;
 
loop_
 _space_group_symop_operation_xyz
 'x, y, z'
 '-x+1/2, -y, z+1/2'
 '-x, y+1/2, -z+1/2'
 'x+1/2, -y+1/2, -z'
 
_cell_length_a                    14.4057(4)
_cell_length_b                    14.9409(3)
_cell_length_c                    22.8735(7)
_cell_angle_alpha                 90
_cell_angle_beta                  90
_cell_angle_gamma                 90
_cell_volume                      4923.2(2)
_cell_formula_units_Z             4
_cell_measurement_temperature     100(1)
_cell_measurement_reflns_used     12604
_cell_measurement_theta_min       3.5305
_cell_measurement_theta_max       76.1948
 
_exptl_crystal_description        plate
_exptl_crystal_colour             Colourless
_exptl_crystal_density_meas       ?
_exptl_crystal_density_method     ?
_exptl_crystal_density_diffrn     1.374          
_exptl_crystal_F_000              2152
_exptl_transmission_factor_min    ?
_exptl_transmission_factor_max    ?
_exptl_crystal_size_max           0.250
_exptl_crystal_size_mid           0.200
_exptl_crystal_size_min           0.070
_exptl_absorpt_coefficient_mu     2.287
_shelx_estimated_absorpt_T_min    0.599
_shelx_estimated_absorpt_T_max    0.856
_exptl_absorpt_correction_T_min   0.74786
_exptl_absorpt_correction_T_max   1.00000
_exptl_absorpt_correction_type    'multi-scan'
_exptl_absorpt_process_details
;
CrysAlisPro, Agilent Technologies,
Version 1.171.35.19 (release 27-10-2011 CrysAlis171 .NET)
(compiled Oct 27 2011,15:02:11)
Empirical absorption correction using spherical harmonics, 
implemented in SCALE3 ABSPACK scaling algorithm.
;
_diffrn_ambient_temperature       100(1)
_diffrn_radiation_wavelength      1.54178
_diffrn_radiation_type            CuK\a
_diffrn_source                    'fine-focus sealed X-ray tube'
_diffrn_radiation_source          'SuperNova (Cu) X-ray Source'
_diffrn_radiation_monochromator   'mirror'
_diffrn_measurement_device_type   'SuperNova, Dual, Cu at zero, Atlas'
_diffrn_detector_area_resol_mean  10.5598
_diffrn_measurement_method        '\w scans' 
_diffrn_reflns_number             26683
_diffrn_reflns_av_unetI/netI      0.0484
_diffrn_reflns_av_R_equivalents   0.0406
_diffrn_reflns_limit_h_min        -17
_diffrn_reflns_limit_h_max        17
_diffrn_reflns_limit_k_min        -18
_diffrn_reflns_limit_k_max        15
_diffrn_reflns_limit_l_min        -26
_diffrn_reflns_limit_l_max        28
_diffrn_reflns_theta_min          3.533
_diffrn_reflns_theta_max          74.480
_diffrn_reflns_theta_full         67.679
_diffrn_measured_fraction_theta_max   0.999
_diffrn_measured_fraction_theta_full  1.000
_diffrn_reflns_Laue_measured_fraction_max    0.999
_diffrn_reflns_Laue_measured_fraction_full   1.000
_diffrn_reflns_point_group_measured_fraction_max   0.999
_diffrn_reflns_point_group_measured_fraction_full  0.999
_reflns_number_total              10050
_reflns_number_gt                 9228
_reflns_threshold_expression      'I > 2\s(I)'
_reflns_Friedel_coverage          0.810
_reflns_Friedel_fraction_max      0.998
_reflns_Friedel_fraction_full     0.999
 
_reflns_special_details
;
 Reflections were merged by SHELXL according to the crystal
 class for the calculation of statistics and refinement.
 
 _reflns_Friedel_fraction is defined as the number of unique
 Friedel pairs measured divided by the number that would be
 possible theoretically, ignoring centric projections and
 systematic absences.
;
 
_computing_data_collection     'CrysAlisPro 1.171.35.19 (Rigaku OD, 2011)'
_computing_cell_refinement     'CrysAlisPro 1.171.35.19 (Rigaku OD, 2011)'
_computing_data_reduction      'CrysAlisPro 1.171.35.19 (Rigaku OD, 2011)'
_computing_structure_solution   'SHELXT-2018/2 (Sheldrick, 2015)'
_computing_structure_refinement 'SHELXL-2018/3 (Sheldrick, 2015)'
_computing_publication_material   
;
SHELXTL (Sheldrick, 2001), <i>Mercury CSD 2.0</i> (Macrae <i>et al</i>., 2008)
<i>publCIF</i> (Westrip, 2010)
; 
_refine_special_details           ?
_refine_ls_structure_factor_coef  Fsqd
_refine_ls_matrix_type            full
_refine_ls_weighting_scheme       calc
_refine_ls_weighting_details
'w=1/[\s^2^(Fo^2^)+(0.0565P)^2^+2.2000P] where P=(Fo^2^+2Fc^2^)/3'
_atom_sites_solution_primary      ?
_atom_sites_solution_secondary    ?
_atom_sites_solution_hydrogens    mixed
_refine_ls_hydrogen_treatment     mixed
_refine_ls_extinction_method      none
_refine_ls_extinction_coef        .
_refine_ls_abs_structure_details
;
 Flack x determined using 3814 quotients [(I+)-(I-)]/[(I+)+(I-)]
 (Parsons, Flack and Wagner, Acta Cryst. B69 (2013) 249-259).
;
_refine_ls_abs_structure_Flack    -0.009(9)
_chemical_absolute_configuration  ad
_refine_ls_number_reflns          10050
_refine_ls_number_parameters      650
_refine_ls_number_restraints      0
_refine_ls_R_factor_all           0.0478
_refine_ls_R_factor_gt            0.0422
_refine_ls_wR_factor_ref          0.1135
_refine_ls_wR_factor_gt           0.1089
_refine_ls_goodness_of_fit_ref    1.030
_refine_ls_restrained_S_all       1.030
_refine_ls_shift/su_max           0.001
_refine_ls_shift/su_mean          0.000
 
loop_
 _atom_site_label
 _atom_site_type_symbol
 _atom_site_fract_x
 _atom_site_fract_y
 _atom_site_fract_z
 _atom_site_U_iso_or_equiv
 _atom_site_adp_type
 _atom_site_occupancy
 _atom_site_site_symmetry_order  
 _atom_site_calc_flag
 _atom_site_refinement_flags_posn
 _atom_site_refinement_flags_adp
 _atom_site_refinement_flags_occupancy
 _atom_site_disorder_assembly
 _atom_site_disorder_group
O1 O 0.38519(16) 0.43903(15) 0.42519(10) 0.0232(5) Uani 1 1 d . . . . .
H1A H 0.356(5) 0.417(5) 0.460(3) 0.08(2) Uiso 1 1 d . . . . .
O2 O 0.27614(18) 0.40897(17) 0.50420(11) 0.0288(5) Uani 1 1 d . . . . .
O3 O 0.00937(17) 0.58748(18) 0.53024(11) 0.0273(5) Uani 1 1 d . . . . .
O4 O 0.03164(16) 0.75313(16) 0.41993(11) 0.0258(5) Uani 1 1 d . . . . .
O5 O -0.11622(16) 0.64345(17) 0.47720(11) 0.0258(5) Uani 1 1 d . . . . .
O6 O -0.13009(17) 0.42111(16) 0.33235(12) 0.0284(5) Uani 1 1 d . . . . .
O7 O 0.01335(17) 0.54178(16) 0.23729(11) 0.0249(5) Uani 1 1 d . . . . .
O8 O -0.1139(2) 0.4866(2) 0.19252(14) 0.0443(7) Uani 1 1 d . . . . .
O9 O 0.05635(17) 0.33130(18) 0.17378(12) 0.0280(5) Uani 1 1 d . . . . .
H9 H 0.048(4) 0.321(4) 0.143(3) 0.043(15) Uiso 1 1 d . . . . .
O10 O 0.19229(19) 0.20937(17) 0.19303(11) 0.0263(5) Uani 1 1 d . . . . .
H10 H 0.144(4) 0.229(4) 0.195(3) 0.044(15) Uiso 1 1 d . . . . .
O11 O 0.42176(17) 0.61227(15) 0.24715(11) 0.0251(5) Uani 1 1 d . . . . .
O12 O 0.30311(16) 0.30748(17) 0.33095(11) 0.0255(5) Uani 1 1 d . . . . .
O13 O 0.40868(17) 0.23111(16) 0.38513(10) 0.0233(5) Uani 1 1 d . . . . .
O14 O 0.58960(17) 0.37354(16) 0.38063(11) 0.0261(5) Uani 1 1 d . . . . .
O15 O 0.67649(17) 0.25019(16) 0.35747(11) 0.0265(5) Uani 1 1 d . . . . .
N1 N 0.43474(18) 0.52378(17) 0.32748(12) 0.0185(5) Uani 1 1 d . . . . .
H1B H 0.462(4) 0.477(3) 0.345(2) 0.034(12) Uiso 1 1 d . . . . .
N2 N 0.45672(18) 0.30775(17) 0.30636(12) 0.0186(5) Uani 1 1 d . . . . .
N3 N 0.54210(19) 0.26798(18) 0.31463(12) 0.0201(5) Uani 1 1 d . . . . .
H3 H 0.550(3) 0.214(3) 0.302(2) 0.028(11) Uiso 1 1 d . . . . .
N4 N 0.1849(2) 0.74477(18) 0.36059(13) 0.0238(6) Uani 1 1 d . . . . .
H4 H 0.124(4) 0.745(3) 0.380(2) 0.031(11) Uiso 1 1 d . . . . .
C1 C 0.3345(2) 0.5102(2) 0.41068(13) 0.0191(6) Uani 1 1 d . . . . .
C2 C 0.3612(2) 0.5596(2) 0.36142(14) 0.0190(6) Uani 1 1 d . . . . .
C3 C 0.3129(2) 0.6377(2) 0.34759(14) 0.0191(6) Uani 1 1 d . . . . .
H3A H 0.333869 0.674543 0.316402 0.023 Uiso 1 1 calc R U . . .
C4 C 0.2340(2) 0.6623(2) 0.37918(14) 0.0194(6) Uani 1 1 d . . . . .
C5 C 0.1166(2) 0.6266(2) 0.45910(14) 0.0214(6) Uani 1 1 d . . . . .
C6 C 0.0925(2) 0.5669(2) 0.50515(14) 0.0235(6) Uani 1 1 d . . . . .
C7 C 0.1431(2) 0.4945(2) 0.52315(15) 0.0251(6) Uani 1 1 d . . . . .
C8 C 0.2259(2) 0.4766(2) 0.49128(14) 0.0233(6) Uani 1 1 d . . . . .
C9 C 0.2542(2) 0.5344(2) 0.44242(13) 0.0198(6) Uani 1 1 d . . . . .
C10 C 0.2011(2) 0.6111(2) 0.42628(14) 0.0197(6) Uani 1 1 d . . . . .
C11 C 0.0439(2) 0.6878(2) 0.45434(14) 0.0228(6) Uani 1 1 d . . . . .
C12 C -0.0283(2) 0.6650(2) 0.50103(15) 0.0245(6) Uani 1 1 d . . . . .
C13 C -0.0422(3) 0.7399(3) 0.54439(16) 0.0332(8) Uani 1 1 d . . . . .
H13A H -0.091290 0.723344 0.572040 0.050 Uiso 1 1 calc R U . . .
H13B H -0.060182 0.794526 0.523570 0.050 Uiso 1 1 calc R U . . .
H13C H 0.015732 0.750402 0.565743 0.050 Uiso 1 1 calc R U . . .
C14 C 0.1160(3) 0.4369(3) 0.57424(17) 0.0331(8) Uani 1 1 d . . . . .
H14A H 0.064622 0.465140 0.595373 0.050 Uiso 1 1 calc R U . . .
H14B H 0.169277 0.430096 0.600543 0.050 Uiso 1 1 calc R U . . .
H14C H 0.096543 0.377881 0.560128 0.050 Uiso 1 1 calc R U . . .
C15 C 0.4574(2) 0.5480(2) 0.27246(14) 0.0184(6) Uani 1 1 d . . . . .
C16 C 0.5309(2) 0.4944(2) 0.24182(14) 0.0203(6) Uani 1 1 d . . . . .
C17 C 0.5219(2) 0.4068(2) 0.23208(14) 0.0206(6) Uani 1 1 d . . . . .
H17 H 0.572488 0.378304 0.213035 0.025 Uiso 1 1 calc R U . . .
C18 C 0.4404(2) 0.34761(19) 0.24787(14) 0.0193(6) Uani 1 1 d . . . . .
H18 H 0.382655 0.384697 0.249128 0.023 Uiso 1 1 calc R U . . .
C19 C 0.4294(2) 0.2753(2) 0.20201(13) 0.0197(6) Uani 1 1 d . . . . .
H19 H 0.485034 0.247149 0.189381 0.024 Uiso 1 1 calc R U . . .
C20 C 0.3509(2) 0.2462(2) 0.17704(14) 0.0215(6) Uani 1 1 d . . . . .
C21 C 0.2563(2) 0.2831(2) 0.19332(14) 0.0215(6) Uani 1 1 d . . . . .
H21 H 0.260485 0.305339 0.234478 0.026 Uiso 1 1 calc R U . . .
C22 C 0.2213(2) 0.3617(2) 0.15528(15) 0.0225(6) Uani 1 1 d . . . . .
H22 H 0.267810 0.411061 0.159226 0.027 Uiso 1 1 calc R U . . .
C23 C 0.1282(2) 0.3984(2) 0.17816(15) 0.0237(6) Uani 1 1 d . . . . .
H23 H 0.109981 0.451292 0.153974 0.028 Uiso 1 1 calc R U . . .
C24 C 0.1304(2) 0.4264(2) 0.24269(15) 0.0232(6) Uani 1 1 d . . . . .
H24 H 0.148754 0.372497 0.265881 0.028 Uiso 1 1 calc R U . . .
C25 C 0.0347(2) 0.4560(2) 0.26467(15) 0.0221(6) Uani 1 1 d . . . . .
H25 H -0.012682 0.410822 0.252392 0.026 Uiso 1 1 calc R U . . .
C26 C 0.0281(2) 0.4700(2) 0.33085(15) 0.0229(6) Uani 1 1 d . . . . .
H26 H 0.069113 0.521596 0.341349 0.027 Uiso 1 1 calc R U . . .
C27 C -0.0724(2) 0.4958(2) 0.34654(15) 0.0230(6) Uani 1 1 d . . . . .
H27 H -0.091193 0.547379 0.321363 0.028 Uiso 1 1 calc R U . . .
C28 C -0.0810(2) 0.5239(2) 0.40952(15) 0.0255(7) Uani 1 1 d . . . . .
H28 H -0.062071 0.484530 0.439900 0.031 Uiso 1 1 calc R U . . .
C29 C -0.1151(2) 0.6040(2) 0.42229(15) 0.0234(6) Uani 1 1 d . . . . .
H29 H -0.141253 0.637338 0.390995 0.028 Uiso 1 1 calc R U . . .
C30 C 0.6094(2) 0.5486(2) 0.21665(16) 0.0254(7) Uani 1 1 d . . . . .
H30A H 0.585434 0.587968 0.185869 0.038 Uiso 1 1 calc R U . . .
H30B H 0.656130 0.508265 0.200087 0.038 Uiso 1 1 calc R U . . .
H30C H 0.637653 0.584861 0.247589 0.038 Uiso 1 1 calc R U . . .
C31 C 0.3532(3) 0.1692(2) 0.13469(16) 0.0264(7) Uani 1 1 d . . . . .
H31A H 0.329498 0.189026 0.096662 0.040 Uiso 1 1 calc R U . . .
H31B H 0.314277 0.120421 0.149529 0.040 Uiso 1 1 calc R U . . .
H31C H 0.417165 0.148033 0.130272 0.040 Uiso 1 1 calc R U . . .
C32 C 0.2135(2) 0.3404(2) 0.08987(15) 0.0265(7) Uani 1 1 d . . . . .
H32A H 0.274716 0.323904 0.074616 0.040 Uiso 1 1 calc R U . . .
H32B H 0.190448 0.393160 0.068968 0.040 Uiso 1 1 calc R U . . .
H32C H 0.170293 0.290451 0.084229 0.040 Uiso 1 1 calc R U . . .
C33 C 0.2038(2) 0.4981(2) 0.25362(19) 0.0323(8) Uani 1 1 d . . . . .
H33A H 0.265539 0.473224 0.245982 0.048 Uiso 1 1 calc R U . . .
H33B H 0.200174 0.518119 0.294360 0.048 Uiso 1 1 calc R U . . .
H33C H 0.192747 0.549051 0.227540 0.048 Uiso 1 1 calc R U . . .
C34 C 0.0616(3) 0.3880(3) 0.36538(17) 0.0314(7) Uani 1 1 d . . . . .
H34A H 0.029316 0.334422 0.351275 0.047 Uiso 1 1 calc R U . . .
H34B H 0.048226 0.396552 0.407008 0.047 Uiso 1 1 calc R U . . .
H34C H 0.128635 0.380565 0.359876 0.047 Uiso 1 1 calc R U . . .
C35 C -0.0634(3) 0.5476(3) 0.20375(16) 0.0318(8) Uani 1 1 d . . . . .
C36 C -0.0767(4) 0.6421(3) 0.18343(19) 0.0454(10) Uani 1 1 d . . . . .
H36A H -0.048489 0.683236 0.211664 0.068 Uiso 1 1 calc R U . . .
H36B H -0.143240 0.654958 0.180154 0.068 Uiso 1 1 calc R U . . .
H36C H -0.047170 0.649905 0.145178 0.068 Uiso 1 1 calc R U . . .
C37 C -0.2217(3) 0.4487(3) 0.31721(19) 0.0334(8) Uani 1 1 d . . . . .
H37A H -0.218573 0.494870 0.286864 0.050 Uiso 1 1 calc R U . . .
H37B H -0.252759 0.472932 0.351873 0.050 Uiso 1 1 calc R U . . .
H37C H -0.256711 0.397154 0.302489 0.050 Uiso 1 1 calc R U . . .
C38 C 0.3821(2) 0.2830(2) 0.34063(14) 0.0195(6) Uani 1 1 d . . . . .
C39 C 0.3340(3) 0.2043(3) 0.42438(16) 0.0296(7) Uani 1 1 d . . . . .
H39A H 0.286019 0.170209 0.402861 0.036 Uiso 1 1 calc R U . . .
H39B H 0.304661 0.257466 0.442376 0.036 Uiso 1 1 calc R U . . .
C40 C 0.3786(3) 0.1464(3) 0.47054(18) 0.0403(9) Uani 1 1 d . . . . .
H40A H 0.408291 0.094756 0.451934 0.060 Uiso 1 1 calc R U . . .
H40B H 0.331056 0.125623 0.498004 0.060 Uiso 1 1 calc R U . . .
H40C H 0.425397 0.181346 0.491681 0.060 Uiso 1 1 calc R U . . .
C41 C 0.6014(2) 0.3040(2) 0.35456(14) 0.0204(6) Uani 1 1 d . . . . .
C42 C 0.7453(3) 0.2681(2) 0.40248(16) 0.0296(7) Uani 1 1 d . . . . .
H42A H 0.723807 0.245242 0.440772 0.036 Uiso 1 1 calc R U . . .
H42B H 0.756471 0.333312 0.405970 0.036 Uiso 1 1 calc R U . . .
C43 C 0.8327(3) 0.2208(3) 0.38391(19) 0.0341(8) Uani 1 1 d . . . . .
H43A H 0.854950 0.246452 0.347054 0.051 Uiso 1 1 calc R U . . .
H43B H 0.819654 0.156992 0.378457 0.051 Uiso 1 1 calc R U . . .
H43C H 0.880283 0.228221 0.414126 0.051 Uiso 1 1 calc R U . . .
C44 C 0.2358(3) 0.8280(2) 0.3773(2) 0.0341(8) Uani 1 1 d . . . . .
H44A H 0.249382 0.826793 0.419289 0.051 Uiso 1 1 calc R U . . .
H44B H 0.197378 0.880351 0.368314 0.051 Uiso 1 1 calc R U . . .
H44C H 0.294068 0.831514 0.355309 0.051 Uiso 1 1 calc R U . . .
C45 C 0.1582(3) 0.7457(3) 0.29742(16) 0.0329(8) Uani 1 1 d . . . . .
H45A H 0.214278 0.745329 0.273207 0.049 Uiso 1 1 calc R U . . .
H45B H 0.121901 0.799655 0.289050 0.049 Uiso 1 1 calc R U . . .
H45C H 0.120753 0.692553 0.288607 0.049 Uiso 1 1 calc R U . . .
Cl1 Cl 0.67927(8) 0.50773(8) 0.49154(6) 0.0510(3) Uani 1 1 d . . . . .
Cl2 Cl 0.58878(9) 0.34272(9) 0.52552(5) 0.0516(3) Uani 1 1 d . . . . .
Cl3 Cl 0.49881(9) 0.51250(11) 0.54735(6) 0.0647(4) Uani 1 1 d . . . . .
C46 C 0.5721(3) 0.4529(3) 0.49936(17) 0.0374(9) Uani 1 1 d . . . . .
H46 H 0.541523 0.449684 0.460165 0.045 Uiso 1 1 calc R U . . .
 
loop_
 _atom_site_aniso_label
 _atom_site_aniso_U_11
 _atom_site_aniso_U_22
 _atom_site_aniso_U_33
 _atom_site_aniso_U_23
 _atom_site_aniso_U_13
 _atom_site_aniso_U_12
O1 0.0186(11) 0.0250(11) 0.0258(11) 0.0038(9) 0.0001(9) 0.0057(9)
O2 0.0260(12) 0.0285(12) 0.0318(12) 0.0082(10) 0.0038(10) 0.0057(10)
O3 0.0179(11) 0.0388(13) 0.0252(11) 0.0061(10) 0.0035(9) 0.0044(10)
O4 0.0190(11) 0.0282(11) 0.0303(11) 0.0016(10) 0.0010(9) 0.0063(9)
O5 0.0146(10) 0.0351(12) 0.0277(12) -0.0034(10) 0.0011(9) 0.0038(9)
O6 0.0174(11) 0.0244(11) 0.0434(14) 0.0000(10) -0.0011(10) -0.0002(9)
O7 0.0196(11) 0.0256(11) 0.0296(12) 0.0016(9) -0.0018(9) 0.0016(9)
O8 0.0321(15) 0.0575(18) 0.0434(15) 0.0029(14) -0.0150(13) -0.0012(14)
O9 0.0189(11) 0.0358(13) 0.0293(13) -0.0081(11) -0.0014(10) -0.0089(10)
O10 0.0215(12) 0.0260(11) 0.0314(12) 0.0027(10) 0.0003(10) -0.0077(10)
O11 0.0236(11) 0.0206(10) 0.0312(12) 0.0073(9) 0.0057(10) 0.0039(9)
O12 0.0151(11) 0.0340(12) 0.0275(11) 0.0012(10) 0.0015(9) 0.0010(9)
O13 0.0211(11) 0.0255(11) 0.0232(10) 0.0030(9) 0.0035(9) -0.0004(9)
O14 0.0228(12) 0.0274(12) 0.0282(12) -0.0071(9) 0.0002(9) -0.0009(9)
O15 0.0181(11) 0.0267(11) 0.0348(13) -0.0031(10) -0.0067(10) 0.0032(9)
N1 0.0128(11) 0.0184(11) 0.0243(12) 0.0012(10) 0.0011(10) 0.0021(9)
N2 0.0126(11) 0.0205(11) 0.0226(12) 0.0007(10) 0.0009(10) 0.0015(9)
N3 0.0158(12) 0.0182(12) 0.0263(13) -0.0016(10) -0.0028(10) 0.0027(10)
N4 0.0234(14) 0.0207(13) 0.0273(14) 0.0017(11) 0.0019(11) 0.0039(10)
C1 0.0150(13) 0.0216(13) 0.0208(13) -0.0028(11) -0.0039(11) 0.0005(11)
C2 0.0150(13) 0.0191(13) 0.0228(14) -0.0023(11) 0.0001(11) -0.0010(11)
C3 0.0158(14) 0.0192(13) 0.0223(14) -0.0003(11) -0.0009(12) -0.0003(11)
C4 0.0163(14) 0.0177(13) 0.0240(14) 0.0010(11) -0.0033(12) 0.0028(11)
C5 0.0165(14) 0.0245(14) 0.0232(14) -0.0012(12) -0.0011(12) 0.0005(12)
C6 0.0169(14) 0.0317(16) 0.0218(14) -0.0014(13) 0.0009(12) 0.0012(12)
C7 0.0206(15) 0.0316(16) 0.0230(14) 0.0050(13) 0.0006(12) 0.0012(12)
C8 0.0195(14) 0.0262(14) 0.0243(14) 0.0011(12) -0.0042(12) -0.0007(12)
C9 0.0159(14) 0.0226(14) 0.0210(13) -0.0003(11) -0.0021(11) 0.0001(11)
C10 0.0133(13) 0.0224(14) 0.0233(14) -0.0027(12) -0.0032(11) 0.0015(11)
C11 0.0189(14) 0.0284(16) 0.0212(14) -0.0030(12) -0.0010(12) 0.0025(12)
C12 0.0172(14) 0.0324(16) 0.0239(15) -0.0013(13) 0.0015(12) 0.0039(12)
C13 0.0255(17) 0.045(2) 0.0286(16) -0.0100(16) 0.0011(14) 0.0013(15)
C14 0.0250(17) 0.041(2) 0.0330(18) 0.0124(16) 0.0057(15) 0.0041(15)
C15 0.0141(13) 0.0172(12) 0.0240(14) -0.0002(11) -0.0009(11) -0.0035(11)
C16 0.0165(14) 0.0208(14) 0.0237(14) 0.0003(12) 0.0014(11) -0.0010(11)
C17 0.0162(14) 0.0229(14) 0.0225(14) -0.0013(12) 0.0037(11) 0.0009(11)
C18 0.0145(13) 0.0173(13) 0.0261(15) 0.0005(12) 0.0013(12) 0.0007(11)
C19 0.0200(14) 0.0181(13) 0.0210(13) 0.0002(11) 0.0005(11) 0.0022(11)
C20 0.0230(15) 0.0199(13) 0.0217(14) 0.0025(12) -0.0006(12) -0.0025(12)
C21 0.0177(14) 0.0229(14) 0.0239(14) 0.0004(12) -0.0008(12) -0.0024(12)
C22 0.0188(15) 0.0228(14) 0.0259(15) 0.0025(12) -0.0013(12) -0.0036(12)
C23 0.0159(14) 0.0258(14) 0.0293(16) 0.0000(13) -0.0038(12) -0.0040(12)
C24 0.0159(15) 0.0223(14) 0.0314(17) -0.0059(13) -0.0023(12) 0.0006(12)
C25 0.0172(14) 0.0220(14) 0.0270(15) -0.0019(12) -0.0032(12) -0.0010(12)
C26 0.0160(14) 0.0233(14) 0.0292(16) -0.0018(13) -0.0020(12) 0.0014(11)
C27 0.0204(15) 0.0196(14) 0.0291(15) 0.0020(12) 0.0003(12) 0.0009(12)
C28 0.0236(15) 0.0248(15) 0.0281(16) 0.0047(13) 0.0007(13) 0.0010(12)
C29 0.0166(14) 0.0291(15) 0.0244(15) 0.0023(13) -0.0009(12) 0.0013(12)
C30 0.0188(15) 0.0234(14) 0.0341(17) -0.0007(13) 0.0090(13) -0.0027(12)
C31 0.0285(17) 0.0222(14) 0.0283(16) -0.0033(13) -0.0002(13) -0.0025(13)
C32 0.0244(16) 0.0291(15) 0.0259(16) 0.0043(13) 0.0017(13) -0.0007(13)
C33 0.0162(15) 0.0316(17) 0.049(2) -0.0134(16) -0.0016(14) -0.0019(13)
C34 0.0299(18) 0.0317(17) 0.0325(17) 0.0028(14) -0.0005(15) 0.0089(14)
C35 0.0217(16) 0.045(2) 0.0291(17) 0.0033(15) 0.0009(14) 0.0067(15)
C36 0.052(3) 0.050(2) 0.034(2) 0.0073(18) 0.0006(19) 0.021(2)
C37 0.0196(16) 0.0346(17) 0.046(2) 0.0031(16) -0.0020(15) -0.0007(14)
C38 0.0155(14) 0.0205(13) 0.0227(14) -0.0014(11) -0.0003(11) -0.0014(11)
C39 0.0260(17) 0.0312(17) 0.0316(17) 0.0046(14) 0.0097(14) -0.0027(14)
C40 0.041(2) 0.046(2) 0.0340(19) 0.0145(17) 0.0122(17) -0.0001(18)
C41 0.0172(14) 0.0223(14) 0.0216(14) 0.0020(12) 0.0008(12) -0.0016(11)
C42 0.0232(16) 0.0325(16) 0.0331(17) 0.0011(14) -0.0099(14) -0.0010(14)
C43 0.0208(17) 0.0363(19) 0.045(2) 0.0054(16) -0.0047(15) 0.0017(14)
C44 0.0281(18) 0.0221(15) 0.052(2) 0.0007(15) 0.0009(17) 0.0026(14)
C45 0.0334(19) 0.0377(19) 0.0275(17) 0.0031(15) -0.0026(14) 0.0153(15)
Cl1 0.0425(6) 0.0537(6) 0.0567(6) -0.0081(5) 0.0007(5) -0.0067(5)
Cl2 0.0602(7) 0.0557(6) 0.0390(5) 0.0051(5) 0.0074(5) 0.0010(5)
Cl3 0.0506(7) 0.0911(10) 0.0524(6) -0.0340(7) -0.0001(5) 0.0241(7)
C46 0.0319(19) 0.051(2) 0.0292(18) -0.0086(17) -0.0022(15) 0.0091(17)
 
_geom_special_details
;
 All esds (except the esd in the dihedral angle between two l.s. planes)
 are estimated using the full covariance matrix.  The cell esds are taken
 into account individually in the estimation of esds in distances, angles
 and torsion angles; correlations between esds in cell parameters are only
 used when they are defined by crystal symmetry.  An approximate (isotropic)
 treatment of cell esds is used for estimating esds involving l.s. planes.
;
 
loop_
 _geom_bond_atom_site_label_1
 _geom_bond_atom_site_label_2
 _geom_bond_distance
 _geom_bond_site_symmetry_2
 _geom_bond_publ_flag
O1 C1 1.332(4) . ?
O1 H1A 0.96(8) . ?
O2 C8 1.278(4) . ?
O3 C6 1.363(4) . ?
O3 C12 1.443(4) . ?
O4 C11 1.266(4) . ?
O5 C29 1.388(4) . ?
O5 C12 1.416(4) . ?
O6 C37 1.425(4) . ?
O6 C27 1.429(4) . ?
O7 C35 1.349(4) . ?
O7 C25 1.460(4) . ?
O8 C35 1.195(5) . ?
O9 C23 1.444(4) . ?
O9 H9 0.73(6) . ?
O10 C21 1.437(4) . ?
O10 H10 0.75(6) . ?
O11 C15 1.233(4) . ?
O12 C38 1.216(4) . ?
O13 C38 1.336(4) . ?
O13 C39 1.457(4) . ?
O14 C41 1.210(4) . ?
O15 C41 1.349(4) . ?
O15 C42 1.454(4) . ?
N1 C15 1.350(4) . ?
N1 C2 1.419(4) . ?
N1 H1B 0.89(5) . ?
N2 N3 1.379(4) . ?
N2 C38 1.380(4) . ?
N2 C18 1.483(4) . ?
N3 C41 1.362(4) . ?
N3 H3 0.86(5) . ?
N4 C4 1.483(4) . ?
N4 C44 1.493(5) . ?
N4 C45 1.496(4) . ?
N4 H4 0.99(5) . ?
C1 C2 1.401(5) . ?
C1 C9 1.412(4) . ?
C2 C3 1.395(4) . ?
C3 C4 1.396(5) . ?
C3 H3A 0.9500 . ?
C4 C10 1.403(5) . ?
C5 C11 1.395(5) . ?
C5 C6 1.423(5) . ?
C5 C10 1.449(4) . ?
C6 C7 1.368(5) . ?
C7 C8 1.422(5) . ?
C7 C14 1.503(5) . ?
C8 C9 1.470(5) . ?
C9 C10 1.427(4) . ?
C11 C12 1.529(5) . ?
C12 C13 1.508(5) . ?
C13 H13A 0.9800 . ?
C13 H13B 0.9800 . ?
C13 H13C 0.9800 . ?
C14 H14A 0.9800 . ?
C14 H14B 0.9800 . ?
C14 H14C 0.9800 . ?
C15 C16 1.501(4) . ?
C16 C17 1.334(5) . ?
C16 C30 1.505(4) . ?
C17 C18 1.514(4) . ?
C17 H17 0.9500 . ?
C18 C19 1.514(4) . ?
C18 H18 1.0000 . ?
C19 C20 1.339(5) . ?
C19 H19 0.9500 . ?
C20 C31 1.504(4) . ?
C20 C21 1.517(4) . ?
C21 C22 1.546(4) . ?
C21 H21 1.0000 . ?
C22 C32 1.534(5) . ?
C22 C23 1.540(5) . ?
C22 H22 1.0000 . ?
C23 C24 1.535(5) . ?
C23 H23 1.0000 . ?
C24 C33 1.525(4) . ?
C24 C25 1.532(4) . ?
C24 H24 1.0000 . ?
C25 C26 1.531(5) . ?
C25 H25 1.0000 . ?
C26 C34 1.536(5) . ?
C26 C27 1.540(4) . ?
C26 H26 1.0000 . ?
C27 C28 1.506(5) . ?
C27 H27 1.0000 . ?
C28 C29 1.327(5) . ?
C28 H28 0.9500 . ?
C29 H29 0.9500 . ?
C30 H30A 0.9800 . ?
C30 H30B 0.9800 . ?
C30 H30C 0.9800 . ?
C31 H31A 0.9800 . ?
C31 H31B 0.9800 . ?
C31 H31C 0.9800 . ?
C32 H32A 0.9800 . ?
C32 H32B 0.9800 . ?
C32 H32C 0.9800 . ?
C33 H33A 0.9800 . ?
C33 H33B 0.9800 . ?
C33 H33C 0.9800 . ?
C34 H34A 0.9800 . ?
C34 H34B 0.9800 . ?
C34 H34C 0.9800 . ?
C35 C36 1.499(6) . ?
C36 H36A 0.9800 . ?
C36 H36B 0.9800 . ?
C36 H36C 0.9800 . ?
C37 H37A 0.9800 . ?
C37 H37B 0.9800 . ?
C37 H37C 0.9800 . ?
C39 C40 1.508(6) . ?
C39 H39A 0.9900 . ?
C39 H39B 0.9900 . ?
C40 H40A 0.9800 . ?
C40 H40B 0.9800 . ?
C40 H40C 0.9800 . ?
C42 C43 1.505(5) . ?
C42 H42A 0.9900 . ?
C42 H42B 0.9900 . ?
C43 H43A 0.9800 . ?
C43 H43B 0.9800 . ?
C43 H43C 0.9800 . ?
C44 H44A 0.9800 . ?
C44 H44B 0.9800 . ?
C44 H44C 0.9800 . ?
C45 H45A 0.9800 . ?
C45 H45B 0.9800 . ?
C45 H45C 0.9800 . ?
Cl1 C46 1.757(5) . ?
Cl2 C46 1.768(5) . ?
Cl3 C46 1.764(4) . ?
C46 H46 1.0000 . ?
 
loop_
 _geom_angle_atom_site_label_1
 _geom_angle_atom_site_label_2
 _geom_angle_atom_site_label_3
 _geom_angle
 _geom_angle_site_symmetry_1
 _geom_angle_site_symmetry_3
 _geom_angle_publ_flag
C1 O1 H1A 104(5) . . ?
C6 O3 C12 108.4(3) . . ?
C29 O5 C12 115.8(2) . . ?
C37 O6 C27 111.6(3) . . ?
C35 O7 C25 118.3(3) . . ?
C23 O9 H9 110(5) . . ?
C21 O10 H10 107(5) . . ?
C38 O13 C39 114.7(3) . . ?
C41 O15 C42 118.1(3) . . ?
C15 N1 C2 126.1(3) . . ?
C15 N1 H1B 121(3) . . ?
C2 N1 H1B 112(3) . . ?
N3 N2 C38 120.1(3) . . ?
N3 N2 C18 116.0(2) . . ?
C38 N2 C18 119.8(3) . . ?
C41 N3 N2 118.8(3) . . ?
C41 N3 H3 121(3) . . ?
N2 N3 H3 118(3) . . ?
C4 N4 C44 112.6(3) . . ?
C4 N4 C45 114.0(3) . . ?
C44 N4 C45 111.5(3) . . ?
C4 N4 H4 108(3) . . ?
C44 N4 H4 108(3) . . ?
C45 N4 H4 102(3) . . ?
O1 C1 C2 118.1(3) . . ?
O1 C1 C9 121.6(3) . . ?
C2 C1 C9 120.2(3) . . ?
C3 C2 C1 119.1(3) . . ?
C3 C2 N1 124.4(3) . . ?
C1 C2 N1 116.5(3) . . ?
C2 C3 C4 120.5(3) . . ?
C2 C3 H3A 119.7 . . ?
C4 C3 H3A 119.7 . . ?
C3 C4 C10 122.0(3) . . ?
C3 C4 N4 117.2(3) . . ?
C10 C4 N4 120.8(3) . . ?
C11 C5 C6 106.6(3) . . ?
C11 C5 C10 134.1(3) . . ?
C6 C5 C10 119.2(3) . . ?
O3 C6 C7 121.3(3) . . ?
O3 C6 C5 112.6(3) . . ?
C7 C6 C5 126.1(3) . . ?
C6 C7 C8 116.2(3) . . ?
C6 C7 C14 123.3(3) . . ?
C8 C7 C14 120.6(3) . . ?
O2 C8 C7 120.3(3) . . ?
O2 C8 C9 118.9(3) . . ?
C7 C8 C9 120.8(3) . . ?
C1 C9 C10 120.7(3) . . ?
C1 C9 C8 117.9(3) . . ?
C10 C9 C8 121.3(3) . . ?
C4 C10 C9 117.1(3) . . ?
C4 C10 C5 126.5(3) . . ?
C9 C10 C5 116.4(3) . . ?
O4 C11 C5 131.2(3) . . ?
O4 C11 C12 120.8(3) . . ?
C5 C11 C12 108.1(3) . . ?
O5 C12 O3 109.4(3) . . ?
O5 C12 C13 107.6(3) . . ?
O3 C12 C13 109.9(3) . . ?
O5 C12 C11 113.0(3) . . ?
O3 C12 C11 104.3(3) . . ?
C13 C12 C11 112.6(3) . . ?
C12 C13 H13A 109.5 . . ?
C12 C13 H13B 109.5 . . ?
H13A C13 H13B 109.5 . . ?
C12 C13 H13C 109.5 . . ?
H13A C13 H13C 109.5 . . ?
H13B C13 H13C 109.5 . . ?
C7 C14 H14A 109.5 . . ?
C7 C14 H14B 109.5 . . ?
H14A C14 H14B 109.5 . . ?
C7 C14 H14C 109.5 . . ?
H14A C14 H14C 109.5 . . ?
H14B C14 H14C 109.5 . . ?
O11 C15 N1 123.1(3) . . ?
O11 C15 C16 119.3(3) . . ?
N1 C15 C16 117.5(3) . . ?
C17 C16 C15 122.2(3) . . ?
C17 C16 C30 122.5(3) . . ?
C15 C16 C30 114.9(3) . . ?
C16 C17 C18 127.5(3) . . ?
C16 C17 H17 116.2 . . ?
C18 C17 H17 116.2 . . ?
N2 C18 C17 109.1(3) . . ?
N2 C18 C19 110.8(2) . . ?
C17 C18 C19 109.4(3) . . ?
N2 C18 H18 109.2 . . ?
C17 C18 H18 109.2 . . ?
C19 C18 H18 109.2 . . ?
C20 C19 C18 128.0(3) . . ?
C20 C19 H19 116.0 . . ?
C18 C19 H19 116.0 . . ?
C19 C20 C31 120.4(3) . . ?
C19 C20 C21 122.4(3) . . ?
C31 C20 C21 117.1(3) . . ?
O10 C21 C20 107.2(3) . . ?
O10 C21 C22 111.8(3) . . ?
C20 C21 C22 115.5(3) . . ?
O10 C21 H21 107.3 . . ?
C20 C21 H21 107.3 . . ?
C22 C21 H21 107.3 . . ?
C32 C22 C23 110.0(3) . . ?
C32 C22 C21 114.5(3) . . ?
C23 C22 C21 111.3(3) . . ?
C32 C22 H22 106.9 . . ?
C23 C22 H22 106.9 . . ?
C21 C22 H22 106.9 . . ?
O9 C23 C24 105.7(3) . . ?
O9 C23 C22 110.7(3) . . ?
C24 C23 C22 114.0(3) . . ?
O9 C23 H23 108.8 . . ?
C24 C23 H23 108.8 . . ?
C22 C23 H23 108.8 . . ?
C33 C24 C25 111.5(3) . . ?
C33 C24 C23 111.3(3) . . ?
C25 C24 C23 112.1(3) . . ?
C33 C24 H24 107.2 . . ?
C25 C24 H24 107.2 . . ?
C23 C24 H24 107.2 . . ?
O7 C25 C26 106.9(3) . . ?
O7 C25 C24 107.6(3) . . ?
C26 C25 C24 114.8(3) . . ?
O7 C25 H25 109.1 . . ?
C26 C25 H25 109.1 . . ?
C24 C25 H25 109.1 . . ?
C25 C26 C34 112.3(3) . . ?
C25 C26 C27 108.8(3) . . ?
C34 C26 C27 112.0(3) . . ?
C25 C26 H26 107.8 . . ?
C34 C26 H26 107.8 . . ?
C27 C26 H26 107.8 . . ?
O6 C27 C28 112.8(3) . . ?
O6 C27 C26 107.4(3) . . ?
C28 C27 C26 111.7(3) . . ?
O6 C27 H27 108.3 . . ?
C28 C27 H27 108.3 . . ?
C26 C27 H27 108.3 . . ?
C29 C28 C27 119.5(3) . . ?
C29 C28 H28 120.2 . . ?
C27 C28 H28 120.2 . . ?
C28 C29 O5 125.9(3) . . ?
C28 C29 H29 117.0 . . ?
O5 C29 H29 117.0 . . ?
C16 C30 H30A 109.5 . . ?
C16 C30 H30B 109.5 . . ?
H30A C30 H30B 109.5 . . ?
C16 C30 H30C 109.5 . . ?
H30A C30 H30C 109.5 . . ?
H30B C30 H30C 109.5 . . ?
C20 C31 H31A 109.5 . . ?
C20 C31 H31B 109.5 . . ?
H31A C31 H31B 109.5 . . ?
C20 C31 H31C 109.5 . . ?
H31A C31 H31C 109.5 . . ?
H31B C31 H31C 109.5 . . ?
C22 C32 H32A 109.5 . . ?
C22 C32 H32B 109.5 . . ?
H32A C32 H32B 109.5 . . ?
C22 C32 H32C 109.5 . . ?
H32A C32 H32C 109.5 . . ?
H32B C32 H32C 109.5 . . ?
C24 C33 H33A 109.5 . . ?
C24 C33 H33B 109.5 . . ?
H33A C33 H33B 109.5 . . ?
C24 C33 H33C 109.5 . . ?
H33A C33 H33C 109.5 . . ?
H33B C33 H33C 109.5 . . ?
C26 C34 H34A 109.5 . . ?
C26 C34 H34B 109.5 . . ?
H34A C34 H34B 109.5 . . ?
C26 C34 H34C 109.5 . . ?
H34A C34 H34C 109.5 . . ?
H34B C34 H34C 109.5 . . ?
O8 C35 O7 124.9(4) . . ?
O8 C35 C36 125.1(4) . . ?
O7 C35 C36 110.0(4) . . ?
C35 C36 H36A 109.5 . . ?
C35 C36 H36B 109.5 . . ?
H36A C36 H36B 109.5 . . ?
C35 C36 H36C 109.5 . . ?
H36A C36 H36C 109.5 . . ?
H36B C36 H36C 109.5 . . ?
O6 C37 H37A 109.5 . . ?
O6 C37 H37B 109.5 . . ?
H37A C37 H37B 109.5 . . ?
O6 C37 H37C 109.5 . . ?
H37A C37 H37C 109.5 . . ?
H37B C37 H37C 109.5 . . ?
O12 C38 O13 125.5(3) . . ?
O12 C38 N2 123.0(3) . . ?
O13 C38 N2 111.4(3) . . ?
O13 C39 C40 106.0(3) . . ?
O13 C39 H39A 110.5 . . ?
C40 C39 H39A 110.5 . . ?
O13 C39 H39B 110.5 . . ?
C40 C39 H39B 110.5 . . ?
H39A C39 H39B 108.7 . . ?
C39 C40 H40A 109.5 . . ?
C39 C40 H40B 109.5 . . ?
H40A C40 H40B 109.5 . . ?
C39 C40 H40C 109.5 . . ?
H40A C40 H40C 109.5 . . ?
H40B C40 H40C 109.5 . . ?
O14 C41 O15 126.9(3) . . ?
O14 C41 N3 125.5(3) . . ?
O15 C41 N3 107.5(3) . . ?
O15 C42 C43 106.5(3) . . ?
O15 C42 H42A 110.4 . . ?
C43 C42 H42A 110.4 . . ?
O15 C42 H42B 110.4 . . ?
C43 C42 H42B 110.4 . . ?
H42A C42 H42B 108.6 . . ?
C42 C43 H43A 109.5 . . ?
C42 C43 H43B 109.5 . . ?
H43A C43 H43B 109.5 . . ?
C42 C43 H43C 109.5 . . ?
H43A C43 H43C 109.5 . . ?
H43B C43 H43C 109.5 . . ?
N4 C44 H44A 109.5 . . ?
N4 C44 H44B 109.5 . . ?
H44A C44 H44B 109.5 . . ?
N4 C44 H44C 109.5 . . ?
H44A C44 H44C 109.5 . . ?
H44B C44 H44C 109.5 . . ?
N4 C45 H45A 109.5 . . ?
N4 C45 H45B 109.5 . . ?
H45A C45 H45B 109.5 . . ?
N4 C45 H45C 109.5 . . ?
H45A C45 H45C 109.5 . . ?
H45B C45 H45C 109.5 . . ?
Cl1 C46 Cl3 110.7(2) . . ?
Cl1 C46 Cl2 110.4(2) . . ?
Cl3 C46 Cl2 109.9(2) . . ?
Cl1 C46 H46 108.6 . . ?
Cl3 C46 H46 108.6 . . ?
Cl2 C46 H46 108.6 . . ?
 
loop_
 _geom_torsion_atom_site_label_1
 _geom_torsion_atom_site_label_2
 _geom_torsion_atom_site_label_3
 _geom_torsion_atom_site_label_4
 _geom_torsion
 _geom_torsion_site_symmetry_1
 _geom_torsion_site_symmetry_2
 _geom_torsion_site_symmetry_3
 _geom_torsion_site_symmetry_4
 _geom_torsion_publ_flag
C38 N2 N3 C41 -87.9(4) . . . . ?
C18 N2 N3 C41 115.1(3) . . . . ?
O1 C1 C2 C3 -175.8(3) . . . . ?
C9 C1 C2 C3 6.2(4) . . . . ?
O1 C1 C2 N1 6.5(4) . . . . ?
C9 C1 C2 N1 -171.5(3) . . . . ?
C15 N1 C2 C3 -13.6(5) . . . . ?
C15 N1 C2 C1 164.0(3) . . . . ?
C1 C2 C3 C4 -5.6(5) . . . . ?
N1 C2 C3 C4 171.9(3) . . . . ?
C2 C3 C4 C10 1.2(5) . . . . ?
C2 C3 C4 N4 -178.2(3) . . . . ?
C44 N4 C4 C3 -74.1(4) . . . . ?
C45 N4 C4 C3 54.3(4) . . . . ?
C44 N4 C4 C10 106.5(4) . . . . ?
C45 N4 C4 C10 -125.1(3) . . . . ?
C12 O3 C6 C7 -178.3(3) . . . . ?
C12 O3 C6 C5 0.2(4) . . . . ?
C11 C5 C6 O3 -0.8(4) . . . . ?
C10 C5 C6 O3 -177.2(3) . . . . ?
C11 C5 C6 C7 177.6(3) . . . . ?
C10 C5 C6 C7 1.2(5) . . . . ?
O3 C6 C7 C8 176.2(3) . . . . ?
C5 C6 C7 C8 -2.0(5) . . . . ?
O3 C6 C7 C14 -5.1(5) . . . . ?
C5 C6 C7 C14 176.7(3) . . . . ?
C6 C7 C8 O2 -178.3(3) . . . . ?
C14 C7 C8 O2 3.0(5) . . . . ?
C6 C7 C8 C9 0.6(5) . . . . ?
C14 C7 C8 C9 -178.1(3) . . . . ?
O1 C1 C9 C10 179.7(3) . . . . ?
C2 C1 C9 C10 -2.4(4) . . . . ?
O1 C1 C9 C8 -2.0(4) . . . . ?
C2 C1 C9 C8 175.9(3) . . . . ?
O2 C8 C9 C1 2.1(4) . . . . ?
C7 C8 C9 C1 -176.8(3) . . . . ?
O2 C8 C9 C10 -179.6(3) . . . . ?
C7 C8 C9 C10 1.5(5) . . . . ?
C3 C4 C10 C9 2.6(4) . . . . ?
N4 C4 C10 C9 -178.0(3) . . . . ?
C3 C4 C10 C5 -175.1(3) . . . . ?
N4 C4 C10 C5 4.3(5) . . . . ?
C1 C9 C10 C4 -2.0(4) . . . . ?
C8 C9 C10 C4 179.8(3) . . . . ?
C1 C9 C10 C5 175.9(3) . . . . ?
C8 C9 C10 C5 -2.3(4) . . . . ?
C11 C5 C10 C4 3.6(6) . . . . ?
C6 C5 C10 C4 178.8(3) . . . . ?
C11 C5 C10 C9 -174.1(3) . . . . ?
C6 C5 C10 C9 1.1(4) . . . . ?
C6 C5 C11 O4 -179.3(3) . . . . ?
C10 C5 C11 O4 -3.6(7) . . . . ?
C6 C5 C11 C12 1.0(4) . . . . ?
C10 C5 C11 C12 176.6(3) . . . . ?
C29 O5 C12 O3 -85.2(3) . . . . ?
C29 O5 C12 C13 155.4(3) . . . . ?
C29 O5 C12 C11 30.4(4) . . . . ?
C6 O3 C12 O5 121.5(3) . . . . ?
C6 O3 C12 C13 -120.5(3) . . . . ?
C6 O3 C12 C11 0.4(3) . . . . ?
O4 C11 C12 O5 60.7(4) . . . . ?
C5 C11 C12 O5 -119.6(3) . . . . ?
O4 C11 C12 O3 179.3(3) . . . . ?
C5 C11 C12 O3 -0.9(4) . . . . ?
O4 C11 C12 C13 -61.5(4) . . . . ?
C5 C11 C12 C13 118.2(3) . . . . ?
C2 N1 C15 O11 8.0(5) . . . . ?
C2 N1 C15 C16 -173.1(3) . . . . ?
O11 C15 C16 C17 -121.4(4) . . . . ?
N1 C15 C16 C17 59.8(4) . . . . ?
O11 C15 C16 C30 51.5(4) . . . . ?
N1 C15 C16 C30 -127.4(3) . . . . ?
C15 C16 C17 C18 1.1(5) . . . . ?
C30 C16 C17 C18 -171.2(3) . . . . ?
N3 N2 C18 C17 -49.6(3) . . . . ?
C38 N2 C18 C17 153.3(3) . . . . ?
N3 N2 C18 C19 70.9(3) . . . . ?
C38 N2 C18 C19 -86.1(3) . . . . ?
C16 C17 C18 N2 -92.2(4) . . . . ?
C16 C17 C18 C19 146.4(3) . . . . ?
N2 C18 C19 C20 103.3(4) . . . . ?
C17 C18 C19 C20 -136.4(3) . . . . ?
C18 C19 C20 C31 -176.2(3) . . . . ?
C18 C19 C20 C21 -1.2(5) . . . . ?
C19 C20 C21 O10 -141.8(3) . . . . ?
C31 C20 C21 O10 33.3(4) . . . . ?
C19 C20 C21 C22 92.8(4) . . . . ?
C31 C20 C21 C22 -92.0(3) . . . . ?
O10 C21 C22 C32 -64.4(4) . . . . ?
C20 C21 C22 C32 58.6(4) . . . . ?
O10 C21 C22 C23 61.1(3) . . . . ?
C20 C21 C22 C23 -176.0(3) . . . . ?
C32 C22 C23 O9 64.0(3) . . . . ?
C21 C22 C23 O9 -64.0(3) . . . . ?
C32 C22 C23 C24 -177.0(3) . . . . ?
C21 C22 C23 C24 55.0(4) . . . . ?
O9 C23 C24 C33 -179.7(3) . . . . ?
C22 C23 C24 C33 58.5(4) . . . . ?
O9 C23 C24 C25 -54.0(3) . . . . ?
C22 C23 C24 C25 -175.9(3) . . . . ?
C35 O7 C25 C26 -115.7(3) . . . . ?
C35 O7 C25 C24 120.5(3) . . . . ?
C33 C24 C25 O7 54.8(4) . . . . ?
C23 C24 C25 O7 -70.8(3) . . . . ?
C33 C24 C25 C26 -64.1(4) . . . . ?
C23 C24 C25 C26 170.4(3) . . . . ?
O7 C25 C26 C34 -172.4(3) . . . . ?
C24 C25 C26 C34 -53.2(4) . . . . ?
O7 C25 C26 C27 63.0(3) . . . . ?
C24 C25 C26 C27 -177.8(3) . . . . ?
C37 O6 C27 C28 85.5(4) . . . . ?
C37 O6 C27 C26 -151.0(3) . . . . ?
C25 C26 C27 O6 64.3(3) . . . . ?
C34 C26 C27 O6 -60.5(4) . . . . ?
C25 C26 C27 C28 -171.6(3) . . . . ?
C34 C26 C27 C28 63.7(4) . . . . ?
O6 C27 C28 C29 -115.7(3) . . . . ?
C26 C27 C28 C29 123.2(3) . . . . ?
C27 C28 C29 O5 -171.2(3) . . . . ?
C12 O5 C29 C28 65.9(4) . . . . ?
C25 O7 C35 O8 -3.3(5) . . . . ?
C25 O7 C35 C36 175.9(3) . . . . ?
C39 O13 C38 O12 -0.7(5) . . . . ?
C39 O13 C38 N2 178.3(3) . . . . ?
N3 N2 C38 O12 -170.9(3) . . . . ?
C18 N2 C38 O12 -14.8(5) . . . . ?
N3 N2 C38 O13 10.1(4) . . . . ?
C18 N2 C38 O13 166.1(2) . . . . ?
C38 O13 C39 C40 179.7(3) . . . . ?
C42 O15 C41 O14 10.2(5) . . . . ?
C42 O15 C41 N3 -172.5(3) . . . . ?
N2 N3 C41 O14 -6.8(5) . . . . ?
N2 N3 C41 O15 175.8(3) . . . . ?
C41 O15 C42 C43 -161.7(3) . . . . ?
 
loop_
 _geom_hbond_atom_site_label_D 
 _geom_hbond_atom_site_label_H 
 _geom_hbond_atom_site_label_A 
 _geom_hbond_distance_DH 
 _geom_hbond_distance_HA 
 _geom_hbond_distance_DA 
 _geom_hbond_angle_DHA 
 _geom_hbond_site_symmetry_A 
 _geom_hbond_publ_flag
O1 H1A O2  0.96(8) 1.54(8) 2.436(3) 154(7) . yes
O9 H9 O4  0.73(6) 2.10(6) 2.751(4) 149(6) 3_545 yes
O10 H10 O9  0.75(6) 2.05(6) 2.711(4) 147(6) . yes
N1 H1B O1  0.89(5) 2.22(5) 2.666(4) 111(4) . yes
N1 H1B O14  0.89(5) 2.54(5) 3.390(4) 159(4) . yes
N1 H1B N2  0.89(5) 2.68(5) 3.279(4) 126(4) . yes
N3 H3 O11  0.86(5) 1.94(5) 2.771(4) 163(4) 3_645 yes
N4 H4 O4  0.99(5) 1.61(5) 2.595(4) 172(4) . yes
 
_refine_diff_density_max    0.653
_refine_diff_density_min   -0.480
_refine_diff_density_rms    0.053

_shelx_res_file
;
TITL p12063 in P2(1)2(1)2(1)
    p12063.res
    created by SHELXL-2018/3 at 15:59:08 on 17-May-2021
CELL 1.54178  14.40567  14.94095  22.87351  90.0000  90.0000  90.0000
ZERR    4.00   0.00040   0.00034   0.00066   0.0000   0.0000   0.0000
LATT -1
SYMM 0.5-X, -Y, 0.5+Z
SYMM -X, 0.5+Y, 0.5-Z
SYMM 0.5+X, 0.5-Y, -Z
SFAC C H N O CL
UNIT 184 252 16 60 12
SHEL 200.00 0.80
TEMP -173
SIZE 0.25 0.20 0.07
OMIT 8 5 13
OMIT 12 2 4
OMIT -10 8 18
OMIT 17 0 5
OMIT 14 5 11
OMIT 12 3 4
L.S.20
BOND $H
CONF
ACTA
EQIV $1 -x, y-1/2, -z+1/2
EQIV $2 -x+1, y-1/2, -z+1/2
HTAB O1 O2
HTAB O9 O4_$1
HTAB O10 O9
HTAB N1 O1
HTAB N1 O14
HTAB N1 N2
HTAB N3 O11_$2
HTAB N4 O4
RTAB DIST O1 O2
RTAB DIST O9 O10
RTAB DIST O1 O9
RTAB DIST O2 O10
RTAB DIST O1 O10
RTAB DIST O2 O9
RTAB DIST C2 C33
MPLA 13 C1 C2 C3 C4 C10 C5 C11 C12 O3 C6 C7 C8 C9
WPDB -1
FMAP 2
PLAN -5
WGHT    0.056500    2.200000
FVAR       0.30497
O1    4    0.385187    0.439026    0.425193    11.00000    0.01864    0.02500 =
         0.02581    0.00376    0.00007    0.00575
H1A   2    0.356133    0.416696    0.459970    11.00000    0.08190
O2    4    0.276143    0.408970    0.504200    11.00000    0.02604    0.02852 =
         0.03178    0.00815    0.00383    0.00570
O3    4    0.009367    0.587477    0.530237    11.00000    0.01791    0.03875 =
         0.02517    0.00608    0.00354    0.00445
O4    4    0.031643    0.753134    0.419931    11.00000    0.01904    0.02815 =
         0.03026    0.00156    0.00105    0.00632
O5    4   -0.116223    0.643448    0.477198    11.00000    0.01463    0.03512 =
         0.02767   -0.00341    0.00115    0.00381
O6    4   -0.130091    0.421108    0.332348    11.00000    0.01745    0.02443 =
         0.04337    0.00004   -0.00107   -0.00021
O7    4    0.013347    0.541785    0.237294    11.00000    0.01963    0.02563 =
         0.02955    0.00158   -0.00177    0.00160
O8    4   -0.113942    0.486567    0.192518    11.00000    0.03207    0.05751 =
         0.04341    0.00294   -0.01504   -0.00116
O9    4    0.056352    0.331301    0.173784    11.00000    0.01889    0.03583 =
         0.02928   -0.00808   -0.00139   -0.00890
H9    2    0.047679    0.321059    0.143072    11.00000    0.04275
O10   4    0.192289    0.209365    0.193033    11.00000    0.02151    0.02602 =
         0.03140    0.00274    0.00027   -0.00767
H10   2    0.144087    0.228533    0.194822    11.00000    0.04414
O11   4    0.421765    0.612274    0.247148    11.00000    0.02357    0.02056 =
         0.03117    0.00735    0.00566    0.00387
O12   4    0.303115    0.307476    0.330953    11.00000    0.01506    0.03400 =
         0.02753    0.00118    0.00148    0.00102
O13   4    0.408680    0.231114    0.385131    11.00000    0.02113    0.02546 =
         0.02317    0.00303    0.00350   -0.00040
O14   4    0.589603    0.373544    0.380629    11.00000    0.02283    0.02745 =
         0.02817   -0.00706    0.00017   -0.00094
O15   4    0.676493    0.250185    0.357467    11.00000    0.01811    0.02667 =
         0.03484   -0.00311   -0.00667    0.00325
N1    3    0.434744    0.523782    0.327484    11.00000    0.01279    0.01845 =
         0.02427    0.00117    0.00112    0.00212
H1B   2    0.461594    0.476888    0.344870    11.00000    0.03368
N2    3    0.456716    0.307753    0.306361    11.00000    0.01256    0.02053 =
         0.02259    0.00072    0.00092    0.00154
N3    3    0.542095    0.267976    0.314633    11.00000    0.01578    0.01818 =
         0.02628   -0.00162   -0.00278    0.00275
H3    2    0.550125    0.214376    0.302025    11.00000    0.02795
N4    3    0.184915    0.744774    0.360593    11.00000    0.02339    0.02068 =
         0.02727    0.00172    0.00190    0.00394
H4    2    0.123638    0.745450    0.380407    11.00000    0.03083
C1    1    0.334486    0.510231    0.410684    11.00000    0.01500    0.02161 =
         0.02080   -0.00282   -0.00390    0.00047
C2    1    0.361187    0.559649    0.361423    11.00000    0.01499    0.01913 =
         0.02281   -0.00226    0.00011   -0.00100
C3    1    0.312889    0.637737    0.347585    11.00000    0.01575    0.01919 =
         0.02232   -0.00027   -0.00089   -0.00035
AFIX  43
H3A   2    0.333869    0.674543    0.316402    11.00000   -1.20000
AFIX   0
C4    1    0.233969    0.662254    0.379184    11.00000    0.01628    0.01774 =
         0.02404    0.00099   -0.00331    0.00278
C5    1    0.116613    0.626624    0.459103    11.00000    0.01649    0.02448 =
         0.02323   -0.00118   -0.00115    0.00047
C6    1    0.092533    0.566909    0.505147    11.00000    0.01688    0.03173 =
         0.02179   -0.00143    0.00086    0.00124
C7    1    0.143147    0.494479    0.523147    11.00000    0.02062    0.03162 =
         0.02299    0.00505    0.00059    0.00117
C8    1    0.225881    0.476616    0.491283    11.00000    0.01946    0.02620 =
         0.02435    0.00107   -0.00416   -0.00068
C9    1    0.254201    0.534357    0.442419    11.00000    0.01589    0.02259 =
         0.02103   -0.00028   -0.00205    0.00008
C10   1    0.201111    0.611126    0.426282    11.00000    0.01326    0.02240 =
         0.02333   -0.00267   -0.00320    0.00149
C11   1    0.043857    0.687803    0.454345    11.00000    0.01893    0.02836 =
         0.02116   -0.00302   -0.00097    0.00247
C12   1   -0.028303    0.665010    0.501027    11.00000    0.01722    0.03235 =
         0.02391   -0.00130    0.00153    0.00388
C13   1   -0.042231    0.739878    0.544393    11.00000    0.02555    0.04547 =
         0.02862   -0.00998    0.00111    0.00135
AFIX 137
H13A  2   -0.091290    0.723344    0.572040    11.00000   -1.50000
H13B  2   -0.060182    0.794526    0.523570    11.00000   -1.50000
H13C  2    0.015732    0.750402    0.565743    11.00000   -1.50000
AFIX   0
C14   1    0.116039    0.436890    0.574242    11.00000    0.02498    0.04120 =
         0.03302    0.01242    0.00565    0.00414
AFIX 137
H14A  2    0.064622    0.465140    0.595373    11.00000   -1.50000
H14B  2    0.169277    0.430096    0.600543    11.00000   -1.50000
H14C  2    0.096543    0.377881    0.560128    11.00000   -1.50000
AFIX   0
C15   1    0.457390    0.548036    0.272462    11.00000    0.01409    0.01718 =
         0.02402   -0.00021   -0.00094   -0.00355
C16   1    0.530873    0.494402    0.241824    11.00000    0.01645    0.02077 =
         0.02367    0.00031    0.00137   -0.00102
C17   1    0.521897    0.406820    0.232082    11.00000    0.01623    0.02293 =
         0.02254   -0.00130    0.00369    0.00089
AFIX  43
H17   2    0.572488    0.378304    0.213035    11.00000   -1.20000
AFIX   0
C18   1    0.440406    0.347610    0.247868    11.00000    0.01449    0.01732 =
         0.02605    0.00050    0.00129    0.00073
AFIX  13
H18   2    0.382655    0.384697    0.249128    11.00000   -1.20000
AFIX   0
C19   1    0.429410    0.275309    0.202005    11.00000    0.02000    0.01810 =
         0.02098    0.00016    0.00054    0.00222
AFIX  43
H19   2    0.485034    0.247149    0.189381    11.00000   -1.20000
AFIX   0
C20   1    0.350934    0.246158    0.177038    11.00000    0.02301    0.01988 =
         0.02171    0.00247   -0.00058   -0.00245
C21   1    0.256290    0.283134    0.193320    11.00000    0.01766    0.02288 =
         0.02393    0.00037   -0.00080   -0.00241
AFIX  13
H21   2    0.260485    0.305339    0.234478    11.00000   -1.20000
AFIX   0
C22   1    0.221308    0.361738    0.155277    11.00000    0.01879    0.02280 =
         0.02589    0.00251   -0.00127   -0.00359
AFIX  13
H22   2    0.267810    0.411061    0.159226    11.00000   -1.20000
AFIX   0
C23   1    0.128223    0.398384    0.178161    11.00000    0.01593    0.02582 =
         0.02929   -0.00002   -0.00382   -0.00399
AFIX  13
H23   2    0.109981    0.451292    0.153974    11.00000   -1.20000
AFIX   0
C24   1    0.130414    0.426412    0.242694    11.00000    0.01591    0.02228 =
         0.03136   -0.00589   -0.00226    0.00056
AFIX  13
H24   2    0.148754    0.372497    0.265881    11.00000   -1.20000
AFIX   0
C25   1    0.034720    0.455960    0.264672    11.00000    0.01716    0.02205 =
         0.02704   -0.00186   -0.00322   -0.00099
AFIX  13
H25   2   -0.012682    0.410822    0.252392    11.00000   -1.20000
AFIX   0
C26   1    0.028139    0.470014    0.330855    11.00000    0.01605    0.02326 =
         0.02925   -0.00185   -0.00199    0.00139
AFIX  13
H26   2    0.069113    0.521596    0.341349    11.00000   -1.20000
AFIX   0
C27   1   -0.072364    0.495758    0.346538    11.00000    0.02036    0.01962 =
         0.02905    0.00198    0.00028    0.00092
AFIX  13
H27   2   -0.091193    0.547379    0.321363    11.00000   -1.20000
AFIX   0
C28   1   -0.080975    0.523874    0.409523    11.00000    0.02362    0.02477 =
         0.02807    0.00471    0.00067    0.00102
AFIX  43
H28   2   -0.062071    0.484530    0.439900    11.00000   -1.20000
AFIX   0
C29   1   -0.115144    0.603968    0.422291    11.00000    0.01662    0.02912 =
         0.02441    0.00226   -0.00086    0.00128
AFIX  43
H29   2   -0.141253    0.637338    0.390995    11.00000   -1.20000
AFIX   0
C30   1    0.609372    0.548604    0.216645    11.00000    0.01880    0.02344 =
         0.03410   -0.00065    0.00896   -0.00268
AFIX 137
H30A  2    0.585434    0.587968    0.185869    11.00000   -1.50000
H30B  2    0.656130    0.508265    0.200087    11.00000   -1.50000
H30C  2    0.637653    0.584861    0.247589    11.00000   -1.50000
AFIX   0
C31   1    0.353163    0.169209    0.134688    11.00000    0.02849    0.02225 =
         0.02834   -0.00329   -0.00019   -0.00246
AFIX 137
H31A  2    0.329498    0.189026    0.096662    11.00000   -1.50000
H31B  2    0.314277    0.120421    0.149529    11.00000   -1.50000
H31C  2    0.417165    0.148033    0.130272    11.00000   -1.50000
AFIX   0
C32   1    0.213485    0.340385    0.089867    11.00000    0.02436    0.02912 =
         0.02591    0.00425    0.00171   -0.00068
AFIX 137
H32A  2    0.274716    0.323904    0.074616    11.00000   -1.50000
H32B  2    0.190448    0.393160    0.068968    11.00000   -1.50000
H32C  2    0.170293    0.290451    0.084229    11.00000   -1.50000
AFIX   0
C33   1    0.203776    0.498111    0.253621    11.00000    0.01625    0.03162 =
         0.04900   -0.01340   -0.00162   -0.00193
AFIX 137
H33A  2    0.265539    0.473224    0.245982    11.00000   -1.50000
H33B  2    0.200174    0.518119    0.294360    11.00000   -1.50000
H33C  2    0.192747    0.549051    0.227540    11.00000   -1.50000
AFIX   0
C34   1    0.061607    0.387964    0.365377    11.00000    0.02993    0.03172 =
         0.03251    0.00279   -0.00052    0.00890
AFIX 137
H34A  2    0.029316    0.334422    0.351275    11.00000   -1.50000
H34B  2    0.048226    0.396552    0.407008    11.00000   -1.50000
H34C  2    0.128635    0.380565    0.359876    11.00000   -1.50000
AFIX   0
C35   1   -0.063431    0.547603    0.203745    11.00000    0.02166    0.04464 =
         0.02914    0.00333    0.00092    0.00671
C36   1   -0.076734    0.642102    0.183427    11.00000    0.05193    0.05009 =
         0.03419    0.00733    0.00060    0.02077
AFIX 137
H36A  2   -0.048489    0.683236    0.211664    11.00000   -1.50000
H36B  2   -0.143240    0.654958    0.180154    11.00000   -1.50000
H36C  2   -0.047170    0.649905    0.145178    11.00000   -1.50000
AFIX   0
C37   1   -0.221683    0.448667    0.317212    11.00000    0.01959    0.03463 =
         0.04607    0.00314   -0.00205   -0.00070
AFIX 137
H37A  2   -0.218573    0.494870    0.286864    11.00000   -1.50000
H37B  2   -0.252759    0.472932    0.351873    11.00000   -1.50000
H37C  2   -0.256711    0.397154    0.302489    11.00000   -1.50000
AFIX   0
C38   1    0.382148    0.283043    0.340634    11.00000    0.01546    0.02046 =
         0.02270   -0.00140   -0.00034   -0.00136
C39   1    0.334047    0.204281    0.424379    11.00000    0.02602    0.03121 =
         0.03161    0.00464    0.00971   -0.00265
AFIX  23
H39A  2    0.286019    0.170209    0.402861    11.00000   -1.20000
H39B  2    0.304661    0.257466    0.442376    11.00000   -1.20000
AFIX   0
C40   1    0.378597    0.146440    0.470539    11.00000    0.04139    0.04559 =
         0.03398    0.01449    0.01222   -0.00007
AFIX 137
H40A  2    0.408291    0.094756    0.451934    11.00000   -1.50000
H40B  2    0.331056    0.125623    0.498004    11.00000   -1.50000
H40C  2    0.425397    0.181346    0.491681    11.00000   -1.50000
AFIX   0
C41   1    0.601434    0.303997    0.354563    11.00000    0.01718    0.02234 =
         0.02160    0.00202    0.00084   -0.00164
C42   1    0.745317    0.268147    0.402485    11.00000    0.02321    0.03248 =
         0.03310    0.00107   -0.00991   -0.00097
AFIX  23
H42A  2    0.723807    0.245242    0.440772    11.00000   -1.20000
H42B  2    0.756471    0.333312    0.405970    11.00000   -1.20000
AFIX   0
C43   1    0.832664    0.220829    0.383912    11.00000    0.02079    0.03632 =
         0.04524    0.00537   -0.00471    0.00170
AFIX 137
H43A  2    0.854950    0.246452    0.347054    11.00000   -1.50000
H43B  2    0.819654    0.156992    0.378457    11.00000   -1.50000
H43C  2    0.880283    0.228221    0.414126    11.00000   -1.50000
AFIX   0
C44   1    0.235811    0.828013    0.377314    11.00000    0.02814    0.02215 =
         0.05210    0.00066    0.00087    0.00258
AFIX 137
H44A  2    0.249382    0.826793    0.419289    11.00000   -1.50000
H44B  2    0.197378    0.880351    0.368314    11.00000   -1.50000
H44C  2    0.294068    0.831514    0.355309    11.00000   -1.50000
AFIX   0
C45   1    0.158155    0.745654    0.297420    11.00000    0.03340    0.03774 =
         0.02754    0.00306   -0.00261    0.01534
AFIX 137
H45A  2    0.214278    0.745329    0.273207    11.00000   -1.50000
H45B  2    0.121901    0.799655    0.289050    11.00000   -1.50000
H45C  2    0.120753    0.692553    0.288607    11.00000   -1.50000
AFIX   0
CL1   5    0.679274    0.507729    0.491540    11.00000    0.04252    0.05367 =
         0.05667   -0.00808    0.00074   -0.00674
CL2   5    0.588784    0.342723    0.525519    11.00000    0.06020    0.05572 =
         0.03902    0.00505    0.00737    0.00102
CL3   5    0.498805    0.512499    0.547354    11.00000    0.05059    0.09108 =
         0.05239   -0.03400   -0.00008    0.02413
C46   1    0.572107    0.452909    0.499355    11.00000    0.03194    0.05098 =
         0.02925   -0.00861   -0.00218    0.00913
AFIX  13
H46   2    0.541523    0.449684    0.460165    11.00000   -1.20000

AFIX   0
HKLF 4


REM  p12063 in P2(1)2(1)2(1)
REM wR2 = 0.1135, GooF = S = 1.030, Restrained GooF = 1.030 for all data
REM R1 = 0.0422 for 9228 Fo > 4sig(Fo) and 0.0478 for all 10050 data
REM 650 parameters refined using 0 restraints

END

WGHT      0.0569      2.1816

REM Highest difference peak  0.653,  deepest hole -0.480,  1-sigma level  0.053
Q1    1   0.5114  0.5633  0.5220  11.00000  0.05    0.65
Q2    1   0.5380  0.3796  0.5312  11.00000  0.05    0.46
Q3    1   0.6827  0.4667  0.5184  11.00000  0.05    0.45
Q4    1  -0.1278  0.3799  0.3604  11.00000  0.05    0.25
Q5    1  -0.0380  0.7210  0.5133  11.00000  0.05    0.23
;
_shelx_res_checksum   86365

_shelx_hkl_file
;
   0   0   2   22.24    1.72
   0   0   3   -0.30    0.85
   0   0   4 1023.60   13.65
   0   0   5    0.98    1.43
   0   0   6 3334.62   30.41
   0   0   7   -0.39    1.41
   0   0   8   41.86    4.20
   0   0   9    2.72    1.76
   0   0  10   35.06    4.24
   0   0  11   -1.63    1.98
   0   0 -12 1419.72   43.60
   0   0 -13    3.89    6.09
   0   0 -14  151.63   16.54
   0   0 -15    0.11    5.13
   0   0 -16  386.16   27.13
   0   0 -17    0.07    4.74
   0   0  18  346.19    8.48
   0   0  18  358.38    9.80
   0   0 -18  361.71   27.67
   0   0  19   -1.04    1.54
   0   0  19   -0.02    1.26
   0   0 -19   -4.35    4.65
   0   0  20    0.76    1.70
   0   0  20    1.46    1.46
   0   0  21   -1.35    1.54
   0   0  21    0.13    1.65
   0   0  22    6.04    1.63
   0   0  22    8.98    2.41
   0   0  23    0.93    1.30
   0   0  23   -0.72    1.76
   0   0  24   79.57    4.85
   0   0  25    1.89    1.61
   0   0  26   53.82    3.50
   0   0  27    0.48    1.11
   0   0  28    0.41    0.80
   0  -1   1  168.23    4.63
   0  -1   2 1992.26   17.56
   0  -1  -2 2021.34   18.78
   0  -1   3    1.65    1.17
   0  -1   4   66.77    4.54
   0  -1   5  233.88    8.24
   0  -1   6 3044.42   30.89
   0  -1   7  859.15   17.52
   0   1   7  760.64   15.91
   0  -1   8   83.88    5.87
   0   1   8   78.64    5.59
   0  -1   9  102.46    6.80
   0  -1  -9  104.03   11.24
   0   1   9  101.40    6.50
   0  -1 -10  773.75   28.97
   0  -1  10  775.84   19.39
   0   1  10  776.53   18.41
   0   1  11   25.28    3.65
   0  -1  11   23.11    3.63
   0  -1 -11   32.56    8.67
   0  -1 -12  144.33   14.69
   0  -1 -13    7.82    6.50
   0   1 -13    4.91    6.96
   0   1 -14  105.31   13.82
   0  -1 -14  100.53   13.48
   0  -1 -15   92.62   13.30
   0   1 -15   82.49   12.69
   0   1 -16   95.12   14.48
   0  -1 -16   80.07   12.87
   0  -1 -17   26.10    7.82
   0   1 -17   24.19    8.32
   0  -1 -18   13.98    2.35
   0  -1  18   20.84    2.39
   0  -1  18   19.26    2.63
   0   1 -18   24.78    8.80
   0   1  18   24.58    2.39
   0   1  18   17.89    2.43
   0  -1 -18   22.65    8.46
   0  -1  19    2.54    1.50
   0  -1 -19   -1.04    5.69
   0   1  19    7.67    2.11
   0  -1 -19    1.59    1.56
   0   1  19    1.41    1.15
   0   1 -19    1.13    5.24
   0  -1  19    4.09    1.83
   0  -1 -20   59.66    4.50
   0  -1  20   59.40    4.54
   0  -1  20   62.21    4.09
   0   1  20   63.73    4.59
   0   1  20   60.25    3.74
   0   1  21   86.83    4.43
   0  -1 -21   84.12    5.22
   0  -1  21   85.66    5.41
   0   1  21   82.84    5.11
   0  -1  21   88.81    4.83
   0  -1 -22    9.19    2.20
   0  -1  22    7.56    2.04
   0  -1  22    8.46    2.35
   0   1  22    6.78    1.76
   0   1  22    7.15    2.09
   0   1  23   90.27    5.17
   0  -1  23   92.36    5.41
   0  -1  23   87.42    4.63
   0  -1  24   69.55    4.00
   0  -1  24   76.84    4.87
   0  -1  24   71.62    3.93
   0   1  24   76.88    4.61
   0   1  25   37.06    3.22
   0  -1  25   37.39    3.39
   0   1  26    5.91    1.54
   0  -1  26    6.41    1.85
   0  -1  27    4.85    1.39
   0   1  27    3.46    1.20
   0  -1  28   21.00    1.76
   0   1  28   12.78    1.24
   0  -2   0  655.90   12.17
   0  -2   1  603.86   10.67
   0  -2   1  555.70   11.30
   0  -2   1  594.86   12.13
   0  -2   2  371.44    9.82
   0  -2   2  383.25    8.41
   0  -2  -2  397.61    8.85
   0  -2  -3  863.98   15.17
   0  -2   3  854.15   15.56
   0  -2   3  822.07   12.50
   0  -2  -4 9999.00   59.93
   0  -2   4 9237.79   55.03
   0  -2   5 3037.90   35.93
   0  -2  -5 2473.07   34.19
   0  -2   6  330.82   11.91
   0  -2  -6  266.13   12.69
   0  -2   7   32.99    4.13
   0  -2  -7   29.71    5.61
   0  -2  -8  635.49   22.82
   0  -2   8  688.00   17.89
   0  -2   9  198.27   10.15
   0  -2  -9  192.19   13.80
   0   2   9  201.49    9.61
   0   2  10  322.21   12.39
   0  -2  10  304.15   13.00
   0  -2 -10  301.08   18.32
   0  -2 -11  490.10   24.37
   0  -2  11  517.79   17.58
   0   2  11  521.14   15.89
   0  -2  12 1347.75   28.78
   0  -2 -12 1340.55   41.69
   0  -2 -13   47.08    9.02
   0   2 -14   56.43   10.76
   0  -2 -14   54.49   10.02
   0   2 -15  171.17   17.67
   0  -2 -15  162.97   17.19
   0  -2 -16    5.24    4.63
   0   2 -16   14.69    7.37
   0  -2  17   71.53    4.37
   0  -2 -17   74.75   12.67
   0   2 -17   71.64   12.91
   0  -2 -18  255.31   23.65
   0  -2  18  224.42    7.98
   0  -2 -18  224.23    8.26
   0  -2  18  223.77    7.19
   0   2  18  229.49    7.72
   0   2 -18  239.59   22.52
   0  -2  19    2.52    1.76
   0   2 -19    1.98    5.98
   0   2  19    1.54    1.41
   0  -2 -19    3.30    1.93
   0  -2  19    4.67    1.74
   0  -2 -19    7.78    6.17
   0  -2 -20   13.58    2.65
   0  -2  20   13.72    2.54
   0   2  20   13.52    2.41
   0  -2  20   17.30    2.41
   0  -2 -21   -0.61    1.85
   0  -2  21   -0.09    1.59
   0   2  21   -1.17    1.74
   0  -2  21   -0.80    1.76
   0   2  22   53.62    4.09
   0  -2 -22   53.67    4.33
   0  -2  22   45.43    3.72
   0  -2  22   50.14    4.20
   0  -2  23    3.50    1.67
   0  -2 -23    0.33    1.74
   0   2  23    3.35    1.67
   0  -2  23    3.11    2.06
   0  -2  24   25.74    2.70
   0  -2  24   28.19    3.26
   0   2  24   29.02    3.04
   0  -2  25   29.65    3.09
   0  -2  25   27.50    2.46
   0   2  25   27.67    2.70
   0  -2  25   28.58    2.61
   0  -2  26   10.00    1.41
   0   2  26    8.89    1.63
   0  -2  26    9.72    1.93
   0   2  27    7.04    1.26
   0  -2  27    7.96    1.52
   0  -2  28    1.63    0.89
   0  -3   0    0.28    1.85
   0  -3   1    1.98    2.13
   0  -3   1    2.06    1.80
   0  -3   1    3.56    2.06
   0  -3   2  109.85    7.24
   0  -3   2   97.31    5.69
   0  -3   2  101.09    6.39
   0  -3   3    6.96    3.09
   0  -3   3    6.85    2.61
   0  -3  -3    7.39    2.11
   0  -3   3    6.24    2.00
   0  -3   4   54.25    5.22
   0  -3  -4   59.53    5.15
   0  -3   4   60.90    4.46
   0  -3   5  990.65   21.19
   0  -3  -5 1030.12   22.11
   0  -3   6    7.41    2.59
   0  -3  -6    7.11    3.41
   0  -3  -7  596.30   20.04
   0  -3   7  610.91   18.32
   0  -3   8    3.54    2.63
   0  -3  -8   -2.04    3.83
   0  -3   9   88.44    7.54
   0  -3  -9   78.23    9.24
   0  -3  10  212.99   11.85
   0  -3 -10  190.12   14.52
   0  -3 -11  104.55   11.78
   0  -3  11  106.29    8.43
   0   3  11  107.40    8.04
   0  -3 -12  196.86   16.56
   0  -3  12  191.97   11.56
   0  -3 -13    1.00    4.37
   0  -3 -14 1120.57   42.43
   0  -3 -15  287.72   22.87
   0   3 -15  256.37   22.00
   0   3 -16   32.41    9.22
   0  -3 -16   38.19    9.26
   0   3 -17    8.93    6.28
   0  -3 -17    8.02    6.50
   0  -3  17    3.83    1.37
   0  -3 -17   10.95    2.26
   0  -3  17    9.13    2.02
   0   3 -18  139.74   17.71
   0  -3  18  131.96    5.69
   0  -3 -18  135.96    6.69
   0   3  18  127.55    5.72
   0  -3 -18  146.22   18.08
   0  -3  18  130.11    6.15
   0  -3  19    3.96    1.74
   0   3 -19    2.63    4.48
   0  -3  19    1.78    1.59
   0  -3 -19    3.26    1.91
   0  -3 -19    4.02    4.61
   0   3  19    2.74    1.48
   0  -3 -20   60.01    4.80
   0   3  20   54.82    4.00
   0  -3  20   58.27    4.50
   0  -3  20   53.62    3.96
   0  -3  21    0.54    1.59
   0  -3  21   -0.98    1.98
   0   3  21    1.13    1.50
   0  -3 -21   -0.63    1.85
   0  -3  22   15.39    2.72
   0   3  22   18.34    2.48
   0  -3  22   14.28    2.41
   0  -3 -22   15.45    2.85
   0  -3  23   22.11    3.04
   0   3  23   22.39    2.63
   0  -3 -23   20.84    3.00
   0  -3  23   17.04    2.50
   0  -3  24   17.06    2.41
   0  -3  24   24.37    3.06
   0   3  24   25.04    2.63
   0   3  25   28.71    2.48
   0  -3  25   31.19    2.70
   0  -3  25   31.39    2.72
   0  -3  25   27.10    2.85
   0   3  26    2.41    1.07
   0  -3  26    2.11    1.02
   0  -3  26    2.11    1.41
   0  -3  27   21.37    2.06
   0  -3  27   15.95    1.37
   0  -3  28    7.59    1.13
   0  -4   0 3599.10   39.97
   0  -4   1  272.28   11.65
   0  -4   1  266.13   10.72
   0  -4   1  274.70   11.78
   0  -4   2  413.39   12.74
   0  -4   2  390.92   14.37
   0  -4   2  389.05   13.89
   0  -4   3  449.17   13.06
   0  -4   3  448.89   16.21
   0  -4   3  415.91   14.32
   0  -4  -4    3.09    2.26
   0  -4   4    1.37    1.70
   0  -4   4    1.80    2.39
   0  -4   4    2.96    3.06
   0  -4   5  249.72   11.87
   0  -4  -5  258.79   11.28
   0  -4   5  253.29   10.15
   0  -4   5  266.81   13.63
   0  -4   6    9.87    3.17
   0  -4  -6   14.76    3.83
   0  -4  -7  395.24   16.95
   0  -4   7  351.05   14.98
   0  -4   8  990.46   25.52
   0  -4  -8 1062.31   29.52
   0  -4  -9  824.74   27.95
   0  -4   9  833.98   23.95
   0  -4  10  375.51   16.80
   0  -4 -10  383.88   20.61
   0  -4 -11  406.09   22.43
   0  -4  11  390.11   17.45
   0  -4  12    4.00    2.59
   0  -4 -12    2.80    3.76
   0  -4 -13   51.67    9.56
   0  -4 -14   99.40   13.45
   0   4 -15   52.60   10.98
   0  -4 -15   37.76    9.02
   0   4 -16   62.23   11.50
   0  -4 -16   75.51   12.61
   0  -4  17   12.35    2.13
   0  -4 -17   12.91    2.63
   0   4 -17    4.72    5.11
   0  -4 -17   10.17    5.61
   0  -4  17    9.63    1.80
   0  -4  18   44.82    3.54
   0  -4  18   49.80    4.02
   0  -4 -18   48.78    4.33
   0  -4 -18   63.60   11.76
   0   4 -18   39.82    9.78
   0  -4  19   11.26    2.33
   0  -4 -19   13.04    2.83
   0  -4  19    9.74    2.09
   0  -4  20  327.91    9.24
   0  -4  20  333.60   10.04
   0  -4 -20  317.12   10.63
   0   4  20  312.84    8.80
   0  -4  21   34.99    3.54
   0  -4 -21   38.04    4.04
   0   4  21   42.28    3.37
   0  -4  21   30.71    3.20
   0  -4  22  101.20    5.65
   0   4  22  101.96    4.89
   0  -4  22  100.16    5.24
   0  -4 -22   99.55    6.00
   0   4  23   31.13    2.72
   0  -4  23   29.95    3.09
   0  -4  23   31.71    3.35
   0  -4 -23   33.15    3.72
   0  -4  24    0.78    1.61
   0  -4  24    0.52    1.61
   0  -4  25   36.02    3.04
   0  -4  25   40.60    3.00
   0  -4  26   -0.20    1.02
   0  -4  26    0.63    1.22
   0  -4  27    0.41    0.96
   0  -4  27    0.07    0.70
   0  -4  28   25.10    1.54
   0  -5   0    0.02    2.41
   0  -5   1  105.70    7.82
   0  -5  -1  104.66    8.54
   0  -5   2    2.20    3.00
   0  -5   2    0.52    2.22
   0  -5   2    4.56    3.37
   0  -5   3  612.93   20.80
   0  -5   3  636.77   17.67
   0  -5   3  606.99   20.00
   0  -5   4 1222.16   24.43
   0  -5   4 1188.16   29.78
   0  -5   4 1164.89   27.63
   0  -5   5  329.91   12.76
   0  -5   5  303.43   14.32
   0  -5   5  317.12   16.13
   0  -5   6   52.21    5.33
   0  -5  -6   46.69    5.63
   0  -5   6   40.93    5.59
   0  -5   6   48.41    7.28
   0  -5   7  120.66    9.69
   0  -5   7  123.09   11.52
   0  -5  -7  118.85    9.54
   0  -5   8  294.06   15.00
   0  -5   8  324.08   18.74
   0  -5  -8  332.56   16.54
   0  -5   9   43.06    6.06
   0  -5  -9   48.71    7.17
   0  -5   9   38.62    7.32
   0  -5 -10   38.62    7.04
   0  -5  10   37.36    5.80
   0  -5  11   25.63    5.28
   0  -5 -11   31.89    7.17
   0  -5 -12   51.41    9.19
   0  -5  12   53.93    7.11
   0  -5 -13  445.34   25.60
   0  -5 -14  438.00   26.67
   0  -5  15    3.15    3.65
   0  -5 -15   -3.02    4.63
   0   5 -15    4.28    5.74
   0   5 -16    5.54    4.83
   0  -5  16    0.24    1.26
   0  -5 -16    1.76    1.80
   0  -5 -16    2.15    3.54
   0  -5  16   -5.96    5.19
   0  -5  16    0.48    1.30
   0  -5  17  143.00    6.24
   0  -5  17  137.24    5.85
   0   5 -17  140.43   17.17
   0  -5  17  146.67   16.58
   0  -5 -17  139.80   16.50
   0  -5 -17  133.52    6.91
   0  -5 -18    3.02    2.26
   0  -5  18   -1.11    1.56
   0   5 -18    1.33    5.93
   0  -5  18    6.30    4.33
   0  -5  18   -0.26    1.61
   0  -5 -18   12.11    5.52
   0  -5  19   85.66    4.89
   0  -5  19   87.68    5.24
   0  -5 -19   88.01    5.93
   0  -5  20    1.35    1.74
   0  -5  20    0.11    1.78
   0  -5 -20    1.39    2.30
   0  -5  21    4.43    2.00
   0  -5 -21    4.43    2.24
   0  -5  21    4.46    1.83
   0  -5  22   87.20    5.02
   0  -5  22   84.73    4.74
   0  -5 -22   82.84    5.56
   0  -5  23    2.00    1.74
   0  -5  23   -1.43    1.76
   0  -5  24   65.10    3.83
   0  -5  24   62.88    3.93
   0  -5  25   36.54    2.76
   0  -5  25   40.52    3.02
   0  -5  26    1.96    1.04
   0  -5  26    1.98    1.11
   0  -5  27   11.93    1.37
   0  -5  27    7.91    1.00
   0  -6   0  337.32   15.87
   0  -6  -1    5.19    3.13
   0  -6   1    5.13    3.13
   0  -6  -2  719.93   24.32
   0  -6   2  683.74   20.98
   0  -6   3    2.85    2.80
   0  -6   3    4.02    3.72
   0  -6  -3    1.91    3.72
   0  -6   4  436.28   19.87
   0  -6   4  417.89   18.98
   0  -6   4  427.28   16.11
   0  -6   5   36.06    6.59
   0  -6   5   43.60    5.48
   0  -6   5   40.12    7.46
   0  -6   6  602.19   22.87
   0  -6   6  578.17   24.63
   0  -6   6  584.91   18.84
   0  -6   7 1542.04   41.69
   0  -6   7 1451.88   36.19
   0  -6   8  165.04   12.63
   0  -6   8  179.30   15.11
   0  -6   9   12.09    4.22
   0  -6   9   19.58    6.35
   0  -6  10    5.33    3.37
   0  -6  10    1.24    3.65
   0  -6 -10    2.13    3.24
   0  -6 -11   96.57   11.00
   0  -6  11   86.60    9.72
   0  -6  11   82.10   11.59
   0  -6  12    3.17    2.80
   0  -6  12   -0.43    3.74
   0  -6 -12    3.48    2.85
   0  -6 -13  272.09   20.02
   0  -6  13  247.37   20.78
   0  -6  14  211.03   19.54
   0  -6 -14  189.04   17.39
   0  -6  15   -3.15    4.41
   0   6 -15    3.02    5.22
   0  -6 -15   -0.43    1.87
   0  -6  15    1.76    1.28
   0  -6 -15   -3.63    4.11
   0  -6  16   28.73    7.46
   0  -6  16   23.84    2.65
   0  -6  16   18.45    2.39
   0  -6 -16   25.17    3.46
   0  -6 -16   36.91    8.74
   0   6 -16   23.74    7.54
   0  -6 -16   25.24    2.83
   0  -6 -17    6.02    2.28
   0  -6 -17   -1.39    3.76
   0  -6  17    9.02    1.98
   0   6 -17   12.80    5.09
   0  -6  17    3.11    4.04
   0  -6  17    9.59    1.98
   0  -6 -17   12.76    5.43
   0  -6 -17   11.02    2.22
   0  -6 -18    4.78    1.85
   0  -6 -18    5.56    2.43
   0  -6  18    4.09    1.83
   0  -6  18    3.50    1.63
   0  -6 -19   69.53    5.48
   0  -6 -19   69.27    4.35
   0  -6  19   72.90    4.61
   0  -6  19   77.42    4.85
   0  -6  20   15.08    2.46
   0  -6 -20   16.54    3.24
   0  -6  20   15.52    2.52
   0  -6 -21    0.33    2.15
   0  -6  21    3.02    1.98
   0  -6  21    0.24    1.61
   0  -6  22    6.89    2.15
   0  -6  22    3.65    1.78
   0  -6  23   12.82    2.15
   0  -6  23   15.63    2.41
   0  -6  24   -0.61    1.43
   0  -6  24    2.85    1.41
   0  -6  25   18.89    1.98
   0  -6  25   20.15    2.13
   0  -6  26   45.80    2.52
   0  -6  26   42.23    2.33
   0  -6  27   -0.07    0.59
   0  -7   0    0.28    2.98
   0  -7  -1   10.56    4.35
   0  -7   1    6.28    3.28
   0  -7   2   25.63    5.13
   0  -7  -2   25.45    6.02
   0  -7  -3   17.80    5.37
   0  -7   3   17.85    4.20
   0  -7   4  339.62   15.61
   0  -7  -4  355.51   20.32
   0  -7   5  689.70   22.13
   0  -7   5  635.16   26.91
   0  -7  -5  623.86   28.19
   0  -7   6  307.15   19.48
   0  -7   6  332.97   15.22
   0  -7   7  591.82   25.43
   0  -7   7  647.88   28.87
   0  -7   8  334.47   21.50
   0  -7   8  323.60   18.87
   0  -7   9  104.09   12.67
   0  -7   9   95.83   10.72
   0  -7  10  458.21   26.71
   0  -7  10  406.70   21.63
   0  -7  11   11.24    5.41
   0  -7  12   -1.07    3.48
   0  -7  13  144.33   16.45
   0  -7  14   12.61    1.93
   0  -7  14   11.30    5.93
   0  -7 -14   11.61    2.30
   0  -7  14    9.02    2.30
   0  -7 -14    8.98    2.43
   0  -7  15   15.89    2.17
   0  -7  15   15.11    6.54
   0  -7 -15   15.04    2.43
   0  -7 -15   13.43    2.72
   0  -7  15    7.85    1.70
   0  -7 -15    6.61    4.28
   0  -7 -16   69.90    4.69
   0  -7  16   58.88    3.98
   0  -7 -16   55.21   11.67
   0  -7  16   76.27    4.41
   0  -7  16   75.62   12.26
   0  -7 -16   65.69    5.13
   0  -7 -17  145.09    6.54
   0  -7  17  138.76    6.04
   0  -7  17  133.02    5.89
   0  -7 -17  130.81    7.19
   0  -7 -18   27.89    3.13
   0  -7  18   30.21    3.26
   0  -7 -18   23.15    3.63
   0  -7  18   24.10    2.74
   0  -7  19   96.64    5.22
   0  -7 -19   79.60    5.78
   0  -7 -19  100.16    5.19
   0  -7  19   84.40    4.83
   0  -7  20  126.22    5.69
   0  -7 -20  117.39    5.30
   0  -7  20  117.79    5.59
   0  -7  21   77.88    4.41
   0  -7  21   82.53    4.67
   0  -7  22   -1.22    1.78
   0  -7  22    2.02    1.43
   0  -7  23   91.36    4.41
   0  -7  23   81.68    4.00
   0  -7  24    0.87    1.02
   0  -7  24    2.65    1.41
   0  -7  25    9.54    1.30
   0  -7  25   10.28    1.59
   0  -7  26   35.23    2.02
   0  -7  26   27.60    1.74
   0  -8   0 1040.06   32.39
   0  -8   1  313.26   17.41
   0  -8  -1  291.24   18.06
   0  -8  -2  231.20   16.76
   0  -8   2  232.07   14.69
   0  -8   3    0.78    2.20
   0  -8  -3   -0.43    3.43
   0  -8   4   23.65    4.67
   0  -8  -4   25.34    6.61
   0  -8  -5   14.85    5.67
   0  -8   5   10.87    3.50
   0  -8  -6   -0.83    3.50
   0  -8  -7  488.56   28.19
   0  -8   7  502.05   27.08
   0  -8  -8   93.55   13.19
   0  -8   8   85.05   12.04
   0  -8  -9   98.16   14.24
   0  -8   9  127.46   14.61
   0  -8  10   57.60   10.28
   0  -8 -10   34.65    9.80
   0  -8 -11  165.84   19.06
   0  -8  11  203.53   19.21
   0  -8  12    7.09    5.15
   0  -8 -12   12.06    6.56
   0  -8  13   45.21    3.15
   0  -8  13   37.23    3.65
   0  -8 -13   41.36   10.65
   0  -8 -13   41.15    3.93
   0  -8  13   49.73   10.43
   0  -8 -13   42.56    3.80
   0  -8  14   57.03   11.59
   0  -8  14   50.80    4.46
   0  -8 -14   59.25    4.52
   0  -8 -14   54.67    4.56
   0  -8  14   51.64    3.54
   0  -8 -14   42.04   10.30
   0  -8 -15  129.00    6.41
   0  -8  15  124.42    5.48
   0  -8  15  140.17   16.98
   0  -8 -15  109.24    6.46
   0  -8 -16    1.41    1.91
   0  -8  16    0.24    1.50
   0  -8 -16    0.89    2.11
   0  -8 -17    3.20    2.02
   0  -8 -17    2.04    2.20
   0  -8  17    2.28    1.83
   0  -8 -18   38.97    3.65
   0  -8  18   35.69    3.11
   0  -8  18   38.19    3.41
   0  -8  19   -0.48    1.65
   0  -8  19    0.70    1.26
   0  -8 -19   -0.07    1.59
   0  -8 -20   84.66    4.61
   0  -8  20   88.25    4.76
   0  -8  20   85.36    4.43
   0  -8 -21   18.67    2.17
   0  -8  21   22.95    2.65
   0  -8  21   23.52    2.39
   0  -8  22    2.17    1.20
   0  -8  22    3.09    1.67
   0  -8  23   20.28    2.24
   0  -8  23   25.58    2.06
   0  -8  24    0.67    1.13
   0  -8  24    0.50    0.39
   0  -8  24    0.17    0.91
   0  -8  25    8.32    1.11
   0  -8  25   10.50    1.43
   0  -8  26    2.59    0.70
   0  -9   0    2.63    3.56
   0  -9   1  213.62   15.71
   0  -9  -1  231.25   17.28
   0  -9  -2   32.39    7.39
   0  -9   2   29.32    5.98
   0  -9   3   70.10    8.63
   0  -9  -3   64.66    9.91
   0  -9   4    0.63    2.28
   0  -9  -4    4.69    4.78
   0  -9  -5   12.15    5.52
   0  -9  -6    4.56    4.63
   0  -9  -7    1.48    3.91
   0  -9  -8   24.04    7.82
   0  -9  -9  369.75   27.13
   0  -9 -10    0.85    4.11
   0  -9  10   -1.63    4.87
   0  -9  11  114.96   15.39
   0  -9  11  114.61    5.67
   0  -9 -11  118.50    5.98
   0  -9 -11   99.70   15.48
   0  -9  12   87.75   13.54
   0  -9  12   80.92    4.09
   0  -9 -12   83.77    5.28
   0  -9  12   87.96    5.28
   0  -9  13   78.92    4.26
   0  -9  13   85.70    5.37
   0  -9 -13   87.23    5.33
   0  -9 -13   79.23   13.50
   0  -9  13   75.88   12.95
   0  -9  14  351.01   10.82
   0  -9 -14  360.62   10.69
   0  -9  14  348.12    8.78
   0  -9 -15   11.09    2.30
   0  -9  15   11.67    2.06
   0  -9 -16  160.45    7.24
   0  -9  16  148.46    6.04
   0  -9  17   31.71    3.04
   0  -9 -17   32.02    3.59
   0  -9  18    2.70    1.74
   0  -9 -18    3.15    1.93
   0  -9 -19   64.71    4.30
   0  -9  19   57.21    3.80
   0  -9  20    4.43    1.67
   0  -9 -20    6.91    1.89
   0  -9 -21    1.26    1.26
   0  -9  21   -0.63    1.37
   0  -9  22    7.82    1.70
   0  -9  22    5.39    1.39
   0  -9  23   30.45    2.26
   0  -9  23   28.04    2.04
   0  -9  24    0.87    0.67
   0  -9  25    6.76    1.02
   0 -10   0  148.28   14.28
   0 -10  -1   92.38   11.61
   0 -10   1   87.46   10.78
   0 -10   2    3.54    3.15
   0 -10  -2    6.50    4.50
   0 -10  -3    3.54    4.28
   0 -10   3    1.37    2.43
   0 -10  -4   84.01   12.19
   0 -10  -5   47.32    9.69
   0 -10  -6    5.80    3.80
   0 -10  -7   16.71    5.76
   0 -10  -8   55.97    4.09
   0 -10  -8   50.23   10.67
   0 -10   9    5.15    1.74
   0 -10  -9    2.83    3.80
   0 -10  -9    7.56    2.06
   0 -10  10    1.72    1.54
   0 -10 -10   -0.61    5.19
   0 -10 -10    2.54    1.72
   0 -10 -11   60.47   12.98
   0 -10 -11   59.69    4.74
   0 -10  11   56.45    4.33
   0 -10 -12   60.25    4.80
   0 -10  12   59.40    3.52
   0 -10  12   72.53    4.98
   0 -10  13  161.21    5.87
   0 -10 -13  161.93    7.54
   0 -10  13  176.97    7.74
   0 -10  14    0.65    1.41
   0 -10 -14    0.09    1.96
   0 -10  14    0.00    1.30
   0 -10  14    3.59    2.37
   0 -10  15   -0.17    1.20
   0 -10 -15    0.83    1.98
   0 -10  15    0.65    1.30
   0 -10 -16   78.62    5.35
   0 -10  16   72.73    4.22
   0 -10  17   -0.43    1.46
   0 -10 -17   -1.04    2.00
   0 -10 -18   15.02    2.70
   0 -10  18   14.54    2.15
   0 -10  18   13.91    2.11
   0 -10  19   20.87    2.20
   0 -10  19   26.19    2.59
   0 -10 -19   25.39    2.87
   0 -10  20   74.88    3.80
   0 -10  20   74.86    3.65
   0 -10 -20   76.12    4.09
   0 -10 -21    1.46    1.17
   0 -10  21    1.89    1.22
   0 -10  21    3.13    1.09
   0 -10  22   -0.02    1.00
   0 -10 -22    0.41    0.46
   0 -10  22    1.22    0.78
   0 -10  23    0.22    0.30
   0 -10  24    7.74    1.02
   0  10  24    8.50    1.15
   0 -11   0   -1.46    3.48
   0 -11  -1   15.02    5.89
   0 -11   1   14.91    5.46
   0 -11   2    5.91    3.06
   0 -11  -2    1.72    3.11
   0 -11  -3  182.49   18.02
   0 -11   4    4.63    1.50
   0 -11  -4    8.82    5.63
   0 -11  -5   23.17    2.74
   0 -11   5   25.00    2.72
   0 -11  -5   26.08    2.76
   0 -11  -5   27.47    8.43
   0 -11   5   20.95    2.61
   0 -11   6   34.95    2.87
   0 -11   6   33.21    2.96
   0 -11  -6   35.76    3.41
   0 -11  -6   34.63    3.06
   0 -11   6   27.15    3.02
   0 -11  -6   36.65    8.96
   0 -11  -7  331.75    9.98
   0 -11  -7  346.47   27.32
   0 -11   7  319.67    8.48
   0 -11  -7  335.99    8.96
   0 -11   7  357.42   10.00
   0 -11   8   25.93    3.17
   0 -11  -8   25.37    2.59
   0 -11  -8   26.95    3.26
   0 -11  -8   22.08    7.41
   0 -11   8   28.37    2.67
   0 -11  -9  104.51   15.69
   0 -11  -9  106.70    6.02
   0 -11   9  119.46    6.09
   0 -11  10    1.00    1.74
   0 -11 -10    1.61    1.93
   0 -11 -11   35.39    3.89
   0 -11  11   39.58    3.87
   0 -11  12    8.02    2.61
   0 -11 -12    3.85    2.33
   0 -11  13   60.47    4.09
   0 -11 -13   67.84    5.15
   0 -11  13   68.08    5.04
   0 -11 -14    5.76    2.39
   0 -11  14    6.85    1.61
   0 -11  14    5.26    1.59
   0 -11  14   11.98    2.89
   0 -11  15   20.26    2.28
   0 -11  15   16.71    2.20
   0 -11 -15   22.56    3.39
   0 -11  16   62.82    3.67
   0 -11 -16   67.36    4.89
   0 -11 -17   40.58    3.76
   0 -11  17   37.91    2.85
   0 -11 -18   55.77    3.96
   0 -11  18   50.80    3.11
   0 -11 -19    3.87    1.72
   0 -11  19    1.89    1.11
   0 -11  20   14.87    1.74
   0 -11 -20   16.13    2.04
   0 -11 -21    2.89    1.09
   0 -11  21    3.43    1.00
   0  11  23    9.39    1.15
   0 -11  23    4.02    0.76
   0 -12   0  245.35   19.63
   0 -12   0  240.62    7.02
   0 -12   0  225.29    8.11
   0 -12   0  238.92    7.85
   0 -12  -1   16.67    2.72
   0 -12   1   19.13    3.00
   0 -12  -1   16.85    2.04
   0 -12   1   16.17    2.65
   0 -12  -1   15.32    2.30
   0 -12  -1    9.41    4.91
   0 -12  -1   13.69    2.11
   0 -12   2  308.47    9.35
   0 -12   2  319.52    8.09
   0 -12  -2  332.27    8.24
   0 -12  -2  305.17    8.59
   0 -12  -2  316.73    9.63
   0 -12  -2  299.78   22.84
   0 -12   2  326.82    9.65
   0 -12  -2  324.67    8.61
   0 -12  -3   -0.59    1.22
   0 -12   3    3.76    1.83
   0 -12  -3    0.76    1.39
   0 -12   3    1.80    1.11
   0 -12  -3    0.93    1.26
   0 -12  -3    1.67    1.85
   0 -12  -3    5.48    4.28
   0 -12   3    0.67    1.61
   0 -12   4    5.11    1.80
   0 -12   4    9.22    2.02
   0 -12  -4   11.15    2.39
   0 -12   4    7.13    1.67
   0 -12  -4    7.63    1.96
   0 -12  -4   10.69    6.50
   0 -12   5  122.68    5.39
   0 -12  -5  153.63    6.63
   0 -12  -5  145.93    6.41
   0 -12   5  158.00    6.87
   0 -12   5  132.94    6.02
   0 -12   6   70.51    4.72
   0 -12   6   82.42    4.50
   0 -12  -6   92.09    5.06
   0 -12   6   89.18    4.89
   0 -12  -6   82.88    5.15
   0 -12  -7   76.66    4.52
   0 -12   7   75.84    4.50
   0 -12  -7   76.75    5.15
   0 -12   7   75.84    4.93
   0 -12  -8  141.54    6.93
   0 -12  -8  149.13    6.09
   0 -12   8  148.13    5.93
   0 -12   8  145.13    6.83
   0 -12  -9  224.42    7.22
   0 -12   9  227.16    7.02
   0 -12   9  211.03    8.22
   0 -12  -9  212.23    8.46
   0 -12  10    1.26    1.83
   0 -12  10   -2.15    2.13
   0 -12 -10    2.13    2.20
   0 -12  11  176.26    7.67
   0 -12  11  169.76    7.02
   0 -12 -11  168.08    7.80
   0 -12  12   53.19    4.04
   0 -12 -12   50.54    4.59
   0 -12  12   62.16    4.85
   0 -12  13   48.25    3.74
   0 -12  13   49.12    4.37
   0 -12 -13   49.10    4.48
   0 -12 -14    3.39    2.26
   0 -12  14    2.48    1.48
   0 -12  14    3.56    2.22
   0 -12 -15    5.22    2.35
   0 -12  15    3.33    1.54
   0 -12  16    3.04    1.24
   0 -12 -16    1.37    1.89
   0 -12 -17   11.85    2.35
   0 -12  18    1.24    0.74
   0 -12 -18   20.06    2.48
   0 -12  19    0.43    0.46
   0 -12 -19    7.82    1.72
   0 -12 -20    1.93    1.07
   0  12  21   16.32    1.63
   0 -12 -21   12.02    1.17
   0  12  22    4.13    0.74
   0 -13   0    1.11    1.91
   0 -13   0   -0.59    1.13
   0 -13   0   -2.02    1.72
   0 -13  -1  259.50    7.91
   0 -13  -1  277.37    8.46
   0 -13  -1  260.92    9.02
   0 -13   1  275.78    9.06
   0 -13   1  262.42    7.54
   0 -13  -1  281.13    7.76
   0 -13   1  278.74    8.89
   0 -13   1  241.88    8.72
   0 -13   2  159.58    6.06
   0 -13  -2  151.52    6.22
   0 -13   2  153.02    6.87
   0 -13   2  155.15    6.87
   0 -13  -2  166.43    6.00
   0 -13   2  143.63    6.80
   0 -13  -2  155.00    6.33
   0 -13  -2  160.91    7.17
   0 -13  -3   42.73    3.28
   0 -13  -3   38.84    3.83
   0 -13   3   36.12    3.63
   0 -13  -3   36.84    3.00
   0 -13   3   39.97    3.30
   0 -13  -3   40.75    3.56
   0 -13   3   45.93    3.98
   0 -13   3   40.28    3.80
   0 -13   4   61.38    3.98
   0 -13  -4   65.66    4.50
   0 -13  -4   66.60    4.72
   0 -13   4   65.10    4.63
   0 -13  -4   67.51    3.98
   0 -13   4   57.75    4.56
   0 -13   4   69.16    4.74
   0 -13  -5   70.86    4.74
   0 -13   5   70.08    4.83
   0 -13  -5   66.55    4.02
   0 -13   5   69.79    4.65
   0 -13   5   72.81    4.98
   0 -13   5   61.14    3.96
   0 -13  -5   67.14    4.72
   0 -13   6  103.48    5.91
   0 -13  -6  116.26    5.22
   0 -13  -6  115.66    5.85
   0 -13  -6  113.87    6.06
   0 -13   6  117.96    5.83
   0 -13   6  116.07    6.09
   0 -13   7  170.58    7.46
   0 -13   7  205.23    8.00
   0 -13  -7  189.60    7.22
   0 -13  -7  177.67    7.65
   0 -13   7  187.99    7.00
   0 -13  -8   21.52    3.11
   0 -13  -8   21.58    2.70
   0 -13   8   26.43    3.26
   0 -13   8   23.45    3.13
   0 -13   8   19.93    2.54
   0 -13   9   14.37    2.72
   0 -13  -9    8.69    2.54
   0 -13   9    6.63    2.11
   0 -13  10   23.84    3.24
   0 -13 -10   21.02    3.28
   0 -13  10   21.58    3.02
   0 -13 -11   20.17    3.24
   0 -13  11   26.28    3.28
   0 -13  11   24.84    2.96
   0 -13  12    4.76    1.89
   0 -13 -12    5.46    2.41
   0 -13  12    4.52    2.26
   0 -13 -13    1.13    2.11
   0 -13  13    0.11    1.98
   0 -13  13   -1.22    1.61
   0 -13  14   10.59    1.96
   0 -13 -14   12.28    2.70
   0 -13  15    3.89    1.41
   0 -13 -15    1.43    1.96
   0 -13 -16    6.41    1.98
   0 -13  16    7.13    1.37
   0 -13 -17   41.12    3.20
   0  13  17   40.34    2.89
   0  13  18   15.30    1.83
   0 -13 -18   15.71    2.04
   0  13  19   54.08    2.74
   0 -13 -19   51.14    2.76
   0 -13 -20    0.20    0.63
   0  13  20    0.57    0.54
   0 -14   0   -0.20    2.04
   0 -14   0    1.24    1.11
   0 -14   0    1.00    1.67
   0 -14   0   -3.11    2.24
   0 -14   1   41.56    3.98
   0 -14  -1   48.91    3.37
   0 -14   1   41.75    3.67
   0 -14   1   47.28    3.28
   0 -14   1   40.58    3.76
   0 -14  -1   45.84    3.70
   0 -14  -1   41.99    3.26
   0 -14  -1   43.60    4.11
   0 -14  -2   38.23    3.30
   0 -14   2   35.84    2.96
   0 -14  -2   36.99    2.98
   0 -14   2   38.02    3.74
   0 -14   2   34.82    3.59
   0 -14   2   34.36    3.72
   0 -14  -2   33.56    3.76
   0 -14  -2   34.39    3.22
   0 -14   3   98.77    5.65
   0 -14  -3  103.46    4.76
   0 -14  -3  108.96    4.98
   0 -14   3  104.18    5.83
   0 -14  -3  109.44    5.46
   0 -14  -3  108.44    6.00
   0 -14   3  113.33    6.06
   0 -14   3   99.90    4.80
   0 -14   4   54.99    4.67
   0 -14  -4   53.43    4.00
   0 -14   4   46.64    4.15
   0 -14   4   53.62    4.26
   0 -14  -4   56.27    4.41
   0 -14   4   51.77    3.59
   0 -14   5  139.15    6.37
   0 -14  -5  136.17    6.48
   0 -14   5  123.42    6.41
   0 -14   5  137.96    6.61
   0 -14  -5  130.98    6.24
   0 -14   6   40.04    3.89
   0 -14   6   43.47    3.65
   0 -14   6   45.43    4.06
   0 -14  -6   40.52    3.78
   0 -14  -6   44.95    3.87
   0 -14  -7    5.65    2.17
   0 -14   7    4.78    2.06
   0 -14   7    5.59    1.93
   0 -14   7    9.17    2.46
   0 -14  -8    8.91    2.48
   0 -14   8    7.39    2.30
   0 -14   8    7.96    2.35
   0 -14  -9   10.80    2.52
   0 -14   9   13.02    2.70
   0 -14   9   11.41    2.54
   0 -14  10    1.07    1.89
   0 -14 -10    2.52    2.02
   0 -14  10    5.22    2.15
   0 -14 -11   84.88    5.24
   0 -14  11   86.23    5.26
   0 -14  11   90.14    4.98
   0 -14  12    6.50    2.20
   0 -14 -12    6.06    2.46
   0 -14  12    8.24    1.89
   0  14  12    5.06    1.35
   0 -14  13    6.61    1.78
   0  14  13    6.37    1.52
   0 -14  13    4.85    2.06
   0 -14 -13    6.41    2.20
   0  14  14    6.17    1.41
   0 -14  14    5.59    1.50
   0 -14 -14    6.35    2.09
   0  14  15   15.06    1.80
   0 -14  15   19.48    1.91
   0 -14 -15   17.26    2.50
   0 -14  16   10.63    1.30
   0 -14 -16   13.50    2.02
   0  14  16    9.61    1.43
   0  14  17   36.89    2.15
   0 -14 -17   42.86    2.76
   0 -14 -18   11.17    1.48
   0  14  18    8.41    0.98
   0 -15   0    0.20    1.98
   0 -15   0   -1.13    1.59
   0 -15   0   -0.93    1.80
   0 -15  -1    1.20    1.85
   0 -15   1    0.54    1.85
   0 -15  -1    0.33    1.50
   0 -15   1   -0.65    1.85
   0 -15   1   -0.24    1.78
   0 -15  -1   -1.96    1.96
   0 -15   2   26.93    3.24
   0 -15  -2   25.97    2.67
   0 -15  -2   29.43    2.80
   0 -15   2   27.73    3.17
   0 -15  -2   26.06    3.39
   0 -15  -2   25.00    3.11
   0 -15   2   27.80    3.28
   0 -15   3   26.00    3.20
   0 -15  -3   40.30    3.85
   0 -15  -3   31.56    2.93
   0 -15   3   28.76    3.33
   0 -15   3   28.45    3.33
   0 -15  -3   31.00    3.43
   0 -15  -4    9.95    2.04
   0 -15   4   13.00    2.46
   0 -15   4    8.11    2.22
   0 -15   4    7.80    2.24
   0 -15   5   20.74    3.06
   0 -15   5   21.43    3.15
   0 -15  -5   19.74    2.65
   0 -15  -6    1.78    1.63
   0 -15   6   -1.96    2.13
   0 -15   6    2.00    2.24
   0 -15  -7   26.13    2.98
   0 -15   7   22.00    2.89
   0 -15   7   25.04    3.06
   0 -15   8    8.50    2.30
   0 -15  -8   10.41    2.37
   0 -15   8   10.78    2.48
   0 -15   9   39.75    3.56
   0 -15  -9   38.95    3.50
   0 -15   9   42.49    3.65
   0 -15 -10   36.91    3.35
   0 -15  10   44.75    3.59
   0 -15  10   35.54    3.41
   0 -15  11    1.52    1.74
   0 -15  11    0.17    1.46
   0 -15 -11   -0.80    1.72
   0 -15  12   17.82    2.48
   0 -15  12   17.28    2.15
   0 -15 -12   18.32    2.54
   0 -15  13    0.09    1.13
   0 -15 -13   -2.00    1.61
   0 -15 -14    1.37    1.37
   0 -15  14    2.11    1.02
   0 -15 -15    2.04    1.30
   0 -15 -16   -1.09    1.04
   0 -15 -17    1.41    0.83
   0 -16   0    4.28    1.93
   0 -16   0    7.78    1.74
   0 -16  -1   35.52    3.41
   0 -16   1   32.26    3.02
   0 -16  -1   35.26    2.80
   0 -16   1   35.43    3.41
   0 -16   2    0.59    1.54
   0 -16  -2    0.00    1.74
   0 -16   2    0.91    1.63
   0 -16  -3   41.62    3.00
   0 -16   3   42.30    3.54
   0 -16   3   41.21    3.39
   0 -16  -3   42.69    3.59
   0 -16   4   27.60    3.02
   0 -16   4   33.43    3.24
   0 -16  -4   29.32    3.04
   0 -16  -4   26.63    2.50
   0 -16  -5    8.22    1.93
   0 -16   5    6.65    1.93
   0 -16   5    7.06    2.09
   0 -16  -5    5.46    1.61
   0 -16  -6    5.65    1.72
   0 -16   6    2.74    1.74
   0 -16   6    3.93    1.76
   0 -16  -6    1.52    1.54
   0 -16   7   58.99    3.96
   0 -16  -7   54.30    3.52
   0 -16  -7   59.53    3.91
   0 -16   7   60.10    3.93
   0 -16  -8   -0.52    1.48
   0 -16   8    2.41    1.65
   0 -16   8    1.11    1.61
   0 -16   9   58.08    3.83
   0 -16  -9   55.99    3.54
   0 -16   9   62.90    3.85
   0 -16 -10   56.43    3.46
   0 -16  10   58.03    3.43
   0 -16  10   54.12    3.50
   0 -16  11   33.19    2.56
   0 -16 -11   30.54    2.56
   0 -16  12   -0.67    1.00
   0 -16 -12    1.46    1.28
   0 -16 -13   29.52    2.35
   0 -16 -14   20.41    1.52
   0 -16 -14   48.49    2.50
   0 -16 -15    1.04    0.72
   0 -17   0    0.63    1.41
   0 -17   1   16.15    2.24
   0 -17  -1   17.39    2.24
   0 -17  -2    6.33    1.74
   0 -17   2    6.65    1.76
   0 -17   2    6.02    1.59
   0 -17  -3   42.65    3.09
   0 -17   3   44.23    3.04
   0 -17   3   41.54    3.09
   0 -17   4    6.98    1.70
   0 -17   4    6.13    1.61
   0 -17  -4    6.06    1.59
   0 -17  -5   15.52    1.67
   0 -17   5   15.06    2.11
   0 -17   5   13.32    2.00
   0 -17  -5   14.35    1.98
   0 -17  -6    0.61    0.93
   0 -17   6   -0.28    1.28
   0 -17  -6   -1.33    1.35
   0 -17   6    0.61    1.28
   0 -17  -7    1.09    1.02
   0 -17  -7    0.72    1.13
   0 -17   7    0.41    1.20
   0 -17   7    3.06    1.37
   0 -17  -8   -0.57    1.17
   0 -17  -8    1.11    1.02
   0 -17   8    1.13    1.26
   0 -17   8   -0.41    1.11
   0 -17  -9    3.41    1.13
   0 -17   9    6.30    1.46
   0 -17   9    7.09    1.46
   0 -17  -9    5.46    1.22
   0 -17 -10    9.37    1.33
   0 -17 -10   11.24    1.39
   0 -17 -11    5.63    1.02
   0 -17 -11    4.00    0.85
   0 -18   0   24.17    2.02
   0 -18   1    7.96    1.37
   0 -18  -1    9.30    1.50
   0 -18  -2    3.72    1.20
   0 -18   2    1.09    0.96
   0 -18  -3    0.76    0.98
   0 -18   3   -0.28    0.93
   0 -18  -4    4.87    1.13
   0 -18   4    3.78    1.09
   0 -18  -5    7.22    1.20
   0 -18   5    7.96    1.30
   0 -18   6   64.51    2.78
   0 -18  -6   58.01    2.48
   0 -18   7    1.48    0.83
   0 -18  -7    1.37    0.63
  -1   0  -1   10.95    1.37
  -1   0  -1   10.95    1.30
  -1   0  -2    1.35    0.63
  -1   0  -2    1.61    1.28
  -1   0   2    2.20    1.22
  -1   0  -2    1.72    0.91
  -1   0  -3  394.72   10.67
  -1   0   3  391.27    9.85
  -1   0  -3  416.13    8.17
   1   0   4  352.62    5.06
  -1   0   4  513.33   12.22
  -1   0   4  364.36    5.65
  -1   0  -4  527.96    9.63
  -1   0  -4  488.60   13.72
  -1   0  -5   45.45    5.76
  -1   0   5   53.69    4.65
  -1   0  -6  168.34   10.52
   1   0   6  173.04    5.11
  -1   0   6  172.23    8.24
  -1   0  -7 1095.92   27.93
   1   0   7 1134.28   14.45
  -1   0   8    9.50    2.72
   1   0   8    7.30    1.48
  -1   0  -8    5.96    5.04
   1   0   9   77.79    4.46
  -1   0  -9   87.49   10.41
  -1   0   9   75.75    6.65
  -1   0 -10  100.03   11.85
  -1   0  10   99.79    7.87
  -1   0  11   10.52    3.35
  -1   0 -11    6.37    6.13
  -1   0 -12  466.51   25.52
  -1   0  12  482.40   18.04
  -1   0 -13   11.30    5.52
  -1   0 -14  134.96   15.06
   1   0 -14  138.80   15.71
   1   0 -15    7.26    6.63
  -1   0 -15   -2.04    5.24
   1   0 -16    5.67    6.17
  -1   0 -16    8.52    5.63
   1   0 -17  100.46   14.74
  -1   0 -17   94.51   14.82
  -1   0  18   14.37    2.06
   1   0 -18    8.80    4.87
   1   0  18   12.98    1.93
  -1   0 -18   23.02    9.24
   1   0  18   13.78    2.35
  -1   0  18   14.67    2.37
  -1   0 -18   15.56    2.41
   1   0 -19   26.08    8.37
   1   0  19   25.26    2.98
  -1   0  19   28.73    2.80
  -1   0  19   26.60    3.13
   1   0  19   29.82    2.72
  -1   0 -19   22.32    2.74
  -1   0 -19   27.60    8.54
  -1   0  20    6.61    2.00
  -1   0  20    1.70    1.43
   1   0  20    3.24    1.48
  -1   0 -20    2.89    1.91
   1   0  20    4.37    1.91
   1   0  21   34.99    3.59
   1   0  21   28.71    2.85
  -1   0  21   32.84    3.06
  -1   0 -21   34.47    3.48
  -1   0  21   36.80    3.63
   1   0  22  124.46    5.30
  -1   0  22  128.33    5.61
   1   0  22  134.13    6.46
  -1   0  22  128.87    6.37
  -1   0  22  130.59    5.61
   1   0  23    1.30    1.30
  -1   0  23   -2.46    1.98
  -1   0  23    0.35    1.26
   1   0  23    0.87    1.72
   1   0  24   38.67    2.85
   1   0  24   37.49    3.52
  -1   0  24   35.08    3.43
  -1   0  25   20.19    2.65
   1   0  25   21.15    2.70
  -1   0  26    0.33    1.43
   1   0  26    1.26    1.37
   1   0  27    3.28    1.30
  -1   0  27    2.24    1.26
   1   0  28    4.15    0.98
  -1   0  28    3.35    0.96
   1  -1  28   49.47    2.48
  -1   1  28   32.26    1.83
   1  -1  27   -0.26    1.22
  -1   1  27   -0.30    1.00
  -1   1  26    1.00    1.28
   1  -1  26    1.11    1.43
   1  -1  25    8.26    2.02
  -1   1  25    7.00    1.87
  -1   1  24   24.69    2.96
  -1  -1 -24   20.98    2.61
   1  -1  24   18.80    2.28
   1  -1  24   25.10    3.06
  -1   1  23   25.15    3.09
   1  -1  23   24.34    3.17
   1  -1  23   22.76    2.59
  -1  -1 -23   26.43    3.06
   1  -1  22    3.37    1.56
  -1   1  22    7.67    2.13
  -1  -1 -22    9.39    2.39
   1  -1  22    7.46    2.22
  -1  -1 -21   32.45    3.61
   1  -1  21   30.91    3.50
  -1   1  21   31.76    2.91
  -1   1  21   32.17    3.46
   1  -1  21   33.86    3.15
   1  -1  20    9.69    1.96
   1  -1  20    8.06    2.09
  -1  -1 -20    4.63    2.02
  -1   1  20    5.85    1.70
  -1   1  20    5.22    1.93
   1  -1  19   13.41    2.35
  -1   1  19   17.56    2.56
  -1  -1 -19   15.11    2.67
  -1   1  19   15.04    2.13
  -1  -1 -19   22.74    8.63
   1   1 -19   21.52    8.39
   1  -1  19   16.67    2.30
  -1   1  18   -0.20    1.50
  -1   1  18   -0.35    1.26
   1   1 -18   -1.50    5.35
  -1  -1 -18   -0.98    1.80
   1  -1  18    0.35    1.22
   1  -1  18   -0.39    1.43
   1   1 -17   77.18   13.02
  -1  -1 -17   83.64   13.58
   1   1 -16   21.69    8.46
  -1  -1 -16   18.78    6.85
   1   1 -15   84.97   13.08
  -1  -1 -15   97.96   14.02
  -1  -1 -14   57.95   10.61
  -1  -1 -13  825.02   35.13
  -1   1  12  360.94   15.50
  -1  -1 -12  361.40   22.39
  -1  -1 -11   11.48    6.00
  -1   1  11   18.32    4.02
   1  -1  10 1217.07   19.93
  -1  -1 -10 1215.73   36.06
  -1   1   9  429.02   15.26
  -1  -1  -9  391.48   19.48
   1  -1   9  413.65   11.22
   1  -1   8  121.72    5.91
  -1  -1  -8  108.40   10.24
  -1   1   8  118.66    7.78
   1  -1   7 1315.60   17.98
  -1   1   7 1336.01   24.37
   1  -1   6  981.67   14.56
  -1  -1  -6  929.64   23.52
  -1  -1  -5  338.06   12.95
   1  -1   5  352.10    7.98
  -1  -1  -4   19.34    3.52
   1  -1   4   17.69    1.83
  -1  -1  -3  748.82   15.04
   1  -1   3  938.66   11.74
  -1  -1  -2 1677.57   19.28
  -1  -1  -1  217.34    5.00
  -1  -1   0  769.84   10.61
  -1  -1   1  269.83    6.26
  -1  -1   1  269.57    7.15
  -1   1  -1  264.46    4.87
  -1   1  -2 1882.23   18.21
  -1  -1   2 1881.71   20.93
  -1  -1   2 1856.47   18.15
  -1  -1   3  657.18   13.56
  -1  -1   4   39.56    4.09
  -1  -1   5  387.01   12.00
  -1   1  -5  413.11    8.87
  -1  -1   6 1060.40   21.15
   1   1   6 1032.10   12.82
   1   1   7 1372.46   16.00
  -1  -1   7 1352.31   25.39
  -1  -1   8   89.36    7.13
   1   1   8   89.16    4.46
  -1  -1   9  466.41   16.48
  -1   1  -9  458.12   20.95
   1   1   9  439.76   10.30
  -1   1 -10 1255.89   36.71
  -1  -1  10 1308.52   28.41
  -1  -1  11   11.00    3.52
  -1   1 -11   23.63    8.02
  -1   1 -12  321.54   21.00
  -1  -1  12  347.45   15.78
  -1   1 -13  809.83   34.78
  -1  -1  13  850.04   25.39
   1  -1 -13  788.75   34.19
   1  -1 -14   53.17   10.28
  -1   1 -14   51.77    9.74
   1  -1 -15   75.58   12.26
  -1   1 -15   68.88   11.41
  -1   1 -16   17.15    6.37
   1  -1 -16   17.06    7.54
  -1   1 -17   81.12   13.87
   1  -1 -17   79.99   13.48
  -1   1 -18    2.41    5.46
   1   1  18   -0.87    1.43
  -1  -1  18    2.24    1.48
   1  -1 -18    0.46    5.19
  -1  -1  18   -0.48    1.41
   1  -1 -19   24.15    8.11
   1   1  19   16.41    2.46
  -1  -1  19   17.37    2.37
  -1  -1  19   18.45    2.72
  -1  -1  20    5.76    2.04
  -1  -1  20    9.26    2.04
   1   1  20    6.67    2.02
  -1  -1  21   30.50    3.52
   1   1  21   30.39    3.37
  -1  -1  21   31.91    3.04
  -1  -1  22    6.35    2.13
   1   1  22    7.15    2.04
  -1  -1  22    5.11    1.85
   1   1  23   24.10    3.06
  -1  -1  23   24.28    3.15
  -1  -1  23   24.63    2.78
  -1  -1  23   22.89    2.70
  -1  -1  24   25.58    3.11
   1   1  24   25.52    3.02
  -1  -1  24   26.06    2.67
   1   1  25    6.72    1.85
  -1  -1  25    5.61    1.41
  -1  -1  25    6.63    1.93
  -1  -1  26    1.74    1.50
   1   1  26   -0.09    1.26
   1   1  27   -0.07    0.98
  -1  -1  27    0.46    1.13
  -1  -1  28   50.08    2.52
   1   1  28   35.52    1.87
   1  -2  28    4.98    1.09
  -1   2  27   30.10    2.09
   1  -2  27   33.34    2.52
   1  -2  26   76.18    4.11
  -1   2  26   76.23    3.70
   1  -2  25    0.67    1.67
   1  -2  25    1.76    1.22
  -1   2  25    0.37    1.28
   1  -2  25    1.00    1.37
   1  -2  24    7.04    2.24
   1  -2  24    6.54    1.67
  -1  -2 -24    9.95    2.24
  -1   2  24    7.91    1.80
   1  -2  23    9.04    2.37
   1  -2  23    7.09    1.89
  -1  -2 -23   11.56    2.52
  -1   2  23    9.48    2.17
  -1  -2 -22   49.62    4.35
  -1   2  22   56.62    4.22
   1  -2  22   56.03    3.91
   1  -2  22   52.93    4.37
  -1   2  21   52.43    4.11
  -1  -2 -21   48.82    4.50
   1  -2  21   46.01    3.61
   1  -2  21   46.73    4.17
   1  -2  20  114.61    6.02
   1  -2  20  106.09    5.28
  -1   2  20  104.29    5.56
  -1  -2 -20  108.74    6.33
  -1  -2 -19  109.77    6.30
   1   2 -19  106.61   16.06
   1  -2  19  100.11    5.02
  -1   2  19  101.20    5.41
   1  -2  19  101.55    5.65
  -1  -2 -19  111.87   16.54
  -1   2  18   61.64    4.15
  -1  -2 -18   70.92   13.28
   1  -2  18   61.12    4.30
   1  -2  18   59.97    3.78
  -1  -2 -18   59.71    4.56
   1   2 -18   66.14   12.61
   1   2 -17  107.09   15.48
  -1  -2 -17  101.46   15.24
   1   2 -16    9.11    6.19
  -1  -2 -16    3.89    5.43
  -1  -2 -15  675.92   35.26
  -1  -2 -14  165.58   17.19
  -1  -2 -13  127.15   14.50
  -1   2  12  112.98    8.91
  -1  -2 -12  113.81   13.39
  -1  -2 -11  100.83   12.11
  -1   2  11  100.64    8.39
   1  -2  10  454.23   13.58
  -1  -2 -10  435.22   22.08
  -1   2  10  490.90   17.39
  -1  -2  -9  237.81   15.43
   1  -2   9  246.24    9.67
  -1   2   9  250.85   12.15
  -1  -2  -8  448.32   19.41
   1  -2   8  451.84   12.85
  -1  -2  -7  332.21   15.61
   1  -2   7  380.51   11.95
   1  -2   6   88.36    5.74
  -1  -2  -6   59.95    6.69
  -1  -2  -5  386.46   14.37
   1  -2   5  606.08   12.78
   1  -2   4 2253.43   23.69
  -1  -2  -4 1895.19   28.21
   1  -2   3  544.37   11.59
  -1  -2  -3  582.04   13.93
   1  -2   2 2274.48   16.19
  -1  -2  -1 2088.33   21.30
   1  -2   0 1290.63   16.00
  -1  -2   0 1237.40   17.76
  -1  -2   1 2163.95   24.71
   1  -2  -1 2233.44   11.82
  -1  -2   2 2265.74   24.74
  -1  -2   2 2296.43   27.02
  -1  -2   2 2291.12   25.47
  -1  -2   3  608.47   13.45
  -1  -2   3  612.99   14.74
  -1  -2   3  601.82   14.02
  -1  -2   4 1813.33   26.84
  -1  -2   5  355.21   12.65
  -1  -2   6   53.71    5.50
  -1  -2   7  367.70   14.02
  -1   2  -8  390.66    8.80
  -1  -2   8  529.64   17.65
   1   2   9  248.05    8.54
  -1  -2   9  269.94   13.13
  -1  -2  10  475.34   18.00
   1  -2 -10  476.32   22.58
  -1   2 -11  103.98   12.65
  -1  -2  11   95.66    8.41
   1  -2 -11  103.77   12.22
   1  -2 -12  140.50   14.04
  -1  -2  12  135.98   10.41
  -1   2 -12  130.07   14.11
  -1  -2  13  109.27    9.48
  -1   2 -13  101.55   12.91
   1  -2 -13  111.85   13.26
   1  -2 -14  169.08   16.80
  -1   2 -14  142.39   15.74
  -1   2 -15  581.74   32.00
   1  -2 -15  577.67   31.32
  -1   2 -16    4.67    5.56
   1  -2 -16    5.67    5.52
   1  -2 -17   94.83   14.11
  -1  -2  17   94.64    5.04
  -1   2 -17   90.90   14.39
  -1  -2  18   59.69    3.89
  -1  -2  18   65.64    4.52
  -1   2 -18   64.38   12.59
   1   2  18   64.88    4.22
   1  -2 -18   65.97   12.26
   1  -2 -18   63.49    4.39
   1   2  19  113.46    5.65
   1  -2 -19   94.99   14.37
  -1  -2  19  110.70    5.39
  -1   2 -19  114.68   16.61
  -1  -2  19  112.68    5.96
   1  -2 -19  110.70    5.80
  -1  -2  20   94.85    5.09
   1   2  20   96.62    5.30
  -1  -2  20   95.20    5.56
   1  -2 -20   92.05    5.41
  -1  -2  21   40.67    3.52
  -1  -2  21   43.32    3.98
   1  -2 -21   40.97    3.72
   1   2  21   44.21    3.72
  -1  -2  22   62.56    4.61
   1  -2 -22   67.49    4.54
   1   2  22   67.14    4.52
  -1  -2  22   67.40    4.41
   1   2  23    7.59    1.93
  -1  -2  23    8.87    2.02
  -1  -2  23    8.59    2.39
  -1  -2  24   13.11    2.17
  -1  -2  24   12.15    2.56
   1   2  24   11.00    2.09
  -1  -2  24   10.98    2.06
  -1  -2  25    1.11    1.28
   1   2  25    0.93    1.24
  -1  -2  25    1.15    1.65
   1   2  26   67.60    3.48
  -1  -2  26   68.66    3.91
  -1  -2  26   63.97    3.13
  -1  -2  27   22.06    1.52
   1   2  27   28.87    2.02
  -1  -2  27   30.67    2.46
  -1  -2  28    4.74    1.09
   1  -3  28    1.78    0.87
   1  -3  27   15.52    1.83
   1  -3  26   26.87    2.59
   1  -3  26   21.00    1.87
  -1   3  26   28.13    2.15
  -1   3  25   42.08    2.93
   1  -3  25   41.58    3.04
   1  -3  25   47.10    3.56
   1  -3  24   47.71    3.89
  -1  -3 -24   47.23    3.98
   1  -3  24   45.32    3.41
  -1   3  24   47.86    3.39
  -1   3  23   66.32    4.15
   1  -3  23   65.97    4.22
  -1  -3 -23   66.60    4.93
   1  -3  23   66.06    4.59
   1  -3  22   49.93    4.20
  -1   3  22   53.04    3.96
  -1  -3 -22   54.30    4.65
   1  -3  22   49.19    3.83
   1  -3  21  126.39    6.41
  -1  -3 -21  130.63    7.04
   1  -3  21  115.96    5.59
  -1   3  21  124.11    5.89
  -1   3  20  106.14    5.46
   1  -3  20  105.55    5.30
   1  -3  20  108.33    5.85
  -1  -3 -20  110.48    6.52
  -1   3  19  127.81    5.87
   1   3 -19  143.11   17.82
  -1  -3 -19  136.31    7.13
   1  -3  19  139.54    5.96
   1  -3  19  137.26    6.46
  -1  -3 -19  132.07   17.45
   1  -3  18  132.26    5.69
  -1  -3 -18  147.93    7.28
  -1  -3 -18  151.06   18.34
   1  -3  18  140.80    6.39
   1   3 -18  140.26   17.98
  -1   3  18  140.65    5.93
  -1  -3 -17   43.69    4.00
   1   3 -17   43.75   11.30
   1  -3  17   39.97    3.11
  -1   3  17   43.25    3.33
  -1  -3 -17   49.49   11.02
  -1  -3 -16    4.39    4.24
  -1  -3 -15  303.11   24.08
  -1  -3 -14  129.85   15.37
  -1  -3 -13   21.47    7.24
  -1   3  12  149.80   10.69
  -1  -3 -12  141.65   14.89
  -1   3  11  167.13   11.19
   1  -3  11  156.52    9.00
  -1  -3 -11  161.39   14.80
  -1  -3 -10  163.78   14.35
   1  -3  10  151.76    8.72
   1  -3   9  348.73   13.28
  -1  -3  -9  325.91   18.30
  -1  -3  -8  157.00   12.13
   1  -3   8  202.99   10.22
  -1  -3  -7  666.81   22.58
   1  -3   7 1057.49   20.93
   1  -3   6  684.79   16.95
  -1  -3  -6  499.18   17.98
   1  -3   5   76.21    6.13
  -1  -3  -5   84.81    7.22
  -1  -3  -4 1759.71   27.97
   1  -3   4 1722.19   25.04
   1  -3   3 2838.67   23.89
   1  -3   3 2692.50   30.95
   1  -3   2 1504.90   18.39
   1  -3   2 1604.27   24.80
   1  -3   1  246.05    9.59
  -1  -3  -1  269.24    9.72
  -1  -3   0    1.63    2.30
   1  -3   0    1.48    1.78
  -1  -3   1  246.70   10.00
  -1  -3   1  236.72    9.46
  -1  -3   2 1546.78   23.63
  -1  -3   2 1493.99   24.80
  -1  -3   2 1574.08   25.84
   1  -3  -2 1540.41   15.04
  -1  -3   3 2876.51   32.71
  -1  -3   3 2941.24   36.89
   1  -3  -3 2961.52   26.21
  -1  -3   3 2887.88   35.54
   1  -3  -4 1796.29   24.54
  -1  -3   4 1845.13   30.13
  -1  -3   4 1810.98   29.82
  -1  -3   4 1852.89   26.93
  -1  -3   5   81.55    6.89
   1  -3  -5   73.92    6.06
  -1  -3   6  490.42   16.85
   1  -3  -6  452.26   15.80
   1  -3  -7  627.95   20.37
  -1  -3   7  682.00   20.52
   1  -3  -8  139.11   11.00
  -1  -3   8  145.33   10.06
  -1  -3   9  335.93   15.61
   1  -3  -9  290.61   16.41
   1  -3 -10  136.39   12.43
  -1  -3  10  134.76   10.26
   1  -3 -11  176.47   14.54
  -1  -3  11  179.12   12.13
   1  -3 -12  157.65   14.45
  -1   3 -12  174.69   16.13
  -1  -3  12  180.93   12.63
  -1  -3  13   11.22    3.78
   1  -3 -13   16.39    6.06
  -1   3 -13   20.43    7.06
  -1   3 -14  113.33   14.15
   1  -3 -14  107.18   13.15
  -1   3 -15  285.65   22.52
   1  -3 -15  315.06   23.13
  -1   3 -16   -1.11    4.69
   1  -3 -16    9.54    6.13
   1  -3 -17   33.54    8.85
  -1   3 -17   47.21   10.41
  -1  -3  17   43.08    3.24
  -1  -3  17   44.82    3.63
   1  -3 -17   41.06    3.63
  -1  -3  18  133.94    5.76
  -1  -3  18  142.02    6.50
  -1   3 -18  143.17   17.91
   1  -3 -18  131.98    6.41
   1  -3 -18  153.50   17.95
   1   3  18  135.17    5.76
  -1   3 -19  126.59   16.69
   1  -3 -19  132.24   17.21
   1  -3 -19  111.59    6.06
  -1  -3  19  116.46    6.04
  -1  -3  19  116.22    5.56
   1   3  19  108.40    5.39
   1  -3 -20  116.24    6.22
   1   3  20  109.42    5.46
  -1  -3  20  122.07    5.69
  -1  -3  20  119.35    6.22
  -1  -3  21  121.72    5.80
   1   3  21  129.05    5.89
   1  -3 -21  122.46    6.41
  -1  -3  21  132.68    6.61
   1  -3 -22   46.99    4.11
  -1  -3  22   43.71    3.67
   1   3  22   41.88    3.50
  -1  -3  22   44.08    3.93
   1   3  23   69.32    4.20
  -1  -3  23   69.88    4.33
  -1  -3  23   66.38    4.67
   1   3  24   50.88    3.43
  -1  -3  24   49.10    3.96
  -1  -3  24   47.23    3.50
  -1  -3  25   45.97    3.26
   1   3  25   46.78    3.02
  -1  -3  25   48.56    3.59
  -1  -3  26   22.45    2.11
  -1  -3  26   24.02    2.50
   1   3  26   23.93    1.93
  -1  -3  27   10.65    1.28
  -1  -3  27   15.56    1.85
  -1  -3  28    2.26    0.87
   1  -4  28    5.15    0.89
   1  -4  27   35.04    2.30
   1  -4  27   24.74    1.54
   1  -4  26   35.30    2.35
   1  -4  26   38.82    2.85
   1  -4  26   37.17    2.52
   1  -4  25    9.13    1.96
   1  -4  25    9.43    1.80
   1  -4  24    8.06    2.15
  -1   4  24    8.37    1.63
   1  -4  24    5.52    1.87
  -1  -4 -24    4.76    2.00
  -1   4  23   23.11    2.48
   1  -4  23   23.43    2.98
  -1  -4 -23   22.39    3.26
   1  -4  23   23.50    2.74
  -1   4  22    5.83    1.70
   1  -4  22    6.54    2.13
  -1  -4 -22    5.89    2.37
   1  -4  22    5.63    1.91
   1  -4  21   27.82    3.06
   1  -4  21   24.78    3.24
  -1   4  21   27.45    2.80
  -1  -4 -21   24.30    3.63
  -1   4  20   18.63    2.46
   1  -4  20   14.78    2.43
  -1  -4 -20   21.28    3.41
   1  -4  20   20.06    2.83
  -1   4  19  109.14    5.19
  -1  -4 -19  114.96    6.74
   1  -4  19  113.68    5.50
   1  -4  19  112.55    5.87
   1   4 -18    5.74    6.09
   1  -4  18    4.83    1.74
  -1  -4 -18    5.72    4.98
  -1  -4 -18    8.15    2.72
   1  -4  18    9.78    2.20
   1   4 -17   76.73   13.28
   1  -4  17   76.10    4.28
   1  -4  17   71.73    4.50
  -1  -4 -17   80.38    5.46
  -1  -4 -17   80.97   13.37
  -1  -4 -16   19.65    6.96
  -1  -4 -15   51.12   10.48
  -1  -4 -14  137.63   15.61
  -1  -4 -13  235.01   19.56
  -1  -4 -12  109.72   12.89
  -1   4  12  109.27    9.63
   1  -4  11  227.57   12.24
  -1  -4 -11  204.56   16.48
  -1  -4 -10  222.75   16.43
   1  -4  10  246.51   12.87
   1  -4   9  221.90   12.59
  -1  -4  -9  196.51   14.32
  -1  -4  -8  276.89   15.91
   1  -4   8  295.89   15.35
   1  -4   7  859.58   21.78
  -1  -4  -7  951.98   26.87
   1  -4   6  438.78   15.32
  -1  -4  -6  478.21   17.71
   1  -4   5  653.53   18.37
  -1  -4  -5  689.72   19.76
   1  -4   4   71.71    6.46
   1  -4   4   77.81    4.91
   1  -4   3 1327.97   27.04
   1  -4   3 1286.45   19.95
   1  -4   2  622.88   14.54
   1  -4   2  649.29   18.19
  -1  -4  -1  165.19    9.15
   1  -4   1  154.28    7.85
   1  -4   1  156.50    9.02
  -1  -4   0 2097.78   32.10
  -1  -4   0 2080.96   31.65
  -1  -4   1  151.98    8.89
  -1  -4   1  154.48    9.13
  -1  -4   2  627.27   18.21
  -1  -4   2  617.80   18.43
  -1  -4   2  624.62   17.26
  -1  -4   3 1348.23   27.56
  -1  -4   3 1337.10   25.06
   1  -4  -3 1323.53   17.87
  -1  -4   3 1303.76   27.52
   1  -4  -4   78.18    5.30
  -1  -4   4   77.53    7.35
  -1  -4   4   80.84    7.24
  -1  -4   4   83.12    6.54
  -1  -4   5  686.29   18.67
   1  -4  -5  657.27   17.08
  -1  -4   5  663.61   21.08
  -1  -4   5  674.42   21.00
  -1  -4   6  479.62   19.11
   1  -4  -6  492.03   16.56
  -1  -4   6  500.92   18.76
   1  -4  -7  937.01   24.54
  -1  -4   7  991.46   28.28
  -1  -4   7  985.98   27.06
   1  -4  -8  249.74   14.04
  -1  -4   8  259.29   14.45
  -1  -4   9  175.15   12.24
   1  -4  -9  161.04   12.06
  -1  -4  10  197.73   13.30
   1  -4 -10  197.30   14.45
  -1  -4  11  181.08   12.87
   1  -4 -11  216.18   15.80
   1  -4 -12  115.46   12.59
  -1  -4  12  104.88   10.09
   1  -4 -13  243.03   18.61
  -1   4 -13  221.03   18.41
  -1  -4  13  216.60   14.61
  -1   4 -14  130.63   15.61
   1  -4 -14  126.92   14.45
  -1   4 -15   33.76    8.91
   1  -4 -15   44.34    9.69
   1  -4 -16   28.93    8.06
  -1   4 -16   28.19    9.04
  -1  -4  17   96.31   12.87
   1  -4 -17   96.99    5.56
  -1   4 -17   85.03   13.32
  -1  -4  17   96.79    5.28
  -1  -4  17   89.25    4.69
   1  -4 -17  102.68   14.61
  -1  -4  18    4.96    1.89
   1  -4 -18    3.41    3.80
  -1   4 -18   -0.33    5.76
  -1  -4  18    9.06    2.35
  -1  -4  18   -2.80    3.50
   1  -4 -18    5.63    2.15
  -1  -4  19  119.87    6.09
   1  -4 -19  112.09    6.30
  -1  -4  19  115.55    5.59
  -1  -4  20   19.32    2.96
   1  -4 -20   21.11    3.15
  -1  -4  20   18.89    2.65
  -1  -4  21   29.76    3.46
   1   4  21   25.19    2.63
  -1  -4  21   31.28    3.28
   1  -4 -21   25.52    3.33
  -1  -4  22   11.82    2.37
   1   4  22    8.15    1.67
  -1  -4  22    7.96    2.20
  -1  -4  23   18.82    2.67
  -1  -4  23   21.02    2.80
  -1  -4  24    5.80    1.96
  -1  -4  24    6.19    1.93
  -1  -4  25   12.89    2.11
  -1  -4  25   13.76    2.09
  -1  -4  26   35.26    2.46
  -1  -4  26   37.15    2.74
  -1  -4  27   37.67    2.37
  -1  -4  27   30.10    1.85
  -1  -4  28    4.30    0.80
   1  -5  27   67.73    2.72
   1  -5  27   49.49    2.02
   1  -5  26   60.30    2.91
   1  -5  26   58.30    3.09
   1  -5  26   61.36    3.00
   1  -5  25    2.85    1.43
   1  -5  25    1.54    1.37
   1  -5  24   12.30    2.09
   1  -5  24   12.06    2.15
   1  -5  23   48.99    3.67
   1  -5  23   51.51    3.87
  -1  -5 -23   48.38    4.35
   1  -5  22   14.13    2.52
   1  -5  22   14.41    2.48
  -1  -5 -22   15.43    3.11
   1  -5  21   30.04    3.24
  -1  -5 -21   31.78    3.91
   1  -5  21   32.60    3.26
   1  -5  20   49.95    4.13
  -1  -5 -20   48.51    4.69
   1  -5  20   48.32    3.80
   1  -5  19   70.40    4.41
   1  -5  19   69.49    4.69
  -1  -5 -19   70.49    5.41
   1  -5  18   26.08    7.69
   1   5 -18   27.19    8.11
  -1  -5 -18   36.12    8.91
  -1  -5 -18   29.52    3.78
   1  -5  18   31.21    3.02
   1  -5  18   28.17    3.13
   1  -5  17    0.61    1.35
  -1  -5 -17    3.02    2.11
   1  -5  17    0.39    1.43
   1   5 -17   -3.91    5.83
  -1  -5 -17   -3.48    3.50
  -1  -5 -16  361.12   26.69
   1  -5  16  360.03    8.87
  -1  -5 -16  392.37   11.37
   1  -5  16  300.50    8.56
  -1  -5 -16  286.06   21.89
  -1  -5 -15   87.38   12.15
  -1  -5 -15   75.40   12.52
  -1  -5 -14  256.03   21.11
  -1  -5 -13   24.93    6.72
  -1  -5 -12   31.58    7.61
  -1  -5 -11   21.08    6.09
   1  -5  11   15.45    4.22
   1  -5  10  162.89   12.65
  -1  -5 -10  161.21   13.91
  -1  -5  -9  288.98   17.26
   1  -5   9  252.03   13.98
   1  -5   8  218.79   12.69
  -1  -5  -8  238.09   14.93
   1  -5   7  245.11   13.17
   1  -5   6  161.21   12.67
   1  -5   6  168.82   10.98
   1  -5   5  416.52   12.67
   1  -5   5  400.00   18.28
   1  -5   4  464.71   18.63
   1  -5   4  492.86   14.11
  -1  -5  -4  452.63   19.78
  -1  -5  -3  295.11   15.28
   1  -5   3  302.54   14.58
   1  -5   3  304.11   11.48
   1  -5   2  442.15   14.26
  -1  -5  -2  457.71   17.98
   1  -5   2  467.32   17.43
  -1  -5  -1 1201.31   28.32
   1  -5   1 1237.68   27.30
  -1  -5   0  441.06   16.78
  -1  -5   0  439.06   16.61
  -1  -5   1 1158.78   27.26
  -1  -5   1 1187.21   26.74
  -1  -5   2  428.78   15.85
  -1  -5   2  430.15   16.80
  -1  -5   3  254.72   12.37
  -1  -5   3  249.01   13.24
  -1  -5   3  264.24   13.89
  -1  -5   4  484.38   18.74
  -1  -5   4  501.75   17.28
  -1  -5   4  490.79   19.54
   1  -5  -5  431.65   13.67
  -1  -5   5  420.91   18.76
  -1  -5   5  449.69   16.45
  -1  -5   5  415.44   17.93
  -1  -5   6  128.87   10.41
   1  -5  -6  140.13    8.85
  -1  -5   6  134.91    9.56
  -1  -5   6  142.52   11.69
  -1  -5   7  245.33   14.65
   1  -5  -7  250.33   12.78
  -1  -5   7  249.70   15.74
   1  -5  -8  184.99   12.09
  -1  -5   8  188.93   14.35
  -1  -5   8  173.41   12.80
  -1  -5   9  284.06   18.30
  -1  -5   9  263.26   15.67
   1  -5  -9  279.02   16.04
  -1  -5  10  113.83   10.52
  -1  -5  10  124.59   12.69
   1  -5 -10  116.03   11.13
   1  -5 -11   15.98    5.37
  -1  -5  11    3.48    4.11
  -1  -5  11    9.78    4.02
  -1  -5  12   19.71    6.26
  -1  -5  12   21.08    5.22
   1  -5 -12   31.71    6.96
  -1   5 -13   29.76    7.69
  -1  -5  13   20.13    4.98
   1  -5 -13   37.28    7.67
  -1  -5  13   25.45    7.09
   1  -5 -14  242.31   19.63
  -1  -5  14  249.98   20.00
  -1   5 -14  225.68   18.93
  -1  -5  15   86.92   12.28
   1  -5 -15  105.29   13.69
  -1   5 -15   77.03   12.35
  -1  -5  16  387.18    9.30
   1  -5 -16  397.16   26.41
   1  -5 -16  405.00   11.13
  -1  -5  16  406.61   26.60
  -1   5 -16  387.85   26.39
  -1  -5  17   -0.48    1.61
   1  -5 -17    0.30    1.39
  -1  -5  17   -1.61    3.59
  -1  -5  17    2.17    1.50
   1  -5 -17    0.80    1.89
  -1   5 -17    5.54    5.48
   1  -5 -17    1.72    4.20
  -1  -5  18   24.97    3.04
  -1  -5  18   39.93    8.74
   1  -5 -18   26.13    3.37
  -1   5 -18   27.84    8.37
   1  -5 -18   27.08    2.78
  -1  -5  18   29.93    3.02
   1  -5 -18   14.87    4.37
   1  -5 -19   77.18    5.41
  -1  -5  19   78.27    4.65
   1  -5 -19   74.25    4.30
  -1  -5  19   81.62    5.11
   1  -5 -20   51.75    4.63
  -1  -5  20   57.40    4.30
  -1  -5  20   50.84    3.93
  -1  -5  21   33.56    3.48
  -1  -5  21   31.73    3.28
  -1  -5  22   16.02    2.63
  -1  -5  22   15.17    2.54
  -1  -5  23   47.84    3.59
  -1  -5  23   47.82    3.74
  -1  -5  24   10.45    2.04
  -1  -5  24   10.69    2.04
  -1  -5  25    4.02    1.48
  -1  -5  25    5.09    1.61
  -1  -5  26   64.03    3.11
  -1  -5  26   61.38    3.13
  -1  -5  27   42.08    2.02
  -1  -5  27   61.58    2.61
   1  -6  27    2.24    0.65
   1  -6  26   -0.48    0.98
   1  -6  26   -0.26    0.87
   1  -6  26   -0.85    1.02
   1  -6  25   61.34    3.24
   1  -6  25   54.47    3.04
   1  -6  24    3.52    1.52
   1  -6  24    5.19    1.67
   1  -6  23   13.35    2.28
   1  -6  23   12.19    2.13
   1  -6  22    3.43    1.87
  -1  -6 -22    0.76    2.35
   1  -6  22    2.11    1.72
  -1  -6 -21   40.93    4.50
   1  -6  21   41.84    3.56
   1  -6  21   35.84    3.41
  -1  -6 -20  239.12    9.72
   1  -6  20  230.44    7.80
   1  -6  20  250.55    8.32
  -1  -6 -19    0.33    2.22
   1  -6  19    0.61    1.70
   1  -6  19    0.59    1.63
  -1  -6 -18   55.90    4.91
   1  -6  18   53.19    4.00
   1  -6  18   49.84    3.83
   1  -6  17  103.31    5.24
   1   6 -17   84.60   13.30
  -1  -6 -17  103.35    6.43
  -1  -6 -17  106.20    5.17
   1  -6  17  104.64   14.50
   1  -6  17   90.46    4.83
  -1  -6 -16  137.85    5.83
  -1  -6 -16  143.11    7.19
   1  -6  16  136.52    5.63
   1  -6  16  144.76    6.04
   1  -6  16  161.02   19.28
   1  -6  15  109.11   14.76
  -1  -6 -15   96.57    5.72
   1  -6  15   89.59    4.41
  -1  -6 -14   45.78   11.13
   1  -6  14   58.51   11.13
   1  -6  13    6.24    4.20
  -1  -6 -13   -0.63    4.85
   1  -6  12  152.30   15.98
   1  -6  11  155.22   15.80
   1  -6  10   94.22   12.06
   1  -6   9  183.88   15.67
   1  -6   8   18.69    5.87
   1  -6   7 1024.58   33.86
  -1  -6  -7  959.33   34.34
   1  -6   6   82.47    6.39
  -1  -6  -6   81.12   10.50
   1  -6   6   88.14   10.17
   1  -6   5  218.97   14.85
  -1  -6  -5  227.66   16.00
   1  -6   5  229.83   10.63
  -1  -6  -4  289.67   16.89
   1  -6   4  292.56   12.37
   1  -6   4  294.78   16.32
   1  -6   3  313.15   13.13
   1  -6   3  319.93   16.50
  -1  -6  -3  316.71   17.39
   1  -6   2  484.25   19.71
  -1  -6  -2  477.77   20.54
   1  -6   2  478.12   16.89
   1  -6   1  300.82   13.85
  -1  -6  -1  290.37   15.67
   1  -6   0   33.13    5.48
  -1  -6   0   33.49    5.83
  -1  -6   1  292.24   15.65
   1  -6  -1  276.76   14.80
  -1  -6   1  288.22   14.74
  -1  -6   2  546.39   19.69
  -1  -6   2  517.42   21.11
  -1  -6   3  297.45   16.00
  -1  -6   3  282.00   14.26
  -1  -6   4  259.61   13.76
  -1  -6   4  249.20   15.45
  -1  -6   4  248.79   14.93
  -1  -6   5  218.53   15.19
  -1  -6   5  221.25   12.65
  -1  -6   5  210.95   14.02
  -1  -6   6   95.49    8.89
  -1  -6   6   95.40   10.54
  -1  -6   6   91.51    9.52
  -1  -6   7  998.87   30.97
  -1  -6   7 1089.46   34.76
   1  -6  -8   24.69    4.61
  -1  -6   8   22.45    5.67
  -1  -6   8   27.15    6.69
   1  -6  -9  172.95   12.30
  -1  -6   9  157.65   12.98
  -1  -6   9  161.34   14.76
  -1  -6  10   79.18    9.39
  -1  -6  10   86.53   11.32
   1  -6 -10   99.46   10.09
  -1  -6  11  141.17   14.72
  -1  -6  11  142.24   12.67
   1  -6 -11  157.63   13.30
  -1  -6  12  134.31   14.63
  -1  -6  12  138.91   12.67
   1  -6 -12  142.11   13.28
  -1   6 -12  145.41   14.13
  -1  -6  13    8.13    5.76
  -1   6 -13    5.72    4.63
  -1  -6  13    2.39    2.93
   1  -6 -13    4.87    4.39
  -1  -6  14   57.01   10.54
  -1   6 -14   61.60   10.04
   1  -6 -14   69.25   10.43
  -1   6 -15   89.05   12.43
   1  -6 -15   99.66    5.17
  -1  -6  15   98.53    4.72
  -1  -6  15  107.51   13.95
   1  -6 -15  102.57   12.67
   1  -6 -15   99.53    5.67
   1  -6 -16  146.22    7.13
  -1   6 -16  146.41   16.15
  -1  -6  16  150.15    5.98
   1  -6 -16  153.98    6.52
  -1  -6  16  162.28   17.45
  -1  -6  17   96.70    5.00
   1  -6 -17  104.83    5.41
  -1  -6  17   87.51   12.65
   1  -6 -17   96.90    6.04
  -1  -6  17  104.18    5.35
  -1  -6  18   54.25    4.04
   1  -6 -18   48.12    4.00
   1  -6 -18   53.54    4.67
  -1  -6  18   55.17    3.98
   1  -6 -19    0.46    1.48
  -1  -6  19    0.65    1.56
   1  -6 -19    0.57    2.09
  -1  -6  19    2.67    1.80
   1  -6 -20  224.03    7.39
  -1  -6  20  234.90    8.11
  -1  -6  20  219.36    7.61
  -1  -6  21   41.04    3.54
  -1  -6  21   38.28    3.46
  -1  -6  22    0.78    1.54
  -1  -6  22    3.63    2.02
  -1  -6  23   16.00    2.39
  -1  -6  23   13.30    2.17
  -1  -6  24    3.37    1.70
  -1  -6  24    2.09    1.37
  -1  -6  25   53.54    3.00
  -1  -6  25   57.84    3.30
  -1  -6  26    0.63    0.89
  -1  -6  26    0.85    0.96
  -1  -6  27    3.00    0.70
  -1  -6  27    1.46    0.70
   1  -7  26    1.70    0.76
   1  -7  26    1.15    0.78
   1  -7  25    5.74    1.33
   1  -7  25    5.35    1.13
   1  -7  24   18.78    1.89
   1  -7  24   18.74    2.20
   1  -7  23   21.17    2.50
   1  -7  23   19.11    2.15
   1  -7  22    6.52    1.91
   1  -7  22    6.80    1.74
   1  -7  21   12.95    2.15
   1  -7  21   11.17    2.33
  -1  -7 -21   14.39    3.17
   1  -7  20   12.24    2.20
   1  -7  20   11.45    2.41
  -1  -7 -20   12.24    2.96
  -1  -7 -19   28.04    3.85
  -1  -7 -19   28.54    3.02
   1  -7  19   26.04    2.85
   1  -7  19   28.65    3.11
  -1  -7 -18  163.11    6.59
   1  -7  18  172.76    6.74
  -1  -7 -18  174.06    8.37
   1  -7  18  152.87    6.39
   1  -7  17   42.28    3.48
  -1  -7 -17   42.38    3.70
  -1  -7 -17   44.15    4.48
   1  -7  17   39.91    3.46
  -1  -7 -16   39.75    3.56
  -1  -7 -16   40.65    4.22
   1  -7  16   39.52    9.46
   1  -7  16   37.69    3.17
   1   7 -16   51.80    9.98
   1  -7  16   41.02    3.33
   1  -7  15  190.86   19.65
   1  -7  15  188.01    6.59
   1  -7  15  184.95    6.50
  -1  -7 -15  194.67    8.28
  -1  -7 -14  131.98    6.00
   1  -7  14  123.50    5.13
  -1  -7 -14  123.92   15.82
   1  -7  14  129.52   16.06
   1  -7  14  131.68    6.78
  -1  -7 -14  136.15    6.72
  -1  -7 -13  179.17   18.82
   1  -7  13  202.06   19.43
   1  -7  12   17.21    6.06
  -1  -7 -12   23.74    8.50
   1  -7  11    4.65    5.11
  -1  -7 -11    3.46    4.11
   1  -7  10  103.51   13.13
  -1  -7 -10   81.66   12.24
  -1  -7  -9   47.01    9.32
   1  -7   9   57.12    9.59
  -1  -7  -8  218.31   18.69
   1  -7   8  232.62   18.15
   1  -7   7    8.50    4.41
  -1  -7  -7   18.08    6.46
   1  -7   6  312.97   19.45
  -1  -7  -6  325.58   21.15
   1  -7   5   52.51    5.69
  -1  -7  -5   46.01    8.89
   1  -7   5   49.75    8.13
  -1  -7  -4  331.36   19.69
   1  -7   4  304.39   18.04
   1  -7   4  325.65   14.35
   1  -7   3   14.98    3.98
  -1  -7  -3   15.43    5.26
  -1  -7  -2  392.07   20.34
   1  -7   2  412.85   17.15
   1  -7   1  369.23   17.00
  -1  -7  -1  374.62   19.26
   1  -7   0  191.12   12.87
  -1  -7   0  201.10   13.87
  -1  -7   1  415.11   19.11
   1  -7  -1  408.52   19.00
  -1  -7   2  375.16   17.85
   1  -7  -2  372.42   19.19
  -1  -7   3   24.26    5.02
  -1  -7   3   25.28    6.52
  -1  -7   4  316.02   18.71
  -1  -7   4  330.14   16.45
  -1  -7   5   56.93    6.87
  -1  -7   5   60.10    8.54
  -1  -7   6  361.25   17.35
  -1  -7   6  331.12   19.39
  -1  -7   6  371.86   21.45
  -1  -7   7   19.91    6.19
  -1  -7   7   16.19    5.48
  -1  -7   8  226.75   16.43
  -1  -7   8  267.63   19.32
  -1  -7   9   50.80    8.28
  -1  -7   9   56.23    9.56
  -1  -7  10   95.75   12.52
  -1  -7  10  108.33   11.78
  -1  -7  11    2.98    3.22
  -1  -7  11    0.93    4.22
  -1  -7  12   19.08    5.85
  -1  -7  12   29.32    8.04
  -1  -7  13  188.67   16.02
  -1  -7  13  172.73   17.78
   1  -7 -14  116.24    5.85
  -1  -7  14  104.35    4.78
   1  -7 -14  133.13    6.56
  -1  -7  14  126.20   15.67
  -1  -7  15  177.62    6.39
   1  -7 -15  176.86    7.74
   1  -7 -15  191.34    7.37
  -1  -7  15  186.15    6.63
  -1  -7  15  177.41   18.67
  -1  -7  16   45.88    9.22
  -1  -7  16   45.38    3.52
  -1  -7  16   46.69    3.59
   1  -7 -16   47.17    4.28
   1  -7 -16   51.06    4.09
   1  -7 -17   37.69    4.09
  -1  -7  17   38.56    3.35
   1  -7 -17   37.91    3.65
  -1  -7  17   40.84    3.41
   1  -7 -18  172.63    7.02
  -1  -7  18  148.96    6.30
  -1  -7  18  178.34    6.87
   1  -7 -19   23.65    2.93
  -1  -7  19   23.06    2.83
  -1  -7  19   22.00    2.80
   1  -7 -20   11.02    2.20
  -1  -7  20   14.39    2.39
  -1  -7  20    9.02    2.17
   1  -7 -21   18.04    2.28
  -1  -7  21   15.63    2.33
  -1  -7  21   13.89    2.33
  -1  -7  22    5.96    1.61
  -1  -7  22    5.69    1.87
  -1  -7  23   21.37    2.28
  -1  -7  23   18.32    2.26
  -1  -7  24   19.04    1.93
  -1  -7  24   18.52    2.17
  -1  -7  25    5.50    1.09
  -1  -7  25    5.22    1.20
  -1  -7  25    4.78    1.30
  -1  -7  26    1.09    0.70
  -1  -7  26    1.02    0.83
   1  -8  25   10.59    1.37
   1  -8  25    7.17    0.98
   1  -8  24   -0.24    0.37
   1  -8  24    5.74    1.39
   1  -8  23   10.59    1.50
   1  -8  23    9.89    1.80
   1  -8  22   37.26    2.67
   1  -8  22   41.52    3.09
   1  -8  21   20.74    2.59
   1  -8  21   17.00    2.15
   1  -8  20   68.66    3.96
  -1  -8 -20   72.05    4.09
   1  -8  20   75.25    4.46
   1  -8  19   11.89    2.39
  -1  -8 -19   13.43    3.17
  -1  -8 -19   11.78    2.26
   1  -8  19   14.26    2.24
   1  -8  18   42.91    3.65
   1  -8  18   37.49    3.17
  -1  -8 -18   33.97    4.13
  -1  -8 -18   46.95    3.87
  -1  -8 -17    1.85    1.83
   1  -8  17    8.17    1.80
  -1  -8 -17    6.65    2.63
   1  -8  17    5.48    2.02
  -1  -8 -16   50.45    4.83
   1  -8  16   48.06    3.63
  -1  -8 -16   51.97    4.17
   1  -8  15  211.25    6.98
  -1  -8 -15  230.73    8.35
  -1  -8 -15  255.31    9.61
   1  -8  15  247.72   22.45
   1  -8  14   24.74    2.59
  -1  -8 -14   26.89    3.22
  -1  -8 -14   30.00    8.59
  -1  -8 -14   24.17    3.41
   1  -8  14   23.50    3.26
   1  -8  14   21.47    6.91
  -1  -8 -13  218.21    8.28
  -1  -8 -13  206.97   21.32
   1  -8  13  186.73    6.26
   1  -8  13  209.75    7.91
   1  -8  13  229.14   21.17
  -1  -8 -13  222.29    7.91
  -1  -8 -12   37.43    9.04
   1  -8  12   47.32    9.98
  -1  -8 -11   23.67    7.87
   1  -8  11   25.17    7.91
  -1  -8 -10   17.74    6.69
   1  -8  10   22.50    6.69
  -1  -8  -9  160.15   17.48
   1  -8   9  184.06   17.48
  -1  -8  -8  408.07   26.97
   1  -8   8  412.85   25.13
  -1  -8  -7   75.38   11.43
   1  -8   7   79.60   10.98
   1  -8   6  185.25   16.19
  -1  -8  -6  176.93   16.91
  -1  -8  -5    9.19    5.11
  -1  -8  -4   83.92   11.24
   1  -8   4   79.18    7.87
  -1  -8  -3  535.81   26.28
   1  -8   3  563.87   21.21
  -1  -8  -2   74.34    9.87
   1  -8   2   76.64    8.30
  -1  -8  -1   52.32    8.37
   1  -8   1   62.16    8.02
  -1  -8   0  148.39   12.76
   1  -8   0  149.69   12.15
  -1  -8   1   52.38    7.80
   1  -8  -1   56.19    8.13
   1  -8  -2   68.51    9.02
  -1  -8   2   67.55    8.52
  -1  -8   3  542.29   22.87
   1  -8  -3  527.98   25.28
   1  -8  -4   87.42   11.11
  -1  -8   4   85.96    9.24
   1  -8  -5    5.78    4.85
  -1  -8   5    1.67    2.39
  -1  -8   6  198.32   16.17
  -1  -8   6  187.19   13.58
  -1  -8   7   73.03   10.69
  -1  -8   8  407.59   23.50
  -1  -8   9  170.84   15.69
  -1  -8   9  208.62   18.58
  -1  -8  10   16.28    5.26
  -1  -8  10   24.58    7.65
  -1  -8  11   19.26    6.85
  -1  -8  11   25.00    6.63
  -1  -8  12   31.63    8.09
   1  -8 -13  220.66    8.43
  -1  -8  13  216.03    8.02
  -1  -8  13  235.42   21.28
  -1  -8  13  221.75    6.72
   1  -8 -13  232.33    8.37
   1  -8 -14   25.80    3.26
  -1  -8  14   27.32    7.65
  -1  -8  14   26.04    2.65
  -1  -8  14   27.19    3.41
  -1  -8  15  190.43    6.65
   1  -8 -15  211.51    8.13
  -1  -8  16   40.36    3.41
   1  -8 -16   38.36    3.80
  -1  -8  17    2.48    1.59
   1  -8 -17    1.61    1.78
  -1  -8  18   38.32    3.28
   1  -8 -18   40.21    3.87
  -1  -8  18   44.17    3.52
   1  -8 -19   18.69    2.78
  -1  -8  19   17.74    2.48
  -1  -8  19   19.67    2.39
  -1  -8  20   54.60    3.54
  -1  -8  20   50.80    3.76
   1  -8 -20   56.08    3.93
  -1  -8  21   23.45    2.65
  -1  -8  21   18.24    2.11
   1  -8 -21   20.32    2.41
   1  -8 -22   51.32    3.11
  -1  -8  22   49.23    3.33
  -1  -8  22   48.14    2.96
  -1  -8  23    7.61    1.28
  -1  -8  23    9.56    1.70
  -1  -8  24   -0.63    0.41
  -1  -8  24    2.46    1.07
  -1  -8  25   10.63    1.24
  -1  -8  25   10.76    1.39
   1  -9  25    1.07    0.72
  -1   9  25    1.78    0.65
   1  -9  24    0.26    0.85
   1  -9  24    0.07    0.30
   1  -9  23   47.86    2.78
   1  -9  23   36.78    2.15
   1  -9  22   22.95    2.30
  -1  -9 -21    8.32    1.48
   1  -9  21    9.87    1.91
   1  -9  20    2.80    1.65
  -1  -9 -20    2.56    1.48
  -1  -9 -19  178.28    6.65
   1  -9  19  172.63    6.35
  -1  -9 -18   58.10    4.26
   1  -9  18   60.82    3.96
   1  -9  17   82.18    4.59
  -1  -9 -17   79.01    4.98
  -1  -9 -16   23.00    3.52
  -1  -9 -16   29.82    3.50
   1  -9  16   27.87    2.96
  -1  -9 -15   41.06    4.30
   1  -9  15   41.10    3.26
  -1  -9 -15   37.58    3.78
   1  -9  14   31.15    2.89
   1  -9  14   35.23    3.93
  -1  -9 -14   40.30    4.11
  -1  -9 -14   38.21    3.87
  -1  -9 -13  101.92    5.83
  -1  -9 -13   78.66   14.11
  -1  -9 -13   93.42    5.69
   1  -9  13   87.88    5.50
   1  -9  13   87.73    4.39
   1  -9  13   98.94   14.50
   1  -9  12   36.04    2.91
  -1  -9 -12   39.78   10.30
   1  -9  12   45.21   10.28
  -1  -9 -12   41.17    3.91
   1  -9  12   39.45    3.65
  -1  -9 -12   45.86    4.06
  -1  -9 -11  173.93    7.26
  -1  -9 -11  168.13   19.43
   1  -9  11  179.23   18.89
  -1  -9 -11  207.97    7.80
   1  -9  11  194.54    7.46
  -1  -9 -10  121.13   16.43
   1  -9  10  115.31   14.85
   1  -9   9  105.24   13.87
  -1  -9  -9  113.00   15.58
  -1  -9  -8    5.61    5.22
   1  -9   8    1.98    4.02
  -1  -9  -7   17.82    6.54
  -1  -9  -6   94.62   13.13
  -1  -9  -5   39.45    8.78
  -1  -9  -4  333.64   23.00
  -1  -9  -3   74.29   10.80
   1  -9   3   72.86    8.37
   1  -9   2   16.04    4.48
  -1  -9  -2   17.93    6.28
  -1  -9  -1  256.18   18.45
   1  -9   1  257.22   16.67
  -1  -9   0    5.46    4.02
   1  -9   0    1.15    2.93
  -1  -9   1  267.37   17.82
   1  -9  -1  263.02   18.04
   1  -9  -2   18.80    5.39
  -1  -9   2   10.98    4.17
  -1  -9   3   76.92    9.35
   1  -9  -3   70.90   10.17
  -1  -9   4  362.88   19.82
   1  -9  -4  371.99   23.37
  -1  -9   5   30.39    5.85
   1  -9  -5   37.67    8.35
   1  -9  -6   93.96   12.82
   1  -9  -7   19.52    6.39
   1  -9  -8    0.65    4.41
   1  -9  -9  100.70   14.93
   1  -9 -10  120.35   16.19
   1  -9 -11  169.60    7.06
  -1  -9  11  181.88    7.17
  -1  -9  12   53.23    4.22
   1  -9 -12   52.30    4.22
  -1  -9  12   54.08    3.37
   1  -9 -12   44.06   10.82
  -1  -9  13   94.05    5.61
  -1  -9  13   94.99    4.54
  -1  -9  13   83.70    4.13
   1  -9 -13   78.07   14.50
   1  -9 -13  101.64    5.87
  -1  -9  14   46.36    4.28
  -1  -9  14   36.36    3.06
   1  -9 -14   38.45    3.93
   1  -9 -15   44.43    4.06
  -1  -9  15   46.95    3.50
   1  -9 -16   38.73    3.89
  -1  -9  16   36.23    3.26
   1  -9 -17   73.27    5.04
  -1  -9  17   70.45    4.30
   1  -9 -18   61.79    4.48
  -1  -9  18   53.82    3.80
  -1  -9  19  182.88    6.37
   1  -9 -19  187.45    7.11
   1  -9 -20    5.13    1.80
  -1  -9  20    3.13    1.61
  -1  -9  21   10.67    1.87
   1  -9 -21    9.11    1.83
  -1  -9  21   10.80    1.89
   1  -9 -22   22.41    2.06
  -1  -9  22   20.91    2.15
  -1  -9  22   21.61    2.20
  -1  -9  23   45.47    2.56
  -1  -9  23   45.28    2.63
  -1  -9  24   -0.63    0.70
  -1  -9  24   -1.17    1.07
  -1  -9  25    2.80    0.78
  -1  10  24    2.13    0.76
   1 -10  23   13.78    1.39
   1 -10  22    0.04    0.33
   1 -10  22    7.26    1.39
   1 -10  21    1.00    1.24
   1 -10  21    0.96    0.50
  -1 -10 -21    0.37    0.85
  -1 -10 -20   10.61    1.83
   1 -10  20    7.06    1.35
   1 -10  20    8.78    1.70
  -1 -10 -19    3.06    1.67
   1 -10  19    5.35    1.67
   1 -10  19    4.20    1.26
  -1 -10 -18    6.09    1.91
   1 -10  18    4.61    1.70
   1 -10  17   41.56    3.28
  -1 -10 -17   45.82    4.00
  -1 -10 -16   47.23    4.15
   1 -10  16   41.93    3.33
  -1 -10 -15   77.08    5.30
   1 -10  15   68.73    4.17
   1 -10  14   18.34    3.17
  -1 -10 -14   20.34    3.24
   1 -10  14   21.15    2.52
   1 -10  13  229.86    8.85
  -1 -10 -13  260.44    9.41
   1 -10  13  248.85    7.24
   1 -10  12    4.24    1.43
  -1 -10 -12    4.52    2.09
   1 -10  12    5.46    2.00
   1 -10  11   50.64    3.24
   1 -10  11   49.88    4.15
  -1 -10 -11   49.95    4.35
  -1 -10 -11   53.88   12.32
   1 -10  10  192.34    7.54
  -1 -10 -10  177.47   20.65
  -1 -10 -10  174.89    7.50
  -1 -10  -9   71.18    4.74
   1 -10   9   75.88    4.74
  -1 -10  -9   79.23   13.72
  -1 -10  -8   33.78    3.37
   1 -10   8   32.08    3.22
  -1 -10  -8   34.47    8.78
  -1 -10  -7   39.60    9.50
  -1 -10  -6   75.79   12.41
  -1 -10  -5  178.26   18.43
  -1 -10  -4  129.52   15.54
  -1 -10  -3  153.63   16.17
   1 -10   2  185.67   14.39
  -1 -10  -2  189.78   17.41
  -1 -10  -1   25.82    7.04
   1 -10   1   28.65    5.80
  -1 -10   0   35.49    7.61
   1 -10   0   35.97    7.09
   1 -10  -1   49.51    9.11
  -1 -10   1   37.45    7.50
   1 -10  -2  178.54   16.41
  -1 -10   2  184.36   15.61
  -1 -10   3  140.61   13.48
   1 -10  -3  138.13   14.78
  -1 -10   4  133.31   12.89
   1 -10  -4  149.93   16.30
   1 -10  -5  175.67   17.71
   1 -10  -6   76.58   12.48
   1 -10  -7   40.78    9.72
   1 -10  -8   34.71    3.26
   1 -10  -8   34.21    8.63
  -1 -10   8   38.91    3.35
   1 -10  -9   83.55   13.65
  -1 -10   9   81.07    4.80
   1 -10  -9   68.77    4.69
   1 -10 -10  177.67    7.52
   1 -10 -10  176.12   20.34
  -1 -10  10  201.45    7.59
   1 -10 -11   40.78    3.96
   1 -10 -11   48.88   11.69
  -1 -10  11   46.30    3.61
  -1 -10  11   45.25    3.91
  -1 -10  12    6.11    1.65
  -1 -10  12    4.67    1.56
  -1 -10  12    8.41    2.41
   1 -10 -12    7.39    2.43
   1 -10 -13  256.72    9.35
  -1 -10  13  225.20    8.67
  -1 -10  13  260.05    7.72
  -1 -10  13  243.74    7.65
  -1 -10  13  253.59    7.19
  -1 -10  14   16.35    2.24
  -1 -10  14   15.61    2.15
  -1 -10  14   14.06    2.83
  -1 -10  14   16.80    2.30
   1 -10 -14   15.61    2.87
  -1 -10  15   77.23    4.28
   1 -10 -15   78.81    5.37
  -1 -10  15   77.62    4.41
  -1 -10  16   48.49    3.50
  -1 -10  16   44.36    3.52
   1 -10 -16   50.21    4.39
  -1 -10  17   35.28    3.04
  -1 -10  17   41.56    3.24
   1 -10 -17   39.15    3.87
   1 -10 -18    8.48    2.35
  -1 -10  18    8.46    1.83
  -1 -10  18    7.78    1.83
   1 -10 -19    7.28    2.15
  -1 -10  19    6.91    1.65
  -1 -10  19    6.33    1.59
  -1 -10  20   10.80    1.74
  -1 -10  20   13.11    1.80
   1 -10 -20   10.15    2.02
  -1 -10  21    1.33    1.04
  -1 -10  21   -0.41    1.22
   1 -10 -21    3.11    1.37
  -1 -10  22    5.04    1.04
  -1 -10  22    7.80    1.30
   1 -10 -22    5.59    1.15
  -1 -10  23    9.63    1.00
  -1 -10  24    3.00    0.80
  -1  11  23   17.21    1.43
   1 -11  22    7.52    1.02
  -1  11  22    5.98    1.28
  -1 -11 -21    0.43    0.48
   1 -11  21    1.56    0.98
   1 -11  20   28.97    2.20
  -1 -11 -20   29.95    2.41
   1 -11  19   26.84    2.26
  -1 -11 -19   29.52    2.74
  -1 -11 -18   23.15    2.80
   1 -11  18   24.87    2.37
   1 -11  17    8.50    1.74
  -1 -11 -17    9.11    2.24
   1 -11  16    0.76    1.09
   1 -11  16    2.37    1.37
  -1 -11 -16    2.09    2.04
   1 -11  15   51.49    3.52
   1 -11  15   46.54    3.33
  -1 -11 -15   50.75    4.41
  -1 -11 -14  160.78    7.54
   1 -11  14  152.04    5.63
   1 -11  14  152.04    7.39
   1 -11  13  100.38    4.56
  -1 -11 -13  100.75    6.13
   1 -11  13   89.51    5.72
  -1 -11 -12   24.58    3.52
   1 -11  12   28.87    3.56
  -1 -11 -11   23.84    3.35
   1 -11  11   29.84    3.50
  -1 -11 -10   86.18    5.54
   1 -11  10   94.59    5.59
   1 -11   9    8.59    2.28
  -1 -11  -9   10.78    2.41
  -1 -11  -8   77.81    5.15
   1 -11   8   80.16    4.20
  -1 -11  -8   77.79    4.30
   1 -11   8   79.86    4.98
   1 -11   7   12.76    2.43
   1 -11   7    9.89    1.83
  -1 -11  -7   10.45    2.04
  -1 -11  -7   14.52    2.52
   1 -11   7    9.74    1.76
  -1 -11  -6   78.66   13.28
   1 -11   6   69.88    4.20
   1 -11   6   66.84    4.46
  -1 -11  -6   75.12    4.78
  -1 -11  -6   60.56    3.98
   1 -11   6   60.99    3.85
   1 -11   5  215.45    7.24
  -1 -11  -5  236.09    7.98
  -1 -11  -5  233.70    7.65
   1 -11   5  225.42    7.82
  -1 -11  -5  261.11   23.15
   1 -11   5  223.23    7.09
   1 -11   4   38.84    3.17
  -1 -11  -4   50.54    3.74
  -1 -11  -4   33.28    8.78
   1 -11   4   48.08    3.65
  -1 -11  -3    6.72    4.85
  -1 -11  -2    7.85    4.91
  -1 -11  -1   37.47    7.98
  -1 -11   0    2.11    3.65
   1 -11   0   -0.43    2.61
   1 -11  -1   53.01    9.19
  -1 -11   1   43.12    8.52
  -1 -11   2   14.52    5.24
   1 -11  -2   13.69    6.24
  -1 -11   3    5.15    3.87
   1 -11  -3   11.22    5.83
  -1 -11   4   57.38    3.87
   1 -11  -4   46.99    9.95
   1 -11  -5  220.12    7.61
  -1 -11   5  221.25    7.28
  -1 -11   5  238.40    7.80
   1 -11  -5  241.09    7.69
   1 -11  -5  230.20   20.84
  -1 -11   6   79.84    4.43
   1 -11  -6   76.16   12.61
   1 -11  -6   73.51    4.80
   1 -11  -6   69.14    4.17
  -1 -11   6   72.58    4.56
   1 -11  -7    6.56    5.37
   1 -11  -7    9.56    2.00
  -1 -11   7   13.08    2.33
  -1 -11   7    9.59    1.83
   1 -11  -7    9.69    2.11
   1 -11  -8   82.79    5.15
   1 -11  -8   79.03    4.26
  -1 -11   8   90.70    5.22
  -1 -11   8   85.36    4.39
   1 -11  -9   11.22    2.56
  -1 -11   9    9.74    2.24
   1 -11  -9   13.02    6.98
  -1 -11   9   10.35    2.28
   1 -11 -10  100.42    5.98
  -1 -11  10  105.51    5.50
  -1 -11  10  109.46    5.93
   1 -11 -11   21.56    3.15
  -1 -11  11   26.37    2.96
  -1 -11  11   27.87    3.30
   1 -11 -12   34.36    3.91
  -1 -11  12   31.69    3.15
  -1 -11  12   33.76    3.89
  -1 -11  13   90.66    4.93
   1 -11 -13   94.79    5.98
  -1 -11  13   88.68    5.61
  -1 -11  14  145.22    5.54
  -1 -11  14  160.32    7.46
  -1 -11  14  159.13    6.15
   1 -11 -14  161.52    7.50
   1 -11 -15   51.43    4.50
  -1 -11  15   44.73    3.17
  -1 -11  15   54.64    3.52
  -1 -11  16    1.74    1.13
  -1 -11  16    0.17    1.11
   1 -11 -16    3.26    2.26
   1 -11 -17   15.24    2.74
  -1 -11  17    9.17    1.67
  -1 -11  17   14.08    1.96
   1 -11 -18   22.13    2.80
  -1 -11  18   20.30    2.11
  -1 -11  18   21.11    2.09
  -1 -11  19   22.43    2.00
  -1 -11  19   21.71    1.98
   1 -11 -19   28.97    2.89
   1 -11 -20   34.41    2.76
  -1 -11  20   34.06    2.15
  -1 -11  20   32.17    2.20
   1 -11 -21    2.33    1.17
  -1 -11  21    0.43    0.33
  -1 -11  22    5.50    1.11
   1 -11 -22    0.48    0.43
   1  11  23   15.39    1.37
  -1  12  22    2.85    0.76
  -1  12  21   34.58    2.24
  -1  12  20   13.87    1.80
  -1 -12 -20   15.13    1.63
  -1 -12 -19    6.91    1.54
   1 -12  19    7.96    1.15
   1 -12  18    0.83    1.00
  -1 -12 -18    1.24    1.43
  -1 -12 -17    2.24    1.72
   1 -12  17    5.19    1.33
   1 -12  16   27.52    2.33
  -1 -12 -16   30.50    3.37
   1 -12  16   27.56    2.35
   1 -12  15    8.28    1.65
  -1 -12 -15   11.80    2.67
  -1 -12 -14  149.56    7.06
   1 -12  14  134.13    6.76
   1 -12  14  133.02    5.65
   1 -12  13    7.24    2.43
  -1 -12 -13    6.22    2.43
   1 -12  13    7.35    2.00
  -1 -12 -12   57.53    4.87
   1 -12  12   56.64    4.65
   1 -12  11   24.58    3.28
  -1 -12 -11   21.15    3.39
   1 -12  10   32.08    3.65
  -1 -12 -10   28.54    3.56
   1 -12   9  115.79    5.15
   1 -12   9  119.20    6.28
  -1 -12  -9  113.35    6.41
  -1 -12  -8   69.73    5.13
   1 -12   8   74.92    5.04
   1 -12   8   72.86    4.28
   1 -12   7  118.09    6.13
  -1 -12  -7  126.59    5.83
  -1 -12  -7  125.35    6.43
   1 -12   7  115.09    5.48
   1 -12   7  116.48    5.41
  -1 -12  -6  152.65    6.52
   1 -12   6  149.17    6.85
   1 -12   6  141.98    6.15
   1 -12   6  135.76    5.91
  -1 -12  -6  147.48    6.76
  -1 -12  -5  154.52    6.83
   1 -12   5  148.09    6.39
  -1 -12  -5  159.76    6.72
  -1 -12  -5  143.78   17.24
   1 -12   5  155.63    6.80
   1 -12   5  145.76    6.04
  -1 -12  -4   72.88    4.67
  -1 -12  -4   49.77   10.22
   1 -12   4   65.95    4.43
  -1 -12  -4   69.38    4.65
   1 -12   4   64.42    4.48
   1 -12   4   67.92    4.13
   1 -12   3   52.23    4.15
  -1 -12  -3   57.71    4.33
   1 -12   3   60.84    4.33
   1 -12   3   54.19    3.61
  -1 -12  -3   58.71    3.76
  -1 -12  -3   59.62    4.13
  -1 -12  -2   12.41    2.46
  -1 -12  -2   12.61    2.04
   1 -12   2   11.17    2.30
  -1 -12  -2    7.37    5.13
  -1 -12  -2   13.58    2.28
   1 -12   2   12.65    2.11
   1 -12   1  107.94    5.63
   1 -12   1  117.94    5.19
  -1 -12  -1  124.96    6.15
  -1 -12  -1  125.92    5.61
  -1 -12  -1  134.70    5.91
   1 -12   0  141.80    6.48
  -1 -12   0  171.36    6.78
  -1 -12   0  146.09   15.76
  -1 -12   0  150.35    6.78
  -1 -12   0  161.97    6.09
  -1 -12   1  131.04    6.15
   1 -12  -1   98.18   12.48
  -1 -12   1  112.66    5.06
  -1 -12   1  111.74    5.87
   1 -12  -1  123.50    6.02
  -1 -12   1  123.37   13.74
   1 -12  -1   93.22    4.65
  -1 -12   2   10.80    2.22
  -1 -12   2    6.24    1.93
   1 -12  -2    8.06    1.67
  -1 -12   2   12.06    2.48
   1 -12  -2    9.69    2.24
   1 -12  -2    5.50    1.35
   1 -12  -3   46.25    3.87
   1 -12  -3   43.28    3.24
  -1 -12   3   53.19    4.00
   1 -12  -3   37.34    8.72
  -1 -12   3   39.99    3.67
  -1 -12   3   47.06    3.98
   1 -12  -3   45.38    3.48
   1 -12  -4   65.51    4.48
   1 -12  -4   63.19   11.37
   1 -12  -4   67.66    4.33
  -1 -12   4   62.84    4.37
  -1 -12   4   60.97    4.46
  -1 -12   4   67.19    4.48
   1 -12  -5  159.43   17.85
   1 -12  -5  173.52    6.98
   1 -12  -5  161.58    6.80
  -1 -12   5  157.08    7.00
  -1 -12   5  169.73    6.83
  -1 -12   5  174.69    7.09
  -1 -12   6  126.31    6.37
  -1 -12   6  150.61    6.67
   1 -12  -6  141.87    6.54
  -1 -12   6  143.06    6.19
   1 -12  -6  145.54    6.33
  -1 -12   7  132.44    6.35
  -1 -12   7  112.18    6.00
  -1 -12   7  132.15    5.80
   1 -12  -7  125.11    6.26
   1 -12  -7  126.07    5.76
   1 -12  -8   69.73    4.28
  -1 -12   8   69.99    4.83
   1 -12  -8   72.58    4.98
  -1 -12   8   80.38    5.15
  -1 -12   8   71.82    4.28
  -1 -12   9  128.26    6.37
   1 -12  -9  135.26    5.59
  -1 -12   9  134.46    6.56
   1 -12  -9  127.87    6.61
  -1 -12  10   28.63    3.43
  -1 -12  10   27.50    3.15
   1 -12 -10   25.84    3.39
  -1 -12  11   18.48    2.67
   1 -12 -11   18.84    3.06
  -1 -12  11   25.24    3.24
   1 -12 -12   50.82    4.63
  -1 -12  12   56.43    4.52
  -1 -12  12   48.23    3.83
  -1 -12  13   10.24    2.72
   1 -12 -13    7.74    2.52
  -1 -12  13    6.04    1.76
  -1 -12  14  139.57    5.74
   1 -12 -14  149.78    7.09
  -1 -12  15    7.80    1.67
   1 -12 -15    8.69    2.52
   1 -12 -16   29.86    3.46
  -1 -12  16   29.84    2.39
   1 -12 -17    1.93    1.83
   1 -12 -18    0.41    1.59
   1 -12 -19   11.56    2.00
   1 -12 -20   13.63    1.74
   1  12  21   35.78    2.17
   1 -12 -21   33.26    1.91
  -1  13  20   21.78    1.59
  -1  13  19   16.17    1.67
  -1 -13 -19   16.65    1.70
  -1  13  18   24.82    2.24
  -1 -13 -18   27.50    2.43
  -1  13  17    3.50    1.41
  -1 -13 -17    3.96    1.70
   1 -13  16    1.61    1.07
  -1  13  16    1.74    1.30
  -1 -13 -16    1.52    1.76
  -1  13  15   -0.35    1.37
  -1 -13 -15    0.54    1.78
   1 -13  15    0.11    1.20
  -1  13  14   37.43    3.28
  -1 -13 -14   51.34    4.17
   1 -13  14   40.47    3.15
  -1  13  13   24.26    2.83
  -1 -13 -13   29.67    3.61
   1 -13  13   24.41    2.74
   1 -13  13   25.54    3.28
  -1 -13 -12    4.30    2.37
  -1  13  12    3.48    1.59
   1 -13  12    4.54    1.91
   1 -13  12    4.96    2.26
  -1 -13 -11    6.50    2.43
   1 -13  11    6.61    2.33
  -1  13  11    5.56    1.83
   1 -13  11    4.15    1.91
   1 -13  10   10.76    2.37
  -1 -13 -10   13.35    2.85
  -1  13  10    7.91    1.93
   1 -13  10    9.32    2.50
   1 -13   9   53.75    3.56
   1 -13   9   44.41    4.04
  -1 -13  -9   41.54    4.22
  -1  13   9   42.41    3.59
   1 -13   8   39.86    3.93
   1 -13   8   47.51    3.67
  -1 -13  -8   44.49    4.20
   1 -13   7   21.37    2.70
  -1 -13  -7   15.71    2.89
   1 -13   7   19.41    3.13
   1 -13   6   63.69    4.35
   1 -13   6   54.06    4.41
   1 -13   6   52.62    3.76
  -1 -13  -6   61.16    4.43
  -1 -13  -6   58.88    4.54
  -1 -13  -5   17.02    2.61
  -1 -13  -5   20.82    3.02
   1 -13   5   22.69    2.76
   1 -13   5   18.54    2.65
   1 -13   5   25.13    3.26
   1 -13   4   30.34    3.37
  -1 -13  -4   33.36    3.41
   1 -13   4   33.17    3.50
   1 -13   4   28.97    2.89
  -1 -13  -4   34.56    3.70
   1 -13   3   22.54    2.54
  -1 -13  -3   26.65    3.35
  -1 -13  -3   26.95    2.85
   1 -13   3   24.28    3.06
  -1 -13  -3   28.08    3.24
   1 -13   3   28.10    3.26
   1 -13   2   37.15    3.70
  -1 -13  -2   36.95    3.35
  -1 -13  -2   34.73    3.30
   1 -13   2   31.19    3.46
   1 -13   2   33.17    3.09
  -1 -13  -2   29.91    3.52
  -1 -13  -1   75.10    4.69
   1 -13   1   76.05    4.37
  -1 -13  -1   76.51    5.22
   1 -13   1   67.49    4.74
  -1 -13  -1   71.38    4.48
   1 -13   1   77.53    5.09
  -1 -13   0   21.54    2.52
  -1 -13   0   26.60    3.11
  -1 -13   0   24.52    3.33
   1 -13   0   25.43    3.20
   1 -13   0   24.80    2.70
   1 -13   0   23.91    2.85
   1 -13  -1   57.82    3.83
  -1 -13   1   54.17    4.11
  -1 -13   1   62.29    4.50
   1 -13  -1   56.97    3.98
  -1 -13   1   56.75    4.50
   1 -13  -1   58.75    4.50
  -1 -13   2   35.10    3.67
  -1 -13   2   32.49    3.59
   1 -13  -2   28.87    2.85
   1 -13  -2   31.15    2.93
  -1 -13   2   36.08    3.63
   1 -13  -2   31.17    2.87
   1 -13  -2   31.67    3.59
   1 -13  -3   22.78    3.04
  -1 -13   3   28.21    3.28
   1 -13  -3   22.56    2.59
  -1 -13   3   21.95    3.02
  -1 -13   3   25.63    3.37
   1 -13  -3   27.15    2.85
   1 -13  -4   28.06    3.00
  -1 -13   4   23.39    3.00
  -1 -13   4   28.21    3.15
   1 -13  -4   27.50    3.22
   1 -13  -4   29.84    2.91
  -1 -13   4   24.19    3.17
   1 -13  -5   21.52    2.89
   1 -13  -5   22.39    3.00
  -1 -13   5   20.67    3.00
  -1 -13   5   22.11    2.91
  -1 -13   5   27.19    3.24
   1 -13  -5   18.98    2.37
   1 -13  -6   55.69    4.20
  -1 -13   6   55.60    4.09
   1 -13  -6   55.71    4.33
  -1 -13   6   56.45    4.35
  -1 -13   6   45.56    4.11
  -1 -13   7   19.39    3.00
   1 -13  -7   16.04    2.46
   1 -13  -7   16.89    2.78
  -1 -13   7   17.39    2.80
  -1 -13   8   37.97    3.76
   1 -13  -8   33.04    3.56
  -1 -13   8   34.23    3.59
   1 -13  -8   42.78    3.50
  -1 -13   9   51.45    4.35
   1 -13  -9   54.08    4.52
   1 -13  -9   55.75    3.74
  -1 -13   9   50.47    4.20
   1 -13 -10   10.11    2.72
  -1 -13  10    5.96    2.13
  -1 -13  10    8.76    2.39
  -1 -13  11    5.89    2.28
  -1 -13  11    2.63    1.78
   1 -13 -11    5.78    2.52
  -1 -13  12    5.96    1.87
  -1 -13  12    5.46    2.26
   1 -13 -12    5.87    2.48
  -1 -13  13   24.97    2.76
   1 -13 -13   22.47    3.22
  -1 -13  13   21.21    3.11
   1 -13 -14   36.62    3.78
  -1 -13  14   41.78    3.15
   1 -13 -15   -0.33    2.00
  -1 -13  15    0.91    1.13
   1 -13 -16    0.20    1.70
  -1 -13  16    2.46    0.96
   1 -13 -17    5.02    1.80
   1 -13 -18   31.21    2.61
   1  13  18   29.76    2.30
   1 -13 -19   17.95    1.87
   1  13  19   17.43    1.61
   1 -13 -20   20.15    1.54
   1  13  20   14.11    1.20
  -1  14  18   23.26    1.56
  -1 -14 -18   35.08    2.11
  -1 -14 -17   20.69    2.06
  -1  14  17   21.06    1.78
  -1 -14 -16   16.28    2.13
  -1  14  16   15.02    1.70
   1 -14  16   20.98    1.67
  -1 -14 -15   60.64    3.98
   1 -14  15   57.56    3.02
  -1  14  15   55.82    3.17
  -1 -14 -14   19.54    2.76
   1 -14  14   15.93    2.04
  -1  14  14   14.58    1.96
  -1 -14 -13   31.06    3.39
  -1  14  13   28.08    2.61
   1 -14  13   29.15    2.72
   1 -14  13   30.28    3.28
   1 -14  12   10.13    2.41
  -1 -14 -12   10.39    2.67
  -1  14  12    8.46    1.70
   1 -14  12   12.67    2.13
   1 -14  11   21.80    2.85
   1 -14  11   22.26    3.13
  -1  14  11   17.32    2.13
  -1 -14 -11   19.87    3.00
  -1 -14 -10   19.74    3.15
  -1  14  10   16.26    2.13
   1 -14  10   21.00    3.06
   1 -14  10   22.45    3.02
   1 -14   9   32.54    3.37
  -1 -14  -9   27.34    3.39
   1 -14   9   33.91    3.61
   1 -14   8   45.45    4.04
  -1 -14  -8   48.47    4.17
   1 -14   8   47.41    3.54
   1 -14   8   45.47    4.06
   1 -14   7   49.47    4.33
   1 -14   7   58.86    4.06
   1 -14   7   58.93    4.54
  -1 -14  -7   54.45    4.43
   1 -14   6   64.49    4.41
   1 -14   6   70.49    4.96
  -1 -14  -6   64.23    4.59
   1 -14   6   64.23    4.72
   1 -14   5   30.50    3.50
   1 -14   5   36.60    3.52
   1 -14   5   40.04    3.91
  -1 -14  -5   36.58    3.65
   1 -14   4  104.61    5.83
   1 -14   4  100.94    5.78
   1 -14   4  101.01    5.67
  -1 -14  -4  102.72    5.56
   1 -14   4  100.31    5.09
   1 -14   3   64.14    4.65
   1 -14   3   64.82    4.72
   1 -14   3   72.16    4.96
  -1 -14  -3   64.64    4.41
  -1 -14  -3   66.69    4.00
   1 -14   3   62.08    4.02
  -1 -14  -3   65.10    4.87
   1 -14   2   24.24    3.09
   1 -14   2   25.13    3.22
  -1 -14  -2   23.37    2.80
   1 -14   2   22.04    3.15
   1 -14   2   22.00    2.59
  -1 -14  -2   22.61    3.33
  -1 -14  -2   23.06    2.67
   1 -14   1   22.26    2.96
  -1 -14  -1   19.37    2.56
   1 -14   1   18.84    2.93
   1 -14   1   19.71    2.98
  -1 -14  -1   22.04    2.98
  -1 -14  -1   25.76    2.93
   1 -14   1   21.65    2.48
  -1 -14  -1   20.91    3.11
   1 -14   0    7.39    2.39
   1 -14   0    7.09    2.09
  -1 -14   0    5.91    2.39
  -1 -14   0    6.76    1.74
  -1 -14   0    3.74    1.67
   1 -14   0    7.13    1.72
   1 -14   0    6.74    1.87
  -1 -14   0    9.00    2.20
   1 -14  -1   20.65    2.63
  -1 -14   1   21.39    2.96
   1 -14  -1   22.00    2.48
   1 -14  -1   20.82    3.17
  -1 -14   1   22.63    2.91
  -1 -14   1   19.89    3.11
  -1 -14   2   20.04    3.06
  -1 -14   2   20.93    3.06
   1 -14  -2   20.91    2.46
   1 -14  -2   21.78    2.52
  -1 -14   2   27.34    3.30
   1 -14  -2   21.52    2.52
   1 -14  -2   23.58    3.13
   1 -14  -3   74.73    4.26
  -1 -14   3   64.38    4.72
   1 -14  -3   73.18    4.98
   1 -14  -3   73.12    4.39
  -1 -14   3   67.01    4.80
  -1 -14   3   74.18    4.89
   1 -14  -4  105.09    5.11
  -1 -14   4   95.25    5.72
  -1 -14   4  101.38    5.72
   1 -14  -4  100.70    5.30
  -1 -14   4   98.92    5.56
   1 -14  -4  109.20    5.87
  -1 -14   5   43.88    4.02
   1 -14  -5   36.26    3.61
   1 -14  -5   40.21    3.61
   1 -14  -5   38.43    3.24
  -1 -14   5   36.30    3.78
   1 -14  -6   71.01    4.22
  -1 -14   6   62.71    4.74
  -1 -14   6   81.68    5.06
   1 -14  -6   68.79    4.61
   1 -14  -6   70.32    4.61
   1 -14  -7   58.10    4.35
   1 -14  -7   61.79    4.15
  -1 -14   7   51.99    4.35
  -1 -14   7   53.99    4.30
   1 -14  -7   62.38    3.96
   1 -14  -8   46.10    3.93
  -1 -14   8   41.86    3.98
  -1 -14   8   43.47    3.85
   1 -14  -8   50.80    3.61
   1 -14  -8   48.30    3.65
   1 -14  -9   27.37    3.30
   1 -14  -9   32.28    2.89
  -1 -14   9   28.28    3.35
  -1 -14   9   30.30    3.37
   1 -14 -10   21.82    3.06
  -1 -14  10   26.30    3.04
  -1 -14  10   20.13    2.91
  -1 -14  11   20.80    2.67
   1 -14 -11   20.06    3.04
  -1 -14  11   21.76    2.98
   1 -14 -12    9.30    2.37
  -1 -14  12   10.41    2.33
  -1 -14  12   10.17    2.04
   1 -14 -13   32.49    3.43
  -1 -14  13   31.71    2.83
  -1 -14  14   15.69    1.96
   1 -14 -14   15.15    2.52
   1  14  14   12.35    1.59
  -1 -14  15   60.66    3.00
   1  14  15   50.41    2.76
   1 -14 -15   60.14    3.91
   1 -14 -16   19.28    2.26
   1  14  16   15.52    1.54
   1  14  17   19.61    1.52
   1 -14 -17   24.04    2.20
   1 -14 -18   34.34    2.22
  -1 -15 -17   28.34    1.70
  -1 -15 -16   31.56    2.15
  -1  15  15   20.08    1.41
  -1 -15 -15   28.15    2.30
   1 -15  15   25.15    1.74
  -1  15  14    5.93    1.02
   1 -15  14    4.93    1.20
  -1 -15 -14    6.39    1.74
   1 -15  13    3.70    1.28
  -1 -15 -13    5.35    1.87
  -1 -15 -12    9.24    2.17
   1 -15  12    9.41    2.04
   1 -15  12   11.39    2.02
  -1 -15 -11   13.89    2.41
   1 -15  11    9.63    2.24
   1 -15  11   13.08    2.20
   1 -15  10   21.45    2.85
  -1 -15 -10   20.17    2.83
   1 -15  10   20.93    2.67
   1 -15   9   53.23    3.93
  -1 -15  -9   53.69    4.09
   1 -15   9   52.93    4.15
  -1 -15  -8    7.89    2.15
   1 -15   8   10.32    2.46
   1 -15   8    7.11    2.24
   1 -15   7    3.13    1.87
   1 -15   7    5.43    2.13
  -1 -15  -7    2.46    1.67
   1 -15   6   20.24    2.91
   1 -15   6   19.84    2.91
  -1 -15  -6   19.58    2.74
   1 -15   6   20.15    2.67
   1 -15   5   41.69    3.91
  -1 -15  -5   45.95    3.72
   1 -15   5   48.43    3.87
   1 -15   5   41.15    3.80
   1 -15   4   11.43    2.50
  -1 -15  -4   13.17    2.30
   1 -15   4   13.80    2.61
   1 -15   4   11.15    2.39
  -1 -15  -3    9.02    2.02
  -1 -15  -3    7.26    1.96
   1 -15   3    7.80    2.26
   1 -15   3    9.48    2.52
   1 -15   3    8.06    2.13
   1 -15   3    8.54    1.80
   1 -15   2   26.58    3.28
  -1 -15  -2   38.15    3.52
   1 -15   2   33.54    2.96
   1 -15   2   37.58    3.76
  -1 -15  -2   35.21    2.98
  -1 -15  -2   31.41    3.04
   1 -15   2   35.71    3.43
  -1 -15  -1   35.78    3.17
   1 -15   1   39.47    3.15
   1 -15   1   41.82    3.87
   1 -15   1   34.49    3.65
   1 -15   1   39.39    3.54
  -1 -15  -1   39.84    3.24
  -1 -15  -1   41.54    3.72
  -1 -15   0    0.26    1.22
   1 -15   0   -0.70    2.02
  -1 -15   0   -1.41    1.96
  -1 -15   0   -0.52    1.54
   1 -15   0   -0.09    2.04
   1 -15   0   -1.24    1.54
   1 -15   0   -0.61    1.11
   1 -15  -1   41.95    3.41
   1 -15  -1   37.97    3.76
   1 -15  -1   38.43    3.06
  -1 -15   1   39.91    3.59
   1 -15  -1   38.62    3.76
  -1 -15   1   37.08    3.56
  -1 -15   2   33.02    3.46
  -1 -15   2   37.62    3.54
   1 -15  -2   32.28    3.59
   1 -15  -2   35.36    3.63
   1 -15  -2   32.93    2.83
   1 -15  -2   33.41    2.89
  -1 -15   3    9.09    2.28
   1 -15  -3   10.04    1.87
   1 -15  -3   10.26    1.83
   1 -15  -3    7.04    2.33
  -1 -15   3   11.06    2.48
   1 -15  -4   13.61    2.13
  -1 -15   4   12.74    2.50
   1 -15  -4    9.52    2.48
   1 -15  -4   14.56    2.00
  -1 -15   4   10.00    2.48
   1 -15  -5   52.27    3.74
  -1 -15   5   49.97    4.00
  -1 -15   5   45.75    4.11
   1 -15  -5   52.32    4.00
   1 -15  -5   52.19    3.43
  -1 -15   6   17.78    2.89
   1 -15  -6   20.41    2.78
  -1 -15   6   19.13    2.72
   1 -15  -6   19.65    2.15
   1 -15  -6   18.82    2.61
  -1 -15   7    5.85    2.09
   1 -15  -7    6.41    1.46
  -1 -15   7    5.80    2.17
   1 -15  -7    6.72    1.96
  -1 -15   8    7.63    2.33
   1 -15  -8    8.93    2.06
   1 -15  -8    6.06    1.37
  -1 -15   8    5.83    1.98
  -1 -15   9   48.23    3.85
  -1 -15   9   50.67    3.87
   1 -15  -9   49.88    3.80
   1 -15  -9   46.06    3.00
  -1 -15  10   26.63    2.96
   1 -15 -10   25.76    2.17
   1 -15 -10   22.95    2.78
  -1 -15  10   29.30    3.02
   1 -15 -11   13.65    2.37
  -1 -15  11   13.26    2.28
  -1 -15  11   15.82    2.30
   1 -15 -11   11.98    1.46
   1 -15 -12    6.67    1.89
  -1 -15  12    7.30    1.70
   1 -15 -13    0.83    1.48
  -1 -15  13    3.26    1.26
   1 -15 -14    6.39    1.70
   1 -15 -15   21.52    2.17
   1 -15 -16   37.78    2.37
   1 -15 -17   34.30    1.91
  -1 -16 -15    6.72    1.00
  -1 -16 -14   10.48    1.37
   1 -16  13   32.08    2.02
  -1 -16 -13   30.10    2.33
  -1 -16 -12    0.43    0.93
  -1 -16 -12    2.59    1.39
   1 -16  12    2.74    1.09
   1 -16  11   35.56    2.63
  -1 -16 -11   28.95    2.65
   1 -16  11   33.76    2.78
  -1 -16 -11   25.15    2.20
   1 -16  10   17.63    2.15
   1 -16  10   17.63    2.24
  -1 -16 -10   18.30    2.35
  -1 -16 -10   13.17    1.85
  -1 -16  -9   26.56    2.50
  -1 -16  -9   28.47    2.78
   1 -16   9   34.45    2.93
   1 -16   9   29.56    2.80
   1 -16   8   84.73    4.41
  -1 -16  -8   86.88    4.41
   1 -16   8   82.62    4.50
  -1 -16  -8   79.53    4.20
  -1 -16  -7    5.43    1.80
   1 -16   7    5.69    1.87
   1 -16   7    4.26    1.80
  -1 -16  -7    4.87    1.63
   1 -16   6   13.56    2.24
  -1 -16  -6   14.13    2.15
  -1 -16  -6   12.85    2.13
   1 -16   6   11.30    2.26
   1 -16   5   44.04    3.48
   1 -16   5   40.62    3.52
  -1 -16  -5   43.52    3.39
  -1 -16  -5   44.12    3.30
   1 -16   4    4.13    1.76
  -1 -16  -4    5.83    1.83
  -1 -16  -4    6.56    1.85
   1 -16   4    5.37    2.11
   1 -16   3   19.54    2.56
  -1 -16  -3   16.45    2.46
   1 -16   3   18.50    2.72
  -1 -16  -3   15.58    2.11
   1 -16   2   34.28    3.09
  -1 -16  -2   33.41    2.72
   1 -16   2   33.65    3.30
  -1 -16  -2   32.26    3.09
   1 -16   2   32.43    3.39
   1 -16   1   16.17    2.22
   1 -16   1   11.67    2.35
  -1 -16  -1   14.26    2.41
   1 -16   1   15.37    2.61
   1 -16   0    0.74    1.13
  -1 -16   0    1.33    1.50
   1 -16   0    0.87    1.96
  -1 -16   0    1.35    1.65
   1 -16   0    0.61    1.24
   1 -16   0   -1.11    1.80
   1 -16  -1   14.74    2.46
   1 -16  -1   14.24    1.96
  -1 -16   1   13.93    2.28
   1 -16  -1   14.76    1.89
  -1 -16   1   17.52    2.52
   1 -16  -1   14.00    2.61
   1 -16  -2   41.47    3.65
   1 -16  -2   36.65    2.65
  -1 -16   2   36.67    3.35
  -1 -16   2   36.56    3.39
   1 -16  -3   18.13    2.00
  -1 -16   3   17.15    2.56
   1 -16  -3   16.45    2.52
  -1 -16   3   18.50    2.56
   1 -16  -4    5.28    1.30
   1 -16  -4    4.28    1.35
  -1 -16   4    3.76    1.76
   1 -16  -4    1.98    1.78
  -1 -16   4    4.37    1.87
   1 -16  -5   42.49    3.54
  -1 -16   5   44.49    3.65
   1 -16  -5   42.10    2.98
   1 -16  -5   40.67    2.59
  -1 -16   5   37.71    3.20
  -1 -16   6   11.45    2.26
   1 -16  -6   13.22    2.35
   1 -16  -6   13.56    2.00
  -1 -16   6   13.95    2.24
   1 -16  -7    7.00    1.61
  -1 -16   7    6.93    1.85
  -1 -16   7    5.22    1.89
  -1 -16   8   77.81    4.20
  -1 -16   8   82.77    4.43
   1 -16  -8   75.62    3.98
  -1 -16   9   25.84    2.65
  -1 -16   9   25.37    2.59
   1 -16  -9   27.47    2.54
  -1 -16  10   19.71    2.28
   1 -16 -10   18.32    2.15
  -1 -16  10   19.61    2.30
  -1 -16  11   34.65    2.59
   1 -16 -11   30.43    2.54
   1 -16 -12    4.30    1.39
   1 -16 -13   35.43    2.37
   1 -16 -14   10.15    1.30
   1 -16 -15    7.24    1.02
  -1 -17 -11    9.02    1.26
   1 -17  10   82.27    3.22
  -1 -17 -10   75.31    3.09
  -1 -17  -9   -0.30    0.89
   1 -17   9    1.09    1.13
  -1 -17  -9    2.04    1.15
   1 -17   9    0.96    1.02
  -1 -17  -8   21.58    2.00
   1 -17   8   24.41    2.30
  -1 -17  -8   17.37    1.76
   1 -17   8   27.50    2.30
   1 -17   7   17.43    1.98
   1 -17   7   15.08    1.96
  -1 -17  -7   15.13    1.83
  -1 -17  -7   17.21    1.83
   1 -17   6   49.08    3.13
  -1 -17  -6   41.99    2.78
   1 -17   6   47.69    3.13
   1 -17   5   11.82    1.89
   1 -17   5   11.04    1.85
  -1 -17  -5   11.11    1.74
   1 -17   4    9.41    1.83
  -1 -17  -4    8.28    1.70
   1 -17   4    9.48    1.78
   1 -17   3    6.61    1.74
  -1 -17  -3    3.30    1.41
   1 -17   3    2.20    1.33
  -1 -17  -2   11.82    1.89
   1 -17   2   13.78    1.89
   1 -17   2   12.24    2.09
  -1 -17  -1   24.54    2.43
   1 -17   1   22.39    2.54
   1 -17   1   21.54    2.06
   1 -17   0    1.59    1.63
  -1 -17   0    1.59    1.37
  -1 -17   1   21.06    2.35
   1 -17  -1   22.76    2.56
   1 -17  -2   11.52    1.98
  -1 -17   2   13.02    2.00
   1 -17  -3    0.52    1.52
  -1 -17   3    3.91    1.48
   1 -17  -4    9.80    1.89
  -1 -17   4    9.82    1.80
   1 -17  -5   11.35    1.91
  -1 -17   5   12.61    1.89
   1 -17  -6   43.82    3.04
   1 -17  -6   41.30    2.37
  -1 -17   6   42.43    2.91
   1 -17  -7   16.45    1.98
  -1 -17   7   16.65    1.96
   1 -17  -7   15.95    1.63
  -1 -17   8   21.61    2.09
   1 -17  -8   17.58    1.70
   1 -17  -8   20.71    2.06
   1 -17  -9    0.70    1.00
   1 -17  -9    0.07    0.80
   1 -17 -10   62.62    2.96
   1 -17 -10   71.03    2.80
   1 -17 -11    5.37    0.89
   1 -17 -11    7.04    1.13
   1 -18   7   16.71    1.52
   1 -18   6   24.28    1.83
  -1 -18  -6   15.85    1.28
  -1 -18  -5   16.48    1.39
   1 -18   5   19.28    1.76
   1 -18   4    4.87    1.17
  -1 -18  -4    3.96    1.00
  -1 -18  -3   10.56    1.37
   1 -18   3   10.09    1.50
  -1 -18  -2    0.78    0.85
   1 -18   2   -0.17    1.07
  -1 -18  -1    6.26    1.22
   1 -18   1    4.93    1.30
   1 -18   0   19.06    1.91
  -1 -18   0   17.32    1.67
  -1 -18   1    6.43    1.20
   1 -18  -1    9.87    1.59
  -1 -18   2    1.00    0.96
   1 -18  -2    1.20    1.09
   1 -18  -3   12.78    1.63
  -1 -18   3    7.98    1.30
  -1 -18   4    6.04    1.15
   1 -18  -4    5.76    1.22
  -1 -18   5   22.58    1.74
   1 -18  -5   23.52    1.83
   1 -18  -6   18.65    1.59
  -1 -18   6   18.02    1.50
   1 -18  -7   11.98    1.22
  -2   0   0 1841.43   22.04
  -2   0   1  110.48    5.41
  -2   0  -1  112.68    4.46
  -2   0  -1  112.61    5.63
  -2   0  -2  380.22   10.39
  -2   0   2  374.46    9.52
  -2   0  -2  392.29   10.26
  -2   0  -2  390.35    7.65
  -2   0   3 1625.68   19.50
  -2   0   3 1590.21   23.97
  -2   0  -3 1702.72   23.87
  -2   0  -3 1656.96   22.04
  -2   0  -3 1660.50   15.80
  -2   0  -4 4329.72   36.78
  -2   0  -4 4447.18   43.08
  -2   0   4 4273.32   41.78
  -2   0   4 4317.27   30.86
  -2   0  -4 4366.98   27.30
  -2   0   5  893.08   13.41
  -2   0   5  891.88   20.24
  -2   0  -5  854.61   13.11
  -2   0  -5  914.01   17.43
  -2   0  -5  889.45   21.17
  -2   0   6  342.43   13.32
  -2   0   6  354.58    7.98
  -2   0  -6  361.51   11.13
  -2   0  -6  345.92   14.58
  -2   0   7  612.41    9.50
  -2   0  -7  643.23   21.50
  -2   0  -8  197.82   13.52
  -2   0   8  226.31   11.87
  -2   0   9  793.36   23.06
  -2   0  -9  721.30   26.19
  -2   0 -10  915.03   31.84
  -2   0  10 1031.21   27.21
  -2   0 -11  261.16   18.37
  -2   0  11  273.81   14.74
  -2   0 -12  124.18   13.61
  -2   0  12  123.24   10.11
  -2   0  13  259.87   15.06
  -2   0 -13  285.59   21.21
  -2   0  14  843.28   28.02
  -2   0 -14  825.13   37.41
  -2   0 -15  748.47   37.06
  -2   0 -16   27.93    9.04
   2   0 -16   34.32    9.95
  -2   0 -17   33.73    9.61
   2   0 -17   39.23   10.39
  -2   0 -18    7.69    6.96
   2   0  18    7.06    1.52
  -2   0 -18    8.32    2.39
  -2   0  18    8.74    1.83
  -2   0  18    8.52    2.11
  -2   0  19   13.41    2.50
   2   0  19   16.48    2.59
   2   0 -19   22.89    8.61
   2   0  19   16.13    2.11
  -2   0  19   16.04    2.30
  -2   0 -19   10.04    6.65
  -2   0 -19   15.32    2.67
   2   0  20   16.15    2.67
  -2   0  20   12.67    2.20
  -2   0 -20   17.78    2.93
  -2   0  20   17.61    2.87
   2   0  20   15.19    2.11
  -2   0 -21   88.99    5.63
  -2   0  21   86.70    4.93
  -2   0  21   82.60    5.24
   2   0  21   85.47    5.30
   2   0  21   79.25    4.26
  -2   0  21   78.01    4.54
   2   0  22   10.74    2.41
   2   0  22    8.93    1.78
  -2   0  22    8.78    2.33
  -2   0  22    9.95    2.09
  -2   0 -22    6.78    2.26
  -2   0  23    3.00    1.63
   2   0  23    3.09    1.46
   2   0  23    5.37    2.06
  -2   0  23    3.30    1.93
  -2   0 -23    2.96    1.74
  -2   0  24   14.82    2.02
   2   0  24   14.58    2.59
  -2   0  24   15.48    2.56
   2   0  25    8.19    2.00
  -2   0  25    9.93    1.61
  -2   0  25    9.43    2.11
  -2   0  26    8.35    1.76
   2   0  26   10.00    1.83
  -2   0  27    1.87    1.15
   2   0  27    0.15    1.04
   2   0  28    0.72    0.65
  -2   0  28    0.78    0.83
  -2   1  28    0.20    0.57
   2  -1  28    0.41    0.80
   2  -1  27    6.26    1.48
  -2   1  27    5.41    1.30
   2  -1  26   19.98    2.35
  -2   1  26   21.28    2.35
  -2   1  25   24.91    2.76
  -2  -1 -25   24.67    2.59
   2  -1  25   27.47    2.93
   2  -1  25   22.91    2.09
   2  -1  24  110.72    5.61
  -2  -1 -24  105.18    5.41
  -2   1  24  104.66    5.30
   2  -1  24  102.09    4.48
  -2  -1 -23  139.85    6.74
   2  -1  23  140.63    5.52
  -2   1  23  140.07    6.39
   2  -1  23  135.61    6.39
  -2   1  22   65.23    3.96
   2  -1  22   66.55    4.06
  -2  -1 -22   63.73    4.87
  -2   1  22   60.01    4.41
   2  -1  22   67.38    4.78
   2  -1  21    1.83    1.54
   2  -1  21    2.24    1.91
  -2  -1 -21    0.22    1.93
  -2   1  21    2.87    1.56
  -2   1  21   -0.20    1.63
  -2   1  20    3.48    1.46
  -2   1  20    4.24    1.85
   2  -1  20    3.06    1.80
  -2   1  20    5.91    1.76
   2  -1  20    3.89    1.54
  -2  -1 -20    4.74    2.24
  -2   1  19   95.29    4.78
   2   1 -19  110.57   16.52
  -2   1  19  103.44    5.15
  -2  -1 -19   96.07    5.91
  -2   1  19  100.16    5.52
   2  -1  19   96.68    4.76
   2  -1  19   89.86    5.28
  -2  -1 -19   89.05   14.63
  -2  -1 -18  152.22    7.17
  -2   1  18  149.50    5.76
  -2   1  18  152.93    6.56
   2  -1  18  154.50    5.76
  -2  -1 -18  163.87   19.89
   2   1 -17   57.53   12.00
  -2  -1 -17   51.17   11.56
  -2  -1 -16   24.15    8.59
  -2  -1 -15  268.52   22.84
  -2  -1 -14   23.84    7.67
  -2   1  13  372.16   17.85
  -2  -1 -13  381.70   24.95
  -2  -1 -12   30.60    7.67
  -2   1  12   29.89    5.43
  -2   1  11   54.64    6.93
  -2  -1 -11   51.84    9.82
  -2   1  10  221.36   12.72
  -2  -1 -10  219.84   16.58
  -2  -1  -9  541.61   23.54
  -2   1   9  585.28   19.76
  -2   1   8  180.58   10.82
  -2  -1  -8  149.43   11.95
  -2  -1  -7  679.26   22.65
  -2   1   7  658.70   19.52
  -2  -1  -6 2304.41   38.25
  -2  -1  -5    5.50    2.09
  -2  -1  -5    3.74    3.09
  -2  -1  -4  661.64   17.26
  -2  -1  -4  629.73   13.74
  -2  -1  -3 3133.73   33.97
  -2  -1  -3 3186.46   29.45
  -2  -1  -2  135.31    6.85
  -2  -1  -2  137.98    4.46
  -2  -1  -2  135.67    6.06
  -2  -1  -1  481.77   12.43
  -2  -1  -1  486.32    9.43
  -2  -1   0    4.37    1.59
  -2  -1   0    3.09    2.09
  -2  -1   1  460.97   11.65
  -2  -1   1  435.54   11.19
  -2  -1   2  154.52    7.24
  -2  -1   2  150.11    6.61
  -2   1  -2  148.78    5.85
  -2  -1   3 3218.03   26.30
  -2   1  -3 3227.07   31.34
  -2  -1   3 3179.29   28.78
  -2   1  -4  637.88   15.89
  -2  -1   4  632.32   16.54
  -2   1  -5    7.46    3.06
  -2   1  -5    9.48    2.39
  -2  -1   5   11.13    3.33
  -2  -1   6 2298.65   34.73
  -2   1  -6 2289.34   27.19
  -2  -1   7  700.24   20.08
  -2   1  -7  703.80   15.04
  -2  -1   8  154.65   10.00
  -2   1  -8  136.61   11.15
  -2   1  -8  159.87    7.17
  -2  -1   9  608.41   20.74
  -2   1  -9  536.46   22.93
  -2   1 -10  220.38   15.89
  -2  -1  10  245.85   13.76
  -2   1 -11   47.14    8.85
  -2  -1  11   50.58    6.76
  -2  -1  12   26.34    5.24
  -2   1 -12   23.47    6.93
  -2   1 -13  372.77   23.93
  -2  -1  13  397.55   19.11
  -2   1 -14   21.67    7.32
  -2  -1  14   21.30    4.93
  -2   1 -15  239.03   20.93
   2  -1 -15  283.80   22.45
   2  -1 -16   29.58    8.26
  -2   1 -16   26.60    7.89
  -2  -1  17   61.06    4.15
   2  -1 -17   50.34   11.22
  -2   1 -17   49.56   11.17
  -2   1 -18  139.28    6.43
  -2   1 -18  165.04   19.80
  -2  -1  18  146.39    6.59
  -2  -1  18  148.06    6.02
   2  -1 -18  165.00   18.69
   2  -1 -19   96.31   14.52
  -2   1 -19   76.62   14.08
  -2   1 -19  105.90    5.74
  -2  -1  19   98.07    5.00
   2   1  19   98.83    5.37
  -2  -1  19  107.94    5.89
  -2  -1  20    7.09    1.91
   2   1  20    8.67    2.17
  -2  -1  20   10.17    2.43
  -2   1 -20    4.98    1.74
  -2  -1  21    0.63    1.72
   2   1  21    2.17    1.74
  -2  -1  21    0.13    1.63
  -2  -1  22   50.64    4.22
   2   1  22   52.60    4.13
  -2  -1  22   53.51    4.04
  -2  -1  22   53.67    3.89
  -2  -1  23  144.85    6.63
   2   1  23  144.80    6.41
  -2  -1  23  147.28    6.09
  -2  -1  24  113.33    5.09
  -2  -1  24  124.09    5.98
   2   1  24  119.00    5.54
  -2  -1  25   26.30    2.91
  -2  -1  25   24.67    2.37
   2   1  25   22.89    2.59
  -2  -1  26   21.65    2.41
   2   1  26   21.04    2.22
  -2  -1  26   22.06    1.89
  -2  -1  27    5.83    1.41
   2   1  27    6.04    1.26
  -2  -1  28    1.09    0.83
   2  -2  28   22.76    1.70
  -2   2  27    6.48    1.20
   2  -2  27    6.72    1.43
   2  -2  26    0.70    1.33
  -2   2  26    0.11    1.07
   2  -2  25   66.03    3.52
   2  -2  25   73.08    4.35
  -2  -2 -25   67.38    4.15
  -2   2  25   71.36    4.00
   2  -2  24    1.26    1.39
   2  -2  24    1.63    1.93
  -2   2  24   -0.09    1.46
  -2  -2 -24   -1.07    1.85
   2  -2  23   22.67    3.11
  -2  -2 -23   23.04    3.15
   2  -2  23   25.39    2.76
  -2   2  23   22.32    2.78
   2  -2  22   26.30    2.87
  -2  -2 -22   34.97    4.00
  -2   2  22   30.52    3.35
   2  -2  22   32.30    3.54
   2  -2  21   19.32    2.96
  -2  -2 -21   18.71    3.15
  -2   2  21   19.52    2.85
   2  -2  21   18.04    2.54
   2  -2  20    4.30    1.87
  -2   2  20    4.43    1.74
   2  -2  20    4.63    1.76
  -2  -2 -20    3.96    2.22
   2   2 -19   90.51   14.93
  -2   2  19   85.70    5.04
  -2  -2 -19   84.73    5.80
   2  -2  19   83.27    5.13
  -2  -2 -19   72.08   13.56
   2  -2  19   79.86    4.43
  -2  -2 -18   -2.61    4.98
  -2  -2 -18    3.96    2.11
   2  -2  18    5.35    1.67
   2   2 -18    2.98    5.22
  -2   2  18    3.70    1.76
  -2   2  18    3.15    1.24
   2  -2  17  185.23    6.22
  -2  -2 -17  200.80    8.04
  -2  -2 -17  210.95   21.69
  -2   2  17  199.38    7.06
  -2  -2 -16  137.54   17.71
  -2  -2 -15   32.45    9.35
  -2  -2 -14  102.07   14.00
  -2  -2 -13  161.91   16.82
  -2   2  13  144.48   11.37
  -2  -2 -12   51.86    9.78
  -2   2  12   46.62    6.61
  -2  -2 -11  424.78   24.08
  -2   2  11  444.82   18.93
  -2  -2 -10 1077.62   35.82
  -2   2  10 1144.61   29.37
  -2   2   9  334.17   15.45
  -2  -2  -9  317.60   18.54
  -2  -2  -8  228.12   14.65
  -2  -2  -7  261.96   14.65
  -2  -2  -6  950.96   25.24
  -2  -2  -5  332.60   13.91
  -2  -2  -5  335.36   12.56
  -2  -2  -4  585.71   17.11
  -2  -2  -4  619.49   16.06
  -2  -2  -3 2668.68   32.45
  -2  -2  -3 2643.92   23.26
  -2  -2  -2 1739.67   20.28
  -2  -2  -1  131.07    6.15
  -2  -2   0 1559.24   22.19
   2  -2   0 1639.20   17.71
  -2  -2   1  136.37    7.17
  -2  -2   2 1705.00   26.19
  -2   2  -2 1811.70   18.06
  -2   2  -3 2593.01   26.04
  -2  -2   3 2588.27   33.97
  -2  -2   3 2596.82   29.65
  -2  -2   3 2694.17   33.58
  -2  -2   4  663.05   15.78
  -2  -2   4  656.88   18.00
  -2   2  -4  704.28   17.52
  -2  -2   5  346.60   12.26
  -2  -2   5  353.90   14.02
  -2   2  -6 1202.79   27.73
  -2  -2   6  907.60   23.11
  -2   2  -7  326.10   16.71
  -2  -2   7  266.09   13.37
  -2   2  -8  184.12    8.02
  -2  -2   8  195.34   12.13
  -2   2  -8  207.03   13.80
  -2  -2   9  374.83   16.95
  -2   2  -9  414.94   20.80
  -2  -2  10 1363.12   33.23
  -2   2 -10 1404.15   38.95
  -2  -2  11  480.80   20.50
  -2   2 -11  459.32   23.56
  -2   2 -12   58.36    9.78
  -2  -2  12   57.34    7.52
  -2   2 -13  120.18   13.91
  -2  -2  13  129.02   11.41
   2  -2 -13  142.50   14.93
  -2   2 -14   93.53   12.87
  -2  -2  14  112.79   10.93
   2  -2 -14  102.51   13.22
  -2   2 -15   21.04    7.69
   2  -2 -15   29.95    8.69
  -2   2 -16  154.24   17.63
   2  -2 -16  152.76   17.21
  -2  -2  17  226.23    7.87
  -2  -2  17  209.90    6.87
  -2   2 -17  215.21   21.37
   2  -2 -17  199.71   19.82
  -2  -2  18    2.06    1.41
   2  -2 -18    4.26    1.76
   2   2  18    4.50    1.63
  -2   2 -18    9.76    6.59
   2  -2 -18    6.63    4.67
  -2  -2  18    4.52    1.83
   2   2  19   84.05    4.85
   2  -2 -19   81.99    4.83
  -2  -2  19   86.07    4.83
  -2   2 -19   79.49   13.65
  -2  -2  19   92.42    5.48
   2   2  20    3.04    1.80
   2  -2 -20    4.98    1.83
  -2  -2  20    4.48    2.06
  -2  -2  20    3.48    1.76
   2   2  21   21.41    2.87
  -2  -2  21   18.17    2.83
  -2  -2  21   17.95    2.52
  -2  -2  22   25.41    3.26
  -2  -2  22   21.71    2.85
   2   2  22   27.80    3.11
   2   2  23   20.11    2.61
  -2  -2  23   28.91    3.02
  -2  -2  23   20.04    3.11
  -2  -2  23   23.04    2.85
  -2  -2  24   -0.26    1.48
  -2  -2  24    1.46    1.78
   2   2  24   -1.02    1.39
  -2  -2  25   63.84    3.63
   2   2  25   68.92    3.83
  -2  -2  25   69.62    4.30
   2   2  26    0.96    1.09
  -2  -2  26   -0.07    1.39
  -2  -2  26   -0.22    1.07
  -2  -2  27    5.26    1.35
   2   2  27    6.59    1.13
  -2  -2  27    5.19    0.98
  -2  -2  28   22.19    1.70
   2  -3  28   38.39    2.02
   2  -3  27   24.82    2.13
  -2   3  26   55.38    2.87
   2  -3  26   58.88    3.43
   2  -3  26   62.43    3.06
  -2   3  25    4.11    1.35
   2  -3  25    5.69    1.96
  -2  -3 -25    5.24    1.89
   2  -3  25    5.04    1.59
  -2  -3 -24   22.84    3.02
   2  -3  24   27.45    3.11
  -2   3  24   21.15    2.46
   2  -3  24   26.93    2.70
  -2  -3 -23    3.54    2.15
   2  -3  23    1.61    1.70
   2  -3  23    1.85    1.87
  -2   3  23    1.26    1.39
  -2  -3 -22  156.28    7.72
   2  -3  22  167.71    7.24
   2  -3  22  159.87    6.39
  -2   3  22  150.67    6.37
   2  -3  21  161.89    7.19
  -2  -3 -21  160.89    7.93
   2  -3  21  141.57    6.13
  -2   3  21  151.98    6.54
   2  -3  20   39.62    3.80
   2  -3  20   32.56    3.13
  -2  -3 -20   36.99    4.22
  -2   3  20   35.49    3.50
  -2  -3 -19   27.06    3.67
   2  -3  19   30.21    3.37
  -2   3  19   27.13    3.02
   2  -3  19   26.32    2.89
   2  -3  18   21.54    2.54
  -2  -3 -18   23.65    3.39
  -2  -3 -18   18.50    7.98
  -2   3  18   19.00    2.52
  -2  -3 -17   48.75   10.85
  -2   3  17   36.47    3.17
  -2  -3 -17   40.28    3.91
   2  -3  17   39.95    3.17
  -2  -3 -16   16.41    6.98
  -2  -3 -15   12.98    7.09
  -2  -3 -14  228.79   20.50
  -2  -3 -14  153.48   14.93
  -2  -3 -13  550.44   30.02
  -2   3  13  549.13   22.28
  -2  -3 -12   34.52    8.65
  -2   3  12   31.76    5.63
  -2   3  11  117.24   10.45
  -2  -3 -11  100.38   12.24
  -2  -3 -10  128.15   13.19
  -2  -3  -9  475.58   22.69
  -2  -3  -8  237.79   15.04
  -2  -3  -7  225.57   13.80
  -2  -3  -6  426.59   17.52
  -2  -3  -6  378.49   16.26
  -2  -3  -5 2612.47   40.10
  -2  -3  -5 2574.89   39.82
   2  -3   4 1216.38    9.74
  -2  -3  -4 1604.58   30.04
  -2  -3  -3 2760.49   30.10
   2  -3   3 2593.67   19.63
  -2  -3  -2  558.67   13.98
  -2  -3  -1  396.85   12.43
   2  -3   1  383.88   11.80
   2  -3   0 3325.60   31.95
  -2  -3   0 3238.48   36.89
  -2  -3   1  396.87   13.50
   2  -3  -2  609.78    8.87
  -2  -3   2  599.86   17.15
  -2  -3   2  584.95   16.56
  -2   3  -2  597.82    9.39
  -2  -3   3 2658.81   35.21
  -2  -3   3 2732.23   38.12
  -2  -3   3 2744.42   36.26
  -2   3  -3 2664.89   25.41
  -2  -3   4 1684.91   31.43
  -2  -3   4 1662.16   28.63
  -2  -3   4 1691.00   29.73
  -2   3  -5 2510.59   33.39
  -2  -3   5 2628.44   38.30
  -2  -3   6  428.56   16.37
  -2  -3   6  447.54   17.35
  -2  -3   7  283.50   14.50
  -2  -3   7  272.24   13.78
  -2   3  -8  392.81   17.87
  -2  -3   8  213.14   13.22
  -2   3  -9  898.30   30.10
  -2   3  -9  829.48   18.71
   2  -3 -10  143.04   12.78
  -2  -3  10  142.87   11.65
  -2  -3  11  148.28   11.95
   2  -3 -11  164.24   14.13
  -2   3 -11  156.04   14.08
   2  -3 -12   50.54    9.09
  -2  -3  12   38.32    6.41
  -2   3 -12   42.88    9.82
   2  -3 -13  543.70   27.67
  -2   3 -13  490.60   26.65
  -2  -3  13  523.83   23.28
  -2   3 -14  219.16   18.84
  -2  -3  14  223.68   15.78
   2  -3 -14  238.20   19.19
   2  -3 -15   14.74    5.50
  -2   3 -15   14.02    6.80
  -2   3 -16   25.63    8.06
   2  -3 -16   21.65    6.87
  -2  -3  17   48.41    3.48
  -2  -3  17   46.15    3.80
   2  -3 -17   46.82    9.69
   2  -3 -17   44.19    3.67
  -2  -3  17   62.69    9.80
   2   3  17   43.60    3.22
  -2   3 -17   56.08   11.39
   2  -3 -18   20.32    2.65
  -2  -3  18   19.76    2.56
   2  -3 -18   15.39    6.35
  -2  -3  18   23.13    2.93
   2   3  18   25.50    2.74
   2   3  19   22.11    2.63
   2  -3 -19   24.78    3.13
  -2  -3  19   24.26    2.91
  -2  -3  19   26.80    3.24
  -2  -3  20   39.04    3.78
   2   3  20   40.47    3.48
   2  -3 -20   40.25    3.70
  -2  -3  20   36.26    3.43
  -2  -3  21  154.95    7.13
   2   3  21  156.24    6.46
  -2  -3  21  148.02    6.37
   2   3  22  159.50    6.35
  -2  -3  22  165.67    7.17
  -2  -3  22  164.11    6.61
  -2  -3  23    2.48    1.76
   2   3  23    3.72    1.54
  -2  -3  23    2.74    2.06
  -2  -3  24   21.24    2.63
  -2  -3  24   20.32    2.80
   2   3  24   18.76    2.22
   2   3  25    4.43    1.30
  -2  -3  25    3.28    1.70
  -2  -3  25    4.00    1.56
  -2  -3  26   60.58    3.50
   2   3  26   54.45    2.70
  -2  -3  26   66.40    3.28
  -2  -3  27   18.78    1.54
  -2  -3  27   22.71    2.02
  -2  -3  28   17.39    1.26
  -2  -3  28   39.60    2.00
   2  -4  27    1.30    0.96
   2  -4  26   47.86    2.50
   2  -4  26   56.69    3.26
   2  -4  26   54.62    2.87
   2  -4  25   17.78    2.30
   2  -4  25   17.17    2.11
   2  -4  24  142.56    5.52
  -2   4  24  135.61    4.98
  -2  -4 -24  147.83    6.69
   2  -4  24  143.24    5.98
  -2  -4 -23    3.09    2.28
   2  -4  23    0.41    1.87
  -2   4  23    1.70    1.39
   2  -4  23    1.39    1.63
   2  -4  22    5.19    1.93
   2  -4  22    3.46    1.93
  -2   4  22    7.02    1.78
  -2  -4 -22    6.52    2.67
   2  -4  21   23.11    3.13
  -2  -4 -21   26.04    3.76
  -2   4  21   29.41    2.96
   2  -4  21   23.50    2.89
   2  -4  20   14.69    2.46
  -2  -4 -20    8.43    2.72
  -2   4  20   10.76    2.17
   2  -4  20    8.04    2.22
   2  -4  19    1.33    1.70
   2  -4  19    1.70    1.63
  -2   4  19    1.56    1.33
  -2  -4 -19    0.65    2.33
   2  -4  18   89.75    4.78
  -2  -4 -18   91.25    6.00
  -2  -4 -18  105.85   15.69
  -2   4  18   92.62    4.89
   2   4 -18  107.98   16.04
  -2  -4 -17   65.21   12.28
  -2  -4 -17   72.14    5.28
   2  -4  17   73.16    4.17
  -2  -4 -16   49.77    4.28
  -2  -4 -16   40.86   10.37
   2  -4  16   46.62    3.28
  -2  -4 -15  160.56   17.82
  -2  -4 -14   18.95    7.09
  -2  -4 -14   16.54    5.56
  -2  -4 -13  140.61   13.95
  -2   4  13  148.09   12.22
  -2  -4 -13  134.52   15.19
  -2   4  12    4.72    3.33
  -2  -4 -12    1.98    4.06
  -2  -4 -12    3.20    3.30
  -2  -4 -11  366.97   22.69
  -2  -4 -11  358.23   20.54
  -2  -4 -10  274.13   18.56
  -2  -4  -9  317.23   18.89
  -2  -4  -9  283.74   17.39
  -2  -4  -8  859.80   28.78
  -2  -4  -8  653.25   27.34
  -2  -4  -7  219.68   13.98
  -2  -4  -7  189.78   13.89
  -2  -4  -6  146.06   11.13
  -2  -4  -5 2583.17   44.75
   2  -4   5 2032.97   17.00
   2  -4   4  615.23   11.32
  -2  -4  -4  604.91   20.84
  -2  -4  -3 1132.61   27.19
   2  -4   3 1033.34   16.37
   2  -4   2    2.33    2.30
  -2  -4  -2    2.52    2.48
  -2  -4  -1  247.48   11.41
   2  -4   1  231.46   10.69
  -2  -4   0    5.80    2.98
  -2  -4   0    6.13    2.87
   2  -4   0   10.63    2.96
  -2  -4   1  235.14   11.63
  -2  -4   1  233.83   11.67
  -2  -4   2    1.07    2.50
  -2  -4   2    3.13    3.37
  -2   4  -2    1.11    0.63
  -2   4  -3 1057.40   15.22
  -2  -4   3 1067.05   26.43
   2  -4  -3 1021.78   13.65
  -2  -4   3 1093.05   24.97
  -2  -4   4  564.61   19.00
  -2  -4   4  565.50   20.06
  -2   4  -4  540.74   13.45
  -2  -4   4  585.93   18.58
   2  -4  -4  566.46   12.69
   2  -4  -5 2551.52   31.41
  -2  -4   5 2319.40   38.95
  -2  -4   5 2597.73   43.69
  -2  -4   5 2598.92   41.86
  -2   4  -5 2329.25   32.26
  -2   4  -6  137.91    9.02
   2  -4  -6  129.39    8.46
  -2  -4   6  151.37   11.19
  -2  -4   6  149.50   10.72
  -2  -4   7  220.64   13.72
   2  -4  -7  200.88   11.32
  -2   4  -7  241.05   13.58
  -2  -4   7  222.27   13.45
   2  -4  -8  831.48   24.87
  -2  -4   8  884.60   27.97
  -2  -4   8  873.69   27.91
  -2  -4   9  354.55   18.56
  -2  -4   9  372.05   18.87
   2  -4  -9  354.42   17.58
  -2  -4  10  302.34   17.98
  -2  -4  10  281.52   16.74
   2  -4 -10  266.13   16.39
  -2  -4  11  343.66   20.13
   2  -4 -11  381.27   20.32
  -2  -4  11  379.31   20.21
   2  -4 -12    7.09    4.91
  -2  -4  12    3.17    3.17
  -2   4 -12    4.15    4.46
  -2  -4  12    5.00    3.72
  -2  -4  13  143.39   14.00
   2  -4 -13  145.22   14.52
  -2  -4  13  144.00   12.95
   2  -4 -14   24.06    6.11
  -2  -4  14   23.89    5.61
  -2  -4  14   28.67    6.98
  -2   4 -14   26.28    8.39
  -2  -4  15  182.99   16.71
  -2   4 -15  215.05   21.78
   2  -4 -15  173.45   16.71
   2  -4 -16   63.51   10.69
  -2  -4  16   46.58    3.41
  -2  -4  16   58.56    9.72
  -2   4 -16   66.90   12.32
  -2  -4  16   54.43    3.91
   2  -4 -17   56.06   10.80
  -2  -4  17   69.51   10.80
   2  -4 -17   62.84    4.50
  -2   4 -17   69.42   12.41
  -2  -4  17   60.86    3.96
  -2  -4  17   64.25    4.39
  -2  -4  18  102.51    5.22
  -2   4 -18  101.92   14.74
  -2  -4  18   93.46    5.39
   2  -4 -18   93.64    5.56
   2  -4 -18  104.88   14.48
  -2  -4  19    5.50    1.96
   2  -4 -19    2.85    1.83
   2  -4 -19    3.72    1.72
  -2  -4  19    6.04    2.02
  -2  -4  20   13.89    2.59
  -2  -4  20   19.26    2.72
  -2  -4  21   24.93    3.00
  -2  -4  21   24.52    3.15
  -2  -4  22    8.15    2.22
  -2  -4  22    6.19    2.06
  -2  -4  23    1.37    1.83
  -2  -4  23    0.67    1.80
  -2  -4  24  127.07    5.61
  -2  -4  24  133.89    5.59
  -2  -4  25   18.30    2.24
  -2  -4  25   20.30    2.46
  -2  -4  26   49.14    2.83
  -2  -4  26   49.21    3.02
  -2  -4  27    0.52    0.74
  -2  -4  27    0.20    0.87
  -2  -4  28   10.45    0.98
   2  -5  27    8.98    1.15
   2  -5  26   54.32    2.76
   2  -5  26   49.10    2.78
   2  -5  25    6.11    1.63
   2  -5  25    6.76    1.61
   2  -5  24   78.99    4.20
  -2  -5 -24   77.51    4.87
   2  -5  24   76.97    4.24
  -2  -5 -23    3.72    2.30
   2  -5  23    3.28    1.78
   2  -5  23    4.85    1.89
  -2  -5 -22  154.52    7.59
   2  -5  22  152.56    6.19
   2  -5  22  151.89    6.52
   2  -5  21   22.61    3.02
   2  -5  21   22.11    2.87
  -2  -5 -21   22.21    3.67
   2  -5  20  105.29    5.74
   2  -5  20  101.38    5.35
  -2  -5 -20  107.87    6.83
   2  -5  19   39.67    3.67
  -2  -5 -19   33.93    4.20
   2  -5  19   37.39    3.43
   2  -5  18   11.15    2.09
  -2  -5 -18    9.87    2.65
   2  -5  18   13.13    2.30
  -2  -5 -17  186.30    8.41
   2  -5  17  157.76    6.13
  -2  -5 -16   18.91    3.11
   2  -5  16   19.15    2.37
  -2  -5 -15   31.10    8.11
  -2  -5 -15    5.80    2.52
  -2  -5 -14   19.45    7.46
  -2  -5 -14    0.74    4.00
  -2  -5 -13   -0.57    4.76
  -2  -5 -13    7.28    4.93
  -2  -5 -12    3.43    3.89
  -2  -5 -12    0.89    3.13
  -2  -5 -11  122.11   13.30
  -2  -5 -11  148.91   14.65
  -2  -5 -10  213.84   17.54
  -2  -5  -9  156.91   14.19
  -2  -5  -8   22.97    6.78
  -2  -5  -7  371.70   21.11
  -2  -5  -6  345.62   18.52
   2  -5   5  523.92   20.82
   2  -5   5  553.07   12.11
  -2  -5  -5  539.92   22.39
  -2  -5  -4   84.03    9.26
   2  -5   4   87.10    5.43
   2  -5   4   90.68    8.69
   2  -5   3  126.78    9.69
   2  -5   3  132.74    7.13
  -2  -5  -3  142.20   11.00
   2  -5   2   48.54    6.00
   2  -5   2   38.23    4.33
  -2  -5  -2   42.32    6.48
  -2  -5  -1 1024.75   25.76
  -2  -5  -1 1017.41   27.13
   2  -5   1 1053.79   25.00
  -2  -5   0 1385.74   31.00
  -2  -5   0 1380.33   29.82
  -2  -5   1 1028.32   26.45
  -2  -5   1 1061.36   26.74
  -2  -5   2   51.12    6.43
  -2  -5   2   44.78    6.59
  -2  -5   3  109.79    8.96
  -2   5  -3  111.77    4.63
  -2  -5   3  113.31    9.72
  -2  -5   4   66.62    7.91
  -2   5  -4   62.77    4.54
  -2  -5   4   64.47    6.96
  -2  -5   5  522.20   21.39
  -2  -5   5  512.59   20.65
   2  -5  -5  502.62   13.32
  -2  -5   5  536.50   19.50
  -2   5  -5  471.75   14.19
   2  -5  -6  438.48   14.50
  -2  -5   6  406.96   19.21
  -2  -5   6  418.59   19.74
  -2   5  -6  373.66   14.22
  -2  -5   7  433.30   20.56
  -2  -5   7  421.96   20.08
   2  -5  -7  462.95   16.61
  -2   5  -7  413.44   16.52
  -2  -5   8   18.19    5.59
  -2  -5   8   16.54    5.35
  -2   5  -8   22.84    5.72
   2  -5  -8   23.08    4.28
  -2  -5   9  197.10   14.61
  -2  -5   9  193.21   15.00
   2  -5  -9  194.12   12.82
  -2   5  -9  204.53   14.00
  -2  -5  10  269.63   17.43
  -2  -5  10  274.20   18.32
   2  -5 -10  268.20   16.02
  -2  -5  11  137.61   13.58
  -2  -5  11  128.65   12.26
   2  -5 -11  128.57   12.00
   2  -5 -12    6.19    4.00
  -2   5 -12    7.69    5.00
  -2  -5  12    6.63    4.43
  -2  -5  12    4.13    3.80
  -2   5 -13    0.63    3.63
   2  -5 -13    4.76    4.00
  -2  -5  13    6.89    3.87
  -2  -5  13    5.11    3.83
  -2   5 -14   11.93    6.33
   2  -5 -14   24.39    6.93
  -2  -5  14   18.30    6.26
  -2  -5  14    4.02    2.28
  -2  -5  15   33.43    7.59
  -2   5 -15   29.37    9.06
   2  -5 -15   46.88    9.13
  -2  -5  16   14.98    2.41
   2  -5 -16   26.17    7.13
  -2   5 -16   32.19    8.85
   2  -5 -16   14.06    2.39
  -2  -5  16   18.26    2.35
  -2  -5  16   13.91    5.72
   2  -5 -17  171.65    7.50
  -2  -5  17  155.32   16.15
  -2  -5  17  185.93    7.19
  -2   5 -17  151.35   17.08
  -2  -5  17  162.50    6.46
   2  -5 -17  142.78   15.80
   2  -5 -18    5.54    2.22
  -2  -5  18   13.37    2.52
   2  -5 -18   15.76    2.93
  -2  -5  18   10.72    2.20
   2  -5 -19   31.84    3.37
  -2  -5  19   39.04    3.70
  -2  -5  19   37.19    3.50
  -2  -5  20  110.00    5.83
  -2  -5  20  106.57    5.52
   2  -5 -20   92.59    4.98
  -2  -5  21   22.76    3.00
  -2  -5  21   19.45    2.80
  -2  -5  22  143.09    6.35
  -2  -5  22  137.91    5.98
  -2  -5  23    5.00    1.91
  -2  -5  23    6.11    2.09
  -2  -5  24   76.10    4.20
  -2  -5  24   84.66    4.50
  -2  -5  25    4.80    1.56
  -2  -5  25    6.43    1.65
  -2  -5  26   57.88    2.96
  -2  -5  26   56.12    2.91
  -2  -5  27    9.39    1.20
  -2  -5  27   10.95    1.20
  -2  -5  27    8.37    1.04
   2  -6  26   25.67    1.91
   2  -6  26   23.52    1.74
   2  -6  25    0.61    1.11
   2  -6  25   -0.02    1.15
   2  -6  24   11.76    1.87
   2  -6  24   14.11    2.06
   2  -6  23   17.58    2.48
  -2  -6 -23   13.95    2.87
   2  -6  23   11.39    2.04
  -2  -6 -22   12.61    2.93
   2  -6  22   14.85    2.46
   2  -6  22   16.24    2.50
  -2  -6 -21   36.04    4.28
   2  -6  21   30.60    3.17
   2  -6  21   30.00    3.15
   2  -6  20  116.18    5.78
   2  -6  20  112.37    5.54
  -2  -6 -20  118.66    7.09
   2  -6  19   37.99    3.54
   2  -6  19   41.38    3.59
  -2  -6 -19   39.06    4.43
  -2  -6 -18   15.13    3.20
   2  -6  18    9.13    2.11
   2  -6  18   11.39    2.30
   2  -6  17   39.62   10.85
   2  -6  17   56.43    3.98
   2  -6  17   49.25    3.74
  -2  -6 -17   53.45    4.85
  -2  -6 -16   29.63    3.74
   2  -6  16   36.65   10.32
   2  -6  16   29.15    2.96
  -2  -6 -15    7.19    2.30
   2  -6  15    7.04    1.72
  -2  -6 -15    6.85    4.43
   2  -6  15    9.24    6.41
  -2  -6 -14   14.15    5.61
  -2  -6 -13   28.32    7.30
  -2  -6 -12    0.13    3.54
  -2  -6 -11   20.93    6.39
  -2  -6 -10  119.26   13.98
  -2  -6  -9   95.70   12.02
   2  -6   9   98.85   11.78
   2  -6   8  266.29   18.15
  -2  -6  -8  241.57   18.52
   2  -6   7  329.80   19.50
  -2  -6  -7  310.80   20.32
   2  -6   6  413.48   20.84
  -2  -6  -6  411.00   22.30
   2  -6   5  123.65   11.30
  -2  -6  -5  123.89   12.00
  -2  -6  -4  143.15   12.35
   2  -6   4  136.74   11.35
   2  -6   4  147.06    8.11
   2  -6   3  354.10   13.19
   2  -6   3  355.51   17.19
  -2  -6  -3  336.06   18.48
  -2  -6  -2   66.51    8.19
   2  -6   2   72.90    8.00
   2  -6   2   83.64    6.96
  -2  -6  -1  156.08   12.00
   2  -6   1  156.48    9.82
  -2  -6   0    2.48    3.85
  -2  -6   0    2.24    3.26
  -2  -6   1  142.26   11.17
  -2  -6   1  148.87   11.17
  -2  -6   2   71.42    8.56
  -2  -6   2   68.23    8.11
  -2  -6   3  331.45   17.41
  -2  -6   3  353.86   16.78
  -2  -6   4  139.09   10.80
  -2  -6   4  140.57   11.82
  -2  -6   5  118.96   11.11
  -2  -6   5  123.98   10.63
  -2  -6   6  453.21   21.95
  -2  -6   6  444.95   20.17
  -2  -6   6  444.71   21.61
  -2   6  -7  368.05   15.04
  -2  -6   7  344.32   19.52
  -2  -6   7  366.94   20.58
  -2  -6   8  240.57   17.54
  -2  -6   8  235.70   16.52
  -2   6  -8  233.40   13.30
   2  -6  -9   85.86    8.39
  -2   6  -9   80.60    8.65
  -2  -6   9   72.23    9.65
  -2  -6   9   81.51   10.78
   2  -6 -10  142.33   11.48
  -2  -6  10  138.61   14.15
  -2   6 -10  127.26   11.41
  -2  -6  10  138.33   13.13
  -2   6 -11   30.47    6.22
  -2  -6  11   26.21    6.56
  -2  -6  11   25.39    6.93
  -2   6 -12    7.54    4.24
  -2  -6  12   15.95    5.26
  -2  -6  12   15.65    5.48
  -2  -6  13   36.65    7.15
  -2  -6  13   30.17    7.56
  -2  -6  14   16.11    6.00
  -2  -6  14   17.65    5.19
   2  -6 -15    9.30    2.15
  -2  -6  15    6.65    1.61
  -2  -6  15    6.78    1.67
  -2  -6  15    4.98    2.98
   2  -6 -16   24.82    3.24
  -2  -6  16   22.19    7.06
  -2  -6  16   26.78    2.91
  -2  -6  16   23.65    2.65
  -2  -6  17   55.01    4.02
   2  -6 -17   46.32    4.06
  -2  -6  17   49.17    3.72
  -2  -6  18    6.13    1.98
  -2  -6  18    6.48    2.00
   2  -6 -18    9.11    2.20
  -2  -6  19   39.21    3.61
   2  -6 -19   39.02    3.61
  -2  -6  19   36.93    3.59
   2  -6 -20  110.87    5.39
  -2  -6  20  111.50    5.56
  -2  -6  20  116.63    5.83
   2  -6 -21   24.34    2.74
  -2  -6  21   26.34    3.04
  -2  -6  21   23.43    2.91
  -2  -6  22   15.11    2.50
  -2  -6  22   13.74    2.33
  -2  -6  23   11.89    2.11
  -2  -6  23   16.69    2.46
  -2  -6  24   16.80    2.28
  -2  -6  24   15.30    2.04
  -2  -6  25    1.13    1.02
  -2  -6  25    2.41    1.39
  -2  -6  26   27.52    2.02
  -2  -6  26   24.60    1.76
  -2  -6  26   23.00    1.83
  -2  -6  27    0.57    0.59
   2  -7  26    2.89    0.63
   2  -7  26    4.93    0.89
   2  -7  25   22.76    1.76
   2  -7  25   29.08    2.17
   2  -7  24    3.26    1.20
   2  -7  24    6.80    1.61
   2  -7  23   39.36    3.04
   2  -7  23   34.54    2.72
   2  -7  22   39.06    3.09
   2  -7  22   42.60    3.43
  -2  -7 -22   38.78    4.04
   2  -7  21    1.09    1.39
   2  -7  21    1.85    1.83
  -2  -7 -21    1.93    2.50
   2  -7  20    1.11    1.72
   2  -7  20    1.11    1.43
  -2  -7 -20    0.96    2.35
   2  -7  19   17.56    2.54
  -2  -7 -19   17.45    3.48
   2  -7  19   24.91    3.00
   2  -7  18   52.25    3.93
  -2  -7 -18   65.71    5.43
   2  -7  18   58.53    4.06
   2  -7  17   14.87    2.30
   2  -7  17   16.65    2.46
  -2  -7 -17   16.21    2.37
  -2  -7 -17   13.61    2.93
  -2  -7 -16   70.99    4.43
   2  -7  16   70.14    4.30
  -2  -7 -16   67.71    5.28
   2  -7  16   74.18    4.50
  -2  -7 -15   11.19    2.65
   2  -7  15    6.83    5.30
  -2  -7 -15   11.43    6.26
  -2  -7 -15    9.28    2.09
   2  -7  15    8.56    2.00
   2  -7  14   13.17    2.26
  -2  -7 -14   14.93    2.35
  -2  -7 -14   11.91    2.76
   2  -7  14    9.85    2.52
  -2  -7 -14    6.96    4.04
   2  -7  14   19.13    6.89
  -2  -7 -13  107.42   14.54
   2  -7  13   90.12   13.41
   2  -7  12   12.30    5.80
  -2  -7 -12    4.87    5.50
  -2  -7 -11   72.71   11.76
   2  -7  11   64.23   10.98
   2  -7  10   84.44   11.95
  -2  -7 -10   74.03   11.56
   2  -7   9  282.61   20.54
  -2  -7  -9  245.42   20.48
  -2  -7  -8   16.26    5.83
   2  -7   8   16.82    5.69
   2  -7   7  100.70   11.67
  -2  -7  -7   94.49   12.15
   2  -7   6  278.76   18.34
  -2  -7  -6  312.71   20.76
  -2  -7  -5  109.37   12.11
   2  -7   5   96.22   10.78
  -2  -7  -4   66.66    9.74
   2  -7   4   74.25    6.43
   2  -7   4   58.19    8.15
  -2  -7  -3   87.10   10.30
   2  -7   3   87.77    9.56
   2  -7   3   91.38    7.59
  -2  -7  -2  125.63   12.04
   2  -7   2  125.92    9.46
   2  -7   1   92.18    8.80
  -2  -7  -1  107.87   10.98
  -2  -7   0   53.69    7.87
   2  -7   0   44.43    6.37
  -2  -7   1  112.55   10.72
  -2  -7   1  113.37   11.37
  -2  -7   2  122.42   11.91
  -2  -7   2  113.31   10.72
  -2  -7   3   96.09    9.63
  -2  -7   3   99.90   11.17
  -2  -7   4   66.10    9.19
  -2  -7   4   65.01    8.46
  -2  -7   5  105.27   10.22
  -2  -7   5   88.03   10.30
  -2  -7   6  248.77   15.91
  -2  -7   6  252.40   17.43
  -2  -7   7   90.49   10.82
  -2  -7   8   26.56    6.87
  -2  -7   8   18.24    5.72
  -2  -7   9  277.44   19.24
  -2  -7   9  314.99   21.63
  -2  -7  10   83.23   11.54
  -2  -7  10   68.08    9.91
  -2  -7  11   56.90    9.91
  -2  -7  11   53.95    9.37
  -2  -7  12    7.48    4.52
  -2  -7  12    9.30    4.35
  -2  -7  13  102.48   13.39
  -2  -7  13   72.29   10.26
  -2  -7  14   18.45    6.56
   2  -7 -14    8.32    2.43
  -2  -7  14   10.11    1.72
  -2  -7  14   17.61    5.43
  -2  -7  15    3.65    4.04
  -2  -7  15   12.00    2.13
  -2  -7  15    9.19    1.89
   2  -7 -15    9.65    2.33
  -2  -7  16   81.62   12.87
  -2  -7  16   74.88    4.35
   2  -7 -16   73.08    4.91
  -2  -7  16   65.19    4.20
   2  -7 -17   18.04    2.83
  -2  -7  17   16.85    2.43
  -2  -7  17   18.56    2.52
   2  -7 -18   47.93    4.00
  -2  -7  18   43.32    3.63
  -2  -7  18   49.10    3.78
   2  -7 -19   17.30    2.67
  -2  -7  19   21.47    2.78
  -2  -7  19   14.95    2.33
   2  -7 -20    1.22    1.63
  -2  -7  20    1.72    1.54
  -2  -7  20    2.46    1.76
  -2  -7  21    1.74    1.48
   2  -7 -21    1.11    1.41
  -2  -7  21    1.17    1.80
   2  -7 -22   34.41    2.74
  -2  -7  22   33.26    2.85
  -2  -7  22   38.06    3.20
  -2  -7  23   45.93    3.22
  -2  -7  23   46.36    3.02
  -2  -7  24    5.04    1.61
  -2  -7  24    4.09    1.24
  -2  -7  25   23.50    1.98
  -2  -7  25   18.37    1.52
  -2  -7  25   21.13    2.00
  -2  -7  26    6.69    1.09
  -2  -7  26    6.17    1.00
  -2   8  25   20.24    1.56
   2  -8  25   20.21    1.63
   2  -8  24    0.22    0.35
   2  -8  24   25.80    2.13
   2  -8  23    6.11    1.63
   2  -8  23    6.91    1.28
   2  -8  22    0.07    1.09
   2  -8  22    1.61    1.63
   2  -8  21   22.97    2.65
   2  -8  21   20.67    2.30
  -2  -8 -20   14.48    3.24
   2  -8  20   16.98    2.56
   2  -8  20   13.54    2.04
   2  -8  19   79.64    4.65
  -2  -8 -19   83.57    4.50
  -2  -8 -19   88.20    6.06
   2  -8  19   90.73    4.65
  -2  -8 -18    4.59    2.56
   2  -8  18    6.09    1.85
  -2  -8 -18    6.87    1.96
   2  -8  18    3.80    1.54
   2  -8  17   78.86    4.65
   2  -8  17   72.64    4.22
  -2  -8 -17   79.81    4.85
  -2  -8 -17   74.29    5.63
  -2  -8 -16  176.15    8.26
   2  -8  16  186.15    6.63
   2  -8  16  169.65    6.65
  -2  -8 -16  171.50    7.15
  -2  -8 -15  156.00    7.65
   2  -8  15  159.34   18.15
   2  -8  15  149.30    6.65
  -2  -8 -15  153.06    6.78
   2  -8  14  226.62    8.61
   2  -8  14  245.31   22.50
  -2  -8 -14  234.86    8.28
  -2  -8 -14  231.44    8.89
  -2  -8 -13   17.89    7.76
   2  -8  13   12.32    2.48
  -2  -8 -13   15.50    2.59
   2  -8  13   11.35    1.93
   2  -8  13   19.34    7.22
  -2  -8 -13   12.93    2.72
   2  -8  12  111.35   14.87
  -2  -8 -12  107.44   15.11
   2  -8  12  106.61    5.50
   2  -8  11   92.42   13.17
  -2  -8 -11   92.59   14.58
  -2  -8 -10  108.46   15.32
   2  -8  10  117.00   14.43
   2  -8   9    4.61    4.13
  -2  -8  -9    4.26    3.87
  -2  -8  -8  180.54   18.11
   2  -8   8  176.28   16.54
  -2  -8  -7   13.95    5.85
   2  -8   7   17.26    5.83
   2  -8   6  136.15   13.82
  -2  -8  -6  139.74   15.24
   2  -8   5  242.90   17.89
  -2  -8  -5  249.87   19.54
  -2  -8  -4  325.93   21.74
  -2  -8  -3  360.16   22.13
   2  -8   3  379.53   16.71
   2  -8   2   25.10    4.89
  -2  -8  -2   24.71    6.22
  -2  -8  -1  338.06   20.17
   2  -8   1  351.16   17.58
   2  -8   0   16.24    4.56
  -2  -8   0   14.98    4.78
   2  -8  -1  347.88   18.95
  -2  -8   1  305.80   18.61
  -2  -8   2   25.30    6.02
   2  -8  -2   23.50    5.69
  -2  -8   3  381.92   22.34
  -2  -8   3  353.79   19.67
  -2  -8   4  343.79   21.52
  -2  -8   4  333.08   18.93
  -2  -8   5  219.12   17.50
  -2  -8   5  234.53   15.80
  -2  -8   6  151.41   15.02
  -2  -8   6  167.91   13.67
  -2  -8   7   13.98    5.15
  -2  -8   8  198.06   17.15
  -2  -8   9   15.08    5.22
  -2  -8  10  116.40   13.58
  -2  -8  11   80.03   11.35
  -2  -8  12  102.48   13.04
  -2  -8  12   96.09    5.17
   2  -8 -12  105.74    5.61
   2  -8 -13   10.45    2.26
  -2  -8  13    9.30    1.76
  -2  -8  13    6.28    2.04
   2  -8 -14  261.98    8.96
  -2  -8  14  231.16   19.34
  -2  -8  14  242.70    7.39
   2  -8 -15  140.37    6.87
  -2  -8  15  139.15    5.80
   2  -8 -16  170.52    7.35
  -2  -8  16  153.00    6.15
   2  -8 -17   78.66    5.17
  -2  -8  17   73.12    4.43
   2  -8 -18    8.39    2.33
  -2  -8  18    6.04    1.74
   2  -8 -19   81.38    4.91
  -2  -8  19   90.05    4.56
  -2  -8  19   75.44    4.50
  -2  -8  20   16.32    2.13
  -2  -8  20   14.72    2.35
   2  -8 -20   16.11    2.48
  -2  -8  21   23.76    2.65
   2  -8 -21   23.19    2.52
  -2  -8  21   22.63    2.28
  -2  -8  22    0.20    1.41
  -2  -8  22    1.48    1.15
   2  -8 -22    0.54    1.28
  -2  -8  23    0.13    0.50
  -2  -8  23    3.35    1.35
   2  -8 -23    2.11    0.74
  -2  -8  24   26.17    2.24
  -2  -8  24   24.08    2.02
  -2  -8  25   22.95    1.74
  -2  -8  25   21.71    1.61
  -2   9  24    4.48    1.07
   2  -9  24    3.50    1.00
   2  -9  23   -0.09    0.30
   2  -9  23    4.33    1.26
   2  -9  22   21.50    2.20
   2  -9  21   19.93    2.35
   2  -9  20   21.47    2.59
   2  -9  19   85.51    4.61
  -2  -9 -19   80.27    4.41
   2  -9  18   32.06    3.09
  -2  -9 -18   30.45    3.91
  -2  -9 -18   28.84    3.06
  -2  -9 -17   81.92    5.04
  -2  -9 -17   79.94    5.65
   2  -9  17   89.59    5.00
  -2  -9 -16   54.43    4.37
  -2  -9 -16   48.95    4.63
   2  -9  16   56.49    4.11
  -2  -9 -15   28.52    3.37
   2  -9  15   23.34    2.70
  -2  -9 -15   29.97    3.85
  -2  -9 -14   17.37    2.98
   2  -9  14   20.63    3.20
  -2  -9 -14   15.87    2.96
   2  -9  14   20.74    2.67
  -2  -9 -13   51.36    4.26
  -2  -9 -13   50.27    4.39
   2  -9  13   48.69    4.17
   2  -9  13   46.30    3.30
   2  -9  13   36.91    9.02
  -2  -9 -13   49.62   10.93
  -2  -9 -12  118.11    6.11
  -2  -9 -12  104.20    5.93
   2  -9  12   92.92    4.46
   2  -9  12  107.16    5.85
   2  -9  12   89.86   13.56
  -2  -9 -12  113.24   16.41
   2  -9  11   61.16   11.00
  -2  -9 -11   46.45   10.74
  -2  -9 -11   49.91    4.13
  -2  -9 -11   51.84    4.02
   2  -9  11   48.84    3.17
   2  -9  11   45.65    3.80
   2  -9  10    9.85    4.83
  -2  -9 -10   17.93    6.98
  -2  -9  -9   41.02   10.11
   2  -9   9   38.97    8.46
  -2  -9  -8   89.94   13.63
   2  -9   8  105.92   13.69
  -2  -9  -7  122.85   15.28
   2  -9   7  122.72   14.28
  -2  -9  -6  185.84   18.54
  -2  -9  -5   81.92   12.39
  -2  -9  -4  264.87   20.71
  -2  -9  -3  308.97   21.82
   2  -9   2  102.79    9.80
  -2  -9  -2  102.96   12.48
  -2  -9  -1   71.49   10.48
   2  -9   1   91.14    9.76
   2  -9   0  230.42   16.11
  -2  -9   0  245.07   18.17
  -2  -9   1   74.66   10.37
   2  -9  -1   73.79    9.72
  -2  -9   2   93.53   11.00
   2  -9  -2  106.35   11.87
   2  -9  -3  298.63   20.24
  -2  -9   3  291.93   18.84
  -2  -9   4  241.98   17.08
   2  -9  -4  257.05   19.65
  -2  -9   5   70.21    9.26
   2  -9  -5   84.47   11.63
  -2  -9   6  154.19   13.65
  -2  -9   7  117.05   13.87
  -2  -9   8   91.18   12.59
  -2  -9   9   42.69    8.89
  -2  -9  10   14.43    6.11
   2  -9 -10   11.59    2.28
  -2  -9  11   61.88    4.37
  -2  -9  11   57.86    3.74
   2  -9 -11   61.06    4.43
  -2  -9  11   62.03   11.24
  -2  -9  12  112.83    5.04
   2  -9 -12  107.92    5.98
  -2  -9  12  114.09    5.89
  -2  -9  13   34.58    2.89
   2  -9 -13   34.76    3.67
  -2  -9  13   36.73    3.78
  -2  -9  13   38.60    3.04
   2  -9 -14   10.30    2.56
  -2  -9  14   14.56    2.13
  -2  -9  15   30.28    2.93
   2  -9 -15   35.26    3.83
  -2  -9  16   49.14    3.56
   2  -9 -16   52.54    4.43
   2  -9 -17   77.16    5.28
  -2  -9  17   73.16    4.28
   2  -9 -18   33.63    3.61
  -2  -9  18   35.89    3.15
   2  -9 -19   81.81    4.96
  -2  -9  19   80.03    4.30
   2  -9 -20   25.21    2.83
  -2  -9  20   22.84    2.63
  -2  -9  20   23.54    2.48
   2  -9 -21   24.84    2.54
  -2  -9  21   20.45    2.26
  -2  -9  21   21.04    2.43
  -2  -9  22   20.50    2.11
   2  -9 -22   19.74    2.06
   2  -9 -23    0.70    0.50
  -2  -9  23    3.37    1.33
  -2  -9  23    3.74    1.11
  -2  -9  24    3.39    0.85
  -2  -9  24    0.78    0.91
  -2  -9  25    4.33    0.78
  -2  10  24   21.13    1.43
   2 -10  23    4.24    1.04
  -2  10  23    4.61    1.13
   2 -10  22   18.91    1.87
   2 -10  21   -0.83    1.22
  -2 -10 -20   40.75    2.74
   2 -10  20   37.84    2.89
  -2 -10 -19   18.13    2.30
   2 -10  19   15.91    2.15
   2 -10  18   47.30    3.46
  -2 -10 -18   43.69    3.56
  -2 -10 -17    6.72    2.11
   2 -10  17    4.35    1.70
  -2 -10 -16   22.47    3.04
   2 -10  16   18.67    2.46
  -2 -10 -15    5.93    2.20
   2 -10  15    7.43    1.87
   2 -10  14    3.00    1.61
   2 -10  14    1.96    1.85
  -2 -10 -14    0.80    1.83
  -2 -10 -13   68.88    5.09
   2 -10  13   68.19    3.98
   2 -10  13   73.71    5.17
  -2 -10 -12  301.00    9.74
   2 -10  12  271.57    9.39
   2 -10  12  271.26    7.50
  -2 -10 -12  282.72    9.63
   2 -10  11   78.10    4.02
  -2 -10 -11   90.18   14.72
   2 -10  11   92.51    5.48
  -2 -10 -11   84.66    5.50
  -2 -10 -10  245.53   23.80
  -2 -10 -10  241.72    8.85
   2 -10  10  260.81    8.78
   2 -10  10  241.77    6.65
  -2 -10  -9   69.92    4.80
  -2 -10  -9   63.45   12.48
   2 -10   9   77.49    4.80
  -2 -10  -8   75.29    4.91
   2 -10   8   76.29    4.46
   2 -10   8   84.79    4.87
  -2 -10  -7   61.71   11.82
  -2 -10  -6    3.65    4.87
  -2 -10  -5    8.74    5.04
  -2 -10  -4  472.69   28.95
  -2 -10  -3  282.24   22.04
  -2 -10  -2  547.29   29.82
  -2 -10  -1   19.84    6.76
   2 -10   1   20.67    5.19
  -2 -10   0   72.51   10.76
   2 -10   0   82.79   10.43
  -2 -10   1   16.69    5.35
   2 -10  -1   14.95    4.78
  -2 -10   2  536.61   27.26
   2 -10  -2  598.13   29.21
   2 -10  -3  268.31   20.45
  -2 -10   3  255.09   18.58
  -2 -10   4  427.09   23.76
   2 -10  -4  470.86   27.71
  -2 -10   5    8.67    3.96
   2 -10  -5    6.65    4.15
   2 -10  -6    1.96    3.96
   2 -10  -7   62.38   11.41
   2 -10  -8   61.56    4.35
  -2 -10   8   61.82    4.04
   2 -10  -8   69.21   12.43
  -2 -10   8   67.51    4.22
  -2 -10   9   59.30    4.11
   2 -10  -9   62.03    4.37
  -2 -10   9   60.73    4.22
   2 -10  -9   55.73   10.91
  -2 -10  10  243.35    7.13
  -2 -10  10  247.72    8.26
  -2 -10  10  242.83    7.91
   2 -10 -10  223.05   22.30
   2 -10 -10  230.20    8.43
   2 -10 -11   80.57   14.04
   2 -10 -11   87.83    5.41
  -2 -10  11  100.11    5.56
  -2 -10  11   85.38    4.78
  -2 -10  11   84.07    4.48
   2 -10 -12  284.15    9.69
  -2 -10  12  275.81    8.09
  -2 -10  12  288.89    9.43
  -2 -10  12  275.76    8.32
   2 -10 -13   58.88    4.76
  -2 -10  13   63.49    4.80
  -2 -10  13   61.40    3.98
  -2 -10  13   59.25    3.98
  -2 -10  14    3.56    1.43
  -2 -10  14    2.50    1.39
  -2 -10  14    0.07    1.48
   2 -10 -14    3.87    2.15
   2 -10 -15    3.80    2.28
  -2 -10  15    2.37    1.46
  -2 -10  15    5.76    1.63
  -2 -10  16   17.52    2.46
  -2 -10  16   19.37    2.39
   2 -10 -16   16.52    3.04
   2 -10 -17    1.67    1.93
  -2 -10  17    1.96    1.41
  -2 -10  17    0.33    1.37
   2 -10 -18   44.19    3.93
  -2 -10  18   35.69    3.11
  -2 -10  18   38.95    3.09
   2 -10 -19   11.22    2.24
  -2 -10  19   14.26    2.13
  -2 -10  19   12.39    1.87
  -2 -10  20   41.65    2.89
  -2 -10  20   38.67    2.72
   2 -10 -20   41.62    3.30
  -2 -10  21    0.89    1.00
   2 -10 -21    1.67    1.33
   2 -10 -22   19.48    1.85
  -2 -10  22   21.95    1.80
  -2 -10  23    4.11    0.80
  -2 -10  23    3.70    1.04
  -2  11  23   16.65    1.35
   2 -11  22    9.43    1.09
  -2  11  22   11.74    1.54
   2 -11  21    7.98    1.28
  -2  11  21    9.80    1.63
  -2 -11 -20    1.46    1.07
   2 -11  20    2.56    1.11
  -2 -11 -19    7.22    1.63
   2 -11  19    5.80    1.43
  -2 -11 -18   42.28    3.35
   2 -11  18   37.21    2.80
  -2 -11 -17   65.38    4.39
   2 -11  17   58.58    3.50
   2 -11  16   73.16    3.87
  -2 -11 -16   70.34    4.80
   2 -11  16   72.14    3.96
  -2 -11 -15   49.19    4.30
   2 -11  15   48.19    3.35
   2 -11  14   40.52    3.06
  -2 -11 -14   40.95    4.04
   2 -11  14   41.71    4.20
   2 -11  13   25.17    3.46
   2 -11  13   25.69    2.50
  -2 -11 -13   22.71    3.41
  -2 -11 -12   31.17    3.83
   2 -11  12   26.17    2.54
   2 -11  12   23.30    3.17
  -2 -11 -11   41.75    4.20
   2 -11  11   44.78    4.13
  -2 -11 -10    9.37    2.70
   2 -11  10    9.52    2.24
  -2 -11  -9    6.37    2.48
   2 -11   9   12.95    2.63
   2 -11   8    9.91    1.76
  -2 -11  -8   10.63    6.37
   2 -11   8    8.06    1.85
   2 -11   8   10.22    2.37
  -2 -11  -8    7.15    2.22
  -2 -11  -7   23.82    3.06
   2 -11   7   18.91    2.35
   2 -11   7   25.00    3.09
   2 -11   7   22.30    2.67
  -2 -11  -7   24.87    8.22
  -2 -11  -6   49.23    4.02
  -2 -11  -6   36.34    3.26
  -2 -11  -6   48.01   10.67
   2 -11   6   46.32    3.78
   2 -11   6   51.91    3.76
   2 -11   6   51.99    3.61
  -2 -11  -5   27.73    3.02
   2 -11   5   27.67    2.89
   2 -11   5   23.63    2.67
  -2 -11  -5   21.63    2.65
  -2 -11  -5   22.91    6.89
   2 -11   4   76.55    4.28
  -2 -11  -4   73.49    4.52
  -2 -11  -4   74.40    4.54
   2 -11   4   72.88    4.54
  -2 -11  -4   67.03   11.72
  -2 -11  -3   24.28    7.09
  -2 -11  -3   34.06    3.20
  -2 -11  -3   32.63    3.22
   2 -11   3   35.23    3.20
  -2 -11  -2   90.12   12.85
  -2 -11  -1    8.17    4.89
  -2 -11   0   22.61    6.54
   2 -11  -1    9.26    5.24
  -2 -11   1   -2.22    3.61
   2 -11  -2  103.83   13.00
  -2 -11   2   80.79   11.13
  -2 -11   3   39.04    3.50
  -2 -11   3   28.37    6.83
   2 -11  -3   32.71    8.17
  -2 -11   3   32.23    3.06
  -2 -11   4   78.05    4.76
  -2 -11   4   89.57   11.39
  -2 -11   4   79.71    4.56
   2 -11  -4   80.81   12.19
  -2 -11   4   83.77    4.65
  -2 -11   5   19.21    2.70
   2 -11  -5   21.76    2.61
  -2 -11   5   19.45    2.54
   2 -11  -5   16.45    2.28
  -2 -11   5   26.30    2.80
  -2 -11   6   40.08    3.63
  -2 -11   6   43.06    3.48
   2 -11  -6   46.73    3.83
   2 -11  -6   37.67    3.17
  -2 -11   6   48.51    3.59
   2 -11  -6   42.60    9.91
  -2 -11   7   22.28    2.70
  -2 -11   7   29.13    2.89
  -2 -11   7   28.60    3.13
   2 -11  -7   27.80    3.17
   2 -11  -7   19.41    2.46
  -2 -11   8    4.33    1.54
  -2 -11   8    5.17    1.89
   2 -11  -8    4.52    1.54
   2 -11  -8    5.13    2.09
   2 -11  -9   10.80    2.35
  -2 -11   9   12.06    2.35
  -2 -11   9    9.19    2.13
  -2 -11  10    5.76    1.74
  -2 -11  10    7.24    1.98
   2 -11 -10    8.91    2.35
  -2 -11  11   45.51    3.17
  -2 -11  11   43.52    3.70
   2 -11 -11   36.21    3.87
  -2 -11  11   39.54    3.87
  -2 -11  12   31.28    3.09
  -2 -11  12   27.37    2.61
  -2 -11  12   29.00    3.48
   2 -11 -12   30.47    3.65
   2 -11 -13   21.67    3.24
  -2 -11  13   25.21    2.80
  -2 -11  13   23.34    3.26
  -2 -11  13   20.00    2.39
  -2 -11  14   38.47    3.15
   2 -11 -14   42.21    4.22
  -2 -11  14   34.78    2.98
   2 -11 -15   47.06    4.35
  -2 -11  15   42.99    3.28
  -2 -11  15   45.28    3.17
   2 -11 -16   76.18    5.13
  -2 -11  16   70.90    4.02
  -2 -11  17   62.84    3.33
   2 -11 -17   66.14    4.67
  -2 -11  17   67.12    3.76
  -2 -11  18   37.65    2.72
   2 -11 -18   43.43    3.63
  -2 -11  18   40.25    2.70
   2 -11 -19    3.83    1.78
  -2 -11  19    6.59    1.39
   2 -11 -20    0.17    1.28
  -2 -11  20   -0.54    0.93
   2 -11 -21    8.89    1.52
  -2 -11  21    5.78    1.15
  -2 -11  21    7.93    1.09
  -2 -11  22    3.83    0.91
   2 -11 -22    4.78    0.87
  -2  12  21   11.17    1.41
   2 -12  20    8.67    1.00
  -2  12  20   13.69    1.76
  -2  12  19   24.84    2.48
   2 -12  19   24.24    1.80
  -2 -12 -19   23.91    2.17
   2 -12  18    2.63    1.02
  -2  12  18    2.15    1.48
  -2 -12 -18    3.43    1.56
  -2 -12 -17   25.78    2.76
   2 -12  17   22.13    2.06
  -2 -12 -16   10.52    2.28
   2 -12  16    9.50    1.65
   2 -12  16    7.28    1.48
   2 -12  15   28.47    2.43
  -2 -12 -15   36.93    3.74
   2 -12  15   35.54    2.96
   2 -12  14   17.52    3.02
  -2 -12 -14   20.39    3.06
   2 -12  14   23.71    2.26
  -2 -12 -13    2.06    2.17
   2 -12  13    1.50    2.13
   2 -12  12   25.50    3.39
  -2 -12 -12   26.00    3.56
   2 -12  11   13.91    2.76
  -2 -12 -11   13.63    3.09
  -2 -12 -10  157.32    7.61
   2 -12  10  149.37    7.09
   2 -12   9   12.95    1.98
   2 -12   9   10.19    2.46
  -2 -12  -9   13.37    2.83
   2 -12   8  314.32    9.91
  -2 -12  -8  298.74   10.13
  -2  12   8  294.48    9.09
   2 -12   8  312.58    8.59
   2 -12   7   20.93    3.02
  -2 -12  -7   18.76    2.93
   2 -12   7   20.02    2.56
   2 -12   7   19.71    2.70
  -2  12   7   20.52    2.72
   2 -12   6    4.67    1.80
  -2  12   6    2.35    1.43
  -2 -12  -6    5.13    2.00
   2 -12   6    4.87    1.61
   2 -12   6    3.87    1.78
   2 -12   5   63.99    4.20
   2 -12   5   59.71    4.41
  -2 -12  -5   61.93    4.56
  -2 -12  -5   59.97    4.41
  -2 -12  -5   75.03   12.95
   2 -12   5   60.10    4.17
  -2 -12  -4   28.80    3.39
  -2 -12  -4   26.13    3.11
   2 -12   4   28.78    3.24
   2 -12   4   32.30    3.09
   2 -12   4   26.56    2.96
  -2 -12  -3   13.41    2.41
   2 -12   3   14.87    2.43
  -2 -12  -3   12.59    2.02
   2 -12   3   15.95    2.63
  -2 -12  -3   13.69    2.65
   2 -12   3   16.78    2.39
   2 -12   2   45.86    3.46
  -2 -12  -2   50.06    3.74
  -2 -12  -2   41.73    3.59
  -2 -12  -2   44.75    4.02
  -2 -12  -2   43.56    9.17
   2 -12   2   43.10    3.72
   2 -12   1   51.38    3.93
  -2 -12  -1   50.77    3.78
  -2 -12  -1   57.51    4.04
   2 -12   1   57.38    3.83
  -2 -12  -1   52.06    4.17
  -2 -12   0   11.76    2.26
   2 -12   0    8.89    2.26
  -2 -12   0    9.30    1.93
  -2 -12   0    8.96    2.22
   2 -12   0   10.00    1.83
  -2 -12   0    9.28    4.65
   2 -12  -1   53.84    4.17
  -2 -12   1   56.99    4.17
   2 -12  -1   56.23    3.85
  -2 -12   1   57.17   10.13
  -2 -12   1   50.25    4.13
  -2 -12   1   51.41    3.87
  -2 -12   1   49.32    3.67
  -2 -12   2   39.32    3.28
   2 -12  -2   41.34    3.70
  -2 -12   2   45.62    3.91
  -2 -12   2   38.17    8.22
  -2 -12   2   44.69    3.61
  -2 -12   2   41.78    3.83
   2 -12  -2   49.47    3.63
  -2 -12   3   22.87    3.00
   2 -12  -3   19.26    2.41
  -2 -12   3   23.13    2.80
   2 -12  -3   31.65    8.74
  -2 -12   3   20.98    2.89
   2 -12  -3   18.89    2.70
  -2 -12   4   34.04    3.59
   2 -12  -4   27.69    3.00
  -2 -12   4   27.52    3.15
   2 -12  -4   32.63    3.24
  -2 -12   4   34.71    3.30
  -2 -12   5   49.67    4.15
   2 -12  -5   56.95    4.20
  -2 -12   5   57.40    4.11
   2 -12  -5   56.93    4.06
   2 -12  -5   66.03   11.43
  -2 -12   5   63.77    4.39
   2 -12  -6    6.52    1.80
  -2 -12   6    4.65    1.80
   2 -12  -6    4.41    1.83
  -2 -12   6    2.26    1.61
   2 -12  -7   19.06    2.67
  -2 -12   7   16.54    2.78
   2 -12  -7   14.50    2.30
  -2 -12   7   21.06    2.85
  -2 -12   8  281.85    9.41
   2 -12  -8  298.19    9.69
   2 -12  -8  315.28    8.76
  -2 -12   8  304.67    9.35
  -2 -12   9    7.74    2.11
   2 -12  -9   10.89    1.98
   2 -12  -9    4.41    2.22
  -2 -12   9    7.54    2.09
   2 -12 -10  140.48    6.93
  -2 -12  10  144.20    6.69
  -2 -12  10  145.85    6.69
  -2 -12  11   15.93    2.46
  -2 -12  11   14.08    2.70
   2 -12 -11   15.26    3.00
   2 -12 -12   23.50    3.39
  -2 -12  12   25.50    2.93
  -2 -12  12   28.43    3.46
   2 -12 -13    0.61    1.93
  -2 -12  13    2.78    2.15
  -2 -12  13    0.83    1.39
  -2 -12  14   22.65    2.54
   2 -12 -14   24.74    3.43
   2 -12 -15   41.62    4.04
  -2 -12  15   34.80    2.74
  -2 -12  15   29.86    2.41
  -2 -12  16    9.13    1.56
   2 -12 -16   10.76    2.59
  -2 -12  17   21.71    1.93
   2 -12 -17   23.30    3.09
  -2 -12  18    0.76    0.65
   2 -12 -18    3.39    1.72
  -2 -12  19    0.76    0.43
   2 -12 -19   26.87    2.56
  -2 -12  20    5.15    0.91
   2 -12 -20   13.91    1.78
   2 -12 -21   10.59    1.24
  -2  13  20    9.54    1.11
  -2 -13 -19    2.76    0.93
  -2  13  19    3.67    1.09
  -2 -13 -18    1.67    1.15
  -2  13  18    4.59    1.28
   2 -13  17    0.39    0.76
  -2 -13 -17    1.26    1.39
  -2  13  17    0.39    1.17
   2 -13  16   19.48    1.87
  -2 -13 -16   21.11    2.61
  -2  13  16   19.61    2.37
   2 -13  15   80.44    3.91
  -2  13  15   82.62    4.56
  -2 -13 -15   86.27    4.87
   2 -13  14   12.98    2.06
  -2  13  14   11.17    2.15
  -2 -13 -14   11.56    2.54
   2 -13  13   13.56    2.20
   2 -13  13   13.32    2.63
  -2 -13 -13   13.72    2.83
  -2  13  13    9.95    2.06
  -2 -13 -12   43.21    4.22
   2 -13  12   43.19    4.06
  -2  13  12   40.84    3.63
   2 -13  11    2.85    2.15
  -2  13  11    0.43    1.43
  -2 -13 -11    5.30    2.43
   2 -13  10   60.43    4.63
  -2  13  10   59.34    4.26
  -2 -13 -10   56.34    4.72
   2 -13   9   18.65    2.35
   2 -13   9   15.15    2.67
  -2 -13  -9   13.24    2.83
  -2  13   9   14.41    2.26
  -2 -13  -8   27.45    3.50
   2 -13   8   30.78    3.61
   2 -13   8   26.15    2.83
  -2  13   8   26.39    2.98
  -2 -13  -7   91.36    5.74
   2 -13   7  100.46    5.22
   2 -13   7   94.16    5.67
  -2  13   7   92.20    4.91
   2 -13   6   42.62    4.00
   2 -13   6   40.43    3.54
  -2 -13  -6   37.89    3.85
   2 -13   6   37.08    3.41
   2 -13   5   75.64    5.11
   2 -13   5   71.49    4.52
   2 -13   5   77.62    4.83
  -2 -13  -5   77.12    5.09
   2 -13   4   15.78    2.74
   2 -13   4   15.41    2.74
  -2 -13  -4   15.89    2.70
   2 -13   4   14.78    2.37
  -2 -13  -3   49.43    3.59
  -2 -13  -3   48.91    4.09
   2 -13   3   45.25    4.04
   2 -13   3   50.58    3.83
   2 -13   3   50.19    4.13
   2 -13   2   56.21    3.93
  -2 -13  -2   54.17    4.06
   2 -13   2   55.47    4.35
  -2 -13  -2   55.75    4.02
   2 -13   2   49.95    4.17
  -2 -13  -2   55.93    4.63
  -2 -13  -1   66.99    4.52
   2 -13   1   62.66    4.56
   2 -13   1   71.21    4.35
  -2 -13  -1   63.75    4.85
  -2 -13  -1   68.79    4.43
   2 -13   1   62.51    4.56
  -2 -13   0    1.33    1.85
   2 -13   0   -0.96    1.33
   2 -13   0    0.67    1.65
  -2 -13   0   -0.13    1.52
  -2 -13   0    0.17    1.74
  -2 -13   0    0.35    1.35
   2 -13  -1   62.58    4.63
  -2 -13   1   67.03    4.74
   2 -13  -1   70.58    4.35
  -2 -13   1   61.27    4.35
  -2 -13   1   56.17    4.02
  -2 -13   1   60.36    4.63
  -2 -13   2   49.95    4.20
   2 -13  -2   56.17    3.91
  -2 -13   2   47.84    3.70
   2 -13  -2   52.82    3.70
   2 -13  -2   46.78    4.13
  -2 -13   2   43.99    3.76
  -2 -13   2   50.54    4.33
  -2 -13   3   48.19    4.24
   2 -13  -3   49.62    3.72
   2 -13  -3   47.58    3.63
  -2 -13   3   45.67    3.98
  -2 -13   3   48.88    3.89
   2 -13  -3   45.19    4.00
  -2 -13   4    9.87    2.41
   2 -13  -4   11.61    2.15
   2 -13  -4   14.39    2.35
   2 -13  -4   10.76    2.28
  -2 -13   4   11.43    2.30
  -2 -13   5   72.90    4.76
   2 -13  -5   74.49    4.85
   2 -13  -5   70.86    4.59
  -2 -13   5   66.49    4.96
   2 -13  -6   50.08    3.93
   2 -13  -6   45.19    3.89
  -2 -13   6   36.60    3.93
  -2 -13   6   45.01    3.83
  -2 -13   7   83.05    5.39
  -2 -13   7   92.88    5.33
   2 -13  -7   95.94    5.13
   2 -13  -7   96.59    5.52
  -2 -13   8   30.97    3.39
  -2 -13   8   33.69    3.72
   2 -13  -8   35.56    3.67
   2 -13  -8   33.45    3.17
   2 -13  -9   15.74    2.22
   2 -13  -9   14.06    2.85
  -2 -13   9   13.50    2.52
  -2 -13   9   18.39    2.98
   2 -13 -10   54.01    4.48
  -2 -13  10   57.49    4.37
  -2 -13  10   60.58    4.52
  -2 -13  11   -0.30    1.70
  -2 -13  11    0.13    1.83
   2 -13 -11   -0.93    1.91
  -2 -13  12   41.45    3.52
  -2 -13  12   42.62    3.89
   2 -13 -12   36.99    3.91
   2 -13 -13   11.98    2.59
  -2 -13  13   11.72    2.13
  -2 -13  14   12.04    1.91
   2 -13 -14   14.76    2.85
   2 -13 -15   85.12    4.87
  -2 -13  15   78.12    3.70
   2 -13 -16   21.71    2.74
   2 -13 -17   -1.37    1.54
   2 -13 -18    1.13    1.28
   2 -13 -19    5.65    1.33
   2  13  19    3.11    0.87
   2 -13 -20   13.00    1.28
  -2 -14 -18    5.91    1.04
  -2  14  18    4.11    0.78
  -2 -14 -17   20.02    1.96
  -2  14  17   19.32    1.72
   2 -14  16   19.19    1.63
  -2 -14 -16   17.15    2.11
  -2  14  16   20.52    2.00
   2 -14  15   21.87    2.00
  -2 -14 -15   22.74    2.61
  -2  14  15   24.30    2.26
   2 -14  14   33.06    2.63
  -2  14  14   32.73    2.70
  -2 -14 -14   35.65    3.24
  -2 -14 -13   15.28    2.56
   2 -14  13   14.56    2.15
  -2  14  13   14.06    2.06
   2 -14  13   17.45    2.70
  -2 -14 -12   46.10    4.11
  -2  14  12   44.88    3.30
   2 -14  12   52.38    3.67
   2 -14  12   50.60    4.06
  -2  14  11   53.82    3.63
   2 -14  11   52.30    4.22
  -2 -14 -11   61.77    4.65
   2 -14  11   59.14    4.09
   2 -14  10  129.15    6.09
  -2 -14 -10  121.46    6.39
  -2  14  10  117.87    5.26
   2 -14  10  120.46    6.06
   2 -14   9   42.06    3.78
  -2 -14  -9   45.54    4.17
  -2  14   9   41.32    3.24
   2 -14   9   43.62    3.87
   2 -14   9   45.73    3.22
   2 -14   8   64.10    4.67
  -2 -14  -8   61.25    4.80
   2 -14   8   65.42    4.04
   2 -14   7   48.54    4.15
   2 -14   7   58.49    3.91
  -2 -14  -7   52.43    4.35
  -2 -14  -6    8.00    2.30
   2 -14   6   11.80    2.65
   2 -14   6   10.09    2.20
   2 -14   5   52.60    4.30
   2 -14   5   59.90    4.37
   2 -14   5   58.21    4.13
  -2 -14  -5   56.62    4.43
  -2 -14  -4   32.41    3.39
   2 -14   4   34.76    3.22
   2 -14   4   35.26    3.59
   2 -14   4   31.60    3.46
  -2 -14  -3  162.26    6.19
  -2 -14  -3  157.82    6.80
   2 -14   3  155.35    7.04
   2 -14   3  156.19    6.98
   2 -14   3  160.17    6.50
  -2 -14  -2   40.39    3.63
  -2 -14  -2   37.41    3.56
   2 -14   2   31.26    3.52
   2 -14   2   39.69    3.83
  -2 -14  -2   40.10    3.65
   2 -14   2   35.45    3.26
   2 -14   1   77.81    5.17
  -2 -14  -1   90.18    5.22
   2 -14   1   85.75    4.98
  -2 -14  -1   91.88    5.19
   2 -14   1   80.07    4.69
   2 -14   1   83.40    5.28
  -2 -14  -1   78.92    4.80
  -2 -14   0   53.23    4.20
   2 -14   0   52.80    3.80
   2 -14   0   54.86    3.96
   2 -14   0   51.67    4.35
  -2 -14   0   52.77    3.89
  -2 -14   0   52.95    4.04
   2 -14   0   46.25    4.20
   2 -14  -1   96.83    5.02
  -2 -14   1   88.07    5.17
   2 -14  -1   93.46    4.98
  -2 -14   1   76.42    4.54
   2 -14  -1   91.33    5.54
  -2 -14   1   93.18    5.43
   2 -14  -2   34.99    3.06
  -2 -14   2   36.02    3.48
   2 -14  -2   35.28    3.78
   2 -14  -2   32.91    3.06
  -2 -14   2   36.73    3.78
  -2 -14   3  142.96    6.83
   2 -14  -3  149.89    6.89
   2 -14  -3  148.15    6.19
   2 -14  -3  148.04    5.87
  -2 -14   3  147.22    6.54
   2 -14  -4   39.95    3.83
   2 -14  -4   36.26    3.24
  -2 -14   4   34.34    3.80
   2 -14  -4   41.15    3.43
  -2 -14   4   36.69    3.56
  -2 -14   5   54.67    4.52
   2 -14  -5   61.90    4.24
   2 -14  -5   67.53    4.56
  -2 -14   5   60.14    4.35
   2 -14  -5   64.19    4.20
   2 -14  -6   13.65    2.43
  -2 -14   6   13.32    2.46
  -2 -14   6   10.04    2.65
   2 -14  -6   13.35    2.41
   2 -14  -6   10.78    2.17
  -2 -14   7   55.90    4.50
   2 -14  -7   64.58    4.13
  -2 -14   7   55.27    4.11
   2 -14  -7   62.62    4.22
   2 -14  -7   60.88    4.26
   2 -14  -8   62.12    4.43
   2 -14  -8   61.66    3.98
  -2 -14   8   56.25    4.17
   2 -14  -8   61.71    4.13
  -2 -14   8   58.84    4.56
  -2 -14   9   47.80    4.06
   2 -14  -9   49.23    4.13
  -2 -14   9   51.62    4.04
   2 -14  -9   48.80    3.35
   2 -14 -10  119.94    5.89
  -2 -14  10  125.15    5.93
  -2 -14  10  124.07    5.93
   2 -14 -11   59.95    4.33
  -2 -14  11   61.58    4.17
  -2 -14  11   59.03    4.17
   2 -14 -12   55.38    4.24
  -2 -14  12   62.49    3.96
  -2 -14  12   56.43    3.93
   2 -14 -13   15.82    2.61
  -2 -14  13   13.69    2.00
   2 -14 -14   31.00    3.04
   2 -14 -15   23.50    2.61
   2 -14 -16   14.06    1.48
   2 -14 -16   20.00    2.30
   2 -14 -17   24.24    2.17
   2 -14 -17   -0.43    0.35
   2 -14 -18    9.82    1.35
  -2 -15 -16   14.02    1.50
  -2  15  15    1.04    0.61
   2 -15  15    1.89    0.83
  -2 -15 -15    0.63    1.13
  -2 -15 -14   15.58    2.00
   2 -15  14   13.98    1.63
  -2  15  14   12.32    1.35
   2 -15  13    2.28    1.26
  -2 -15 -13    1.91    1.56
  -2  15  13    2.28    1.00
   2 -15  12    9.19    2.11
  -2 -15 -12    5.61    1.93
   2 -15  12    7.06    1.74
  -2  15  12    6.56    1.26
  -2 -15 -11   19.52    2.80
   2 -15  11   22.52    2.61
   2 -15  11   17.24    2.50
  -2  15  11   19.02    1.89
  -2 -15 -10   31.56    3.24
   2 -15  10   36.17    3.46
   2 -15  10   33.84    3.17
   2 -15   9   44.62    3.65
  -2 -15  -9   36.86    3.63
   2 -15   9   39.39    3.59
  -2 -15  -8   68.05    4.65
   2 -15   8   66.86    4.48
   2 -15   8   68.49    4.48
   2 -15   8   68.36    3.80
   2 -15   7   19.52    2.37
   2 -15   7   21.28    2.98
   2 -15   7   25.60    3.15
  -2 -15  -7   21.89    2.98
   2 -15   6    4.80    2.22
   2 -15   6    7.11    2.30
  -2 -15  -6    4.02    1.93
   2 -15   6    4.74    1.89
   2 -15   5   89.07    5.15
  -2 -15  -5   94.88    5.28
   2 -15   5   99.68    5.17
   2 -15   5   87.99    5.26
  -2 -15  -5   94.70    5.13
  -2 -15  -4   24.21    3.00
   2 -15   4   20.63    2.52
  -2 -15  -4   22.54    2.80
   2 -15   4   21.84    2.93
   2 -15   4   21.19    2.98
   2 -15   4   25.10    3.11
  -2 -15  -3   19.11    2.65
   2 -15   3   25.32    3.24
   2 -15   3   15.69    2.83
  -2 -15  -3   25.37    2.98
   2 -15   3   16.45    2.37
   2 -15   3   19.08    2.83
   2 -15   2   21.41    3.02
  -2 -15  -2   20.43    2.70
   2 -15   2   17.91    2.41
   2 -15   2   20.56    2.80
   2 -15   2   22.61    3.11
  -2 -15  -2   21.67    2.67
   2 -15   1   47.80    3.70
   2 -15   1   40.88    3.30
  -2 -15  -1   44.75    3.50
  -2 -15  -1   42.28    3.46
   2 -15   1   48.56    4.06
  -2 -15  -1   48.73    3.87
   2 -15   1   38.62    3.87
  -2 -15   0    1.07    1.76
   2 -15   0   -1.09    2.04
   2 -15   0   -1.02    1.50
   2 -15   0   -0.50    1.28
  -2 -15   0   -0.20    1.61
   2 -15   0   -1.35    2.15
   2 -15  -1   38.75    3.17
   2 -15  -1   48.71    4.17
  -2 -15   1   45.99    3.76
   2 -15  -1   38.65    3.20
   2 -15  -1   39.25    3.87
  -2 -15   1   43.28    3.80
   2 -15  -2   18.67    2.98
  -2 -15   2   23.61    3.11
  -2 -15   2   21.24    2.78
   2 -15  -2   19.13    3.02
   2 -15  -2   22.47    2.41
   2 -15  -2   18.34    2.39
   2 -15  -3   20.15    2.96
   2 -15  -3   17.21    2.35
  -2 -15   3   23.97    2.89
  -2 -15   3   18.65    2.91
  -2 -15   4   20.32    3.00
   2 -15  -4   18.74    2.33
   2 -15  -4   19.78    2.85
  -2 -15   4   21.58    2.80
   2 -15  -4   22.37    2.50
   2 -15  -5  103.70    4.93
  -2 -15   5   95.42    5.52
  -2 -15   5   99.29    5.19
   2 -15  -5  107.81    5.48
   2 -15  -5  108.24    5.00
  -2 -15   6    6.78    2.24
  -2 -15   6    3.50    1.74
   2 -15  -6    4.46    1.74
   2 -15  -6    3.67    1.41
   2 -15  -6    5.04    1.80
   2 -15  -7   19.63    2.54
   2 -15  -7   18.24    2.46
  -2 -15   7   20.19    2.83
  -2 -15   7   17.80    2.50
   2 -15  -7   14.82    2.00
   2 -15  -8   64.56    4.13
  -2 -15   8   70.25    4.28
   2 -15  -8   69.32    3.96
  -2 -15   8   65.88    4.50
  -2 -15   9   49.49    3.89
   2 -15  -9   47.41    3.59
  -2 -15   9   43.19    3.46
   2 -15  -9   48.25    3.15
   2 -15 -10   34.21    3.15
  -2 -15  10   36.89    3.20
   2 -15 -10   31.41    2.56
  -2 -15  10   37.73    3.28
  -2 -15  11   16.63    2.28
   2 -15 -11   15.15    2.33
   2 -15 -11   16.58    1.83
  -2 -15  11   17.32    2.37
   2 -15 -12    3.24    1.54
   2 -15 -12    4.80    1.17
   2 -15 -13    4.96    1.70
   2 -15 -13    2.54    0.93
   2 -15 -14   -0.30    0.28
   2 -15 -14   12.93    1.98
   2 -15 -15    2.63    1.24
   2 -15 -16   16.43    1.65
   2 -15 -17   14.98    1.30
  -2 -16 -14    6.67    1.17
   2 -16  14    4.83    0.78
  -2 -16 -13    4.72    1.26
   2 -16  13    4.22    1.00
  -2 -16 -12   20.50    2.15
   2 -16  12   21.93    1.91
   2 -16  11   12.91    1.87
   2 -16  11   15.71    1.89
  -2 -16 -11    7.63    1.26
  -2 -16 -11   14.54    2.04
   2 -16  10   27.19    2.46
  -2 -16 -10   24.17    2.52
  -2 -16 -10   20.87    1.98
   2 -16  10   28.28    2.65
   2 -16   9    7.76    1.67
   2 -16   9    6.26    1.87
  -2 -16  -9    5.56    1.46
  -2 -16  -9    6.28    1.87
   2 -16   8   11.65    2.02
  -2 -16  -8   13.39    2.28
   2 -16   8   11.13    2.15
  -2 -16  -8   11.30    1.87
   2 -16   7   26.32    2.78
   2 -16   7   27.50    2.89
  -2 -16  -7   27.26    2.76
  -2 -16  -7   25.80    2.48
  -2 -16  -6   20.71    2.56
  -2 -16  -6   18.89    2.30
   2 -16   6   20.98    2.56
   2 -16   6   20.98    2.67
   2 -16   5   27.87    2.87
   2 -16   5   29.23    2.89
  -2 -16  -5   25.71    2.72
   2 -16   5   32.86    3.20
  -2 -16  -5   31.65    2.85
   2 -16   4    9.67    2.04
  -2 -16  -4    8.22    1.83
   2 -16   4   12.19    2.41
   2 -16   4    7.65    1.87
  -2 -16  -4   10.45    2.09
   2 -16   3    2.78    1.65
   2 -16   3    2.39    1.87
   2 -16   3    3.17    1.72
  -2 -16  -3    4.41    1.61
  -2 -16  -3    1.35    1.30
   2 -16   2   32.71    2.91
  -2 -16  -2   36.19    3.11
   2 -16   2   36.41    3.50
   2 -16   2   37.52    3.46
   2 -16   1   58.62    4.28
   2 -16   1   61.62    4.26
   2 -16   1   57.23    3.63
  -2 -16  -1   54.73    3.76
   2 -16   1   61.75    3.56
   2 -16   0    0.76    1.78
   2 -16   0   -0.46    1.20
  -2 -16   0    1.46    1.52
   2 -16   0    0.04    1.89
   2 -16   0    1.61    1.26
   2 -16  -1   56.19    3.28
   2 -16  -1   54.77    4.13
  -2 -16   1   56.08    3.76
   2 -16  -1   55.34    4.13
   2 -16  -1   57.56    3.43
   2 -16  -2   37.76    3.48
   2 -16  -2   34.99    2.74
   2 -16  -2   36.41    3.39
  -2 -16   2   37.12    3.24
  -2 -16   3    3.41    1.85
  -2 -16   3    6.26    1.87
   2 -16  -3    1.89    1.78
   2 -16  -3    4.96    1.89
   2 -16  -3    5.59    1.39
  -2 -16   4   11.17    2.24
   2 -16  -4   10.78    2.20
   2 -16  -4   11.26    1.76
  -2 -16   4   10.78    1.93
   2 -16  -4   12.11    2.35
   2 -16  -5   31.39    2.46
  -2 -16   5   27.41    3.04
  -2 -16   5   26.54    2.67
   2 -16  -5   29.71    2.43
   2 -16  -5   29.37    3.17
  -2 -16   6   21.06    2.46
  -2 -16   6   21.54    2.74
   2 -16  -6   21.24    2.22
   2 -16  -6   20.54    2.06
   2 -16  -6   21.87    2.74
   2 -16  -7   25.47    2.39
  -2 -16   7   23.02    2.76
   2 -16  -7   25.56    2.15
  -2 -16   7   25.60    2.61
  -2 -16   8   15.22    2.33
   2 -16  -8   13.30    1.89
  -2 -16   8   13.45    2.06
   2 -16  -8   14.89    1.70
   2 -16  -9    6.41    1.59
  -2 -16   9    4.46    1.41
   2 -16  -9    7.72    1.28
   2 -16 -10   22.17    2.24
   2 -16 -10   -0.15    0.39
   2 -16 -11   13.67    1.85
   2 -16 -11    0.22    0.30
   2 -16 -12   19.95    2.02
   2 -16 -13    3.43    1.02
   2 -16 -14    5.30    1.04
   2 -17  11   22.58    1.59
   2 -17  10   37.02    2.15
   2 -17   9    3.41    1.17
   2 -17   9    3.41    1.24
  -2 -17  -9    0.17    0.37
   2 -17   8   42.43    2.67
   2 -17   8   40.08    2.70
   2 -17   7   23.26    2.22
  -2 -17  -7   16.61    1.63
   2 -17   7   20.95    2.17
   2 -17   6   24.45    2.39
  -2 -17  -6   19.71    1.89
   2 -17   6   25.50    2.26
   2 -17   5   11.06    1.80
  -2 -17  -5   10.30    1.59
   2 -17   5    9.28    1.76
   2 -17   4   41.56    2.85
   2 -17   4   35.78    2.91
  -2 -17  -4   34.52    2.54
   2 -17   3    4.46    1.37
  -2 -17  -3    4.89    1.33
   2 -17   3    4.17    1.56
  -2 -17  -2   12.63    1.80
   2 -17   2   14.37    1.83
   2 -17   2   14.35    2.20
   2 -17   1   33.47    2.37
  -2 -17  -1   40.02    2.80
   2 -17   1   39.25    3.13
   2 -17   0    8.06    1.33
  -2 -17   0   11.17    1.80
   2 -17   0    9.39    2.02
  -2 -17   1   37.34    2.74
   2 -17  -1   37.58    3.06
   2 -17  -2   13.04    1.41
  -2 -17   2   10.00    1.67
   2 -17  -2    9.82    1.85
  -2 -17   3    2.50    1.24
   2 -17  -3    1.85    1.43
   2 -17  -3    0.57    0.63
  -2 -17   4   34.58    2.63
   2 -17  -4   39.25    3.02
  -2 -17   5    8.74    1.54
   2 -17  -5   10.56    1.85
  -2 -17   6   24.24    2.17
   2 -17  -6   27.08    2.43
   2 -17  -7   16.61    1.48
   2 -17  -7   21.28    2.22
  -2 -17   7   22.58    2.02
   2 -17  -8   36.34    2.02
  -2 -17   8   36.69    2.35
   2 -17  -8   38.60    2.70
   2 -17  -9    2.83    1.15
   2 -17  -9    1.89    0.76
   2 -17 -10   27.82    1.67
   2 -17 -10   29.71    2.09
   2 -17 -11   17.98    1.54
   2 -18   7   10.24    1.17
   2 -18   6   41.17    2.22
   2 -18   5   15.06    1.54
   2 -18   4   12.02    1.48
  -2 -18  -3   12.17    1.09
   2 -18   3   23.19    1.98
   2 -18   2    5.02    1.22
  -2 -18  -2    2.85    0.72
   2 -18   1    0.09    1.04
  -2 -18  -1    0.26    0.59
  -2 -18   0    0.70    0.65
   2 -18   0    0.39    0.96
  -2 -18   1    1.04    0.76
   2 -18  -1    3.39    1.22
  -2 -18   2    6.02    1.09
   2 -18  -2    7.82    1.43
  -2 -18   3   16.89    1.46
   2 -18  -3   26.78    2.06
   2 -18  -4   10.02    1.37
  -2 -18   4    5.11    0.93
   2 -18  -5   11.63    1.41
  -2 -18   5    7.26    1.00
   2 -18  -6   35.69    2.04
   2 -18  -7   10.17    1.15
  -3   0   0    1.56    2.11
  -3   0   1   64.42    5.35
  -3   0  -1   69.97    5.67
  -3   0   1   62.12    5.39
  -3   0   2  194.04    8.93
  -3   0  -2  194.88    6.61
  -3   0   2  203.38    9.50
  -3   0  -2  215.77    7.48
  -3   0  -2  204.97    9.59
  -3   0  -3 2711.65   25.17
  -3   0  -3 2654.98   34.28
  -3   0   3 2695.71   35.65
  -3   0  -3 2688.22   20.65
  -3   0   3 2632.09   31.80
  -3   0  -4  145.46    8.63
  -3   0   4  136.04    7.17
  -3   0  -4  137.33    5.67
  -3   0   4  140.80    4.37
  -3   0   4  139.04    8.89
  -3   0  -4  140.20    8.30
  -3   0  -5   55.14    6.43
  -3   0  -5   47.84    5.15
  -3   0   5   45.95    4.26
  -3   0  -5   42.67    3.43
  -3   0   5   43.36    5.59
  -3   0   6 2068.77   35.99
  -3   0  -6 2017.58   31.80
  -3   0  -6 2009.67   22.37
  -3   0  -6 2095.68   37.10
  -3   0   6 2096.05   26.06
  -3   0   7   24.78    2.87
  -3   0   7   23.65    4.56
  -3   0  -7   25.30    2.78
  -3   0  -7   26.32    5.76
  -3   0  -7   23.41    3.76
  -3   0  -8   38.28    6.96
  -3   0   8   39.60    3.26
  -3   0  -8   47.17    3.85
  -3   0   8   41.49    5.98
  -3   0  -9  206.14   15.04
  -3   0  -9  205.64    8.28
  -3   0   9  219.81   13.35
  -3   0  10   99.29    9.41
  -3   0 -10   87.94   11.54
  -3   0  11  710.04   25.45
  -3   0 -11  650.90   29.47
  -3   0 -12  191.51   17.35
  -3   0  12  193.45   14.11
  -3   0 -13   46.12    9.78
  -3   0  13   43.62    7.11
  -3   0  14   -3.63    3.20
  -3   0 -14    2.54    5.24
  -3   0 -15  225.66   21.34
  -3   0  15  232.62   16.08
  -3   0 -16    1.26    4.72
  -3   0 -17   52.77   11.35
  -3   0  17   63.49    4.35
  -3   0 -17   62.08    4.54
  -3   0  17   56.84    3.74
   3   0 -17   56.23   11.50
  -3   0 -18   84.38   14.35
  -3   0  18   87.79    4.67
   3   0  18   87.05    4.20
  -3   0 -18   90.46    5.72
   3   0 -18  114.16   16.19
  -3   0  18   88.96    5.26
   3   0  19   26.60    2.54
  -3   0 -19   18.54    7.78
   3   0 -19   34.95    9.63
  -3   0  19   26.74    2.91
  -3   0 -19   22.41    3.20
  -3   0  19   20.61    2.83
   3   0  20   64.97    3.85
   3   0  20   72.45    4.83
  -3   0 -20   75.27    5.39
  -3   0  20   71.38    4.59
  -3   0  20   71.55    4.89
  -3   0  21    5.06    2.09
  -3   0 -21   -0.11    1.93
  -3   0  21    3.39    1.72
   3   0  21    3.20    1.93
   3   0  21    3.72    1.50
  -3   0  22    3.54    1.83
  -3   0  22    3.24    2.04
  -3   0 -22    0.87    1.96
   3   0  22    4.00    2.06
  -3   0  23   32.84    3.06
   3   0  23   26.60    3.17
  -3   0  23   27.41    3.24
  -3   0 -23   27.60    3.30
  -3   0  24   11.72    1.87
   3   0  24   15.37    2.52
  -3   0 -24   12.82    2.37
  -3   0  24    9.82    2.24
   3   0  25   63.64    3.96
  -3   0 -25   60.43    3.61
  -3   0  25   65.99    4.06
  -3   0  25   65.95    3.37
   3   0  26   13.32    1.96
  -3   0  26   13.80    2.02
  -3   0  27    0.87    1.13
   3   0  27    0.80    1.02
   3   0  28    0.80    0.67
  -3   0  28    0.74    0.59
   3  -1  28   18.71    1.41
   3  -1  27   49.12    2.80
  -3   1  27   46.04    2.61
  -3  -1 -26    6.93    1.46
  -3   1  26    7.63    1.63
   3  -1  26    6.63    1.72
  -3   1  25    3.98    1.59
  -3  -1 -25    6.13    1.74
   3  -1  25    4.28    1.65
   3  -1  25    4.89    1.20
  -3  -1 -24   43.06    3.83
   3  -1  24   42.12    3.63
   3  -1  24   38.86    2.80
  -3   1  24   38.97    3.46
  -3   1  24   40.84    2.83
  -3  -1 -23   24.89    3.41
   3  -1  23   22.61    2.98
  -3   1  23   19.87    2.37
  -3   1  23   24.37    3.13
   3  -1  23   23.17    2.41
  -3   1  22   26.54    2.76
   3  -1  22   26.65    2.70
  -3  -1 -22   27.06    3.63
   3  -1  22   27.50    3.28
  -3   1  22   26.21    3.24
  -3   1  21   25.37    2.78
  -3  -1 -21   28.04    3.59
   3  -1  21   22.19    2.61
   3  -1  21   29.80    3.46
  -3   1  21   31.06    3.52
   3  -1  20   12.30    2.46
  -3  -1 -20   14.82    2.98
  -3   1  20   16.56    2.85
   3  -1  20   18.04    2.35
  -3   1  20   15.06    2.41
   3   1 -19   60.69   12.63
  -3  -1 -19   52.23   12.22
  -3   1  19   54.64    4.17
  -3  -1 -19   60.45    5.02
  -3   1  19   58.38    4.00
   3  -1  19   51.86    3.59
   3   1 -18   13.87    8.19
  -3  -1 -18    7.76    6.11
   3  -1  18    4.00    1.37
  -3  -1 -18    5.09    2.20
  -3   1  18    7.48    1.85
  -3   1  18    6.02    1.65
  -3   1  18    4.11    1.70
  -3   1  17   77.49    4.43
  -3  -1 -17   61.79    4.67
  -3  -1 -17   74.86   13.72
  -3   1  17   66.90    4.37
   3  -1  17   65.51    3.67
  -3   1  17   63.62    3.83
  -3  -1 -16   76.71   13.28
  -3  -1 -15   46.43   10.28
  -3  -1 -14   83.60   12.89
  -3   1  14   89.62   10.04
  -3  -1 -13  372.40   25.41
  -3   1  13  372.66   19.61
  -3  -1 -12  171.41   16.67
  -3   1  12  183.73   13.39
  -3  -1 -11  613.56   29.08
  -3   1  11  621.86   23.78
  -3  -1 -10  444.00   15.50
  -3   1  10  450.50   19.69
  -3  -1 -10  422.72   23.28
  -3  -1  -9  463.93   22.56
  -3  -1  -9  406.02   15.13
  -3   1   9  468.36   19.58
  -3   1   8   15.69    4.35
  -3   1   8   10.89    2.06
  -3  -1  -8   10.28    4.41
  -3  -1  -8   12.06    2.78
  -3  -1  -7  931.62   27.45
  -3   1   7  916.16   25.43
  -3  -1  -7  865.15   19.82
  -3  -1  -6  484.01   18.58
  -3  -1  -6  494.95   13.91
  -3  -1  -5   36.10    5.69
  -3  -1  -5   37.45    3.98
  -3  -1  -4   42.32    5.22
  -3  -1  -4   31.02    1.72
  -3  -1  -4   43.06    4.11
  -3  -1  -3  348.01   13.28
  -3  -1  -3  359.88    7.80
  -3  -1  -3  358.21   10.93
  -3  -1  -2 1495.27   26.54
  -3  -1  -2 1495.25   22.30
  -3  -1  -2 1463.17   18.24
  -3  -1  -1  568.56   12.63
  -3  -1  -1  600.60   16.58
  -3  -1  -1  606.65   14.56
  -3  -1   0  955.70   20.32
  -3  -1   0  916.95   17.30
  -3  -1   1  587.04   15.82
  -3  -1   1  594.69   14.98
  -3  -1   2 1444.58   24.43
  -3  -1   2 1419.65   24.67
  -3  -1   3  316.93   11.35
  -3  -1   3  307.26   12.37
  -3  -1   4   44.38    3.61
  -3  -1   4   47.86    4.69
  -3   1  -4   45.32    5.09
  -3  -1   4   48.54    5.72
  -3   1  -4   44.86    4.80
  -3  -1   5   51.27    4.61
  -3   1  -5   54.93    5.46
  -3  -1   5   50.25    4.09
  -3   1  -5   51.91    5.61
  -3  -1   5   52.14    6.11
  -3   1  -6  484.88   17.80
  -3  -1   6  470.88   17.65
  -3  -1   6  478.67   13.15
  -3   1  -6  455.10   14.82
  -3  -1   7 1006.71   26.74
  -3   1  -7 1010.89   22.19
  -3   1  -7  993.22   26.95
  -3   1  -8   14.67    4.96
  -3   1  -8   11.72    2.76
  -3  -1   8   10.76    3.85
  -3   1  -9  477.82   15.37
  -3  -1   9  446.39   19.32
  -3   1  -9  442.48   21.04
  -3  -1  10  433.89   19.95
  -3   1 -10  420.17   21.95
  -3  -1  11  575.52   23.43
  -3   1 -11  550.18   26.60
  -3  -1  12  155.87   12.69
  -3   1 -12  156.56   15.32
  -3  -1  13  355.25   19.71
  -3   1 -13  350.05   23.65
  -3  -1  14   93.68   10.22
  -3   1 -14   90.68   13.26
  -3  -1  15   55.82    8.17
  -3   1 -15   38.30    9.39
  -3   1 -16   84.31   13.76
   3  -1 -16  104.70   14.61
  -3  -1  17   69.77    4.11
  -3  -1  17   56.40    4.11
  -3   1 -17   81.94   14.08
   3  -1 -17   83.68   13.58
  -3   1 -18    7.06    2.48
  -3  -1  18    2.65    1.46
  -3  -1  18    3.00    1.67
  -3   1 -18    5.96    5.54
  -3   1 -19   57.77   12.26
  -3  -1  19   58.95    4.11
   3  -1 -19   58.36   12.00
  -3   1 -19   65.36    4.96
  -3  -1  19   61.99    4.59
   3   1  20   13.80    2.39
  -3  -1  20   13.43    2.63
  -3   1 -20   10.69    2.43
  -3  -1  20   13.58    2.41
  -3  -1  21   28.67    3.46
   3   1  21   29.28    3.28
  -3  -1  21   23.80    2.89
  -3  -1  21   28.13    3.17
  -3   1 -21   27.91    3.39
  -3  -1  22   26.02    3.02
   3   1  22   25.71    3.11
  -3   1 -22   27.60    3.33
  -3  -1  22   25.63    3.24
  -3  -1  23   20.93    3.09
  -3   1 -23   19.82    2.74
   3   1  23   23.21    2.83
  -3  -1  23   18.95    2.56
   3   1  24   38.62    3.35
  -3  -1  24   34.84    3.46
  -3  -1  24   35.97    3.04
   3   1  25    2.20    1.41
  -3  -1  25    3.35    1.76
  -3  -1  25    3.65    1.39
  -3  -1  26    5.74    1.30
  -3  -1  26    7.76    1.80
   3   1  26    8.26    1.56
   3   1  27   46.15    2.48
  -3  -1  27   50.27    2.85
  -3  -1  27   37.30    1.85
  -3  -1  28   20.93    1.54
   3  -2  28   16.37    1.39
   3  -2  27   39.06    2.54
  -3   2  27   33.71    2.02
  -3   2  26    7.24    1.61
   3  -2  26    7.46    1.78
   3  -2  26    7.46    1.22
  -3  -2 -26    8.54    1.63
   3  -2  25   14.80    1.80
   3  -2  25   14.85    2.37
  -3  -2 -25   13.35    2.28
  -3   2  25   13.17    2.06
   3  -2  24   20.65    2.76
   3  -2  24   23.76    2.43
  -3  -2 -24   23.52    3.15
  -3   2  24   21.74    2.63
  -3  -2 -23   67.29    5.04
  -3   2  23   66.23    4.35
   3  -2  23   66.84    4.67
   3  -2  23   62.95    3.91
  -3   2  22   34.71    3.46
   3  -2  22   36.41    3.20
  -3  -2 -22   36.32    4.06
   3  -2  22   36.47    3.80
   3  -2  21   54.51    4.41
  -3   2  21   54.40    4.26
   3  -2  21   53.25    3.89
  -3  -2 -21   54.43    4.89
  -3   2  20   29.95    3.33
   3  -2  20   28.02    3.33
  -3  -2 -20   29.71    3.89
   3  -2  20   28.39    3.00
  -3   2  20   27.00    2.80
  -3   2  19   29.17    2.83
  -3  -2 -19   37.91    4.22
   3  -2  19   28.58    2.87
  -3   2  19   31.73    3.41
  -3  -2 -18   79.18    5.54
  -3   2  18   69.95    4.56
  -3   2  18   74.29    4.26
  -3  -2 -18   71.45   14.02
   3  -2  18   74.90    4.28
  -3   2  17   48.08    3.50
  -3  -2 -17   47.14   10.93
   3  -2  17   45.04    3.20
  -3   2  17   50.88    3.80
  -3  -2 -17   52.04    4.46
  -3  -2 -16   -6.19    5.17
  -3  -2 -15   66.97   11.95
  -3  -2 -14   18.80    6.83
  -3   2  14   23.26    5.59
  -3  -2 -13  401.87   26.24
  -3   2  13  416.00   20.80
  -3  -2 -12   42.34    9.04
  -3  -2 -12   50.06    6.54
  -3   2  12   51.43    7.52
  -3  -2 -11  633.97   29.54
  -3  -2 -11  606.73   22.41
  -3   2  11  686.87   25.47
  -3   2  10   40.82    6.89
  -3  -2 -10   39.28    8.15
  -3  -2 -10   33.89    5.74
  -3   2   9   47.99    7.39
  -3  -2  -9   40.65    7.32
  -3  -2  -9   45.04    5.96
  -3  -2  -8   81.86    7.48
  -3  -2  -8   75.60    9.43
  -3  -2  -7 1025.17   29.58
  -3  -2  -7 1016.26   24.37
  -3  -2  -6    8.46    4.30
  -3  -2  -6    8.69    2.98
  -3  -2  -5 2882.60   37.89
  -3  -2  -4 3279.67   38.84
  -3  -2  -4 3258.78   25.13
  -3  -2  -3  286.43    8.61
  -3  -2  -3  295.95   11.65
  -3  -2  -2  203.60    7.89
  -3  -2  -2  206.95    9.63
  -3  -2  -1  417.46   12.00
  -3  -2   0  809.44   18.02
   3  -2  -1  314.89    6.74
  -3  -2   1  408.20   13.48
  -3  -2   2  180.95    9.63
  -3  -2   3  293.37   12.61
  -3   2  -3  286.09    9.72
  -3   2  -4 3194.85   35.28
  -3  -2   4 3146.58   43.04
  -3  -2   4 3057.14   34.10
  -3  -2   5 2613.27   33.30
  -3  -2   5 2634.70   41.15
  -3   2  -6   13.13    3.70
  -3  -2   6   10.63    3.15
  -3  -2   6   10.82    4.22
  -3   2  -7  916.77   21.58
  -3  -2   7  899.04   26.47
  -3   2  -7  911.77   25.32
  -3  -2   7  919.71   22.39
  -3   2  -8   76.03    6.46
  -3  -2   8   75.84    7.04
  -3  -2   8   81.92    8.69
  -3   2  -8   78.14    8.82
  -3   2  -9   31.65    6.96
  -3  -2   9   33.30    6.04
  -3  -2   9   28.84    4.72
  -3   2  -9   38.86    4.52
  -3  -2  10   43.78    7.28
  -3   2 -10   49.04    8.24
  -3  -2  11  692.57   26.41
  -3   2 -11  655.49   28.28
  -3  -2  12   57.97    8.30
  -3   2 -12   46.45    9.09
  -3   2 -13  419.24   25.39
  -3  -2  13  429.80   22.06
  -3   2 -14   31.06    7.93
  -3  -2  14   30.50    6.41
   3  -2 -14   44.84    9.46
  -3  -2  15   64.32    9.17
  -3   2 -15   89.36   13.65
   3  -2 -15   87.33   13.02
   3  -2 -16    4.69    4.22
  -3   2 -16    2.93    5.06
   3  -2 -17   53.10   11.30
  -3  -2  17   46.01    3.50
  -3   2 -17   39.78    9.93
  -3  -2  17   55.69    4.11
   3  -2 -18   75.75   12.50
  -3   2 -18   56.14   11.52
  -3   2 -18   75.10    4.91
  -3  -2  18   78.73    5.02
  -3  -2  18   73.73    4.43
  -3  -2  19   41.45    3.85
   3   2  19   41.56    3.65
  -3  -2  19   32.63    3.24
  -3   2 -19   42.56    4.00
   3   2  20   29.04    3.22
  -3  -2  20   26.34    2.98
  -3  -2  20   27.34    3.46
  -3  -2  21   46.32    4.15
   3   2  21   46.08    3.80
  -3  -2  21   41.80    3.56
  -3  -2  22   34.26    3.52
   3   2  22   35.19    3.30
  -3  -2  22   37.58    3.76
  -3  -2  23   49.67    3.87
   3   2  23   49.73    3.76
  -3  -2  23   52.49    4.24
   3   2  24   21.08    2.52
  -3  -2  24   18.52    2.85
  -3  -2  24   20.48    2.52
  -3  -2  25   14.76    2.04
  -3  -2  25   14.00    2.35
   3   2  25   14.80    2.02
  -3  -2  26    4.93    1.56
   3   2  26    7.65    1.43
  -3  -2  26    4.91    1.26
   3   2  27   30.17    1.78
  -3  -2  27   33.89    2.39
  -3  -2  27   28.93    1.80
  -3  -2  28   12.98    1.26
   3  -3  27    2.09    1.04
   3  -3  26    9.41    1.41
  -3   3  26    8.65    1.33
   3  -3  26   10.54    1.83
  -3   3  25    2.04    1.22
   3  -3  25    1.41    1.52
   3  -3  25    0.41    1.15
  -3  -3 -25   -0.54    1.59
   3  -3  24   94.16    4.43
  -3  -3 -24  103.98    5.72
  -3   3  24   91.96    4.52
   3  -3  24   96.33    5.15
  -3   3  23   29.73    2.96
   3  -3  23   30.08    2.96
   3  -3  23   30.82    3.43
  -3  -3 -23   33.02    3.83
  -3  -3 -22   51.54    4.83
   3  -3  22   53.45    3.83
   3  -3  22   58.19    4.50
  -3   3  22   60.34    4.20
  -3  -3 -21   32.06    4.15
   3  -3  21   33.89    3.17
  -3   3  21   27.91    3.09
   3  -3  21   28.95    3.46
   3  -3  20  434.59   11.48
  -3   3  20  414.22   10.78
  -3  -3 -20  439.89   13.24
   3  -3  20  411.28   10.13
  -3  -3 -19   95.70    6.35
  -3   3  19   87.96    5.09
   3  -3  19   89.42    4.85
  -3   3  18  211.82    7.67
  -3  -3 -18  222.90    9.11
   3  -3  18  206.49    7.02
  -3  -3 -18  224.27   23.26
  -3   3  17  135.46    5.98
   3  -3  17  128.98    5.46
  -3  -3 -17  130.07   17.78
  -3  -3 -17  139.98    7.19
  -3  -3 -16  212.66   21.56
  -3  -3 -16  192.93    7.93
  -3  -3 -15  140.30   17.32
  -3  -3 -14  125.02   15.65
  -3   3  14  130.55   12.15
  -3  -3 -13    6.80    4.83
  -3  -3 -13    4.65    2.67
  -3   3  13    4.74    3.15
  -3  -3 -12   10.80    5.59
  -3  -3 -12    6.46    3.11
  -3   3  12   12.98    4.48
  -3   3  11  628.58   25.15
  -3  -3 -11  602.47   29.45
  -3  -3 -10   23.58    6.56
  -3  -3 -10   15.67    5.17
  -3  -3  -9  339.01   20.08
  -3  -3  -9  326.78   16.91
  -3  -3  -8  803.33   25.60
  -3  -3  -8  839.98   29.28
  -3  -3  -7  764.36   23.69
  -3  -3  -6 1086.53   27.60
  -3  -3  -5  520.40   18.28
  -3  -3  -4  415.02   15.71
  -3  -3  -3  109.03    8.26
  -3  -3  -3  103.85    6.24
  -3  -3  -2 1357.07   27.15
  -3  -3  -2 1367.11   23.47
  -3  -3  -1   74.81    6.06
   3  -3   0  416.48   11.39
  -3  -3   0  413.78   14.11
  -3  -3   1   72.51    6.78
  -3  -3   2 1329.51   27.52
  -3  -3   2 1394.61   28.19
  -3   3  -3  100.61    5.28
  -3  -3   3  101.44    8.26
  -3  -3   3  100.68    8.26
  -3   3  -4  438.67   12.54
  -3  -3   4  450.34   17.50
  -3  -3   5  477.45   18.71
  -3   3  -5  461.45   14.65
  -3  -3   5  467.56   16.15
  -3  -3   6 1172.93   26.58
  -3  -3   6 1160.93   30.23
  -3   3  -6 1175.56   25.60
  -3  -3   7  648.25   23.50
  -3  -3   7  663.75   21.11
  -3   3  -7  652.70   20.98
  -3  -3   8  804.90   27.06
  -3   3  -8  816.94   25.39
  -3  -3   8  823.42   24.69
  -3  -3   9  405.39   19.89
  -3  -3   9  409.55   18.39
  -3   3  -9  400.96   19.08
  -3   3  -9  433.37   15.50
  -3  -3  10   24.28    5.11
  -3  -3  10   28.73    6.09
  -3   3 -10   28.56    6.61
  -3  -3  11  661.66   26.82
  -3  -3  11  654.51   25.32
  -3   3 -11  630.66   27.45
  -3  -3  12   11.56    4.35
  -3  -3  12    9.37    4.39
  -3   3 -12    7.41    4.54
   3  -3 -12   17.15    6.50
  -3   3 -13    3.98    4.41
  -3  -3  13    7.67    4.11
  -3  -3  13    4.67    3.33
   3  -3 -13    9.76    5.59
  -3  -3  14  120.37   12.13
   3  -3 -14  134.52   14.58
  -3  -3  14  109.07   11.67
  -3   3 -14  113.05   14.15
  -3  -3  15  155.82   14.06
  -3  -3  15  134.46   13.26
   3  -3 -15  145.67   15.82
  -3   3 -15  145.11   16.30
   3  -3 -16  218.94   19.58
  -3  -3  16  205.29    6.78
  -3   3 -16  203.97   20.30
  -3  -3  17  129.02    5.65
   3  -3 -17  122.22    5.74
  -3  -3  17  139.02    6.37
  -3   3 -17  135.67   17.15
   3  -3 -17  139.13   16.17
  -3   3 -18  190.97   20.21
  -3  -3  18  194.54    7.04
   3   3  18  198.66    7.02
  -3  -3  18  199.32    7.87
  -3  -3  19   89.20    5.02
   3   3  19   90.44    4.96
  -3  -3  19   87.66    5.50
  -3  -3  20  450.04   11.89
  -3  -3  20  432.28   10.69
   3   3  20  432.69   10.56
  -3  -3  21   29.93    3.50
  -3  -3  21   31.67    3.33
   3   3  21   29.63    3.00
   3   3  22   61.71    4.09
  -3  -3  22   56.82    4.04
  -3  -3  22   64.12    4.67
  -3  -3  23   31.54    3.28
   3   3  23   31.86    2.96
  -3  -3  23   32.15    3.46
  -3  -3  24   99.55    4.85
   3   3  24   95.99    4.41
  -3  -3  24   99.27    5.15
  -3  -3  25   -0.22    1.50
  -3  -3  25    0.35    1.30
   3   3  25    0.02    0.98
  -3  -3  26   10.95    1.80
  -3  -3  26   11.15    1.61
  -3  -3  27    0.59    0.78
  -3  -3  27    1.52    0.83
  -3  -3  27    0.20    0.93
   3  -4  27    6.09    1.20
   3  -4  26   26.97    1.76
   3  -4  26   31.67    2.17
   3  -4  26   35.78    2.61
  -3  -4 -25   28.65    3.02
   3  -4  25   24.71    2.59
   3  -4  25   31.06    2.48
   3  -4  24   36.04    3.28
  -3  -4 -24   41.17    3.91
   3  -4  24   35.02    2.91
  -3   4  24   35.17    2.65
  -3   4  23   45.23    3.26
   3  -4  23   46.84    3.85
  -3  -4 -23   41.41    4.20
   3  -4  23   44.30    3.43
   3  -4  22   43.38    3.85
   3  -4  22   43.54    3.52
  -3  -4 -22   40.39    4.43
  -3   4  22   36.21    3.11
   3  -4  21   70.97    4.48
  -3   4  21   81.90    4.76
   3  -4  21   74.08    4.91
  -3  -4 -21   77.92    5.80
   3  -4  20   29.45    3.37
   3  -4  20   30.89    3.09
  -3  -4 -20   34.54    4.22
  -3   4  20   32.71    3.15
  -3   4  19  232.16    7.82
  -3  -4 -19  239.48    9.85
   3  -4  19  230.42    7.65
  -3  -4 -18   88.62    6.06
   3  -4  18   77.05    4.52
  -3   4  18   92.79    4.96
   3  -4  17   11.65    2.04
  -3   4  17   12.78    2.15
  -3  -4 -17   16.78    3.06
   3  -4  16   76.49    4.65
  -3  -4 -16   79.64   14.32
  -3  -4 -16   82.10    5.43
  -3  -4 -15  152.67   18.15
  -3   4  14  111.16   11.48
  -3  -4 -14  105.61   14.78
  -3  -4 -13  239.16   20.82
  -3   4  13  252.70   17.43
  -3  -4 -13  221.62   16.87
  -3   4  12   21.32    5.65
  -3  -4 -12   11.93    4.80
  -3  -4 -12   20.24    5.50
  -3  -4 -11  140.54   15.11
  -3  -4 -11  107.40   12.19
  -3  -4 -10   25.06    6.50
  -3  -4  -9  579.78   24.69
  -3  -4  -8  366.64   19.06
  -3  -4  -7  516.12   21.71
  -3  -4  -6  458.80   20.02
  -3  -4  -5 1303.12   31.89
  -3  -4  -4   75.05    8.00
   3  -4   4   62.16    3.04
  -3  -4  -3 1437.87   26.54
  -3  -4  -3 1470.21   32.00
  -3  -4  -2  932.38   21.71
   3  -4   2  903.77   21.74
  -3  -4  -1  171.58   10.87
  -3  -4  -1  163.37    9.80
   3  -4   1  167.65    9.06
  -3  -4   0  363.14   14.85
  -3  -4   0  348.21   15.22
   3  -4   0  352.51   12.32
  -3  -4   1  148.87   10.11
  -3  -4   1  162.13   10.43
  -3  -4   2  943.51   25.19
  -3  -4   2  962.68   25.67
  -3  -4   3 1348.36   31.39
  -3  -4   3 1327.90   30.56
  -3   4  -4   72.71    4.91
  -3  -4   4   73.10    7.89
  -3  -4   4   71.18    8.35
   3  -4  -4   71.62    4.69
  -3  -4   5 1178.82   31.15
  -3   4  -5 1159.21   22.00
   3  -4  -5 1096.66   20.84
  -3   4  -6  405.92   14.69
   3  -4  -6  399.55   14.37
  -3  -4   6  428.67   19.78
  -3  -4   6  414.39   17.76
  -3   4  -7  401.03   16.21
  -3  -4   7  419.37   20.21
   3  -4  -7  408.89   16.11
  -3  -4   7  422.48   18.76
  -3  -4   8  382.79   19.76
   3  -4  -8  393.72   17.08
  -3  -4   8  396.76   18.82
  -3  -4   9  591.15   25.21
   3  -4  -9  559.54   21.80
  -3  -4   9  569.39   23.43
  -3  -4  10   52.17    7.85
   3  -4 -10   51.14    7.87
  -3   4 -10   68.01    9.02
  -3  -4  10   46.32    7.82
  -3  -4  11  142.63   12.82
  -3  -4  11  134.74   12.76
   3  -4 -11  132.70   12.45
  -3   4 -11  162.19   14.52
   3  -4 -12   19.74    5.41
  -3   4 -12   17.11    5.78
  -3  -4  12    7.50    3.78
  -3  -4  12   14.30    4.74
  -3  -4  13  249.66   17.93
   3  -4 -13  260.70   18.71
  -3  -4  13  270.33   18.74
  -3   4 -14  133.78   15.15
  -3  -4  14  110.81   12.30
   3  -4 -14  122.07   13.43
  -3  -4  14  133.09   13.54
  -3  -4  15  182.21   16.19
   3  -4 -15  177.95   16.78
  -3  -4  15  181.06   15.82
  -3   4 -15  188.49   18.65
   3  -4 -16   80.21    4.72
  -3  -4  16   91.27    5.09
  -3  -4  16   82.86    4.48
  -3   4 -16   82.90   13.11
   3  -4 -16   79.90   11.74
   3  -4 -17   11.37    5.22
  -3  -4  17    8.46    2.15
  -3  -4  17    9.11    2.04
  -3  -4  18   93.83    5.54
  -3   4 -18   54.27   11.02
   3  -4 -18   65.38   11.89
  -3  -4  18   80.10    4.78
  -3  -4  19  240.18    8.02
  -3  -4  19  236.53    8.61
  -3  -4  20   33.54    3.39
  -3  -4  20   27.76    3.33
  -3  -4  21   67.82    4.78
  -3  -4  21   58.40    4.24
   3  -4 -21   53.54    3.67
  -3  -4  22   36.19    3.65
  -3  -4  22   38.65    3.56
  -3  -4  23   38.84    3.54
  -3  -4  23   37.73    3.48
  -3  -4  24   32.15    3.06
  -3  -4  24   33.04    3.13
  -3  -4  25   27.93    2.59
  -3  -4  25   22.89    2.43
  -3  -4  26   29.54    2.33
  -3  -4  26   32.19    2.30
  -3  -4  27    5.22    0.91
  -3  -4  27    6.69    1.17
  -3  -4  27    7.89    1.13
   3  -5  27   13.72    1.26
   3  -5  26    2.98    1.09
   3  -5  26    3.83    1.15
   3  -5  25   35.67    2.56
   3  -5  25   30.86    2.61
   3  -5  24   36.19    3.06
  -3  -5 -24   36.06    3.70
   3  -5  24   36.86    2.91
   3  -5  23   22.08    2.59
  -3  -5 -23   22.58    3.37
   3  -5  23   20.65    2.65
   3  -5  22   22.58    2.91
  -3  -5 -22   29.86    3.85
   3  -5  22   25.21    2.91
   3  -5  21   87.07    4.85
   3  -5  21   91.16    5.30
  -3  -5 -21   92.22    6.35
   3  -5  20   41.97    3.83
  -3  -5 -20   33.28    4.33
   3  -5  20   31.60    3.30
   3  -5  19   55.14    4.06
   3  -5  19   53.45    4.17
  -3  -5 -19   52.10    5.11
  -3  -5 -18   84.12    6.06
   3  -5  18  101.31    5.52
  -3  -5 -17  143.41    7.50
   3  -5  17  161.52    6.43
  -3  -5 -16   32.91    3.87
   3  -5  16   29.95    3.33
   3  -5  15   -1.22    1.30
  -3  -5 -15    3.04    2.13
  -3  -5 -14    3.28    3.20
  -3   5  13  357.34   21.41
  -3  -5 -13  319.71   22.78
  -3  -5 -12  443.82   25.63
  -3  -5 -11  248.61   18.56
  -3  -5 -10  210.86   16.50
  -3  -5  -9  262.48   18.61
  -3  -5  -8  215.73   16.04
  -3  -5  -7  834.46   30.32
  -3  -5  -6  203.49   14.69
  -3  -5  -5  106.90   10.65
  -3  -5  -4  557.22   22.63
   3  -5   4  553.07   12.06
   3  -5   4  515.75   20.06
  -3  -5  -3    1.70    3.48
   3  -5   3    2.20    1.56
   3  -5   3    5.06    3.17
  -3  -5  -2  142.17    9.89
   3  -5   2  134.78    9.56
  -3  -5  -2  147.15   11.32
  -3  -5  -1   22.02    5.06
   3  -5   1   22.21    4.13
  -3  -5  -1   22.08    4.46
  -3  -5   0  118.35    9.85
  -3  -5   0  118.94    9.67
  -3  -5   1   22.28    4.89
  -3  -5   1   23.93    5.28
  -3  -5   2  140.83   11.02
  -3  -5   2  134.41   10.67
  -3  -5   3    2.20    3.56
  -3  -5   3    3.20    3.46
  -3  -5   4  534.27   22.52
  -3  -5   4  531.46   21.11
  -3  -5   5  133.57   11.91
  -3  -5   5  135.13   11.50
   3  -5  -5  135.81    6.61
  -3   5  -5  137.24    7.24
  -3  -5   6  226.23   15.61
   3  -5  -6  227.49    9.89
  -3   5  -6  243.05   10.78
  -3  -5   7  940.94   30.00
  -3  -5   7  942.81   32.28
   3  -5  -7  898.12   21.95
  -3   5  -7  903.16   23.21
  -3  -5   8  204.45   15.91
  -3   5  -8  191.73   11.89
  -3  -5   8  231.09   15.71
   3  -5  -8  202.77   11.69
   3  -5  -9  327.54   15.93
  -3  -5   9  356.47   19.91
  -3  -5   9  343.97   20.41
  -3  -5  10  256.46   17.71
  -3  -5  10  241.59   17.65
   3  -5 -10  240.07   14.78
  -3  -5  11  275.39   19.41
  -3  -5  11  265.70   18.48
   3  -5 -11  258.11   16.19
  -3  -5  12  465.88   25.06
  -3  -5  12  489.58   25.76
   3  -5 -12  491.68   23.58
  -3  -5  13  352.32   22.47
  -3  -5  13  369.57   22.87
   3  -5 -13  429.72   23.50
   3  -5 -14    7.89    4.28
  -3  -5  14    4.50    3.65
  -3   5 -14   14.98    6.59
  -3  -5  14    5.43    3.70
  -3  -5  15   -0.09    3.35
  -3   5 -15   12.32    6.26
  -3  -5  15    7.74    4.06
  -3  -5  15    1.76    1.30
  -3  -5  16   27.84    2.93
  -3  -5  16   33.15    3.11
  -3  -5  16   31.91    7.72
  -3  -5  17  148.43    6.17
  -3  -5  17  138.63    6.41
  -3  -5  18   81.79    5.06
  -3  -5  18   87.14    4.89
  -3  -5  19   51.27    4.15
  -3  -5  19   50.45    3.93
  -3  -5  20   34.04    3.39
  -3  -5  20   34.73    3.54
   3  -5 -20   26.97    3.13
   3  -5 -21   77.71    4.59
  -3  -5  21   96.09    5.41
  -3  -5  21   98.42    5.26
  -3  -5  22   31.56    3.22
  -3  -5  22   29.19    3.17
   3  -5 -22   21.11    2.50
  -3  -5  23   22.15    2.74
  -3  -5  23   20.84    2.78
  -3  -5  24   38.02    3.13
  -3  -5  24   34.02    2.98
  -3  -5  25   36.23    2.74
  -3  -5  25   32.45    2.56
  -3  -5  26    4.11    1.13
  -3  -5  26    5.83    1.24
  -3  -5  26    3.85    1.15
  -3  -5  27   10.22    1.04
  -3  -5  27    8.00    0.96
  -3  -5  27    9.65    1.09
   3  -6  26    9.24    1.26
   3  -6  26    6.76    1.09
   3  -6  25   13.82    1.67
   3  -6  25   14.04    1.74
   3  -6  24    4.13    1.52
   3  -6  24    2.39    1.33
  -3  -6 -24    1.98    1.93
   3  -6  23   20.37    2.41
  -3  -6 -23   22.43    3.35
   3  -6  23   22.13    2.65
  -3  -6 -22    1.39    2.30
   3  -6  22    0.28    1.74
   3  -6  22    0.98    1.56
   3  -6  21    0.74    1.72
  -3  -6 -21    1.89    2.39
   3  -6  21    2.78    1.80
   3  -6  20   20.41    2.80
  -3  -6 -20   28.47    4.04
   3  -6  20   22.45    2.96
  -3  -6 -19   63.27    5.41
   3  -6  19   61.19    4.61
   3  -6  19   71.53    4.78
   3  -6  18   62.32    4.46
  -3  -6 -18   56.64    5.13
   3  -6  17   67.49    4.56
  -3  -6 -17   58.25    5.09
   3  -6  16  124.48   15.69
   3  -6  16  109.35    5.26
   3  -6  15   69.40    4.06
  -3  -6 -15   45.12    4.22
  -3  -6 -14   29.63    7.96
  -3  -6 -14   48.21    4.09
  -3  -6 -13  118.79   14.72
  -3  -6 -12   90.38   12.54
  -3  -6 -11   40.91    8.74
  -3  -6 -10  126.20   14.24
  -3  -6  -9  215.66   17.80
  -3  -6  -8   80.01   10.91
  -3  -6  -7 1016.73   36.39
   3  -6   7 1100.18   35.52
   3  -6   6  932.07   31.39
  -3  -6  -6  931.79   33.80
   3  -6   5  182.91   13.65
  -3  -6  -5  195.54   15.19
  -3  -6  -4  211.62   15.65
   3  -6   4  220.99   14.35
   3  -6   3  209.40    9.63
  -3  -6  -3  200.06   14.76
   3  -6   3  197.80   13.04
  -3  -6  -2  374.66   17.48
   3  -6   2  341.32   16.41
  -3  -6  -2  340.58   18.71
   3  -6   2  318.93   13.41
  -3  -6  -1  202.58   14.24
  -3  -6  -1  206.21   13.61
  -3  -6   0    3.80    4.24
  -3  -6   0    3.17    3.28
  -3  -6   1  190.88   13.35
  -3  -6   1  177.49   13.11
  -3  -6   2  353.73   18.04
  -3  -6   2  343.95   18.19
  -3  -6   3  185.82   13.41
  -3  -6   3  196.47   14.19
  -3  -6   4  229.18   14.87
  -3  -6   4  233.53   16.04
  -3  -6   5  166.65   13.02
  -3  -6   5  155.52   13.43
  -3  -6   6  894.17   32.15
  -3  -6   7 1057.32   35.82
  -3  -6   8   85.36   10.76
  -3  -6   9  220.40   17.26
  -3  -6   9  230.90   17.41
  -3  -6  10  186.86   16.32
  -3  -6  10  182.41   16.08
  -3  -6  11   49.84    8.63
  -3  -6  11   50.69    9.13
  -3  -6  12   96.20   12.45
  -3  -6  12   81.03   11.32
  -3  -6  13  117.66   13.76
  -3  -6  13  127.61   14.02
  -3  -6  14   48.36    8.80
  -3  -6  14   48.34    9.48
  -3  -6  15   27.60    6.96
  -3  -6  15   52.54    3.83
  -3  -6  15   37.32    8.09
  -3  -6  15   41.28    3.33
  -3  -6  16   74.25   11.30
  -3  -6  16   84.68    4.89
  -3  -6  16   80.12    4.54
  -3  -6  17   47.36    3.72
  -3  -6  17   52.45    4.00
  -3  -6  18   48.49    3.93
  -3  -6  18   48.47    3.80
   3  -6 -18   34.58    4.20
  -3  -6  19   63.23    4.41
  -3  -6  19   59.97    4.26
   3  -6 -19   56.58    4.37
  -3  -6  20   22.54    2.80
   3  -6 -20   16.45    2.74
  -3  -6  20   23.52    2.89
  -3  -6  21    2.28    1.70
   3  -6 -21    4.35    1.85
  -3  -6  21    3.52    1.93
   3  -6 -22    0.72    1.37
  -3  -6  22    2.98    1.67
  -3  -6  22    1.93    1.85
  -3  -6  23   18.82    2.61
  -3  -6  23   18.39    2.28
  -3  -6  24    5.35    1.72
  -3  -6  24    2.70    1.35
  -3  -6  25   16.30    1.91
  -3  -6  25   15.08    1.80
  -3  -6  25   14.13    1.63
  -3  -6  26    7.09    1.20
  -3  -6  26    9.35    1.26
  -3  -6  26    6.76    1.02
   3  -7  26    7.35    1.00
   3  -7  25    6.80    1.30
  -3   7  25    2.35    0.74
   3  -7  25    5.41    1.02
   3  -7  24   36.45    2.61
   3  -7  24   30.93    2.26
   3  -7  23   40.86    3.06
   3  -7  23   36.56    2.74
  -3  -7 -22   39.49    4.02
   3  -7  22   41.47    3.15
   3  -7  22   41.54    3.37
  -3  -7 -21   24.87    3.72
   3  -7  21   22.37    2.56
   3  -7  21   20.56    2.78
   3  -7  20   37.21    3.37
   3  -7  20   36.54    3.67
  -3  -7 -20   34.71    4.26
  -3  -7 -19    0.98    2.52
   3  -7  19    1.50    1.78
   3  -7  19   -0.11    1.43
   3  -7  18  231.94    7.89
   3  -7  18  258.48    8.37
  -3  -7 -17   11.91    2.96
   3  -7  17   15.22    2.52
   3  -7  16  169.63    6.48
  -3  -7 -16  113.24    6.72
   3  -7  15  201.34   20.76
  -3  -7 -15  180.36    6.80
  -3  -7 -15  182.43    8.13
   3  -7  14  164.74   18.37
  -3  -7 -14  145.85    6.06
  -3  -7 -14   90.70   12.82
  -3  -7 -14  161.87    7.48
   3  -7  14  227.44    7.43
  -3  -7 -13  111.03    5.93
   3  -7  13  107.53   14.65
  -3  -7 -13  103.38   14.95
   3  -7  13  133.78    5.83
   3  -7  13  100.83    5.37
  -3  -7 -12    5.15    4.33
   3  -7  12    1.00    3.70
  -3  -7 -11  393.96   26.87
   3  -7  11  404.09   26.37
  -3  -7 -10  200.27   19.06
   3  -7  10  200.25   18.06
   3  -7   9  105.35   12.52
  -3  -7  -9   93.14   12.87
  -3  -7  -8  260.13   20.45
   3  -7   8  264.85   19.37
   3  -7   7    4.50    4.04
  -3  -7  -7    5.02    4.09
   3  -7   6    4.72    4.00
  -3  -7  -6    4.59    3.63
   3  -7   5  195.45   15.04
  -3  -7  -5  204.47   16.78
   3  -7   4  226.57   15.48
  -3  -7  -4  224.40   17.35
   3  -7   3  295.54   17.24
  -3  -7  -3  316.43   19.76
  -3  -7  -2  177.06   14.56
   3  -7   2  182.60   10.95
  -3  -7  -1   98.90   10.95
   3  -7   1   96.88    8.52
  -3  -7   0 1004.48   32.49
  -3  -7   0  946.98   32.17
  -3  -7   1   87.25   10.02
  -3  -7   1  100.64   10.65
  -3  -7   2  204.69   14.78
  -3  -7   2  175.56   14.26
  -3  -7   3  292.30   17.58
  -3  -7   3  296.24   18.69
  -3  -7   4  238.75   16.21
  -3  -7   4  249.01   17.28
  -3  -7   5  165.32   13.63
  -3  -7   5  162.43   14.43
  -3  -7   6    4.76    4.52
  -3  -7   6    6.02    3.78
  -3  -7   7    0.76    3.85
  -3  -7   8  254.92   19.11
  -3  -7   9   89.27   11.80
  -3  -7  10  184.47   16.80
  -3  -7  11  401.85   24.78
  -3  -7  12   -2.50    4.24
  -3  -7  13   97.57   12.65
  -3  -7  14  137.91   14.52
  -3  -7  14  113.57    5.11
  -3  -7  15  181.65    6.63
  -3  -7  15  155.67   15.52
  -3  -7  16   94.62    5.04
   3  -7 -16   85.79    5.72
  -3  -7  16   90.83    4.87
  -3  -7  17    8.93    1.98
  -3  -7  17    9.80    2.15
   3  -7 -17   11.35    2.74
  -3  -7  18  189.93    7.11
   3  -7 -18  180.69    7.56
  -3  -7  18  175.76    6.80
   3  -7 -19   -0.65    1.78
  -3  -7  19   -0.43    1.43
  -3  -7  19    0.11    1.72
  -3  -7  20   42.08    3.48
   3  -7 -20   43.17    3.63
  -3  -7  20   42.34    3.41
   3  -7 -21   15.78    2.37
  -3  -7  21   19.32    2.63
  -3  -7  21   22.17    2.56
  -3  -7  22   37.78    3.09
   3  -7 -22   32.67    2.78
  -3  -7  22   33.43    2.78
   3  -7 -23   31.04    2.35
  -3  -7  23   40.34    3.02
  -3  -7  23   38.49    3.13
  -3  -7  23   33.23    2.52
  -3  -7  24   33.97    2.72
  -3  -7  24   35.67    2.61
  -3  -7  24   27.43    2.06
  -3  -7  25    5.04    1.24
  -3  -7  25    6.17    1.17
  -3  -7  26    7.82    1.04
  -3  -7  26    8.06    1.00
   3  -8  25    4.02    0.93
  -3   8  24    2.37    0.98
   3  -8  24    3.72    1.20
   3  -8  24   -0.33    0.37
   3  -8  23   36.45    2.28
   3  -8  23   40.82    2.80
   3  -8  22    4.00    1.35
   3  -8  22    4.61    1.76
  -3  -8 -21   25.97    3.48
   3  -8  21   28.87    2.65
  -3  -8 -20   84.16    5.72
   3  -8  20   80.29    4.28
   3  -8  19   39.47    3.26
  -3  -8 -19   35.04    4.20
   3  -8  18   24.84    2.93
  -3  -8 -18   17.50    3.30
   3  -8  18   23.11    2.72
  -3  -8 -17   33.30    3.30
  -3  -8 -17   29.63    3.93
   3  -8  16  135.26    5.83
  -3  -8 -16   83.23    4.96
   3  -8  16  131.50    5.63
  -3  -8 -16   83.51    5.91
  -3  -8 -15   39.93    3.63
  -3  -8 -15   43.49    4.35
  -3  -8 -14  203.23   20.58
  -3  -8 -14  213.49    7.80
   3  -8  14  210.49   20.78
  -3  -8 -14  229.94    8.93
   3  -8  14  214.84    8.22
  -3  -8 -13   26.82    3.11
   3  -8  13   29.08    3.22
   3  -8  13   27.56    2.74
   3  -8  13   21.34    7.67
  -3  -8 -13   29.41    3.61
  -3  -8 -13   36.28    8.43
  -3  -8 -12   43.28    3.61
   3  -8  12   47.73    3.28
   3  -8  12   49.28   10.19
  -3  -8 -12   43.62   10.45
  -3  -8 -12   42.43    3.67
   3  -8  12   44.25    3.72
  -3  -8 -11   69.88   12.13
   3  -8  11   81.88   12.41
   3  -8  10  123.29   14.89
  -3  -8 -10  124.96   16.02
   3  -8   9    3.04    4.15
  -3  -8  -9    3.74    3.41
  -3  -8  -8  239.98   20.87
   3  -8   8  255.53   19.93
  -3  -8  -7   61.64   10.80
   3  -8   7   54.12    9.28
   3  -8   6   95.72   11.82
  -3  -8  -6   89.51   12.24
  -3  -8  -5   74.38   11.17
   3  -8   5   68.10    9.67
   3  -8   4   10.22    4.48
  -3  -8  -4    9.91    4.93
  -3  -8  -3   83.55   11.28
   3  -8   2    1.80    2.02
  -3  -8  -2    7.69    4.48
  -3  -8  -1   92.92   11.43
   3  -8   1  102.38    9.74
  -3  -8   0   67.38    9.59
   3  -8   0   51.32    7.48
  -3  -8   1   84.20   11.02
  -3  -8   1   86.75   10.82
   3  -8  -1   89.51    9.87
  -3  -8   2    8.39    4.61
  -3  -8   2    8.39    4.52
  -3  -8   3   84.86   10.28
  -3  -8   3   91.83   11.95
  -3  -8   4    9.95    5.13
  -3  -8   4    6.41    4.46
  -3  -8   5   41.73    8.63
  -3  -8   5   43.49    7.91
  -3  -8   6   96.01   11.39
  -3  -8   6   85.77   11.61
  -3  -8   7   57.77    9.76
  -3  -8   8  221.70   18.78
  -3  -8   9    6.13    4.85
  -3  -8  10  141.09   15.39
  -3  -8  11   60.27   10.24
  -3  -8  12   48.62    9.39
  -3  -8  12   40.56    3.50
  -3  -8  13   23.21    2.39
  -3  -8  13   18.17    5.93
   3  -8 -13   23.97    3.35
   3  -8 -14  203.62    8.09
  -3  -8  14  209.25    6.89
  -3  -8  14  179.32   17.76
  -3  -8  15   34.67    3.09
   3  -8 -15   38.12    3.87
   3  -8 -16   85.73    5.46
  -3  -8  16   82.31    4.65
  -3  -8  17   35.71    3.22
   3  -8 -17   39.97    3.93
  -3  -8  18   15.28    2.41
   3  -8 -18   19.17    2.98
  -3  -8  19   37.21    3.24
  -3  -8  19   27.67    2.72
   3  -8 -19   36.73    3.70
   3  -8 -20   81.68    4.85
  -3  -8  20   80.88    4.11
  -3  -8  20   79.49    4.35
   3  -8 -21   33.47    3.09
  -3  -8  21   27.69    2.43
  -3  -8  21   31.32    2.80
  -3  -8  21   39.60    3.30
   3  -8 -22    2.06    1.24
  -3  -8  22    2.22    1.39
  -3  -8  22    1.46    0.91
  -3  -8  23   32.99    2.72
   3  -8 -23   28.80    2.13
  -3  -8  23   39.89    2.78
  -3  -8  24    2.74    1.17
  -3  -8  24    3.89    1.11
  -3  -8  25    4.91    1.00
  -3  -8  25    5.76    0.96
   3  -9  24   -0.26    0.78
  -3   9  24    0.20    0.67
   3  -9  23   -0.52    1.09
  -3   9  23   -0.13    1.00
   3  -9  22   20.00    2.11
   3  -9  21    6.48    1.70
   3  -9  20    8.98    2.09
  -3  -9 -19   19.11    3.24
   3  -9  19   20.71    2.70
   3  -9  18   18.00    2.80
  -3  -9 -18   11.67    2.89
  -3  -9 -18   16.82    2.39
  -3  -9 -17   29.04    3.02
   3  -9  17   27.91    3.26
  -3  -9 -17   29.13    3.78
  -3  -9 -16  114.35    6.56
  -3  -9 -16  122.94    6.04
  -3  -9 -15   71.29    4.87
   3  -9  15   80.14    4.87
  -3  -9 -15   65.29    5.11
  -3  -9 -14   33.95    3.67
  -3  -9 -14   38.47    4.00
   3  -9  14   39.99    4.00
   3  -9  14   40.45    3.59
   3  -9  13   16.85    6.52
  -3  -9 -13   16.45    3.02
   3  -9  13   12.91    2.06
   3  -9  13   16.67    2.76
  -3  -9 -13   17.28    2.85
  -3  -9 -12   91.09    5.43
  -3  -9 -12   88.33    5.37
   3  -9  12   80.14    5.09
   3  -9  12   84.29    4.30
   3  -9  12   76.68   12.61
  -3  -9 -11   42.47    3.96
  -3  -9 -11   43.65    3.67
   3  -9  11   30.23    2.67
   3  -9  11   47.32    3.87
   3  -9  11   30.82    7.61
  -3  -9 -11   46.06   10.02
   3  -9  10   99.22   13.85
  -3  -9 -10  103.51    5.65
   3  -9  10  110.31    5.54
  -3  -9 -10   91.07   14.22
   3  -9  10   99.18    4.48
   3  -9   9  144.35   16.21
  -3  -9  -9  127.78   16.74
  -3  -9  -8   17.50    6.74
   3  -9   8   14.91    5.30
   3  -9   7   70.25   10.69
  -3  -9  -7   77.42   12.72
  -3  -9  -6  145.37   16.39
  -3  -9  -5   98.55   13.39
  -3  -9  -4  298.06   22.32
  -3  -9  -3   13.76    5.72
  -3  -9  -2   99.03   12.72
  -3  -9  -1   40.23    8.61
   3  -9   1   26.95    5.48
  -3  -9   0   41.54    8.26
   3  -9   0   31.15    6.19
   3  -9  -1   20.87    5.48
  -3  -9   1   25.69    6.54
   3  -9  -2  107.53   12.00
  -3  -9   2  110.14   12.41
   3  -9  -3   13.78    5.19
  -3  -9   3    8.02    4.43
  -3  -9   4  259.11   18.91
  -3  -9   4  289.96   21.67
  -3  -9   5  112.33   12.19
  -3  -9   5  116.40   13.95
  -3  -9   6  153.37   14.58
  -3  -9   6  160.91   16.45
  -3  -9   7   68.97   11.41
  -3  -9   8   20.26    6.69
  -3  -9   9  123.65   14.85
  -3  -9  10   98.20   13.67
  -3  -9  10  105.77    5.02
   3  -9 -10   98.16    5.37
  -3  -9  10  103.59    5.15
  -3  -9  10  102.77    4.91
   3  -9 -11   47.47    3.98
  -3  -9  11   44.73    3.37
  -3  -9  11   49.47    9.65
  -3  -9  11   46.67    3.78
  -3  -9  11   35.39    3.20
  -3  -9  12   86.73   12.95
  -3  -9  12   79.44    4.35
  -3  -9  12   79.57    4.96
   3  -9 -12   76.25    5.11
  -3  -9  12   83.40    4.76
  -3  -9  13   19.43    3.00
  -3  -9  13   13.65    2.30
  -3  -9  13   15.26    5.41
   3  -9 -13   23.02    3.17
   3  -9 -14   41.78    4.09
  -3  -9  14   39.04    3.52
  -3  -9  14   39.95    3.20
   3  -9 -15   70.40    5.11
  -3  -9  15   57.17    4.24
  -3  -9  15   58.12    3.80
  -3  -9  16  113.31    5.22
   3  -9 -16  125.48    6.54
  -3  -9  16  122.26    5.93
  -3  -9  17   25.82    2.87
   3  -9 -17   27.02    3.59
  -3  -9  17   22.58    2.98
  -3  -9  18   19.91    2.76
  -3  -9  18   20.21    2.56
   3  -9 -18   21.02    3.15
   3  -9 -19   17.24    2.76
  -3  -9  19   10.67    2.26
  -3  -9  19   15.41    2.17
  -3  -9  20    2.63    1.54
   3  -9 -20    5.37    1.87
  -3  -9  20    4.96    1.65
  -3  -9  21    5.30    1.56
   3  -9 -21    3.59    1.56
  -3  -9  22   16.78    2.04
   3  -9 -22   14.69    1.87
  -3  -9  22   13.17    1.80
   3  -9 -23    0.13    0.61
  -3  -9  23   -0.20    0.91
  -3  -9  23   -0.20    1.02
  -3  -9  24    1.17    0.70
  -3  -9  24   -0.13    0.78
   3 -10  23   12.35    1.30
  -3  10  23   11.04    1.39
   3 -10  22   30.73    2.17
  -3  10  22   27.04    2.30
   3 -10  21   30.26    2.46
  -3  10  21   31.50    2.78
   3 -10  20    2.74    1.35
  -3 -10 -19    2.17    1.30
   3 -10  19    2.85    1.50
  -3 -10 -18   23.84    2.72
   3 -10  18   27.80    2.91
  -3 -10 -17   55.34    4.00
   3 -10  17   74.34    4.74
   3 -10  16    7.37    2.02
  -3 -10 -16    7.39    2.11
  -3 -10 -15   37.73    3.83
   3 -10  15   36.21    3.20
  -3 -10 -15   37.21    3.91
  -3 -10 -14  140.22    6.89
   3 -10  14  130.55    6.76
  -3 -10 -14  134.22    6.80
   3 -10  14  133.07    5.50
   3 -10  13   72.38    5.11
  -3 -10 -13   75.92    5.11
  -3 -10 -13   72.27    5.13
   3 -10  13   67.16    3.98
  -3 -10 -12   61.25    4.80
   3 -10  12   70.68    4.96
   3 -10  12   61.82    3.78
  -3 -10 -12   71.16    4.89
  -3 -10 -11   41.38    4.02
  -3 -10 -11   43.75    3.80
   3 -10  11   43.21    3.83
   3 -10  11   38.73    3.00
   3 -10  11   41.38    9.69
  -3 -10 -10   59.36    4.65
  -3 -10 -10   36.71   10.04
  -3 -10 -10   59.32    4.17
   3 -10  10   52.80    3.39
   3 -10  10   54.77   10.63
   3 -10  10   57.19    4.26
  -3 -10  -9   70.36   13.35
   3 -10   9   70.55    3.72
  -3 -10  -9   75.23    5.00
   3 -10   9   73.99    4.74
   3 -10   8    6.41    1.83
   3 -10   8    1.59    1.43
  -3 -10  -8    6.83    4.87
  -3 -10  -8    3.67    1.98
  -3 -10  -7   53.23    4.11
   3 -10   7   50.75    3.72
  -3 -10  -7   59.82   11.82
   3 -10   7   45.10    3.61
  -3 -10  -6   14.37    5.52
  -3 -10  -5   13.17    5.87
  -3 -10  -4   36.19    8.39
  -3 -10  -3  116.20   14.72
  -3 -10  -2   93.99   13.02
  -3 -10  -1  195.97   18.28
  -3 -10   0  113.85   13.72
   3 -10  -1  205.34   16.19
  -3 -10   1  170.89   16.28
  -3 -10   2   90.05   11.69
   3 -10  -2   81.97   10.98
  -3 -10   3  113.77   13.06
   3 -10  -3  116.42   13.17
  -3 -10   4   46.15    8.61
   3 -10  -4   37.97    8.37
   3 -10  -5   20.52    6.26
  -3 -10   5   23.97    6.46
   3 -10  -6   18.39    6.87
  -3 -10   7   45.60    3.56
   3 -10  -7   49.93    3.83
   3 -10  -7   56.23   10.82
  -3 -10   8    3.83    1.63
  -3 -10   8    5.17    1.43
   3 -10  -8    3.26    1.74
  -3 -10   8   -0.04    1.30
   3 -10  -8    3.22    4.28
  -3 -10   9   71.23    4.41
  -3 -10   9   62.03    4.22
   3 -10  -9   77.77   12.89
   3 -10  -9   64.40    4.54
  -3 -10   9   64.45    3.80
   3 -10 -10   44.71    4.02
  -3 -10  10   42.97    3.30
  -3 -10  10   46.04    3.65
   3 -10 -10   50.91   10.85
  -3 -10  10   43.34    3.70
  -3 -10  11   39.84    3.39
   3 -10 -11   39.08    3.74
  -3 -10  11   37.89    3.22
  -3 -10  11   40.73    3.63
  -3 -10  12   53.95    3.85
   3 -10 -12   51.69    4.35
  -3 -10  12   43.08    3.54
  -3 -10  13   69.14    4.37
   3 -10 -13   70.36    5.13
  -3 -10  13   72.95    4.96
  -3 -10  13   72.92    4.24
  -3 -10  14  139.11    5.54
  -3 -10  14  133.96    6.06
   3 -10 -14  141.98    7.09
   3 -10 -15   39.06    4.00
  -3 -10  15   36.76    2.98
  -3 -10  15   34.73    3.28
  -3 -10  16    6.59    1.91
  -3 -10  16    7.48    1.76
   3 -10 -16    5.50    2.33
  -3 -10  17   50.49    3.39
   3 -10 -17   56.17    4.46
  -3 -10  17   55.95    3.89
  -3 -10  18   21.54    2.52
  -3 -10  18   17.41    2.11
   3 -10 -18   21.89    3.00
  -3 -10  19    1.41    1.28
   3 -10 -19    2.63    1.74
  -3 -10  20    2.20    1.24
   3 -10 -20    3.28    1.56
  -3 -10  21   29.00    2.39
   3 -10 -21   32.99    2.67
  -3 -10  21   36.69    2.54
  -3 -10  22   23.84    1.96
   3 -10 -22   30.41    2.22
  -3 -10  22   30.32    2.04
  -3 -10  23   10.04    1.09
  -3 -10  23    7.72    1.11
   3 -11  22   33.91    1.74
  -3  11  22   31.78    2.11
   3 -11  21   34.26    2.11
  -3  11  21   32.54    2.46
  -3  11  20    8.24    1.76
   3 -11  20    8.59    1.48
  -3 -11 -19   45.12    2.91
   3 -11  19   51.23    3.22
  -3  11  19   47.30    3.54
  -3 -11 -18   38.58    3.06
   3 -11  18   44.10    3.04
  -3 -11 -17   56.19    3.89
   3 -11  17   56.97    3.65
  -3 -11 -16   19.34    2.87
   3 -11  16   21.45    2.43
   3 -11  15   31.54    2.80
  -3 -11 -15   35.13    3.67
   3 -11  14   45.88    4.30
  -3 -11 -14   44.38    4.20
   3 -11  14   41.62    3.15
  -3 -11 -13   89.33    5.72
   3 -11  13   92.07    5.67
   3 -11  13   94.75    4.52
  -3 -11 -12  154.76    7.48
   3 -11  12  148.54    5.54
   3 -11  12  166.87    7.43
   3 -11  11   81.51    4.13
  -3 -11 -11   82.81    5.65
   3 -11  11   81.57    5.28
  -3 -11 -10  239.09    9.22
   3 -11  10  254.50    6.93
   3 -11  10  256.33    8.96
  -3 -11  -9  421.30   11.85
   3 -11   9  433.63   11.52
  -3 -11  -8   14.04    2.70
   3 -11   8   12.69    2.46
   3 -11   8   14.63    2.30
   3 -11   8   10.69    1.80
  -3 -11  -7   17.13    2.76
   3 -11   7   14.93    2.43
   3 -11   7   20.04    2.70
  -3  11   7   17.61    2.50
   3 -11   6   47.01    3.85
  -3  11   6   44.75    3.56
   3 -11   6   38.02    3.35
  -3 -11  -6   39.06    3.74
  -3 -11  -6   34.04    9.72
  -3 -11  -5  208.36    7.78
   3 -11   5  210.75    7.67
   3 -11   5  203.95    7.28
  -3 -11  -5  202.56   20.80
  -3  11   5  202.99    7.06
   3 -11   4  178.17    7.04
  -3 -11  -4  175.39    7.00
  -3 -11  -4  183.45   19.50
   3 -11   4  168.45    6.48
  -3  11   4  162.02    6.15
  -3 -11  -3   88.83    4.56
  -3 -11  -3   93.70    5.13
   3 -11   3   99.59    5.28
  -3 -11  -3   93.72   13.67
   3 -11   3   91.27    4.78
  -3 -11  -2   98.57    5.11
   3 -11   2  100.88    4.93
  -3 -11  -2  103.03    5.39
  -3 -11  -2  110.55   14.85
  -3 -11  -1  301.50    8.59
  -3 -11  -1  323.71   24.00
   3 -11   1  318.99    8.69
  -3 -11  -1  304.24    9.11
  -3 -11   0   25.60    2.80
  -3 -11   0   15.00    2.17
  -3 -11   0   17.63    2.48
  -3 -11   0   19.82    7.43
   3 -11   0   16.67    2.24
  -3 -11   1  290.52    8.91
  -3 -11   1  330.38    9.22
  -3 -11   1  294.78    8.32
  -3 -11   1  314.54   22.95
   3 -11  -1  311.65    8.56
  -3 -11   2  112.13    5.63
  -3 -11   2   95.68    4.74
  -3 -11   2   94.57   12.74
  -3 -11   2  104.29    5.41
   3 -11  -2   91.40   11.87
  -3 -11   3   84.49    5.00
  -3 -11   3   61.99    3.98
  -3 -11   3   70.75   10.72
  -3 -11   3   83.05    4.43
   3 -11  -3   69.95   11.00
   3 -11  -4  150.11    5.89
   3 -11  -4  158.54   16.71
  -3 -11   4  150.87    6.65
  -3 -11   4  156.85    6.15
  -3 -11   4  148.52   15.13
   3 -11  -5  195.14   18.93
  -3 -11   5  179.02    7.24
  -3 -11   5  142.76    5.91
   3 -11  -5  190.06    6.93
  -3 -11   5  171.41   16.13
  -3 -11   6   44.30    3.87
   3 -11  -6   49.64    3.85
  -3 -11   6   52.51    3.83
   3 -11  -7   31.04    3.15
  -3 -11   7   26.82    3.11
  -3 -11   7   25.43    2.85
   3 -11  -7   29.17    2.85
   3 -11  -7   28.39    8.11
  -3 -11   8   10.63    2.35
  -3 -11   8    9.13    2.09
   3 -11  -8    7.63    1.89
   3 -11  -8   10.37    2.30
  -3 -11   8   10.26    1.85
   3 -11  -9  420.89   11.35
  -3 -11   9  445.50   11.28
  -3 -11   9  455.23   11.11
  -3 -11   9  457.06    9.78
  -3 -11  10  246.94    8.41
   3 -11 -10  245.16    8.93
  -3 -11  10  249.85    8.46
  -3 -11  10  262.16    7.59
  -3 -11  11  101.18    4.91
   3 -11 -11   93.05    5.74
  -3 -11  11   90.38    5.33
  -3 -11  11   96.35    5.35
   3 -11 -12  145.54    7.09
  -3 -11  12  161.21    7.09
  -3 -11  12  142.59    5.87
  -3 -11  12  153.35    6.39
  -3 -11  13  103.98    5.11
   3 -11 -13   97.96    5.93
  -3 -11  13   97.40    5.61
  -3 -11  13  108.96    5.13
  -3 -11  14   46.12    3.35
   3 -11 -14   43.73    4.22
  -3 -11  14   36.52    3.17
   3 -11 -15   34.67    3.76
  -3 -11  15   28.52    2.80
   3 -11 -16   19.26    3.04
  -3 -11  16   20.15    2.35
   3 -11 -17   58.03    4.37
  -3 -11  17   47.51    3.30
   3 -11 -18   42.38    3.59
  -3 -11  18   38.73    2.85
   3 -11 -19   51.60    3.65
  -3 -11  19   52.06    2.98
   3 -11 -20    6.09    1.63
  -3 -11  20    7.54    1.28
  -3 -11  20    4.43    1.15
   3 -11 -21   29.91    2.24
  -3 -11  21   29.78    1.83
   3 -11 -22   27.28    1.72
  -3 -11  22   23.11    1.33
  -3  12  21    2.15    0.89
   3 -12  20    2.52    0.76
  -3  12  20    4.37    1.22
  -3 -12 -19   22.34    1.91
   3 -12  19   21.67    1.80
  -3  12  19   21.74    2.26
  -3 -12 -18    4.39    1.46
   3 -12  18    1.22    1.04
  -3  12  18    1.54    1.33
   3 -12  17    5.48    1.20
   3 -12  17    6.00    1.28
  -3 -12 -17    5.22    1.70
  -3  12  17    6.85    1.89
  -3 -12 -16   38.93    3.41
  -3  12  16   32.86    3.28
   3 -12  16   34.21    2.65
   3 -12  16   33.19    2.48
   3 -12  15    5.04    1.35
  -3 -12 -15    8.46    2.37
  -3  12  15    6.02    2.00
   3 -12  14   16.76    2.00
  -3 -12 -14   18.32    3.00
   3 -12  14   15.35    2.67
  -3  12  14   13.11    2.43
   3 -12  13   48.95    3.17
  -3  12  13   43.84    3.93
  -3 -12 -13   52.36    4.41
   3 -12  13   44.91    4.04
  -3 -12 -12   18.71    3.22
   3 -12  12   17.24    2.91
  -3  12  12   16.63    2.76
  -3 -12 -11   34.76    3.91
   3 -12  11   35.17    3.72
  -3  12  11   33.47    3.54
  -3 -12 -10   86.44    5.67
   3 -12  10   89.38    5.50
  -3  12  10   85.64    5.24
  -3 -12  -9  115.13    6.54
   3 -12   9  120.16    5.17
  -3  12   9  114.55    5.96
   3 -12   9  122.76    6.37
  -3 -12  -8   30.30    3.67
   3 -12   8   37.02    3.78
  -3  12   8   33.39    3.41
   3 -12   8   29.73    2.85
   3 -12   7  109.50    5.96
  -3 -12  -7  108.16    6.24
  -3  12   7  106.42    5.52
   3 -12   7   98.92    5.11
   3 -12   7   98.29    5.39
   3 -12   6   12.35    2.46
  -3  12   6   12.28    2.15
   3 -12   6    8.76    1.96
   3 -12   6    8.69    1.98
  -3 -12  -6   10.56    2.56
  -3 -12  -5   21.69    3.09
   3 -12   5   20.43    2.70
   3 -12   5   20.56    2.87
   3 -12   5   17.17    2.52
  -3  12   5   21.93    2.65
  -3 -12  -4  329.34    9.98
   3 -12   4  342.32    9.54
   3 -12   4  335.97    9.95
  -3  12   4  329.19    8.85
  -3 -12  -3  121.70    6.04
  -3 -12  -3  107.72   15.22
   3 -12   3  124.24    6.15
  -3 -12  -3  121.63    5.54
   3 -12   3  124.72    5.80
  -3 -12  -2   78.94    4.65
  -3 -12  -2   75.51    4.74
   3 -12   2   79.99    4.65
   3 -12   2   76.60    4.89
  -3 -12  -2   68.32   11.89
  -3 -12  -1   31.76    3.20
   3 -12   1   27.23    2.89
  -3 -12  -1   33.17    3.30
  -3 -12   0    0.91    1.65
   3 -12   0    1.48    1.41
  -3 -12   0    0.78    1.43
  -3 -12   0    2.20    1.70
  -3 -12   0    1.41    4.37
   3 -12  -1   36.45    3.24
  -3 -12   1   35.49    3.39
  -3 -12   1   33.28    3.26
  -3 -12   1   38.02    3.26
  -3 -12   1   34.34    8.37
   3 -12  -2   79.23    4.69
  -3 -12   2   75.62    4.96
  -3 -12   2   69.95    4.43
  -3 -12   2   82.90    4.69
  -3 -12   3  104.09    5.89
  -3 -12   3  114.07    5.52
  -3 -12   3  108.81   13.58
  -3 -12   4  322.71   10.04
   3 -12  -4  323.54    8.89
  -3 -12   4  329.41    9.22
  -3 -12   5   21.78    3.09
   3 -12  -5   23.28    2.74
  -3 -12   5   23.11    2.76
   3 -12  -5   22.71    2.89
  -3 -12   6    9.32    2.48
   3 -12  -6    5.65    1.85
   3 -12  -6   10.82    2.24
  -3 -12   6   13.19    2.35
  -3 -12   7   93.62    5.56
   3 -12  -7   99.66    5.09
   3 -12  -7   98.18    5.48
  -3 -12   7  104.72    5.48
  -3 -12   8   36.65    3.78
  -3 -12   8   38.08    3.50
   3 -12  -8   35.84    3.70
   3 -12  -8   41.56    3.37
  -3 -12   9  116.57    6.13
   3 -12  -9  124.55    5.39
   3 -12  -9  117.87    6.24
  -3 -12   9  119.66    5.89
  -3 -12  10  100.40    5.56
  -3 -12  10   88.53    5.22
   3 -12 -10   92.12    5.61
  -3 -12  11   41.36    3.76
   3 -12 -11   36.10    3.78
  -3 -12  11   41.86    3.15
  -3 -12  11   40.93    3.74
  -3 -12  12   13.13    2.35
   3 -12 -12   12.74    2.80
  -3 -12  12   14.48    2.67
  -3 -12  12   12.85    2.06
  -3 -12  13   48.95    3.63
  -3 -12  13   50.58    3.35
   3 -12 -13   48.86    4.24
  -3 -12  14   14.50    2.11
  -3 -12  14   13.04    1.87
   3 -12 -14   15.58    2.85
   3 -12 -15    7.82    2.50
  -3 -12  15    9.76    1.63
   3 -12 -16   33.95    3.52
  -3 -12  16   34.89    2.54
  -3 -12  17    6.83    1.39
   3 -12 -17    5.11    2.02
  -3 -12  18    1.17    0.80
   3 -12 -18    1.91    1.63
  -3 -12  18    2.24    0.98
   3 -12 -19   24.15    2.35
  -3 -12  19   18.11    1.50
  -3 -12  20   -0.91    0.37
  -3 -12  20    0.78    0.43
   3 -12 -21    1.61    0.83
  -3  13  20   14.04    1.22
  -3 -13 -19   -0.83    0.37
  -3  13  19    2.56    1.00
  -3  13  18   19.84    2.00
  -3 -13 -18   19.89    1.87
   3 -13  17    2.65    0.83
  -3 -13 -17    3.65    1.39
  -3  13  17    3.70    1.39
   3 -13  16    0.76    0.93
  -3 -13 -16    0.24    1.46
  -3  13  16    0.85    1.35
   3 -13  15   11.98    1.78
  -3 -13 -15   16.30    2.56
  -3  13  15   11.78    2.04
   3 -13  14  155.89    5.74
  -3  13  14  151.09    6.17
  -3 -13 -14  160.74    6.72
  -3 -13 -13   57.51    4.56
  -3  13  13   50.45    3.89
   3 -13  13   61.03    4.46
   3 -13  12   12.26    2.52
  -3 -13 -12   13.69    2.93
  -3  13  12   12.45    2.33
  -3  13  11   14.89    2.48
  -3 -13 -11   15.56    3.04
   3 -13  11   13.69    2.72
   3 -13  10   23.06    3.20
  -3 -13 -10   25.17    3.56
  -3  13  10   22.69    2.87
   3 -13   9  104.66    5.85
   3 -13   9  109.81    4.91
  -3 -13  -9   97.09    6.04
  -3  13   9  101.14    5.37
   3 -13   8   14.41    2.70
  -3 -13  -8   13.26    2.89
   3 -13   8   15.69    2.33
  -3  13   8   15.30    2.41
  -3 -13  -7   21.61    3.15
   3 -13   7   32.95    3.65
  -3  13   7   25.13    2.89
   3 -13   7   22.24    2.63
  -3 -13  -6  103.77    6.09
   3 -13   6  101.33    5.50
  -3  13   6   94.16    5.02
   3 -13   6  105.38    5.46
   3 -13   6   96.83    5.69
   3 -13   5   44.49    3.96
  -3 -13  -5   46.82    4.20
   3 -13   5   43.25    3.74
   3 -13   5   45.49    3.83
  -3 -13  -4   50.34    4.30
   3 -13   4   53.67    4.00
   3 -13   4   52.75    4.26
   3 -13   4   50.43    4.09
   3 -13   3   88.92    5.39
   3 -13   3   86.92    5.22
   3 -13   3   87.68    5.00
  -3 -13  -3   90.75    5.41
  -3 -13  -2   18.84    2.67
   3 -13   2   13.63    2.70
  -3 -13  -2   16.19    2.70
   3 -13   2   17.45    2.72
   3 -13   2   12.04    2.24
   3 -13   1   21.56    2.91
  -3 -13  -1   27.04    3.22
   3 -13   1   29.08    3.33
  -3 -13  -1   22.95    2.96
  -3 -13  -1   25.06    2.87
   3 -13   1   22.87    2.80
  -3 -13   0  152.89    6.80
  -3 -13   0  140.24    6.37
  -3 -13   0  156.95    6.46
   3 -13   0  130.76    6.46
   3 -13   0  143.41    6.28
  -3 -13   1   22.02    2.89
   3 -13  -1   24.67    2.87
  -3 -13   1   25.13    3.28
  -3 -13   1   29.37    3.09
   3 -13  -1   22.63    3.15
  -3 -13   2   18.93    3.06
  -3 -13   2   17.93    2.56
   3 -13  -2   15.43    2.65
   3 -13  -2   18.32    2.54
  -3 -13   3   85.38    5.48
   3 -13  -3   81.70    5.19
  -3 -13   3   81.75    4.85
   3 -13  -3   82.97    4.98
  -3 -13   4   53.47    4.52
   3 -13  -4   54.86    4.26
  -3 -13   4   54.86    4.04
   3 -13  -4   51.08    3.65
   3 -13  -4   53.14    4.02
   3 -13  -5   51.34    3.93
  -3 -13   5   57.27    4.13
   3 -13  -5   55.40    4.24
  -3 -13   5   50.60    4.46
  -3 -13   6   90.14    5.72
   3 -13  -6  104.77    5.46
   3 -13  -6  102.35    5.37
  -3 -13   6  101.44    5.37
   3 -13  -7   33.39    3.41
  -3 -13   7   28.23    3.43
   3 -13  -7   29.15    3.04
  -3 -13   7   32.06    3.24
  -3 -13   8   11.13    2.65
   3 -13  -8   11.78    2.50
   3 -13  -8   11.04    2.09
  -3 -13   8   11.78    2.33
   3 -13  -9  100.16    5.69
  -3 -13   9  107.33    5.56
   3 -13  -9  111.05    5.06
  -3 -13   9  109.46    5.96
  -3 -13  10   28.54    3.15
  -3 -13  10   29.32    3.30
   3 -13 -10   27.04    3.22
  -3 -13  11   12.06    2.30
   3 -13 -11   14.91    2.70
  -3 -13  11   12.00    2.39
  -3 -13  12   10.28    2.20
   3 -13 -12   13.52    2.76
  -3 -13  12   14.17    2.39
  -3 -13  13   56.19    3.70
   3 -13 -13   61.49    4.54
   3 -13 -14  163.50    6.76
   3 -13 -15   15.24    2.59
   3 -13 -16    0.76    1.63
   3 -13 -17    3.72    1.59
   3 -13 -18   21.08    2.20
   3 -13 -19    3.65    1.13
   3 -13 -20   13.91    1.28
  -3  14  18    9.26    1.00
  -3  14  17    4.63    1.02
  -3 -14 -17    4.15    1.13
   3 -14  16    2.61    0.91
  -3 -14 -16    1.54    1.24
  -3  14  16    0.43    0.91
   3 -14  15   54.43    2.87
  -3 -14 -15   58.32    3.52
  -3  14  15   52.51    3.09
   3 -14  14    8.89    1.65
  -3  14  14    9.93    1.72
  -3 -14 -14    8.63    2.11
   3 -14  13   22.19    2.48
  -3  14  13   21.04    2.41
  -3 -14 -13   22.63    2.85
  -3  14  12   28.23    2.76
   3 -14  12   30.73    3.17
   3 -14  12   33.86    3.04
  -3 -14 -12   31.23    3.37
   3 -14  11   54.19    3.87
  -3 -14 -11   51.75    4.28
   3 -14  11   49.62    3.91
  -3  14  11   46.30    3.46
  -3  14  10   17.48    2.30
  -3 -14 -10   17.91    3.06
   3 -14  10   19.52    2.91
   3 -14   9   31.23    3.43
   3 -14   9   30.21    2.59
  -3 -14  -9   27.13    3.59
  -3  14   9   29.34    2.93
   3 -14   8   13.56    2.56
   3 -14   8   13.72    2.06
  -3 -14  -8   11.56    2.59
  -3  14   8   12.89    2.04
   3 -14   7   26.65    2.89
   3 -14   7   20.37    3.06
  -3  14   7   20.87    2.46
  -3 -14  -7   20.67    3.11
   3 -14   6    1.17    1.85
   3 -14   6   -0.22    1.52
  -3 -14  -6   -1.00    2.09
   3 -14   5   69.99    4.91
   3 -14   5   73.05    4.67
  -3 -14  -5   76.25    5.15
   3 -14   5   71.88    4.61
   3 -14   4   37.78    3.61
  -3 -14  -4   41.56    3.89
   3 -14   4   46.04    4.00
   3 -14   4   36.10    3.41
   3 -14   3   76.94    4.69
   3 -14   3   70.53    4.83
   3 -14   3   73.34    4.98
  -3 -14  -3   76.92    4.63
  -3 -14  -3   75.38    5.00
   3 -14   2   18.71    3.04
   3 -14   2   20.00    3.02
  -3 -14  -2   17.04    2.50
   3 -14   2   18.37    2.63
  -3 -14  -2   16.28    2.70
  -3 -14  -1   49.82    3.93
  -3 -14  -1   38.78    3.61
   3 -14   1   44.82    4.02
   3 -14   1   40.17    3.89
  -3 -14  -1   44.84    3.65
   3 -14   1   42.10    3.63
  -3 -14   0   52.69    4.22
  -3 -14   0   45.67    3.80
  -3 -14   0   53.95    3.96
   3 -14   0   45.23    4.17
   3 -14   0   51.08    4.26
   3 -14   0   45.80    3.70
   3 -14  -1   36.19    3.20
   3 -14  -1   35.39    3.28
  -3 -14   1   36.99    3.50
   3 -14  -1   36.08    3.78
  -3 -14   1   34.49    3.61
   3 -14  -2   17.24    2.35
  -3 -14   2   18.15    3.02
  -3 -14   2   17.15    2.52
   3 -14  -2   15.11    2.65
   3 -14  -2   17.61    2.56
  -3 -14   3   80.79    5.26
  -3 -14   3   82.79    4.87
   3 -14  -3   89.01    4.98
   3 -14  -3   84.14    5.17
  -3 -14   4   42.95    4.09
   3 -14  -4   46.88    3.39
   3 -14  -4   41.19    3.80
  -3 -14   4   51.14    3.89
   3 -14  -4   40.82    3.54
  -3 -14   5   62.62    4.87
   3 -14  -5   73.81    4.61
  -3 -14   5   69.32    4.43
   3 -14  -5   71.58    4.35
   3 -14  -5   70.58    4.63
  -3 -14   6    0.09    1.87
   3 -14  -6    0.50    1.67
  -3 -14   6   -0.85    1.61
   3 -14  -6    0.93    1.41
   3 -14  -6    0.65    1.59
  -3 -14   7   19.52    2.70
  -3 -14   7   23.28    3.24
   3 -14  -7   25.04    2.89
   3 -14  -7   27.37    2.89
   3 -14  -7   27.58    3.00
  -3 -14   8   13.72    2.70
  -3 -14   8   12.93    2.26
   3 -14  -8   18.15    2.43
   3 -14  -8   14.43    2.37
   3 -14  -8   14.22    2.30
   3 -14  -9   31.56    3.28
  -3 -14   9   31.06    3.17
   3 -14  -9   28.76    2.61
  -3 -14   9   33.54    3.46
   3 -14 -10   26.17    3.09
  -3 -14  10   26.24    2.93
  -3 -14  10   29.08    3.17
   3 -14 -11   46.08    3.89
  -3 -14  11   42.86    3.48
  -3 -14  11   52.60    3.80
   3 -14 -12   29.58    3.13
   3 -14 -13   22.56    2.74
   3 -14 -14    9.37    1.98
   3 -14 -15   45.43    3.30
   3 -14 -16    0.67    1.26
   3 -14 -17    2.87    1.24
   3 -14 -17    2.80    0.78
   3 -14 -18   12.61    1.41
  -3 -15 -16   21.04    1.59
   3 -15  15   -0.24    0.63
  -3  15  15    0.00    0.52
  -3 -15 -14   33.49    2.61
  -3  15  14   28.08    1.89
   3 -15  14   30.95    2.11
   3 -15  13   50.99    2.91
  -3  15  13   43.75    2.50
  -3 -15 -13   51.51    3.43
   3 -15  12   40.99    2.87
  -3 -15 -12   42.43    3.37
  -3  15  12   33.32    2.39
   3 -15  11    2.87    1.50
   3 -15  11    3.65    1.67
  -3  15  11    1.48    0.93
  -3 -15 -11    2.11    1.78
   3 -15  10   74.60    4.24
  -3 -15 -10   73.73    4.63
  -3  15  10   66.29    3.43
   3 -15  10   69.71    4.26
   3 -15   9  121.20    5.50
  -3 -15  -9  115.05    5.69
   3 -15   9  109.46    5.30
   3 -15   9  114.76    4.33
  -3  15   9   98.90    4.20
   3 -15   8    3.41    1.85
  -3 -15  -8    2.72    1.26
   3 -15   8    2.50    1.28
  -3 -15  -8    3.22    2.00
   3 -15   8    2.52    1.85
  -3 -15  -7   21.15    3.02
   3 -15   7   20.11    2.85
   3 -15   7   20.00    2.37
   3 -15   7   22.89    2.89
  -3 -15  -7   21.41    2.46
   3 -15   6   21.04    2.80
  -3 -15  -6   23.80    3.17
  -3 -15  -6   19.13    2.41
   3 -15   6   25.43    3.02
   3 -15   6   21.67    2.59
   3 -15   5   67.79    4.50
  -3 -15  -5   73.45    4.87
  -3 -15  -5   69.64    4.15
   3 -15   5   71.92    4.43
   3 -15   5   70.97    4.69
   3 -15   4   45.45    3.78
  -3 -15  -4   37.56    3.20
  -3 -15  -4   41.02    3.67
   3 -15   4   45.25    3.54
   3 -15   4   37.67    3.59
   3 -15   4   44.86    3.76
   3 -15   3   22.71    2.91
  -3 -15  -3   22.69    2.89
   3 -15   3   23.00    3.11
   3 -15   3   22.43    2.98
  -3 -15  -3   22.52    2.65
   3 -15   3   22.56    2.67
  -3 -15  -2  236.83    7.89
   3 -15   2  234.29    8.24
   3 -15   2  222.94    8.15
   3 -15   2  241.66    7.80
  -3 -15  -2  240.33    7.67
   3 -15   2  250.98    7.87
   3 -15   1    2.11    1.59
   3 -15   1    2.56    2.06
   3 -15   1    2.93    2.00
  -3 -15  -1    5.02    1.72
   3 -15   1    1.70    1.43
   3 -15   0   17.93    2.33
   3 -15   0   18.93    2.52
  -3 -15   0   17.39    2.46
   3 -15   0   15.89    2.61
   3 -15   0   17.52    2.96
   3 -15  -1    6.43    1.70
  -3 -15   1    4.78    1.74
   3 -15  -1    5.33    1.74
   3 -15  -1    4.30    2.09
   3 -15  -1    4.11    1.98
  -3 -15   2  248.51    8.32
   3 -15  -2  264.00    8.02
   3 -15  -2  231.55    8.41
   3 -15  -2  258.11    8.61
  -3 -15   2  234.46    7.61
  -3 -15   3   20.71    2.63
   3 -15  -3   16.89    2.37
   3 -15  -3   19.82    2.89
  -3 -15   3   20.41    3.09
  -3 -15   4   44.62    4.02
  -3 -15   4   39.67    3.30
   3 -15  -4   48.47    3.96
   3 -15  -4   51.14    3.67
  -3 -15   5   60.82    4.52
   3 -15  -5   63.60    3.74
  -3 -15   5   64.21    4.09
   3 -15  -5   65.14    4.04
   3 -15  -5   63.75    4.24
  -3 -15   6   17.54    2.89
   3 -15  -6   20.48    2.39
   3 -15  -6   21.13    2.65
  -3 -15   6   18.45    2.43
   3 -15  -6   16.89    2.35
  -3 -15   7   26.56    3.24
   3 -15  -7   24.89    2.61
  -3 -15   7   30.21    2.93
   3 -15  -7   25.26    2.63
   3 -15  -7   24.76    2.59
   3 -15  -8    1.89    1.43
   3 -15  -8    1.56    1.41
  -3 -15   8    3.91    1.63
  -3 -15   8    1.52    1.87
   3 -15  -8    1.35    1.22
   3 -15  -9  104.18    4.89
  -3 -15   9   98.12    4.67
   3 -15  -9   98.51    4.54
   3 -15 -10   70.92    4.09
  -3 -15  10   72.31    4.00
   3 -15 -10   73.95    3.91
   3 -15 -11    0.63    1.37
   3 -15 -11    2.28    1.13
   3 -15 -12   39.73    3.00
   3 -15 -12   37.02    2.59
   3 -15 -13   50.21    2.72
   3 -15 -13   49.60    3.20
   3 -15 -14   29.58    2.43
   3 -15 -14   25.93    1.83
   3 -15 -15    1.22    0.50
   3 -15 -15    1.17    1.09
   3 -15 -16   26.82    1.85
   3 -16  13   21.32    1.61
  -3 -16 -13   19.61    1.76
   3 -16  12   47.49    2.54
  -3 -16 -12   51.08    2.93
   3 -16  11    1.83    1.13
  -3 -16 -11    2.48    1.37
  -3 -16 -10    5.48    1.96
   3 -16  10    1.85    1.37
   3 -16  10    1.52    1.15
   3 -16   9   11.37    1.91
   3 -16   9   10.32    1.87
  -3 -16  -9   11.37    2.15
   3 -16   8   27.78    2.67
  -3 -16  -8   20.37    1.83
   3 -16   8   30.10    2.78
  -3 -16  -8   27.76    2.78
  -3 -16  -7    6.91    1.87
   3 -16   7    4.63    1.67
   3 -16   7    6.24    1.87
  -3 -16  -7    4.87    1.26
   3 -16   6   28.50    2.83
  -3 -16  -6   27.65    2.91
   3 -16   6   29.32    2.61
   3 -16   6   28.08    2.85
  -3 -16  -6   22.93    2.22
   3 -16   5    7.09    1.98
   3 -16   5    9.48    2.02
  -3 -16  -5    8.91    1.93
  -3 -16  -5    8.19    1.63
   3 -16   5   13.22    2.06
   3 -16   4   19.78    2.48
   3 -16   4   18.84    2.50
   3 -16   4   22.76    2.72
  -3 -16  -4   17.39    2.06
   3 -16   3   75.12    4.15
  -3 -16  -3   77.62    4.04
   3 -16   3   80.90    4.54
   3 -16   3   79.77    4.61
   3 -16   2    2.24    1.41
   3 -16   2    2.24    1.78
   3 -16   2    3.48    1.87
   3 -16   2    3.04    1.41
  -3 -16  -2    4.61    1.50
   3 -16   1   20.34    2.28
  -3 -16  -1   18.54    2.22
   3 -16   1   20.21    2.72
   3 -16   1   17.30    2.65
   3 -16   1   19.98    2.35
   3 -16   0   21.74    2.22
   3 -16   0   22.54    3.00
  -3 -16   0   24.58    2.56
   3 -16   0   24.26    2.93
   3 -16   0   20.45    2.28
   3 -16  -1   20.82    2.06
   3 -16  -1   16.15    2.50
   3 -16  -1   18.80    2.78
  -3 -16   1   19.95    2.41
   3 -16  -1   20.00    2.28
  -3 -16   2    3.56    1.48
   3 -16  -2    1.20    1.78
   3 -16  -2    2.76    1.28
   3 -16  -2    3.74    1.89
   3 -16  -3   81.92    4.13
   3 -16  -3   77.64    4.65
   3 -16  -3   78.77    4.54
  -3 -16   3   76.73    4.02
  -3 -16   4   14.85    2.04
   3 -16  -4   15.19    2.30
   3 -16  -4   14.30    1.93
   3 -16  -4   16.93    2.48
   3 -16  -5   13.72    2.17
   3 -16  -5   12.69    1.83
  -3 -16   5    9.28    1.76
   3 -16  -5    9.52    2.09
  -3 -16   6   26.56    2.46
   3 -16  -6   27.21    2.54
   3 -16  -6   27.15    2.43
   3 -16  -6   28.17    2.96
   3 -16  -7    6.22    1.39
  -3 -16   7    7.22    1.65
   3 -16  -7    5.83    1.37
   3 -16  -8   26.82    2.26
   3 -16  -8   27.23    2.24
  -3 -16   8   31.10    2.52
   3 -16  -9   11.43    1.52
   3 -16  -9    8.91    1.54
   3 -16 -10    4.41    1.09
   3 -16 -10    3.87    1.24
   3 -16 -11    2.61    0.83
   3 -16 -11    4.02    1.20
   3 -16 -12   41.58    2.41
   3 -16 -12   -0.46    0.35
   3 -16 -13   18.93    1.59
   3 -17  11    2.00    0.72
   3 -17  10    8.17    1.17
   3 -17   9   20.04    1.76
   3 -17   9   17.82    1.76
   3 -17   8   24.97    2.02
   3 -17   8   23.34    2.06
   3 -17   7   20.82    1.96
   3 -17   7   17.82    1.91
   3 -17   6   35.36    2.50
   3 -17   6   33.60    2.52
   3 -17   5    7.69    1.46
   3 -17   5    9.09    1.67
   3 -17   4    8.06    1.54
   3 -17   4    9.52    1.78
   3 -17   3   37.08    2.54
   3 -17   3   34.41    2.76
  -3 -17  -3   33.73    2.24
   3 -17   2   54.84    2.93
   3 -17   2   58.53    3.56
  -3 -17  -2   53.67    2.85
   3 -17   1   63.08    2.96
   3 -17   1   60.93    3.65
  -3 -17  -1   56.73    2.96
   3 -17   0   61.14    3.63
  -3 -17   0   51.69    2.85
   3 -17  -1   67.27    3.20
   3 -17  -1   63.88    3.72
  -3 -17   1   55.93    3.00
   3 -17  -2   61.49    3.63
  -3 -17   2   54.51    2.93
   3 -17  -2   55.43    2.87
   3 -17  -3   37.71    2.93
   3 -17  -3   40.52    2.43
  -3 -17   3   33.99    2.37
   3 -17  -4   10.48    1.85
   3 -17  -4    9.48    1.35
  -3 -17   4    8.13    1.41
  -3 -17   5    5.89    1.22
   3 -17  -5    6.37    1.50
   3 -17  -5    5.65    1.11
   3 -17  -6   30.54    1.93
  -3 -17   6   30.10    2.15
   3 -17  -6   32.41    2.59
   3 -17  -7   21.37    2.09
   3 -17  -7    7.46    0.89
   3 -17  -8   -0.07    0.26
   3 -17  -8   24.00    2.11
   3 -17  -9   17.93    1.80
   3 -17 -10    6.43    1.17
   3 -17 -11    1.35    0.72
   3 -18   6    8.35    1.04
   3 -18   5    2.98    0.89
   3 -18   4    3.87    0.98
   3 -18   3   11.22    1.37
   3 -18   2   -0.09    0.85
   3 -18   1    4.17    1.11
   3 -18   0   11.19    1.43
   3 -18  -1    8.17    1.35
   3 -18  -2    0.59    0.89
   3 -18  -3   11.67    1.39
   3 -18  -4    2.41    0.91
   3 -18  -5    2.87    0.87
   3 -18  -6   11.69    1.20
  -4   0   0  478.34   14.74
  -4   0   0  519.62   17.11
  -4   0  -1  187.58   10.45
  -4   0   1  183.41    9.67
  -4   0  -1  181.65    8.50
  -4   0   1  174.84   10.15
  -4   0   2   24.08    4.61
  -4   0  -2   21.54    3.00
  -4   0   2   22.17    4.26
  -4   0  -2   22.19    4.30
  -4   0  -3  115.11    8.50
  -4   0  -3  110.81    5.50
  -4   0   3  114.05    8.09
  -4   0   3  120.42    9.35
  -4   0   4  766.01   22.32
  -4   0  -4  739.28   11.82
  -4   0   4  771.42   19.89
  -4   0  -4  755.67   15.30
  -4   0  -4  750.08   21.47
  -4   0   5    3.30    3.06
  -4   0  -5    4.69    0.76
  -4   0   5    3.43    2.13
  -4   0  -5    7.15    1.98
  -4   0  -5    9.19    3.65
  -4   0   6  578.50   20.95
  -4   0  -6  591.97   21.00
  -4   0  -6  595.76   19.76
  -4   0  -6  590.10   12.85
  -4   0   6  596.02   16.85
  -4   0   7  158.71    8.56
  -4   0  -7  167.95    6.87
  -4   0  -7  169.10   11.04
  -4   0  -7  159.80   11.78
  -4   0   7  157.04   11.74
  -4   0   8    8.69    1.91
  -4   0   8   12.48    4.24
  -4   0  -8   11.59    4.65
  -4   0  -8   12.11    2.11
  -4   0   8   11.61    2.48
  -4   0  -8   15.28    3.91
  -4   0   9   96.66   10.50
  -4   0  -9  106.05   11.13
  -4   0   9  105.14    6.52
  -4   0 -10   74.86   10.32
  -4   0  10   84.12    9.78
  -4   0  11  112.59   11.22
  -4   0 -11  100.77   12.30
  -4   0 -12    1.28    4.43
  -4   0  12   -1.37    3.39
  -4   0  13  182.93   14.95
  -4   0 -13  187.10   18.13
  -4   0 -14   52.88   10.78
  -4   0  14   49.84    8.17
  -4   0  15    4.67    3.70
  -4   0 -15   -0.65    4.59
  -4   0 -16   67.08   12.17
  -4   0  17   90.14    4.93
  -4   0 -17   74.10   13.63
  -4   0  17   84.88    4.56
  -4   0  17   81.23    4.98
  -4   0 -18  236.27   23.39
  -4   0  18  219.66    8.22
  -4   0 -18  220.31    9.00
  -4   0  18  237.94    8.13
  -4   0  19   14.19    2.50
  -4   0  19   17.78    2.76
  -4   0 -19   18.37    3.22
  -4   0  20  197.99    8.06
  -4   0  20  216.01    7.87
  -4   0 -20  212.95    8.98
  -4   0  21    1.07    1.63
   4   0  21    0.74    1.72
  -4   0 -21   -1.59    2.22
  -4   0  21    0.22    1.85
  -4   0 -22  189.17    8.15
   4   0  22  181.34    7.26
  -4   0  22  174.30    7.41
  -4   0  22  177.80    6.80
  -4   0  23    6.54    2.20
  -4   0  23    7.50    1.89
   4   0  23    7.87    2.17
  -4   0 -23    4.93    2.09
  -4   0  24    2.11    1.37
   4   0  24    1.24    1.63
  -4   0  24    0.76    1.72
  -4   0 -24    3.83    1.87
  -4   0  25   17.41    2.35
  -4   0 -25   16.11    2.20
   4   0  25   19.02    2.35
  -4   0  25   15.43    1.85
   4   0  26   25.89    2.33
  -4   0  26   24.34    2.35
  -4   0  26   20.76    1.70
  -4   0  27    0.48    0.89
   4   0  27    2.15    1.04
   4  -1  27   19.17    1.78
  -4   1  27   20.00    1.74
  -4   1  26   51.27    3.06
   4  -1  26   57.25    3.33
  -4  -1 -26   52.32    3.09
  -4  -1 -25   52.08    3.67
   4  -1  25   51.36    3.52
  -4   1  25   49.14    3.41
  -4   1  25   48.80    2.72
  -4   1  24    0.96    1.11
  -4  -1 -24    0.04    1.80
  -4   1  24    0.67    1.65
   4  -1  24    2.02    1.72
  -4   1  23   15.02    2.17
  -4  -1 -23   18.52    3.02
   4  -1  23   16.71    2.06
   4  -1  23   14.04    2.54
  -4   1  23   18.00    2.63
   4  -1  22    6.52    1.70
  -4  -1 -22   10.63    2.93
  -4   1  22   10.78    2.50
  -4   1  22    8.50    1.91
   4  -1  22    7.19    2.26
   4  -1  21  148.22    5.74
  -4   1  21  142.11    6.65
   4  -1  21  141.20    6.76
  -4  -1 -21  150.85    7.69
  -4   1  21  147.63    6.22
  -4   1  20  283.20    8.69
   4  -1  20  265.46    7.69
  -4   1  20  284.61    9.43
  -4  -1 -20  282.93   10.56
  -4  -1 -19    7.09    2.67
   4  -1  19    1.50    1.28
  -4   1  19    5.02    2.02
  -4   1  19    2.20    1.59
  -4  -1 -18   66.53    5.22
  -4   1  18   64.32    4.56
  -4  -1 -18   55.06   11.67
   4  -1  18   60.49    3.74
  -4   1  18   67.36    4.41
  -4   1  17  176.80    6.69
  -4  -1 -17  186.17   21.32
  -4  -1 -17  172.76    7.87
  -4   1  17  171.86    6.98
   4  -1  17  156.71    5.63
  -4  -1 -16   33.91    9.46
  -4  -1 -15  142.30   17.50
  -4   1  15  147.96   13.74
  -4  -1 -14   62.12   11.85
  -4   1  14   83.44   10.61
  -4   1  13  193.60   15.26
  -4  -1 -13  178.30   18.13
  -4  -1 -12  181.17   17.32
  -4   1  12  202.12   15.48
  -4  -1 -11  166.37   15.67
  -4   1  11  174.54   13.74
  -4  -1 -10   49.99    8.82
  -4   1  10   47.10    7.52
  -4   1   9    0.76    3.61
  -4  -1  -9   -0.17    4.93
  -4  -1  -9    1.41    1.74
  -4  -1  -8  200.23   14.50
  -4  -1  -8  211.66    9.91
  -4   1   8  206.97   14.08
  -4   1   8  207.42    9.80
  -4  -1  -7   58.38    7.89
  -4   1   7   61.88    7.98
  -4  -1  -7   58.36    5.26
  -4   1   7   64.38    5.87
  -4   1   6  578.93   21.56
  -4   1   6  607.12   17.76
  -4  -1  -6  603.12   16.08
  -4  -1  -5  907.47   25.13
  -4  -1  -5  908.32   19.48
  -4  -1  -4  840.07   23.67
  -4  -1  -4  864.13   18.84
  -4  -1  -3    3.74    1.72
  -4  -1  -3    4.39    3.28
  -4  -1  -3    1.74    2.33
  -4  -1  -2  311.34   14.13
  -4  -1  -2  314.41   10.11
  -4  -1  -2  319.82   11.91
  -4  -1  -1 1255.94   27.78
  -4  -1  -1 1269.96   21.82
  -4  -1  -1 1340.60   24.67
  -4  -1   0 1920.20   33.65
  -4  -1   0 1962.22   29.15
  -4  -1   1 1260.39   27.02
  -4  -1   1 1273.26   24.97
  -4  -1   2  345.19   13.91
  -4  -1   2  338.73   13.67
  -4   1  -2  333.90   14.22
  -4   1  -3    1.33    3.24
  -4  -1   3    3.83    3.48
  -4  -1   3    5.13    2.70
  -4  -1   4  883.43   21.65
  -4  -1   4  867.93   23.93
  -4   1  -4  864.63   23.06
  -4  -1   5  952.79   26.21
  -4   1  -5  968.33   24.52
  -4  -1   5  982.65   22.52
  -4   1  -6  538.11   19.08
  -4  -1   6  531.92   12.85
  -4  -1   6  513.96   20.37
  -4  -1   6  528.01   16.21
  -4   1  -6  542.98   18.54
  -4   1  -7   50.10    7.09
  -4  -1   7   53.82    7.26
  -4  -1   7   60.86    4.89
  -4   1  -7   57.19    6.48
  -4   1  -8  203.27   11.74
  -4  -1   8  198.30    9.52
  -4  -1   8  199.08   13.52
  -4   1  -8  185.38   13.39
  -4   1  -9    4.15    3.85
  -4  -1   9    6.72    4.56
  -4  -1   9    4.39    2.15
  -4   1  -9    5.85    2.85
  -4  -1  10   50.34    5.56
  -4   1 -10   38.25    7.59
  -4  -1  10   50.95    7.76
  -4   1 -11  202.16   16.69
  -4  -1  11  200.53   15.24
  -4   1 -12  192.64   17.24
  -4  -1  12  219.55   16.06
  -4   1 -13  159.54   16.61
  -4  -1  13  174.39   14.82
  -4   1 -14   68.42   11.74
  -4  -1  14   72.18   10.02
  -4   1 -15  133.57   16.37
  -4  -1  15  132.63   13.54
  -4   1 -16   44.67   10.43
  -4  -1  16   38.32    3.41
  -4   1 -17  167.02   19.37
  -4  -1  17  151.26    6.13
  -4  -1  17  161.45    6.96
  -4   1 -18   72.73   13.43
  -4  -1  18   67.73    4.35
  -4  -1  18   77.55    5.04
   4  -1 -18   77.81   13.35
  -4  -1  19    5.06    2.06
  -4  -1  19    4.33    1.89
  -4   1 -19    1.72    1.78
  -4  -1  20  294.45    9.24
  -4  -1  20  280.43    9.56
  -4   1 -20  292.48   10.26
  -4   1 -21  142.67    7.17
  -4  -1  21  139.13    6.83
   4   1  21  146.28    6.56
  -4  -1  21  150.30    6.61
  -4  -1  22   10.39    2.52
  -4   1 -22    8.19    2.39
  -4  -1  22    4.37    2.02
   4   1  22    7.13    2.06
  -4  -1  23   18.21    2.61
  -4  -1  23   23.63    3.15
   4   1  23   18.24    2.59
  -4   1 -23   21.04    2.96
   4   1  24   -0.43    1.52
  -4   1 -24    0.91    1.46
  -4  -1  24   -1.26    1.85
  -4  -1  24    1.50    1.37
   4   1  25   51.10    3.33
  -4  -1  25   50.91    3.54
  -4  -1  25   48.88    3.06
  -4  -1  26   58.64    3.39
   4   1  26   58.66    3.13
  -4  -1  26   52.97    2.72
  -4  -1  27    8.85    0.98
   4   1  27   14.35    1.35
  -4  -1  27   10.76    1.04
   4  -2  27   12.30    1.52
  -4   2  27    6.61    0.91
  -4   2  26    8.35    1.43
   4  -2  26    7.69    1.65
  -4  -2 -26    9.41    1.76
  -4  -2 -25   27.80    2.91
   4  -2  25   32.17    2.93
  -4   2  25   28.04    2.52
   4  -2  25   25.28    2.06
   4  -2  24   11.67    2.35
  -4   2  24   13.08    2.22
  -4  -2 -24    8.63    2.26
   4  -2  24   11.35    1.76
   4  -2  23   21.37    2.33
  -4   2  23   18.61    2.67
  -4  -2 -23   20.21    3.24
   4  -2  23   18.61    2.76
  -4   2  23   20.19    2.22
   4  -2  22   19.95    2.93
  -4   2  22   18.41    2.70
   4  -2  22   18.61    2.37
  -4  -2 -22   20.80    3.43
  -4   2  22   18.63    2.30
  -4  -2 -21   72.23    5.72
  -4   2  21   71.58    4.78
   4  -2  21   72.60    4.24
   4  -2  21   66.75    4.78
  -4   2  21   69.64    4.24
  -4   2  20    8.35    1.96
  -4  -2 -20    3.87    2.41
   4  -2  20    6.83    1.83
  -4   2  20    6.41    2.15
  -4   2  19   76.25    4.96
  -4  -2 -19   83.57    5.93
   4  -2  19   60.77    3.98
  -4   2  19   71.68    4.46
  -4  -2 -18  105.85    6.52
   4  -2  18   97.77    4.83
  -4   2  18  106.16    5.74
  -4   2  18   99.62    5.11
  -4   2  17    7.50    1.74
  -4  -2 -17    5.67    5.33
  -4   2  17    9.56    2.11
  -4  -2 -17    6.46    2.22
   4  -2  17    9.91    1.89
  -4   2  16    9.17    1.93
  -4  -2 -16   12.54    7.26
  -4  -2 -16    9.74    2.39
  -4  -2 -15  131.20   16.82
  -4   2  15  149.98   13.93
  -4  -2 -14   90.64   14.04
  -4   2  14   74.16    9.93
  -4  -2 -13  193.47   18.87
  -4   2  13  202.75   15.78
  -4  -2 -12  227.77   19.61
  -4   2  12  235.05   16.54
  -4  -2 -11  468.69   26.34
  -4   2  11  491.10   23.30
  -4  -2 -10  920.90   25.30
  -4  -2 -10  918.97   35.06
  -4   2  10  921.75   31.21
  -4   2   9  249.24   16.00
  -4  -2  -9  264.68   18.21
  -4  -2  -9  276.87   13.58
  -4   2   9  287.22   12.06
  -4  -2  -8  381.98   15.65
  -4  -2  -7  590.10   18.80
  -4  -2  -6  559.44   17.85
  -4  -2  -5  787.64   20.78
  -4  -2  -4  449.21   15.54
  -4  -2  -4  444.19   10.72
  -4  -2  -3  626.73   14.24
  -4  -2  -3  609.73   18.15
  -4  -2  -2   92.88    7.24
  -4  -2  -2   86.92    5.98
  -4  -2  -1  736.30   17.89
  -4  -2  -1  748.47   20.00
  -4  -2   0   34.54    5.48
  -4  -2   0   33.15    4.93
  -4  -2   1  646.01   18.58
  -4  -2   1  717.08   20.43
  -4  -2   2   70.34    6.87
  -4  -2   3  523.92   18.45
  -4  -2   4  413.44   17.02
  -4   2  -5  682.57   19.34
  -4  -2   5  689.52   23.00
  -4   2  -6  530.87   18.43
  -4  -2   6  497.16   20.84
  -4   2  -6  529.61   18.93
  -4   2  -7  495.60   19.04
  -4  -2   7  467.41   15.65
  -4   2  -7  498.51   18.28
  -4  -2   7  487.23   21.28
  -4  -2   8  309.37   17.52
  -4   2  -8  333.84   15.08
  -4   2  -8  335.32   17.11
  -4  -2   8  334.90   13.87
  -4   2  -9  225.60   15.24
  -4  -2   9  241.22   12.48
  -4  -2   9  229.49   15.54
  -4   2  -9  256.55   13.19
  -4   2 -10 1064.34   26.58
  -4  -2  10 1058.53   27.39
  -4  -2  10 1037.36   33.45
  -4   2 -11  454.47   24.30
  -4  -2  11  483.49   23.76
  -4  -2  11  478.21   19.52
  -4  -2  12  245.03   17.43
  -4   2 -12  216.58   17.61
  -4   2 -13  191.77   17.76
  -4  -2  13  198.01   16.04
  -4   2 -14   99.27   13.37
  -4  -2  14  101.27   11.98
  -4   2 -15  123.26   15.30
  -4  -2  15  145.39   14.32
   4  -2 -16   12.82    7.39
  -4   2 -16    6.52    5.74
  -4  -2  16    6.69    1.72
  -4  -2  16    6.24    1.63
  -4  -2  16    1.07    3.17
   4  -2 -17    2.56    5.78
  -4  -2  17    7.28    1.87
  -4  -2  17    6.06    2.04
  -4   2 -17    4.76    5.46
  -4  -2  18  103.66    5.83
   4  -2 -18   79.01   12.65
  -4   2 -18   84.38   13.78
  -4  -2  18   93.72    5.06
  -4  -2  19   81.10    5.35
  -4  -2  19   68.12    4.50
  -4   2 -19   76.99    5.28
  -4  -2  20    6.24    2.00
  -4   2 -20    9.15    2.43
  -4  -2  20    7.00    2.37
   4   2  20    3.91    1.76
  -4  -2  21   75.53    5.19
  -4   2 -21   74.45    5.13
  -4  -2  21   75.60    4.85
   4   2  21   70.71    4.54
  -4  -2  22   19.56    2.85
   4   2  22   21.58    2.65
  -4  -2  22   21.34    3.15
  -4   2 -22   20.48    2.87
   4   2  23   22.74    2.72
  -4  -2  23   22.56    3.06
  -4  -2  23   23.54    2.80
   4   2  24    7.93    1.70
  -4  -2  24    9.46    2.20
  -4  -2  24   10.22    2.04
  -4  -2  25   29.13    2.85
   4   2  25   27.41    2.43
  -4  -2  25   29.95    2.54
  -4  -2  26    8.15    1.41
   4   2  26    7.67    1.30
  -4  -2  26    8.26    1.63
  -4  -2  27    6.74    0.93
  -4  -2  27    6.19    0.87
  -4  -2  27    9.09    1.35
   4  -3  27   29.08    2.00
   4  -3  26    9.69    1.65
   4  -3  26    7.56    1.11
  -4  -3 -26   10.95    1.78
  -4   3  26    8.39    1.22
   4  -3  25   33.78    2.96
   4  -3  25   30.04    2.33
  -4   3  25   29.34    2.33
  -4  -3 -25   35.04    3.22
  -4   3  24    1.63    1.24
  -4  -3 -24    3.76    2.13
   4  -3  24    2.39    1.78
   4  -3  24    2.11    1.41
   4  -3  23   37.86    3.04
   4  -3  23   37.60    3.56
  -4  -3 -23   40.54    4.20
  -4   3  23   38.89    3.28
  -4   3  22    5.93    1.87
  -4  -3 -22    3.22    2.35
   4  -3  22    5.39    1.87
   4  -3  22    6.30    2.15
  -4   3  21   86.46    5.06
  -4  -3 -21   83.81    6.02
   4  -3  21   87.75    5.35
   4  -3  21   85.03    4.69
  -4   3  20   24.10    2.98
  -4  -3 -20   27.78    4.06
   4  -3  20   21.67    2.72
  -4   3  19   76.75    4.85
  -4  -3 -19   80.25    5.98
   4  -3  19   74.90    4.43
  -4   3  19   76.77    4.39
  -4  -3 -18   17.50    3.30
   4  -3  18   10.87    2.02
  -4   3  18   14.13    2.37
  -4   3  18   15.69    2.30
   4  -3  17   61.66    3.96
  -4   3  17   76.79    4.69
  -4  -3 -17   79.38    5.67
  -4   3  17   69.27    4.06
  -4   3  16  107.29    5.28
  -4  -3 -16  113.92    6.39
  -4   3  15   49.91    8.52
  -4   3  14   15.00    4.89
  -4  -3 -13   46.80    9.91
  -4   3  13   55.34    8.85
  -4   3  12   13.26    5.15
  -4   3  11   31.39    6.83
  -4  -3 -11   23.24    4.85
  -4   3  10  145.78   13.06
  -4  -3 -10  133.85   10.85
  -4  -3  -9  127.74   10.63
  -4  -3  -8   96.72    9.24
  -4  -3  -7  738.52   23.69
  -4  -3  -6  116.70    9.43
  -4  -3  -5 1014.63   26.39
  -4  -3  -4  690.81   21.63
  -4  -3  -4  698.31   15.63
  -4  -3  -3    0.57    2.76
  -4  -3  -3    1.20    1.80
  -4  -3  -2  169.45    9.17
  -4  -3  -2  160.28   10.50
  -4  -3  -1   88.38    7.89
  -4  -3  -1   89.62    7.13
   4  -3   0 1100.20   18.30
  -4  -3   0 1083.25   26.52
  -4  -3   0 1101.53   24.95
  -4  -3   1  113.07    9.19
  -4  -3   1  108.46    8.54
   4  -3  -1   98.14    4.87
  -4  -3   2  168.43   10.78
  -4  -3   2  183.82   11.59
  -4  -3   3    2.02    3.24
  -4  -3   4  643.27   22.80
  -4   3  -5  967.31   21.84
  -4  -3   5  947.35   28.43
  -4   3  -6  149.46    9.61
  -4  -3   6  154.76   12.26
  -4   3  -7  685.55   21.78
  -4  -3   7  701.54   21.34
  -4  -3   7  697.98   26.37
  -4   3  -8   57.03    7.19
  -4  -3   8   49.77    6.41
  -4   3  -8   61.34    7.24
  -4  -3   8   46.45    7.67
  -4   3  -9  117.96   10.95
  -4  -3   9  117.59   11.78
  -4   3  -9  119.68    9.50
  -4  -3   9  119.59    9.89
  -4   3 -10  111.11   11.24
  -4  -3  10  119.63   12.22
  -4  -3  10  126.44   10.45
  -4   3 -10  137.20    9.78
  -4  -3  11   23.00    4.91
  -4   3 -11   20.87    6.02
  -4  -3  11   20.50    5.87
  -4   3 -12    7.96    4.11
  -4  -3  12   14.72    4.11
  -4  -3  12   10.24    4.80
  -4   3 -13   53.71    9.78
  -4  -3  13   61.01    9.72
   4  -3 -14   23.15    7.22
  -4   3 -14   20.21    6.96
  -4  -3  14   23.63    6.17
   4  -3 -15   54.93    9.89
  -4   3 -15   49.54   10.37
  -4  -3  15   41.04    7.98
  -4   3 -16   99.81   14.30
  -4  -3  16  112.44    5.26
  -4  -3  16  120.46    5.93
  -4  -3  16  111.77   12.89
   4  -3 -16  123.24   15.22
  -4  -3  17   68.32    4.35
  -4   3 -17   55.97   11.00
  -4  -3  17   88.68    5.28
   4  -3 -17   60.97   10.82
  -4  -3  18    9.09    2.30
   4  -3 -18    3.78    4.22
  -4  -3  18    8.82    2.26
  -4  -3  19   75.49    5.13
  -4   3 -19   71.62    5.02
  -4  -3  19   73.14    4.65
   4   3  19   77.16    4.54
  -4  -3  20   25.56    3.28
   4   3  20   26.24    2.85
  -4  -3  20   22.89    2.96
  -4  -3  21  103.92    5.72
   4   3  21   98.81    5.06
  -4  -3  21   98.77    5.78
  -4  -3  22    5.37    2.02
  -4  -3  22    7.80    2.39
   4   3  22    6.06    1.61
  -4  -3  23   44.86    3.87
  -4  -3  23   45.51    3.76
   4   3  23   40.69    3.09
  -4  -3  24    0.89    1.43
  -4  -3  24    1.13    1.59
   4   3  24    2.43    1.17
   4   3  25   36.91    2.37
  -4  -3  25   38.25    3.04
  -4  -3  25   41.02    2.93
  -4  -3  26    7.13    1.37
  -4  -3  26    6.89    1.26
  -4  -3  26    9.56    1.63
  -4  -3  27   17.39    1.35
  -4  -3  27   18.50    1.39
   4  -4  27    1.41    0.80
   4  -4  26    9.63    1.59
   4  -4  26   11.11    1.33
   4  -4  25    5.35    1.56
   4  -4  25    5.26    1.37
  -4  -4 -25    5.09    1.85
  -4  -4 -24   -0.74    1.89
  -4   4  24    0.70    1.11
   4  -4  24   -0.37    1.50
   4  -4  24    0.02    1.28
  -4  -4 -23    2.74    2.39
   4  -4  23    3.24    1.87
  -4   4  23    3.76    1.39
   4  -4  23    5.59    1.76
   4  -4  22   14.04    2.39
   4  -4  22   11.13    2.48
  -4   4  22   14.69    2.17
  -4  -4 -22   14.65    3.11
   4  -4  21   33.10    3.46
  -4   4  21   30.34    2.98
   4  -4  21   29.45    3.04
  -4  -4 -21   36.95    4.43
   4  -4  20   13.41    2.33
  -4  -4 -20   10.87    3.11
  -4   4  20   12.65    2.13
  -4   4  19   31.32    3.09
   4  -4  19   28.63    3.04
  -4  -4 -19   33.89    4.35
  -4  -4 -18   55.80    5.06
   4  -4  18   52.73    4.26
  -4   4  18   53.75    3.93
   4  -4  17   66.90    4.15
  -4   4  17   62.27    4.15
  -4  -4 -17   76.14    5.61
   4  -4  16   37.56    3.20
  -4   4  16   36.08    3.20
  -4  -4 -16   37.82    4.02
  -4  -4 -15   52.95    4.39
   4  -4  15   39.25    3.17
  -4   4  14  268.24   19.08
  -4   4  13  110.40   12.37
  -4  -4 -12  103.35   11.04
  -4   4  12  110.35   12.30
  -4  -4 -11  182.80   14.54
  -4  -4 -10  505.10   23.26
  -4  -4  -9  154.35   12.65
  -4  -4  -8  168.04   13.13
  -4  -4  -7 1847.15   41.17
  -4  -4  -6  986.43   29.41
  -4  -4  -5  137.07   11.22
  -4  -4  -4  626.88   17.50
  -4  -4  -4  601.75   22.13
  -4  -4  -3   14.82    3.56
  -4  -4  -3   15.19    4.59
  -4  -4  -2  368.05   14.72
  -4  -4  -2  364.44   16.95
   4  -4   1 1828.13   29.21
  -4  -4  -1 1863.08   37.67
  -4  -4  -1 1821.52   33.93
  -4  -4   0  851.96   24.19
  -4  -4   0  862.43   25.76
   4  -4   0  793.23   18.28
  -4  -4   1 1848.11   36.28
  -4  -4   1 1858.97   37.89
  -4  -4   2  327.91   16.37
  -4  -4   2  315.30   15.98
  -4  -4   3   31.30    5.87
  -4  -4   3   27.21    5.85
  -4  -4   4  607.62   23.45
  -4  -4   5  152.45   12.52
  -4  -4   6  966.24   31.28
  -4   4  -6  944.22   22.63
  -4   4  -7 1799.31   34.15
  -4  -4   7 1870.52   44.80
  -4   4  -8  156.85   11.15
  -4  -4   8  169.95   14.41
  -4  -4   8  172.47   12.41
  -4   4  -9  138.07   11.30
  -4  -4   9  152.63   12.19
  -4   4  -9  135.04   10.65
  -4  -4   9  122.70   12.32
  -4  -4  10  534.63   23.17
  -4  -4  10  525.79   25.78
  -4   4 -10  497.14   22.65
   4  -4 -10  516.64   22.39
  -4  -4  11  211.55   15.17
  -4  -4  11  203.77   16.71
  -4   4 -11  197.99   15.26
   4  -4 -11  230.51   15.98
  -4   4 -12  116.44   12.63
  -4  -4  12  133.07   12.50
  -4  -4  12  140.96   14.15
   4  -4 -12  128.41   12.65
  -4   4 -13   99.35   12.41
  -4  -4  13  110.05   11.74
  -4  -4  13  121.52   13.28
   4  -4 -13  124.79   13.15
  -4   4 -14  238.38   19.63
  -4  -4  14  260.26   19.58
   4  -4 -14  273.76   19.87
   4  -4 -15   41.25    8.48
  -4   4 -15   25.17    7.41
  -4  -4  15   39.52    3.15
  -4  -4  15   26.54    6.59
  -4  -4  16   35.67    3.37
  -4   4 -16   30.04    8.39
   4  -4 -16   26.24    6.46
  -4  -4  16   24.95    6.46
  -4  -4  16   36.60    3.26
  -4   4 -17   61.58   11.52
  -4  -4  17   78.53    4.63
  -4  -4  17   76.94    4.93
  -4  -4  18   52.90    4.02
  -4  -4  18   53.71    4.37
  -4  -4  19   26.56    3.06
  -4  -4  19   30.23    3.37
  -4  -4  20   17.39    2.89
  -4  -4  20   13.87    2.52
  -4  -4  21   27.02    3.35
   4  -4 -22   11.00    1.93
  -4  -4  22   14.06    2.61
  -4  -4  22   13.61    2.61
  -4  -4  23    3.46    1.87
  -4  -4  23    3.87    1.74
  -4  -4  24   -0.26    1.56
  -4  -4  24    0.78    1.52
  -4  -4  25    5.50    1.50
  -4  -4  25    1.91    1.33
  -4  -4  26   12.35    1.52
  -4  -4  26   12.93    1.50
  -4  -4  26   11.17    1.54
  -4  -4  27    0.41    0.52
  -4  -4  27    1.89    0.63
  -4  -4  27    1.17    0.70
   4  -5  26    7.30    1.15
   4  -5  26   11.02    1.41
   4  -5  25   -1.30    1.15
   4  -5  25    0.89    1.22
  -4  -5 -25    0.09    1.52
   4  -5  24   36.12    2.74
   4  -5  24   28.65    2.70
  -4  -5 -24   29.19    3.30
  -4  -5 -23   10.35    2.85
   4  -5  23    7.13    1.93
   4  -5  23    4.26    1.74
  -4  -5 -22   65.90    5.24
   4  -5  22   68.34    4.56
   4  -5  22   66.29    4.35
   4  -5  21   60.93    4.61
  -4  -5 -21   61.43    5.33
   4  -5  21   56.53    4.35
   4  -5  20   82.31    4.98
  -4  -5 -20   84.25    6.13
  -4  -5 -19   10.48    3.39
   4  -5  19   16.52    2.63
   4  -5  18   50.19    4.46
  -4  -5 -18   40.58    4.43
  -4  -5 -17   52.54    4.85
   4  -5  17   53.95    3.80
   4  -5  16   31.15    3.37
  -4  -5 -16   29.67    3.72
  -4  -5 -15  114.16    6.39
   4  -5  15  144.74    5.89
  -4   5  14   30.21    7.02
  -4   5  13   23.43    6.65
  -4  -5 -13   22.06    5.78
  -4  -5 -12  202.27   16.82
  -4  -5 -11  248.22   18.17
  -4  -5 -10   50.54    8.39
  -4  -5  -9  242.55   17.43
  -4  -5  -8   89.83   10.59
  -4  -5  -7  359.05   20.08
  -4  -5  -6   30.65    6.50
  -4  -5  -5  325.49   18.45
  -4  -5  -4  118.07   11.04
  -4  -5  -3  260.33   13.32
   4  -5   3  262.11   13.69
  -4  -5  -3  252.85   15.63
   4  -5   2  531.90   18.80
  -4  -5  -2  523.57   21.97
  -4  -5  -2  525.22   19.08
   4  -5   1    0.76    2.30
  -4  -5  -1   -2.83    2.91
  -4  -5  -1    0.96    3.65
  -4  -5   0   12.50    4.26
  -4  -5   0   12.19    4.48
  -4  -5   1    2.91    3.85
  -4  -5   1    1.28    3.65
  -4  -5   2  558.24   22.74
  -4  -5   2  544.29   22.37
  -4  -5   3  229.05   15.17
  -4  -5   3  251.16   15.91
  -4  -5   4  103.74   10.67
  -4  -5   4  111.83   11.13
  -4  -5   5  342.40   19.48
  -4  -5   6   35.76    7.26
  -4  -5   7  400.59   22.00
  -4  -5   8  107.57   11.85
  -4  -5   9  268.02   19.00
  -4  -5  10   51.97    8.56
  -4  -5  11  274.22   18.43
  -4  -5  11  256.03   19.30
  -4  -5  12  201.53   17.69
  -4  -5  12  212.10   16.69
  -4  -5  13   28.78    7.06
  -4  -5  13   24.13    5.83
  -4  -5  14   19.61    6.28
  -4  -5  15  107.24    5.11
  -4  -5  15  103.27   13.06
  -4  -5  16   21.24    2.56
  -4  -5  16   19.28    6.46
  -4  -5  16   20.17    2.83
  -4  -5  17   55.43    4.09
  -4  -5  17   58.51    4.37
  -4  -5  18   43.38    3.70
  -4  -5  18   40.80    3.87
  -4  -5  19   11.26    2.48
  -4  -5  19   14.15    2.61
  -4  -5  20   88.40    5.28
  -4  -5  20   83.38    4.89
   4  -5 -21   53.67    4.00
  -4  -5  21   68.38    4.59
  -4  -5  22   72.47    4.52
  -4  -5  22   64.86    4.54
  -4  -5  23    5.09    1.93
  -4  -5  23    6.28    1.83
   4  -5 -23    4.20    1.30
  -4  -5  24   27.02    2.63
  -4  -5  24   31.02    2.85
  -4  -5  25    0.74    1.09
  -4  -5  25   -0.17    1.09
  -4  -5  25    0.61    1.20
  -4  -5  26    8.17    1.22
  -4  -5  26   10.72    1.33
  -4  -5  26    8.91    1.33
  -4  -5  27   11.76    1.00
   4  -6  26    1.33    0.67
   4  -6  26    1.61    0.74
   4  -6  25   34.78    2.33
   4  -6  25   34.97    2.28
   4  -6  24  153.78    5.09
   4  -6  24  152.72    5.15
  -4  -6 -24  148.28    6.09
  -4   6  24  129.22    4.13
   4  -6  23   15.80    2.30
   4  -6  23   12.35    2.09
  -4  -6 -23    8.19    2.46
  -4  -6 -22    1.17    2.26
   4  -6  22    2.89    1.85
   4  -6  22   -0.11    1.48
  -4  -6 -21   15.63    3.39
   4  -6  21   23.17    2.89
   4  -6  21   25.15    3.00
   4  -6  20   40.39    4.00
  -4  -6 -20   38.04    4.41
   4  -6  19   33.30    3.72
  -4  -6 -19   27.54    3.89
   4  -6  18  342.14    9.26
  -4  -6 -18  204.27    9.17
  -4  -6 -17  181.41    8.54
   4  -6  17  243.44    8.48
   4  -6  16  471.04   10.89
  -4  -6 -16  318.89   10.93
  -4  -6 -15  129.18    6.91
   4  -6  15  162.00    6.54
  -4  -6 -14  246.27    9.04
  -4   6  14  226.88   18.67
   4  -6  14  254.92    7.89
  -4   6  13   52.27    9.56
  -4  -6 -13   63.45   10.26
  -4  -6 -12   42.84    8.50
  -4  -6 -11  440.37   26.10
  -4  -6 -10  203.53   17.65
  -4  -6  -9  293.24   20.48
  -4  -6  -8   89.46   11.41
  -4  -6  -7  132.87   13.52
   4  -6   7  125.29   12.37
   4  -6   6  147.17   12.80
  -4  -6  -6  138.50   13.56
   4  -6   5  734.52   26.91
  -4  -6  -5  733.63   29.50
   4  -6   4  723.69   25.76
  -4  -6  -4  696.48   28.26
  -4  -6  -3  232.27   16.28
   4  -6   3  242.51   14.41
  -4  -6  -2  418.50   18.95
   4  -6   2  411.39   17.98
  -4  -6  -2  398.11   20.76
  -4  -6  -1   91.59   10.41
  -4  -6  -1   75.36    8.56
  -4  -6   0  288.48   17.43
  -4  -6   0  287.46   16.41
  -4  -6   1   88.10   10.06
  -4  -6   1   86.81    9.59
  -4  -6   2  401.39   20.45
  -4  -6   2  409.35   20.89
  -4  -6   3  240.20   16.30
  -4  -6   3  242.81   16.52
  -4  -6   4  670.92   26.65
  -4  -6   4  697.57   28.43
  -4  -6   5  809.72   30.32
  -4  -6   5  799.59   31.41
  -4  -6   6  159.32   14.67
  -4  -6   7  153.11   14.67
  -4  -6   8   94.20   11.89
  -4  -6   9  337.06   22.41
  -4  -6  10  217.92   18.50
  -4  -6  11  484.36   27.65
  -4  -6  12   51.30    9.37
  -4  -6  13   59.86   10.41
  -4  -6  14  212.75    7.22
  -4  -6  14  241.72   20.02
  -4  -6  15  136.96    5.76
  -4  -6  15  102.07    5.30
  -4  -6  15  123.46   14.00
  -4  -6  16  316.43    8.91
  -4  -6  16  322.78    9.50
  -4  -6  17  166.74    7.02
  -4  -6  17  174.93    6.74
  -4  -6  18  205.82    7.37
  -4  -6  18  198.21    7.63
  -4  -6  19   20.11    2.78
  -4  -6  19   22.15    2.85
   4  -6 -20   36.15    3.72
  -4  -6  20   43.95    3.65
  -4  -6  20   39.75    3.56
   4  -6 -21   23.47    2.76
  -4  -6  21   21.91    2.74
  -4  -6  22   -1.15    1.83
  -4  -6  22    1.91    1.63
   4  -6 -22    0.35    1.28
  -4  -6  23    9.09    1.76
  -4  -6  23   10.74    2.11
  -4  -6  23   14.08    2.13
   4  -6 -23    7.78    1.59
  -4  -6  24  138.61    4.74
  -4  -6  24  149.59    5.28
  -4  -6  24  148.85    5.11
  -4  -6  25   31.06    2.22
  -4  -6  25   32.54    2.09
  -4  -6  25   30.65    2.28
  -4  -6  26    2.04    0.85
  -4  -6  26    2.74    0.80
   4  -7  25    5.63    1.17
   4  -7  25    2.26    0.72
   4  -7  24   33.30    2.46
   4  -7  24   27.15    2.13
  -4   7  24   24.10    1.85
   4  -7  23   44.58    3.02
   4  -7  23   54.17    3.46
  -4  -7 -23   40.17    3.59
  -4   7  23   38.93    2.74
   4  -7  22   26.60    2.70
   4  -7  22   26.41    2.96
  -4  -7 -22   20.34    3.06
   4  -7  21    9.98    2.26
  -4  -7 -21    9.91    2.93
   4  -7  21    9.11    2.00
   4  -7  20   80.03    4.80
   4  -7  20   78.27    4.48
   4  -7  19   38.04    3.37
   4  -7  19   40.28    3.56
  -4  -7 -18   35.49    4.30
   4  -7  18   57.17    4.11
   4  -7  17   32.15    3.35
  -4  -7 -17   23.69    3.63
   4  -7  16  253.53    8.11
  -4  -7 -16  178.78    8.28
   4  -7  15   55.56   11.26
   4  -7  15   47.36    3.85
  -4  -7 -15   53.47    4.78
  -4  -7 -14   26.69    2.83
  -4  -7 -14   27.54    8.32
  -4  -7 -14   23.63    3.22
   4  -7  14   28.50    2.89
   4  -7  13  204.21   20.74
  -4  -7 -13  214.68    7.17
   4  -7  13  195.49    7.28
   4  -7  13  204.25    6.78
  -4  -7 -13  205.53    8.09
  -4  -7 -12   71.10   11.43
   4  -7  12   73.88   12.04
  -4  -7 -11   11.30    4.67
   4  -7  11    2.37    3.50
  -4  -7 -10   24.69    7.46
   4  -7  10   20.34    6.56
  -4  -7  -9   94.59   12.98
   4  -7   9   99.53   12.43
  -4  -7  -8  154.48   15.80
   4  -7   8  165.78   15.67
  -4  -7  -7  173.17   16.61
   4  -7   7  185.60   15.67
   4  -7   6  257.66   17.87
  -4  -7  -6  265.98   19.89
   4  -7   5    3.52    3.61
  -4  -7  -5    4.91    3.96
   4  -7   4  189.25   14.15
  -4  -7  -4  174.78   15.54
  -4  -7  -3  259.92   18.43
   4  -7   3  269.70   16.41
  -4  -7  -2   16.74    5.83
  -4  -7  -1  311.93   18.56
  -4  -7  -1  286.46   18.87
  -4  -7   0   51.41    8.28
  -4  -7   0   61.32    8.69
  -4  -7   1  284.78   18.41
  -4  -7   1  292.13   18.28
  -4  -7   2   14.32    5.19
  -4  -7   2   25.52    6.52
  -4  -7   3  235.22   16.87
  -4  -7   3  246.77   17.58
  -4  -7   4  201.36   15.56
  -4  -7   4  209.42   16.58
  -4  -7   5    2.39    3.43
  -4  -7   5    1.50    3.59
  -4  -7   6  235.44   18.41
  -4  -7   7  185.95   16.82
  -4  -7   8  166.37   16.11
  -4  -7   9  100.44   12.80
  -4  -7  10   24.15    6.93
  -4  -7  11   -1.74    3.98
  -4  -7  12   88.33   12.41
  -4  -7  13  183.45    6.26
  -4  -7  13  194.14   18.54
  -4  -7  14   23.11    6.15
  -4  -7  14   28.97    2.96
  -4  -7  15   33.02    7.54
  -4  -7  15   40.67    3.39
  -4  -7  16  160.34    6.59
  -4  -7  16  170.97    6.56
  -4  -7  17   23.15    2.85
  -4  -7  17   17.76    2.54
   4  -7 -18   38.02    3.85
  -4  -7  18   42.82    3.54
  -4  -7  18   38.91    3.39
  -4  -7  19   22.82    2.76
   4  -7 -19   18.34    2.93
  -4  -7  19   16.98    2.46
   4  -7 -20   47.54    4.04
  -4  -7  20   47.93    3.56
  -4  -7  20   52.25    3.78
   4  -7 -21    8.11    1.98
  -4  -7  21    8.24    1.78
   4  -7 -22   18.06    2.30
  -4  -7  22   20.63    2.20
  -4  -7  22   19.06    2.59
  -4  -7  22   20.04    2.52
   4  -7 -23   33.13    2.48
  -4  -7  23   46.75    3.11
  -4  -7  23   39.67    3.09
  -4  -7  23   39.10    2.61
  -4  -7  24   32.10    2.39
  -4  -7  24   26.52    2.30
  -4  -7  24   19.89    1.65
  -4  -7  25    3.22    1.02
  -4  -7  25    5.00    1.07
  -4  -7  26   16.71    1.15
   4  -8  25   38.30    1.89
   4  -8  24   11.26    1.50
  -4   8  24    8.78    1.13
   4  -8  23    1.20    0.87
  -4   8  23    1.00    1.00
   4  -8  23    1.93    1.30
   4  -8  22   14.72    1.83
   4  -8  22   16.78    2.24
  -4   8  22   11.63    1.93
   4  -8  21   30.04    2.56
   4  -8  21   30.50    2.89
   4  -8  20   42.19    3.09
   4  -8  20   45.12    3.52
   4  -8  19   32.34    2.91
   4  -8  19   32.04    3.11
  -4  -8 -18   12.43    2.87
   4  -8  18   16.78    2.30
   4  -8  18   14.41    2.54
  -4  -8 -17    7.96    2.61
   4  -8  17   13.43    2.56
   4  -8  17    7.48    1.83
  -4  -8 -16   38.86    3.46
   4  -8  16   47.41    3.89
  -4  -8 -16   42.41    4.35
  -4  -8 -15  112.68    5.67
  -4  -8 -15  114.40    6.56
   4  -8  15  117.22    5.56
  -4  -8 -14  220.66    7.80
   4  -8  14  194.40   19.95
   4  -8  14  213.49    7.19
   4  -8  13  188.34    6.67
  -4  -8 -13  179.97    7.13
   4  -8  13  184.15    7.39
   4  -8  13  184.62   19.41
  -4  -8 -13  186.51    7.87
  -4  -8 -13  189.10   19.39
   4  -8  12  104.92    4.91
  -4  -8 -12   83.40    4.87
   4  -8  12  109.53   14.80
  -4  -8 -12  107.64   15.15
   4  -8  12  117.68    5.76
  -4  -8 -12   94.51    5.43
  -4  -8 -11    1.50    5.19
   4  -8  11    4.02    4.80
   4  -8  11    0.61    1.28
   4  -8  11    1.85    1.48
  -4  -8 -11    1.59    1.56
   4  -8  10  138.20   15.82
  -4  -8 -10  135.50   16.52
   4  -8   9  156.11   16.30
  -4  -8  -9  140.15   16.35
  -4  -8  -8  126.15   15.58
   4  -8   8  129.68   14.32
  -4  -8  -7  527.24   30.45
   4  -8   7  533.42   27.91
  -4  -8  -6  156.80   16.37
   4  -8   6  167.02   15.28
  -4  -8  -5  259.42   20.39
   4  -8   5  238.44   17.71
   4  -8   4   31.58    6.96
  -4  -8  -4   36.84    8.17
  -4  -8  -3  109.09   12.95
  -4  -8  -2   25.56    6.85
  -4  -8  -1  396.76   23.65
  -4  -8   0   18.52    6.30
   4  -8   0   26.52    5.37
  -4  -8   0   19.08    5.80
  -4  -8   1  427.28   23.95
  -4  -8   1  410.24   23.37
  -4  -8   2   29.47    7.17
  -4  -8   2   32.82    7.15
  -4  -8   3  107.92   12.19
  -4  -8   3  118.74   12.95
  -4  -8   4   39.32    8.30
  -4  -8   4   35.99    7.30
  -4  -8   5  293.28   20.06
  -4  -8   5  292.98   20.84
  -4  -8   6  156.87   15.76
  -4  -8   7  500.64   28.15
  -4  -8   8  106.22   13.61
  -4  -8   9  139.04   15.69
  -4  -8  10  152.30   16.35
  -4  -8  11   -0.54    4.48
  -4  -8  11    2.39    1.59
  -4  -8  11    0.48    1.37
  -4  -8  12   73.68    4.43
  -4  -8  12   84.10   12.45
  -4  -8  13  160.43    5.96
  -4  -8  13  166.21   16.95
  -4  -8  14  195.30    6.72
  -4  -8  14  167.21   17.54
   4  -8 -15  100.81    6.09
  -4  -8  15   96.85    4.87
  -4  -8  16   38.65    3.35
   4  -8 -16   42.73    4.26
  -4  -8  17    8.13    1.87
   4  -8 -17    8.65    2.59
   4  -8 -18    6.93    2.41
  -4  -8  18    7.61    2.22
  -4  -8  18    9.09    2.04
  -4  -8  19   16.26    2.63
  -4  -8  19   15.91    2.43
   4  -8 -19   19.76    2.93
   4  -8 -20   24.17    2.89
  -4  -8  20   26.65    3.06
  -4  -8  20   27.19    2.52
  -4  -8  21   14.37    2.39
   4  -8 -21   16.41    2.37
  -4  -8  21   16.78    2.33
  -4  -8  21   14.08    1.74
  -4  -8  22   12.76    1.89
   4  -8 -22    9.24    1.76
  -4  -8  22   11.22    2.02
  -4  -8  23    0.48    1.17
  -4  -8  23    0.83    1.09
   4  -8 -23    2.22    1.07
  -4  -8  24   11.63    1.48
  -4  -8  24   13.41    1.48
  -4  -8  25   33.17    1.70
  -4  -8  25   30.52    1.67
   4  -9  24    2.52    0.87
   4  -9  23   11.09    1.54
  -4   9  23    5.74    1.15
   4  -9  22   26.63    2.33
  -4   9  22   17.76    2.02
   4  -9  21   45.43    3.04
  -4   9  21   21.80    2.52
   4  -9  20   17.21    2.26
  -4  -9 -19   25.19    3.33
   4  -9  19   47.99    3.74
   4  -9  18   22.17    2.72
  -4  -9 -18   13.87    2.96
  -4  -9 -17    0.35    1.43
  -4  -9 -17    0.76    2.04
   4  -9  17    0.07    1.59
   4  -9  16   54.12    3.98
  -4  -9 -16   47.17    3.93
  -4  -9 -16   50.99    4.59
  -4  -9 -15   30.15    3.33
  -4  -9 -15   33.56    3.78
   4  -9  15   33.17    3.15
  -4  -9 -14  105.01    5.80
   4  -9  14  102.81    5.02
   4  -9  14  106.48    5.96
  -4  -9 -14  105.29    6.11
  -4  -9 -13   19.91    2.98
  -4  -9 -13   19.84    3.04
   4  -9  13   17.91    2.39
   4  -9  13   19.11    2.89
   4  -9  12  112.72    5.91
  -4  -9 -12  122.05    6.17
  -4  -9 -12  122.33    6.19
   4  -9  12  113.50    5.15
  -4  -9 -12   89.79   13.91
   4  -9  12   99.31   13.82
  -4  -9 -11  187.71    7.65
  -4  -9 -11  203.69    7.63
   4  -9  11  185.12    6.37
  -4  -9 -11  168.97   19.00
   4  -9  11  183.93   18.78
   4  -9  11  198.23    7.48
  -4  -9 -10  130.70    6.33
  -4  -9 -10  119.74   16.08
   4  -9  10  145.76    6.28
   4  -9  10  122.87   15.22
   4  -9   9    4.72    3.30
  -4  -9  -9    6.93    2.20
  -4  -9  -9    1.04    4.11
   4  -9   9    6.02    1.59
   4  -9   9    3.39    1.30
   4  -9   8   65.90   10.74
  -4  -9  -8   73.62   12.59
   4  -9   7    5.74    4.04
  -4  -9  -7    6.80    4.91
  -4  -9  -6  303.45   23.91
   4  -9   6  288.82   21.02
  -4  -9  -5   57.73   10.56
  -4  -9  -4  145.24   16.02
  -4  -9  -3   87.14   12.72
  -4  -9  -2    1.26    3.28
  -4  -9  -1   -0.04    4.46
  -4  -9   0   76.86   11.30
   4  -9  -1    2.33    2.80
  -4  -9   1    3.70    4.00
  -4  -9   2    1.52    3.89
  -4  -9   2    1.61    3.48
   4  -9  -2    1.80    2.70
  -4  -9   3   91.07   12.50
  -4  -9   3   85.33   11.48
  -4  -9   4  144.70   15.82
  -4  -9   4  141.87   14.56
  -4  -9   5   49.49    9.52
  -4  -9   5   49.58    9.00
  -4  -9   6  296.39   22.63
  -4  -9   7    0.87    3.85
  -4  -9   8   88.46   12.76
  -4  -9   9    6.17    1.76
  -4  -9   9    6.80    1.65
   4  -9  -9    5.13    1.85
  -4  -9   9    5.35    4.78
  -4  -9  10  123.44    5.50
   4  -9 -10  124.24    6.11
  -4  -9  10  116.31    5.37
  -4  -9  10  106.35    5.17
  -4  -9  10  111.44   15.08
  -4  -9  11  196.93    6.87
  -4  -9  11  206.75    7.37
   4  -9 -11  191.93    7.67
  -4  -9  11  206.47    7.28
  -4  -9  11  203.93   19.74
  -4  -9  12  105.92    5.02
  -4  -9  12  111.53    5.72
   4  -9 -12  113.57    6.13
  -4  -9  12  110.74    5.54
  -4  -9  12  108.53   14.85
   4  -9 -13   18.19    3.02
  -4  -9  13   16.08    2.48
  -4  -9  14   93.16    4.63
  -4  -9  14   92.99    5.35
   4  -9 -14  106.70    6.13
  -4  -9  15   32.71    2.98
   4  -9 -15   30.50    3.63
  -4  -9  15   28.65    3.20
   4  -9 -16   52.67    4.46
  -4  -9  16   50.43    4.09
  -4  -9  16   52.58    3.59
  -4  -9  17   -0.70    1.67
   4  -9 -17    0.83    2.09
  -4  -9  17   -0.30    1.74
   4  -9 -18   19.19    3.04
  -4  -9  18   14.00    2.43
   4  -9 -19   27.93    3.11
  -4  -9  19   28.93    2.98
  -4  -9  20    6.48    1.65
   4  -9 -20    8.72    2.13
  -4  -9  20    9.17    1.93
  -4  -9  21   24.19    2.37
  -4  -9  21   19.65    2.24
   4  -9 -21   21.24    2.41
  -4  -9  22   12.11    1.72
  -4  -9  22   13.22    1.78
   4  -9 -22   12.54    1.76
  -4  -9  23    5.24    1.22
  -4  -9  23    4.89    1.11
   4  -9 -23    4.22    1.02
  -4  -9  24    3.41    0.83
  -4  -9  24    1.43    0.70
   4 -10  23   59.62    2.37
  -4  10  23   34.84    1.89
   4 -10  22   13.76    1.54
  -4  10  22    6.46    1.30
   4 -10  21    1.52    1.17
  -4  10  21   -0.30    1.13
   4 -10  20    4.74    1.54
  -4  10  20    2.41    1.48
  -4  10  19    3.87    1.85
   4 -10  19    5.50    1.78
   4 -10  18   54.80    3.67
  -4 -10 -18   54.43    3.43
   4 -10  17   12.45    2.17
  -4 -10 -17   12.43    2.20
  -4 -10 -16    0.43    1.98
   4 -10  16    0.30    1.48
  -4 -10 -16    1.43    1.59
  -4 -10 -15   15.65    2.76
  -4 -10 -15   14.82    2.67
   4 -10  15   13.58    2.26
  -4 -10 -14    1.83    1.98
  -4 -10 -14    0.63    1.80
   4 -10  14    3.59    2.00
   4 -10  14    0.22    1.39
  -4 -10 -13   96.18    5.85
   4 -10  13   92.70    4.65
  -4 -10 -13   95.46    5.63
   4 -10  13   98.07    5.72
  -4 -10 -12  151.82    7.15
  -4 -10 -12  159.37    6.89
   4 -10  12  150.32    5.85
   4 -10  12  154.63    7.04
  -4 -10 -11   71.53    5.09
   4 -10  11   70.05    4.78
  -4 -10 -11   80.40    4.87
   4 -10  11   67.58    4.00
  -4 -10 -10    2.89    1.91
   4 -10  10    0.65    1.22
   4 -10  10    2.28    1.70
  -4 -10  -9   16.24    6.96
   4 -10   9   11.93    2.20
   4 -10   9   11.56    1.85
  -4 -10  -9   13.52    2.74
  -4 -10  -8    1.59    1.70
   4 -10   8    2.54    1.59
  -4 -10  -8    2.06    5.17
   4 -10   8    4.35    1.78
  -4 -10  -7   28.17    3.20
   4 -10   7   29.13    3.02
   4 -10   7   24.00    2.72
  -4 -10  -7   26.19    8.32
  -4  10   7   24.37    2.85
   4 -10   6   39.06    3.39
  -4 -10  -6   37.54    3.52
   4 -10   6   39.17    3.33
  -4 -10  -6   27.26    7.78
  -4  10   6   33.41    3.15
  -4 -10  -5  104.29    5.35
  -4 -10  -5  110.72   15.30
   4 -10   5  106.66    5.17
  -4 -10  -4  135.63   16.50
  -4 -10  -3  183.73   18.61
  -4 -10  -2  235.31   20.74
  -4 -10  -1   77.66   12.17
  -4 -10   0   29.10    8.52
  -4 -10   1   76.51   11.37
  -4 -10   2  199.80   18.21
   4 -10  -2  222.47   17.39
  -4 -10   3  172.65   16.85
   4 -10  -3  174.43   16.21
  -4 -10   4  130.18   14.50
   4 -10  -4  150.82   15.65
  -4 -10   5   86.57    4.89
  -4 -10   5   89.42   12.15
   4 -10  -5   89.44   12.59
  -4 -10   6   37.43    3.50
   4 -10  -6   37.28    3.17
  -4 -10   6   42.78    9.37
  -4 -10   7   15.43    2.11
  -4 -10   7   18.02    2.54
   4 -10  -7   17.63    2.46
  -4 -10   7   16.56    2.11
  -4 -10   7   18.95    7.41
   4 -10  -8    6.43    2.00
  -4 -10   8    4.02    1.80
  -4 -10   8    3.52    1.28
  -4 -10   8    4.00    1.28
   4 -10  -9   15.04    2.54
  -4 -10   9   15.80    2.41
  -4 -10   9   11.50    2.15
  -4 -10   9   12.59    5.76
  -4 -10   9   16.08    2.22
  -4 -10  10    0.35    1.48
  -4 -10  10   -3.06    4.35
   4 -10 -10    1.20    1.65
  -4 -10  10    1.35    1.33
  -4 -10  10    1.39    1.52
  -4 -10  11   68.86    4.39
   4 -10 -11   67.86    4.89
  -4 -10  11   68.58    4.46
  -4 -10  11   62.60    4.17
  -4 -10  12  157.85    6.33
   4 -10 -12  138.00    6.87
  -4 -10  12  141.91    6.24
  -4 -10  12  143.00    6.50
  -4 -10  13   89.12    4.67
   4 -10 -13   94.22    5.76
  -4 -10  13   84.29    4.85
   4 -10 -14    0.57    1.96
  -4 -10  14   -0.13    1.52
   4 -10 -15   12.69    2.74
  -4 -10  15   12.93    2.30
  -4 -10  16   -0.85    1.61
   4 -10 -16    0.09    2.28
  -4 -10  17   12.17    2.17
   4 -10 -17   13.17    2.70
   4 -10 -18   53.49    4.15
  -4 -10  18   47.41    3.50
  -4 -10  19    5.83    1.70
   4 -10 -19    5.54    2.00
  -4 -10  19    4.63    1.61
  -4 -10  20    1.30    1.15
  -4 -10  20    3.22    1.37
   4 -10 -20    2.09    1.54
  -4 -10  21    1.26    1.07
  -4 -10  21    2.59    1.15
   4 -10 -21    0.33    1.28
  -4 -10  22    6.24    1.13
   4 -10 -22    7.46    1.35
  -4 -10  22   10.22    1.35
  -4 -10  23   35.36    1.72
  -4 -10  23   17.26    1.22
   4 -11  22    4.17    0.78
  -4  11  22    2.20    0.78
  -4  11  21   65.27    3.13
   4 -11  21   84.53    3.33
   4 -11  20    1.76    1.02
  -4  11  20   -0.17    1.15
   4 -11  19   19.15    1.98
  -4  11  19   19.52    2.43
   4 -11  18    0.85    1.20
  -4 -11 -18    1.37    1.24
  -4  11  18    1.07    1.50
  -4 -11 -17   22.74    2.63
   4 -11  17   22.52    2.30
  -4  11  17   23.06    2.98
  -4 -11 -16   19.11    2.74
   4 -11  16   23.97    2.46
  -4  11  16   20.32    3.00
   4 -11  15    9.78    1.87
  -4 -11 -15    7.65    2.28
  -4  11  15    8.85    2.28
  -4 -11 -14   18.58    3.00
   4 -11  14   18.93    2.28
  -4  11  14   16.08    2.80
   4 -11  13   10.32    2.35
  -4 -11 -13    9.78    2.54
  -4  11  13    9.00    2.35
   4 -11  13   10.56    1.89
  -4 -11 -12  187.12    7.98
   4 -11  12  175.73    6.09
   4 -11  12  172.86    7.43
  -4  11  12  169.93    7.61
  -4 -11 -11  120.92    6.63
   4 -11  11  120.11    5.09
   4 -11  11  118.61    6.13
  -4  11  11  113.33    6.15
  -4 -11 -10   33.39    3.87
   4 -11  10   33.99    2.76
   4 -11  10   33.56    3.54
  -4  11  10   33.08    3.63
   4 -11   9   17.35    2.06
   4 -11   9   11.54    2.22
  -4 -11  -9   15.37    3.00
  -4  11   9   12.80    2.46
  -4 -11  -8  117.33    6.39
   4 -11   8  110.22    5.78
  -4  11   8  109.42    5.85
   4 -11   8  105.57    5.67
  -4 -11  -7    5.00    2.20
   4 -11   7    7.89    2.09
   4 -11   7    5.33    1.85
  -4  11   7    7.91    2.11
  -4 -11  -6  169.15    7.39
  -4  11   6  163.04    6.83
  -4 -11  -6  182.69   20.32
   4 -11   6  170.41    6.98
   4 -11   6  167.50    7.00
  -4 -11  -5    6.87    2.09
  -4 -11  -5    1.52    3.96
   4 -11   5    3.96    1.50
   4 -11   5    5.24    1.54
  -4  11   5    4.04    1.59
  -4 -11  -4   56.88    4.28
   4 -11   4   56.49    4.13
  -4  11   4   57.08    3.93
   4 -11   4   57.97    3.98
  -4 -11  -4   54.99   11.09
  -4  11   3   13.26    2.04
   4 -11   3   13.63    2.20
  -4 -11  -3   11.54    6.00
  -4 -11  -3    9.52    2.17
   4 -11   3   12.65    2.26
  -4 -11  -2   32.54    2.98
  -4 -11  -2   38.04    3.43
   4 -11   2   42.99    3.43
  -4 -11  -2   34.58    8.85
  -4  11   2   40.99    3.13
  -4 -11  -1   86.03    4.85
   4 -11   1   94.46    5.00
  -4 -11  -1   83.38   12.76
  -4 -11  -1   92.12    5.04
  -4 -11   0   31.76    3.26
  -4 -11   0   30.30    3.09
   4 -11   0   24.71    2.76
  -4 -11   1   93.20    5.24
  -4 -11   1   84.64    4.85
   4 -11  -1   85.23    4.74
  -4 -11   1   82.57   12.48
  -4 -11   2   38.52    3.56
  -4 -11   2   37.95    3.28
  -4 -11   2   31.86    7.93
  -4 -11   2   41.82    3.13
  -4 -11   3   10.35    2.37
  -4 -11   3    6.52    4.85
  -4 -11   3    8.52    1.83
  -4 -11   4   60.90    4.43
  -4 -11   4   81.64    4.13
   4 -11  -4   60.12    3.78
  -4 -11   4   55.01    3.70
  -4 -11   4   58.38   10.22
   4 -11  -4   52.49    9.91
  -4 -11   5    6.93    2.22
   4 -11  -5    5.85    1.87
  -4 -11   5    7.02    1.52
   4 -11  -5   11.72    5.09
  -4 -11   5    7.50    1.85
  -4 -11   6  156.58    6.98
  -4 -11   6  170.65    5.91
   4 -11  -6  175.10    6.87
  -4 -11   6  170.17    6.43
   4 -11  -6  173.19   18.58
   4 -11  -7    6.96    2.02
  -4 -11   7    9.87    2.37
  -4 -11   7    8.91    1.80
  -4 -11   7    9.28    1.80
  -4 -11   8  101.29    5.59
   4 -11  -8  103.46    5.67
  -4 -11   8  102.18    4.83
  -4 -11   8  102.16    5.15
  -4 -11   9   10.82    2.30
  -4 -11   9   12.89    2.09
  -4 -11   9    9.85    2.06
   4 -11  -9   10.80    2.48
  -4 -11  10   33.97    3.43
   4 -11 -10   35.84    3.76
  -4 -11  10   35.43    3.43
  -4 -11  10   36.23    3.11
  -4 -11  11  123.55    5.87
   4 -11 -11  120.63    6.41
  -4 -11  11  117.22    5.89
  -4 -11  11  125.81    5.56
  -4 -11  12  182.02    6.91
  -4 -11  12  188.71    6.87
   4 -11 -12  177.02    7.72
  -4 -11  12  173.21    7.09
  -4 -11  13   13.26    2.17
   4 -11 -13   10.95    2.59
  -4 -11  13   12.37    2.17
   4 -11 -14   22.97    3.33
  -4 -11  14   23.67    2.74
   4 -11 -15    5.30    2.37
  -4 -11  15    6.74    1.83
  -4 -11  16   12.65    2.06
   4 -11 -16   16.45    2.80
   4 -11 -17   27.23    3.17
  -4 -11  17   24.13    2.52
  -4 -11  18    0.20    1.20
   4 -11 -18    0.74    1.74
  -4 -11  18    1.11    1.15
  -4 -11  19   17.69    1.89
  -4 -11  19   10.89    1.59
   4 -11 -19   20.65    2.48
  -4 -11  20    1.48    0.93
  -4 -11  20    1.91    0.93
   4 -11 -20    1.56    1.35
   4 -11 -21   64.99    3.04
  -4 -11  21   61.12    2.50
   4 -11 -22    2.33    0.76
  -4  12  21   15.98    1.33
   4 -12  20   11.09    1.13
  -4  12  20   17.17    1.74
   4 -12  19   13.52    1.43
  -4  12  19   12.32    1.76
   4 -12  18   13.89    1.59
  -4 -12 -18   12.39    1.65
  -4  12  18   13.78    2.04
   4 -12  17   21.58    1.83
  -4 -12 -17   24.28    2.48
   4 -12  17   25.47    2.11
  -4  12  17   25.60    2.76
   4 -12  16    9.19    1.59
   4 -12  16    8.91    1.56
  -4 -12 -16   10.00    2.04
  -4  12  16    9.04    2.09
  -4 -12 -15   37.43    3.50
   4 -12  15   36.04    2.67
  -4  12  15   38.23    3.59
   4 -12  14   20.08    2.13
  -4  12  14   23.17    3.06
  -4 -12 -14   28.26    3.30
   4 -12  13    3.20    1.37
   4 -12  13    5.69    2.20
  -4 -12 -13    2.98    2.13
  -4  12  13    3.78    1.93
  -4 -12 -12   16.74    3.04
   4 -12  12   14.56    1.91
   4 -12  12   18.11    2.85
  -4  12  12   11.54    2.41
  -4 -12 -11   76.71    5.28
   4 -12  11   77.10    3.83
  -4  12  11   71.55    4.96
   4 -12  11   72.42    4.93
  -4 -12 -10   17.67    3.20
   4 -12  10   18.43    2.78
  -4  12  10   14.11    2.54
  -4 -12  -9    0.85    2.04
   4 -12   9    0.43    1.22
   4 -12   9   -0.46    1.67
  -4  12   9   -0.13    1.65
  -4 -12  -8   95.81    6.00
   4 -12   8  103.09    5.00
  -4  12   8  100.14    5.59
   4 -12   8   97.75    5.59
   4 -12   7  172.36    6.59
  -4 -12  -7  183.43    7.98
  -4  12   7  183.99    7.37
   4 -12   7  195.21    7.72
   4 -12   7  174.26    7.28
  -4 -12  -6   73.86    5.17
   4 -12   6   71.60    4.80
   4 -12   6   74.55    4.89
  -4  12   6   67.40    4.50
  -4 -12  -5   89.77    5.56
   4 -12   5   90.25    5.33
   4 -12   5   84.81    5.11
  -4  12   5   87.64    4.98
  -4 -12  -4   22.91    3.11
   4 -12   4   20.26    2.85
   4 -12   4   21.21    2.76
  -4  12   4   21.47    2.59
  -4  12   3  198.75    7.02
   4 -12   3  209.03    7.87
   4 -12   3  202.71    7.54
  -4 -12  -3  207.55    8.11
   4 -12   2  110.85    5.59
  -4 -12  -2  109.29    5.87
   4 -12   2  106.29    5.67
  -4 -12  -1  148.00    6.48
  -4 -12  -1  139.61    6.48
  -4 -12  -1  148.46    5.98
   4 -12   1  143.11    6.33
  -4 -12   0    7.09    2.13
  -4 -12   0    5.61    2.02
  -4 -12   0    3.39    1.43
   4 -12   0    2.98    1.56
  -4 -12   1  149.41    6.78
  -4 -12   1  133.78    6.35
  -4 -12   1  153.69    6.06
   4 -12  -1  149.11    6.50
  -4 -12   2  112.59    6.02
   4 -12  -2  114.42    5.74
  -4 -12   2  106.22    5.09
  -4 -12   3  207.84    8.11
  -4 -12   3  205.51    7.11
  -4 -12   4   25.10    3.33
  -4 -12   4   23.89    2.72
  -4 -12   5   77.36    5.17
   4 -12  -5   82.57    4.69
  -4 -12   5   85.01    4.74
  -4 -12   6   51.84    4.35
   4 -12  -6   61.27    4.22
  -4 -12   6   49.21    3.78
  -4 -12   7  175.71    7.54
  -4 -12   7  190.32    6.28
   4 -12  -7  197.86    7.54
  -4 -12   7  200.82    7.22
   4 -12  -7  191.60    7.06
  -4 -12   8  113.87    5.50
  -4 -12   8  109.42    6.00
  -4 -12   8  115.85    4.98
   4 -12  -8  111.50    5.85
   4 -12  -8  120.00    5.41
   4 -12  -9    1.07    1.65
  -4 -12   9    0.24    1.78
  -4 -12   9   -0.57    1.28
  -4 -12   9    1.33    1.56
   4 -12  -9   -0.22    1.28
  -4 -12  10   14.43    2.74
  -4 -12  10   11.26    1.87
  -4 -12  10   13.72    2.35
   4 -12 -10   14.30    2.65
   4 -12 -11   77.51    5.26
  -4 -12  11   88.53    4.52
  -4 -12  11   76.58    4.74
  -4 -12  11   81.20    4.91
  -4 -12  12   11.50    2.28
  -4 -12  12   11.19    1.96
   4 -12 -12    8.19    2.48
   4 -12 -13    1.30    1.91
  -4 -12  13    1.78    1.39
  -4 -12  14   20.32    2.24
   4 -12 -14   23.95    3.24
   4 -12 -15   31.82    3.50
  -4 -12  15   32.19    2.70
  -4 -12  16    7.72    1.50
   4 -12 -16    8.96    2.41
   4 -12 -17   25.00    2.89
  -4 -12  17   23.93    2.11
  -4 -12  18   16.98    1.63
   4 -12 -18   17.21    2.33
   4 -12 -19   11.41    1.80
  -4 -12  19    8.46    1.11
   4 -12 -20   14.32    1.59
  -4 -12  20    4.35    0.70
   4 -12 -21   17.24    1.35
  -4  13  19    0.76    0.74
  -4 -13 -18    0.70    0.59
  -4  13  18   -0.30    0.93
   4 -13  17    1.22    0.72
   4 -13  17   -0.26    0.39
  -4 -13 -17    2.87    1.24
  -4  13  17    3.37    1.35
  -4 -13 -16    3.76    1.52
   4 -13  16    5.33    1.17
   4 -13  16    0.48    0.41
  -4  13  16    4.87    1.52
   4 -13  15   32.63    2.54
  -4 -13 -15   34.28    3.11
  -4  13  15   32.73    2.96
  -4 -13 -14    0.91    1.76
  -4  13  14    0.22    1.46
   4 -13  13   21.97    2.80
  -4  13  13   23.13    2.76
  -4 -13 -13   24.30    3.06
   4 -13  12   38.30    3.59
  -4 -13 -12   38.32    3.93
  -4  13  12   38.73    3.50
  -4 -13 -11  156.41    7.17
   4 -13  11  138.37    6.41
  -4  13  11  141.26    6.37
  -4 -13 -10   93.68    5.91
   4 -13  10   93.64    5.33
  -4  13  10   89.51    5.13
  -4 -13  -9  136.48    7.00
   4 -13   9  141.28    5.48
   4 -13   9  136.54    6.48
  -4  13   9  138.96    6.35
   4 -13   8    3.85    1.83
   4 -13   8    7.32    1.80
  -4 -13  -8    8.24    2.50
  -4  13   8    8.26    2.04
   4 -13   7   15.95    2.59
  -4 -13  -7   12.04    2.85
   4 -13   7   14.48    2.48
   4 -13   7   13.65    2.22
  -4  13   7   13.80    2.30
  -4 -13  -6  151.67    7.35
   4 -13   6  143.61    6.30
  -4  13   6  148.15    6.37
   4 -13   6  151.35    6.78
   4 -13   6  146.52    6.65
  -4 -13  -5    9.46    2.76
   4 -13   5    6.33    2.02
   4 -13   5    8.54    2.22
   4 -13   5    6.41    1.91
  -4  13   5    8.93    1.93
  -4 -13  -4   20.93    3.17
   4 -13   4   29.32    3.39
   4 -13   4   21.84    2.80
   4 -13   4   25.24    3.00
  -4  13   4   26.60    2.76
  -4 -13  -3   98.01    5.85
   4 -13   3   97.90    5.52
  -4 -13  -3   97.85    5.04
   4 -13   3  101.01    5.50
   4 -13   3   92.44    5.35
  -4 -13  -2   23.84    3.24
   4 -13   2   18.87    2.65
  -4 -13  -2   20.93    2.56
   4 -13   2   19.93    2.78
  -4 -13  -1   21.50    2.59
   4 -13   1   20.45    2.89
   4 -13   1   15.93    2.52
  -4 -13  -1   16.76    2.87
  -4 -13   0  110.96    5.89
  -4 -13   0   91.36    5.50
  -4 -13   0  110.44    5.26
   4 -13   0  111.92    5.67
  -4 -13   1   22.89    3.28
  -4 -13   1   24.41    2.76
   4 -13  -1   20.15    2.74
   4 -13  -2   24.50    2.96
  -4 -13   2   25.69    2.78
  -4 -13   2   26.06    3.37
  -4 -13   3   92.49    5.74
   4 -13  -3  100.66    5.56
  -4 -13   3   92.27    4.93
   4 -13  -3  105.59    5.54
  -4 -13   4   22.69    3.26
  -4 -13   4   27.78    3.00
   4 -13  -4   18.65    2.80
   4 -13  -4   16.87    2.59
  -4 -13   5   10.17    2.67
  -4 -13   5   10.61    2.09
   4 -13  -5    7.19    2.09
   4 -13  -5    7.69    1.89
   4 -13  -6  162.87    6.59
   4 -13  -6  161.04    6.65
  -4 -13   6  156.19    6.37
  -4 -13   6  144.15    6.98
  -4 -13   7   12.32    2.65
   4 -13  -7   12.45    2.28
  -4 -13   7   10.65    2.04
   4 -13  -7   11.89    2.24
  -4 -13   8   10.50    2.61
  -4 -13   8   13.15    2.37
   4 -13  -8    8.41    1.91
   4 -13  -8    9.76    2.28
  -4 -13   9  131.78    6.37
   4 -13  -9  131.37    6.26
  -4 -13   9  131.15    5.91
   4 -13  -9  126.52    5.30
  -4 -13  10   86.96    5.17
   4 -13 -10   85.27    5.17
  -4 -13  10   89.94    4.98
  -4 -13  11  162.37    5.37
   4 -13 -11  159.91    6.89
  -4 -13  11  154.93    6.30
  -4 -13  12   38.17    2.70
   4 -13 -12   38.95    3.72
  -4 -13  13   30.23    2.30
   4 -13 -13   27.65    3.22
  -4 -13  14   -0.11    0.89
   4 -13 -14    1.04    1.89
  -4 -13  15   41.21    2.41
   4 -13 -15   41.88    3.48
   4 -13 -16    7.89    1.89
  -4 -13  16   -0.20    0.54
   4 -13 -17    1.93    1.46
  -4 -13  17   -0.67    0.41
   4 -13 -18   -1.30    1.20
   4 -13 -19    2.70    0.98
  -4  14  17    8.32    1.15
   4 -14  16   28.78    1.78
  -4 -14 -16   31.52    2.28
  -4  14  16   30.54    2.17
   4 -14  15   14.89    1.63
  -4 -14 -15   17.63    2.15
  -4  14  15   14.00    1.76
   4 -14  14   42.78    2.78
  -4 -14 -14   47.82    3.41
  -4  14  14   41.95    2.91
   4 -14  13   22.37    2.37
  -4 -14 -13   24.63    2.89
  -4  14  13   21.61    2.33
  -4 -14 -12   35.08    3.43
   4 -14  12   37.89    3.26
  -4  14  12   33.45    2.87
  -4 -14 -11   17.48    2.93
   4 -14  11   16.17    2.50
  -4  14  11   14.95    2.24
  -4 -14 -10   37.23    3.85
  -4  14  10   35.58    3.09
   4 -14  10   38.60    3.48
   4 -14   9   21.63    2.76
  -4 -14  -9   25.06    3.43
   4 -14   9   28.84    2.48
  -4  14   9   22.13    2.54
  -4 -14  -8   12.26    2.72
   4 -14   8   11.37    2.39
   4 -14   8   17.56    2.41
  -4  14   8   13.06    2.15
   4 -14   7    6.93    2.04
   4 -14   7    8.22    1.89
  -4  14   7    7.67    1.59
  -4 -14  -7    7.63    2.56
   4 -14   6    3.78    1.80
   4 -14   6    3.35    1.98
  -4 -14  -6    5.33    1.74
  -4 -14  -6    1.63    2.15
   4 -14   6    3.50    1.76
  -4  14   6    2.85    1.37
  -4 -14  -5   45.62    3.41
   4 -14   5   54.40    4.04
  -4 -14  -5   54.19    4.52
   4 -14   5   47.25    4.04
   4 -14   5   51.86    4.04
  -4  14   5   47.73    3.37
   4 -14   4   12.82    2.52
  -4 -14  -4   11.35    2.65
  -4 -14  -4   11.37    2.02
   4 -14   4   10.22    2.28
   4 -14   4   12.32    2.50
  -4 -14  -3  186.34    7.69
   4 -14   3  179.32    7.43
  -4 -14  -3  184.97    6.69
   4 -14   3  190.86    7.50
   4 -14   3  189.25    7.32
  -4 -14  -2   69.95    4.83
  -4 -14  -2   72.68    4.33
   4 -14   2   66.19    4.74
   4 -14   2   65.66    4.69
   4 -14   2   70.03    4.56
  -4 -14  -1   39.80    3.83
  -4 -14  -1   46.23    3.48
   4 -14   1   41.36    3.87
   4 -14   1   48.08    3.96
   4 -14   1   43.28    4.06
  -4 -14   0  183.12    6.69
   4 -14   0  173.69    7.35
   4 -14   0  174.71    7.41
   4 -14   0  192.75    7.32
   4 -14  -1   39.86    3.78
   4 -14  -1   42.47    4.02
   4 -14  -1   39.99    3.48
  -4 -14   1   35.36    3.20
   4 -14  -2   72.79    4.93
   4 -14  -2   71.25    4.63
  -4 -14   2   74.03    4.39
  -4 -14   3  193.10    7.89
  -4 -14   3  187.51    6.76
   4 -14  -3  195.54    7.63
   4 -14  -3  208.12    7.63
  -4 -14   4   12.17    2.78
  -4 -14   4   13.87    2.22
   4 -14  -4   11.43    2.48
   4 -14  -4   13.61    2.37
  -4 -14   5   40.45    4.15
  -4 -14   5   38.62    3.30
   4 -14  -5   46.54    3.80
   4 -14  -5   50.47    4.02
  -4 -14   6    4.50    2.30
   4 -14  -6    4.46    1.61
   4 -14  -6    2.91    1.80
  -4 -14   6    3.83    1.56
   4 -14  -6    2.30    1.65
  -4 -14   7    9.93    2.59
  -4 -14   7   10.80    2.11
   4 -14  -7   11.95    2.17
   4 -14  -7   10.67    2.13
   4 -14  -7   10.85    2.20
   4 -14  -8   13.98    2.28
   4 -14  -8   16.43    2.30
  -4 -14   8   12.56    2.17
   4 -14  -8   17.17    2.43
  -4 -14   9   20.30    2.43
   4 -14  -9   24.56    2.91
   4 -14  -9   27.71    2.48
   4 -14 -10   32.52    3.13
  -4 -14  10   34.10    2.96
   4 -14 -11   15.11    2.35
   4 -14 -12   36.02    3.26
   4 -14 -13   20.19    2.50
   4 -14 -14   44.45    3.24
   4 -14 -15   13.50    1.98
   4 -14 -16   26.52    2.30
   4 -14 -16   25.89    2.00
   4 -14 -17    7.46    1.33
   4 -14 -17    6.96    0.98
   4 -14 -18    7.22    1.02
  -4  15  15   24.54    1.52
   4 -15  15   25.93    1.50
   4 -15  14    1.17    0.83
  -4  15  14    1.13    0.70
   4 -15  13   30.97    2.26
  -4 -15 -13   30.73    2.56
  -4  15  13   29.58    2.06
   4 -15  12   -0.26    1.20
  -4 -15 -12    2.41    1.65
  -4  15  12    0.89    1.00
   4 -15  11    9.54    1.80
  -4 -15 -11    8.52    2.09
   4 -15  11    5.93    1.65
  -4  15  11    6.76    1.33
   4 -15  10    5.15    1.72
   4 -15  10    7.02    1.85
  -4  15  10    5.39    1.35
  -4 -15 -10    7.50    2.20
   4 -15   9   40.86    3.30
  -4 -15  -9   40.41    3.59
  -4  15   9   35.28    2.61
   4 -15   9   36.76    3.17
   4 -15   9   41.36    2.61
  -4 -15  -8   18.24    2.85
   4 -15   8   19.41    2.17
   4 -15   8   16.71    2.41
  -4  15   8   15.43    1.91
  -4 -15  -7    5.13    2.20
   4 -15   7    6.50    1.61
   4 -15   7    7.63    2.02
  -4 -15  -6   17.28    2.80
   4 -15   6   18.87    2.41
   4 -15   6   17.19    2.52
   4 -15   5   24.17    2.83
  -4 -15  -5   25.37    3.15
   4 -15   5   26.93    3.04
  -4 -15  -5   23.54    2.30
  -4 -15  -4    4.20    2.11
   4 -15   4    1.72    1.65
   4 -15   4    0.80    1.59
   4 -15   4    1.98    1.78
  -4 -15  -4    1.41    1.11
   4 -15   3   40.21    3.65
  -4 -15  -3   42.47    3.15
   4 -15   3   45.38    3.80
   4 -15   3   44.10    3.65
   4 -15   2  137.78    5.78
  -4 -15  -2  132.74    5.37
   4 -15   2  141.17    6.33
   4 -15   2  135.11    6.17
   4 -15   2  134.24    5.93
   4 -15   1   12.61    2.13
  -4 -15  -1    9.48    1.80
   4 -15   1    9.46    2.35
   4 -15   1    8.48    2.11
   4 -15   1    9.13    2.35
   4 -15   0   41.65    3.24
  -4 -15   0   40.34    3.15
   4 -15   0   39.58    3.67
   4 -15   0   39.15    3.67
   4 -15   0   44.82    3.59
   4 -15  -1    7.76    1.72
   4 -15  -1    8.17    2.22
   4 -15  -1   10.80    2.74
   4 -15  -1    8.96    2.00
  -4 -15   1   12.43    2.02
   4 -15  -2  147.67    6.52
   4 -15  -2  143.17    6.37
  -4 -15   2  133.70    5.46
   4 -15  -2  138.02    5.96
   4 -15  -3   44.86    3.56
   4 -15  -3   44.28    3.85
  -4 -15   3   35.65    2.98
   4 -15  -3   40.30    3.67
   4 -15  -4    0.22    1.78
  -4 -15   4    0.70    1.30
   4 -15  -4    1.24    1.43
  -4 -15   5   24.84    2.61
   4 -15  -5   20.82    2.67
   4 -15  -5   22.63    2.63
   4 -15  -6   13.04    1.87
  -4 -15   6   14.17    2.09
   4 -15  -6   12.15    2.13
   4 -15  -6   13.93    2.20
  -4 -15   7    7.50    1.63
   4 -15  -7    5.83    1.65
   4 -15  -7    6.65    1.65
   4 -15  -7    6.09    1.63
   4 -15  -8   20.34    2.28
   4 -15  -8   19.78    2.43
   4 -15  -8   20.63    2.17
  -4 -15   8   19.65    2.30
   4 -15  -9   39.62    2.98
   4 -15  -9   38.56    3.09
  -4 -15   9   36.78    2.78
   4 -15  -9   35.95    2.43
   4 -15 -10    2.98    1.30
   4 -15 -10    3.09    1.39
   4 -15 -11   10.93    1.80
   4 -15 -11   12.56    1.85
   4 -15 -12   -0.52    1.00
   4 -15 -12   -1.00    1.24
   4 -15 -13   28.69    2.35
   4 -15 -13   28.91    2.13
   4 -15 -14    2.70    1.09
   4 -15 -14    3.22    0.93
   4 -15 -15   42.88    2.33
   4 -15 -15   28.21    1.59
   4 -15 -16   10.50    1.13
   4 -16  13    3.26    0.72
   4 -16  12   11.89    1.37
   4 -16  11    0.37    0.96
   4 -16  10    0.61    1.09
   4 -16  10    1.63    1.15
   4 -16   9    7.89    1.63
   4 -16   9    7.76    1.59
   4 -16   8   45.32    3.06
   4 -16   8   42.60    3.00
   4 -16   7   18.89    2.28
   4 -16   7   16.98    2.20
   4 -16   7   22.26    2.09
   4 -16   6    1.48    1.54
   4 -16   6    3.33    1.59
   4 -16   6    2.13    1.30
   4 -16   5   86.90    4.30
   4 -16   5   96.27    4.39
   4 -16   5   93.33    4.56
   4 -16   4    6.52    1.74
   4 -16   4    4.76    1.65
   4 -16   3    3.72    1.52
   4 -16   3    2.26    1.56
   4 -16   3    3.28    1.80
   4 -16   2   33.93    2.67
  -4 -16  -2   34.41    2.48
   4 -16   2   37.12    3.24
   4 -16   2   38.36    3.28
   4 -16   2   34.54    2.89
   4 -16   1   26.78    2.41
   4 -16   1   27.67    3.02
  -4 -16  -1   26.58    2.28
   4 -16   1   28.17    2.93
   4 -16   1   30.32    2.74
   4 -16   0   93.09    3.98
  -4 -16   0   94.42    4.04
   4 -16   0  101.18    5.00
   4 -16   0   88.38    4.72
   4 -16   0   90.77    4.46
  -4 -16   1   31.65    2.48
   4 -16  -1   33.80    3.15
   4 -16  -1   37.56    3.33
   4 -16  -1   35.28    2.89
   4 -16  -2   39.32    3.30
   4 -16  -2   38.06    3.24
   4 -16  -2   39.93    3.06
  -4 -16   2   36.67    2.65
   4 -16  -3    1.39    1.26
  -4 -16   3    0.96    1.07
   4 -16  -3   -0.22    1.65
   4 -16  -3    1.17    1.59
  -4 -16   4    8.78    1.65
   4 -16  -4    5.43    1.78
   4 -16  -4    6.00    1.72
   4 -16  -4    5.93    1.52
  -4 -16   5   84.25    3.80
   4 -16  -5   88.49    4.65
   4 -16  -5   92.14    4.30
   4 -16  -5   88.57    4.17
  -4 -16   6    2.09    1.13
   4 -16  -6   -0.83    1.59
   4 -16  -6    0.09    1.22
   4 -16  -6    0.85    1.30
  -4 -16   7   13.41    1.72
   4 -16  -7   15.48    2.22
   4 -16  -7   18.74    2.06
   4 -16  -8   39.30    2.35
   4 -16  -8   44.82    3.20
   4 -16  -8   42.47    2.72
   4 -16  -9    5.85    1.15
   4 -16  -9    8.28    1.43
   4 -16 -10    2.04    0.96
   4 -16 -10    0.07    0.80
   4 -16 -11    1.39    0.78
   4 -16 -11    0.93    0.85
   4 -16 -12    9.24    0.98
   4 -16 -12    6.87    0.98
   4 -16 -13    2.41    0.89
   4 -17  10    7.13    1.00
   4 -17   9   35.21    2.02
   4 -17   8    5.85    1.13
   4 -17   8    6.28    1.20
   4 -17   7    2.20    1.09
   4 -17   7    0.28    0.93
   4 -17   6    1.48    1.00
   4 -17   6    2.15    1.11
   4 -17   5   14.04    1.63
   4 -17   5   12.04    1.67
   4 -17   4   10.19    1.52
   4 -17   4    8.09    1.56
   4 -17   3   13.08    1.59
   4 -17   3   14.80    1.87
   4 -17   3   11.87    1.72
   4 -17   2    5.02    1.13
   4 -17   2    5.35    1.50
   4 -17   2    4.37    1.46
   4 -17   1    0.85    0.48
   4 -17   1    3.96    1.43
   4 -17   1    4.67    1.54
   4 -17   0   38.82    2.83
   4 -17   0   35.97    2.83
   4 -17  -1    5.02    1.22
   4 -17  -1    2.91    1.33
   4 -17  -1    5.63    1.61
   4 -17  -2    5.06    1.20
   4 -17  -2    5.33    1.52
   4 -17  -2    5.98    1.54
   4 -17  -3   14.82    1.96
   4 -17  -3   13.26    1.56
   4 -17  -4    9.19    1.70
   4 -17  -4    9.82    1.39
   4 -17  -5   13.87    1.50
   4 -17  -5   15.41    1.87
   4 -17  -6    1.65    0.89
   4 -17  -6    0.96    1.04
   4 -17  -7    0.72    0.96
   4 -17  -7    1.72    0.70
   4 -17  -8    4.69    1.17
   4 -17  -8    2.83    0.63
   4 -17  -9   28.37    1.93
   4 -17 -10    3.78    0.87
   4 -18   4    2.65    0.74
   4 -18   3   11.32    1.20
   4 -18   2   18.21    1.50
   4 -18   1    7.24    1.11
   4 -18   0    4.87    1.00
   4 -18  -1    7.04    1.11
   4 -18  -2   20.19    1.59
   4 -18  -3   11.41    1.26
   4 -18  -4    3.24    0.80
   4 -18  -5    4.13    0.83
  -5   0   0    5.13    3.63
  -5   0   0    1.74    4.15
  -5   0  -1  614.77   17.65
  -5   0   1  607.67   19.19
  -5   0   1  603.84   21.00
  -5   0  -1  625.75   21.63
  -5   0  -2  291.04   11.35
  -5   0   2  284.54   14.37
  -5   0   2  305.52   14.35
  -5   0  -2  281.07   14.87
  -5   0  -3   52.69    4.46
  -5   0   3   54.27    6.98
  -5   0   3   47.43    6.06
  -5   0  -3   55.64    7.04
  -5   0  -4   92.07    8.85
  -5   0   4  104.74    9.41
  -5   0  -4  101.11    5.43
  -5   0   4   98.75    8.50
  -5   0  -5  120.22   10.11
  -5   0   5  114.55   10.15
  -5   0  -5  121.07    4.80
  -5   0   5  113.92    8.87
  -5   0   6   42.62    7.13
  -5   0  -6   40.75    6.50
  -5   0   6   40.93    5.50
  -5   0   7 1796.09   33.49
  -5   0  -7 1845.48   39.60
  -5   0   7 1834.96   42.04
  -5   0   8  240.64   11.80
  -5   0  -8  230.68   14.19
  -5   0   8  235.42   15.87
  -5   0   9    5.85    4.33
  -5   0 -10  390.16   22.76
  -5   0  10  408.74   22.11
  -5   0 -11  114.79   13.52
  -5   0  11  111.05   12.02
  -5   0 -12   -6.15    6.11
  -5   0  12   -0.30    2.96
  -5   0 -13  420.09   27.26
  -5   0  13  456.73   25.00
  -5   0 -14    8.52    5.37
  -5   0  14    8.22    4.67
  -5   0 -15  233.09   22.15
  -5   0  15  266.13   19.63
  -5   0  16   49.84    3.74
  -5   0 -16   48.10   10.19
  -5   0  16   48.75    3.96
  -5   0  16   47.73    8.52
  -5   0  17    4.35    1.76
  -5   0  17   10.13    2.26
  -5   0  18  347.19   10.00
  -5   0  18  350.10   10.54
  -5   0  19    2.13    1.67
  -5   0  19    2.80    1.89
  -5   0 -19    3.33    2.33
  -5   0  20   14.37    2.48
  -5   0  20   11.78    2.54
  -5   0 -20   14.04    3.13
  -5   0  21   37.69    3.80
  -5   0 -21   34.10    4.04
  -5   0  21   34.67    3.30
  -5   0  22    5.76    1.87
  -5   0  22    3.70    1.98
   5   0  22    5.39    2.04
  -5   0 -22    4.78    2.41
   5   0  23   22.00    2.76
  -5   0  23   21.87    2.91
  -5   0 -23   23.17    3.24
  -5   0  23   19.28    2.54
  -5   0  24   13.02    1.96
   5   0  24   11.54    2.11
  -5   0 -24   13.41    2.43
  -5   0  24   12.85    2.24
  -5   0  25   17.43    2.24
   5   0  25   19.45    2.30
  -5   0 -25   16.56    2.17
  -5   0  25   18.21    1.91
  -5   0  26    5.56    1.07
   5   0  26    6.13    1.39
  -5   0 -26    4.09    1.11
  -5   0  26    5.43    1.37
   5   0  27   23.54    1.63
  -5   0  27   30.00    1.93
   5  -1  27    7.91    1.17
   5  -1  26    1.00    1.09
  -5  -1 -26    2.17    1.26
  -5   1  26    2.09    1.15
  -5   1  25    5.80    1.20
   5  -1  25    9.09    1.89
  -5  -1 -25    7.91    1.87
  -5   1  25   10.30    1.80
  -5   1  24   24.45    2.70
   5  -1  24   22.95    2.74
  -5  -1 -24   22.95    2.96
  -5   1  24   21.56    2.22
  -5   1  23   44.56    3.67
  -5  -1 -23   49.97    4.43
   5  -1  23   44.01    3.70
  -5   1  23   49.97    3.43
  -5   1  22    3.89    1.61
  -5   1  22    3.02    1.96
   5  -1  22    3.37    2.06
   5  -1  22    4.67    1.50
  -5  -1 -22    3.46    2.26
  -5   1  21  105.51    5.85
  -5  -1 -21  109.27    6.69
   5  -1  21  111.70    4.85
  -5   1  21  111.27    5.48
  -5  -1 -20   37.12    4.50
   5  -1  20   31.95    2.85
  -5   1  20   35.21    3.67
  -5   1  20   30.60    3.22
  -5   1  19  266.18    9.17
   5  -1  19  274.46    7.67
  -5  -1 -19  282.89   10.54
  -5   1  19  270.89    8.74
  -5   1  18  105.77    5.54
  -5   1  18  101.55    5.74
   5  -1  18  100.55    4.69
  -5  -1 -18  105.55    6.65
  -5   1  17    5.02    1.83
   5  -1  17    5.56    1.52
  -5   1  17    7.17    2.13
  -5   1  16  188.06    6.98
  -5   1  16  200.19    7.52
  -5   1  16  166.87   15.80
   5  -1  16  175.67    5.85
  -5   1  15   14.50    5.48
  -5   1  14    5.24    3.35
  -5  -1 -14    2.24    4.41
  -5  -1 -13  167.76   17.82
  -5   1  13  186.75   16.00
  -5   1  12   72.12   10.15
  -5   1  11  100.59   11.52
  -5   1  10  208.64   15.74
  -5   1   9    3.39    3.41
  -5   1   8   12.35    5.00
  -5   1   8   16.28    3.65
  -5  -1  -8   14.19    3.15
  -5   1   7  105.59    8.50
  -5  -1  -7   99.70    7.17
  -5   1   7   97.55   10.43
  -5   1   6  276.81   16.52
  -5  -1  -6  273.74   11.61
  -5   1   6  273.31   13.67
  -5   1   5  723.17   25.39
  -5   1   5  718.37   22.37
  -5  -1  -5  725.04   19.11
  -5  -1  -5  706.33   24.89
  -5  -1  -5  733.10   11.32
  -5   1   4  394.03   16.89
  -5  -1  -4  420.22   10.82
  -5  -1  -4  389.61   18.34
  -5  -1  -4  418.17   14.65
  -5  -1  -3 1046.03   29.50
  -5  -1  -3 1060.47   19.69
  -5   1   3 1042.75   27.63
  -5  -1  -2  103.20    6.72
  -5  -1  -2  111.66    9.82
  -5  -1  -2  113.35    8.30
  -5   1   2   97.18    8.91
  -5  -1  -1  587.39   21.43
  -5  -1  -1  579.91   16.76
  -5   1   1  555.41   20.54
  -5  -1   0  448.89   15.93
  -5  -1   0  449.78   18.76
  -5   1   0  444.37   18.54
  -5  -1   1  602.78   21.30
  -5   1  -1  596.84   21.39
  -5  -1   1  601.73   19.13
  -5  -1   2   91.86    8.67
  -5  -1   2   88.60    8.30
  -5   1  -2   98.46    9.15
  -5  -1   3  984.28   26.71
  -5  -1   3  984.76   27.00
  -5   1  -3 1012.39   28.19
  -5  -1   4  444.30   17.65
  -5   1  -4  422.65   18.50
  -5  -1   4  435.43   18.67
  -5  -1   5  680.59   21.45
  -5  -1   5  662.79   23.80
  -5   1  -5  656.64   23.11
  -5  -1   6  292.02   16.65
  -5  -1   6  297.48   13.95
  -5   1  -6  291.95   15.56
  -5   1  -7   98.81    9.41
  -5  -1   7  102.61   10.65
  -5  -1   8   18.19    5.52
  -5   1  -8   19.50    4.80
  -5  -1   9    5.46    4.50
  -5   1  -9   -3.20    4.87
  -5   1  -9    6.91    3.04
  -5   1 -10  221.75   16.91
  -5   1 -10  258.76   15.11
  -5  -1  10  228.99   16.82
  -5   1 -11   96.88   11.85
  -5  -1  11  107.79   11.78
  -5   1 -12   70.03   10.74
  -5  -1  12   78.75   10.56
  -5   1 -13  165.32   16.76
  -5  -1  13  185.91   16.28
  -5   1 -14    7.28    6.37
  -5  -1  14    0.76    3.15
  -5   1 -15   23.02    7.87
  -5  -1  15   20.82    6.11
  -5  -1  16  179.28    7.09
  -5   1 -16  160.71   18.74
  -5  -1  16  187.32    7.46
  -5  -1  16  183.10   16.74
  -5  -1  17   12.80    2.39
  -5  -1  17   14.19    2.61
  -5  -1  18  101.98    5.87
  -5  -1  18  104.83    5.78
  -5  -1  19  259.85    8.87
  -5  -1  19  253.77    9.15
  -5   1 -19  253.98    9.80
  -5  -1  20   38.19    3.74
  -5   1 -20   38.19    4.26
  -5  -1  20   37.34    3.83
  -5  -1  21  125.68    6.11
  -5  -1  21  131.11    6.56
   5   1  21  131.91    6.22
  -5   1 -21  137.07    7.13
  -5  -1  22    4.09    1.98
  -5   1 -22    4.13    2.15
  -5  -1  22    2.59    2.04
   5   1  22    4.74    1.85
  -5  -1  23   45.34    3.87
   5   1  23   45.71    3.65
  -5   1 -23   52.58    4.17
  -5  -1  23   50.10    3.65
   5   1  24   18.04    2.33
  -5  -1  24   17.67    2.59
  -5   1 -24   18.32    2.52
  -5  -1  24   19.48    2.33
  -5  -1  25    5.93    1.48
  -5  -1  25    6.91    1.83
   5   1  25    7.54    1.67
  -5  -1  25    4.00    1.07
  -5   1 -25    6.13    1.48
  -5  -1  26    2.04    0.98
   5   1  26    1.37    0.96
  -5  -1  26    1.07    0.65
  -5  -1  26    1.07    1.09
  -5  -1  27    7.37    1.17
   5  -2  27   14.78    1.46
   5  -2  26   13.93    1.80
  -5   2  26    9.04    1.35
  -5  -2 -26   13.28    1.83
   5  -2  25   14.24    2.02
  -5   2  25   12.35    1.80
  -5  -2 -25   13.41    2.28
  -5   2  24    3.74    1.20
  -5   2  24    4.35    1.63
  -5  -2 -24    1.04    1.80
   5  -2  24    3.89    1.24
   5  -2  24    3.83    1.76
   5  -2  23    9.82    1.72
  -5   2  23    7.96    1.63
  -5  -2 -23    6.63    2.24
  -5   2  23    9.39    2.04
   5  -2  23    8.11    2.17
   5  -2  22   38.86    3.74
  -5   2  22   34.23    3.35
  -5  -2 -22   36.19    4.17
  -5   2  22   34.28    2.96
   5  -2  22   33.49    2.85
  -5  -2 -21   80.07    5.87
  -5   2  21   74.16    4.87
   5  -2  21   73.51    4.20
  -5   2  21   76.08    4.46
  -5   2  20   60.73    4.50
   5  -2  20   74.14    4.28
  -5  -2 -20   63.66    5.37
  -5   2  20   71.42    4.43
   5  -2  19   34.47    3.11
  -5  -2 -19   33.80    4.22
  -5   2  19   32.60    3.35
  -5   2  19   34.23    3.28
  -5  -2 -18   88.27    6.19
  -5   2  18   92.18    5.43
  -5   2  18   84.03    4.80
   5  -2  18   81.49    4.46
   5  -2  17   30.52    2.83
  -5   2  17   30.15    3.17
  -5  -2 -17   31.58    3.85
  -5   2  17   29.95    2.96
  -5   2  16  128.65    5.74
  -5   2  16  131.68   13.98
   5  -2  16  121.22    5.11
  -5   2  16  128.18    6.13
  -5   2  15   39.34    7.96
  -5   2  14  129.87   13.67
  -5   2  13   96.51   11.89
  -5   2  12   27.52    6.87
  -5   2  11  228.05   17.39
  -5   2  10   47.23    8.13
  -5  -2  -9   90.53    7.91
  -5   2   9   98.31    8.17
  -5   2   9   92.09   10.93
  -5   2   8    3.13    4.54
  -5   2   8    2.24    2.00
  -5  -2  -8    2.65    2.37
  -5  -2  -7  286.02   13.74
  -5  -2  -6  564.13   19.04
  -5  -2  -5  835.57   22.84
  -5  -2  -5  825.85   13.50
  -5  -2  -4  789.14   22.28
  -5  -2  -4  803.12   16.45
  -5  -2  -3   40.56    5.54
  -5  -2  -3   39.78    4.30
  -5  -2  -2  891.12   23.97
  -5  -2  -2  850.83   20.19
  -5  -2  -1  207.45   10.91
  -5  -2  -1  236.20   12.89
  -5  -2   0   74.12    8.17
  -5  -2   0   84.10    7.32
   5  -2  -1  192.67    4.93
  -5  -2   1  231.46   12.30
  -5  -2   2  840.50   24.34
  -5  -2   3   42.12    6.37
  -5  -2   4  653.18   23.45
  -5   2  -4  690.92   24.26
  -5  -2   5  820.42   27.19
  -5   2  -5  835.96   26.65
  -5  -2   6  584.11   23.80
  -5   2  -6  595.89   22.52
  -5   2  -7  282.85   15.71
  -5  -2   7  295.80   17.82
  -5   2  -8   -1.96    3.28
  -5  -2   8    2.26    4.11
  -5   2  -8    1.89    2.59
  -5   2  -9  101.53    9.54
  -5   2  -9   93.99    9.95
  -5  -2   9  106.29   11.65
  -5   2 -10   50.38    6.96
  -5   2 -10   43.41    7.63
  -5  -2  10   52.06    8.69
  -5   2 -11  247.74   18.04
  -5  -2  11  249.18   18.26
  -5   2 -12   24.06    6.22
  -5  -2  12   19.89    6.19
  -5   2 -13   83.92   11.76
  -5  -2  13   85.25   11.28
  -5   2 -14   96.79   13.43
  -5  -2  14  115.79   13.30
  -5   2 -15   38.73    9.06
  -5  -2  15   41.02    8.41
  -5  -2  16  139.09    6.52
  -5  -2  16  147.24   15.43
  -5  -2  16  131.09    5.69
   5  -2 -16  165.10   17.93
   5  -2 -17   32.71    8.85
  -5   2 -17   12.59    6.83
  -5  -2  17   27.10    3.22
  -5  -2  18   75.42    5.04
  -5  -2  18   86.29    5.50
  -5  -2  19   31.71    3.59
  -5  -2  19   28.37    3.37
  -5  -2  20   57.01    4.65
  -5  -2  20   62.53    4.63
  -5   2 -20   54.34    4.61
  -5  -2  21   73.23    4.87
  -5   2 -21   74.77    5.22
  -5  -2  21   75.31    5.11
   5   2  21   73.97    4.63
  -5  -2  22   30.76    3.28
  -5  -2  22   34.86    3.65
   5   2  22   31.84    3.09
  -5   2 -22   33.10    3.63
  -5  -2  23    7.28    2.04
   5   2  23    5.17    1.70
  -5  -2  23    5.24    2.09
  -5   2 -23    6.76    1.91
  -5  -2  24    5.33    1.72
   5   2  24    6.63    1.61
  -5  -2  24    5.74    1.93
  -5   2 -24    6.65    1.67
  -5  -2  25   14.37    1.85
  -5  -2  25   14.22    1.63
   5   2  25   11.85    1.61
  -5  -2  25   14.63    2.13
  -5  -2  26    9.39    1.39
   5   2  26    9.87    1.22
  -5  -2  26   10.91    1.24
  -5  -2  26    9.63    1.56
  -5  -2  27   13.48    1.39
   5  -3  27    2.70    0.83
   5  -3  26    1.54    0.65
  -5  -3 -26    3.65    1.35
   5  -3  26    3.00    1.20
  -5   3  25   14.11    1.67
  -5  -3 -25   14.06    2.28
   5  -3  25   15.56    1.63
   5  -3  25   16.69    2.15
   5  -3  24    8.98    2.06
   5  -3  24    9.22    1.56
  -5  -3 -24   12.22    2.50
  -5   3  24   10.11    1.74
  -5  -3 -23    1.48    2.09
   5  -3  23    3.98    1.48
   5  -3  23    2.48    1.74
  -5   3  23    4.46    1.65
  -5   3  22    8.85    1.65
  -5   3  22   10.11    2.11
  -5  -3 -22   12.13    3.09
   5  -3  22    7.69    1.83
   5  -3  22    9.28    2.35
  -5  -3 -21   53.62    5.06
  -5   3  21   51.75    3.98
  -5   3  21   48.54    3.39
   5  -3  21   53.56    3.76
  -5   3  20  109.11    5.74
  -5  -3 -20  112.09    7.02
   5  -3  20  102.79    5.09
  -5   3  20  108.74    5.15
  -5   3  19    7.37    1.87
  -5  -3 -19   11.65    3.15
   5  -3  19    6.78    1.98
  -5   3  19    8.35    2.17
  -5  -3 -18  429.24   12.93
  -5   3  18  415.96   11.02
   5  -3  18  403.66    9.80
  -5   3  18  409.18   10.13
  -5  -3 -17   38.17    4.28
  -5   3  17   31.15    3.26
   5  -3  17   37.47    3.20
  -5   3  17   38.47    3.35
  -5   3  16   54.06    3.93
   5  -3  16   52.43    3.56
  -5  -3 -16   58.99    4.89
  -5   3  16   56.88    3.89
   5  -3  15   24.28    2.56
  -5   3  15   21.45    2.56
  -5  -3 -15   22.54    3.20
  -5   3  14   72.90   10.59
  -5   3  13   51.34    8.93
  -5   3  12   32.17    7.15
  -5   3  11   95.18   11.61
  -5   3  10   53.10    8.61
  -5  -3 -10   58.06    7.24
  -5  -3  -9   93.05    9.17
  -5  -3  -8  111.94    9.98
  -5  -3  -7  206.90   13.00
  -5  -3  -6  775.79   24.69
  -5  -3  -5  121.44    9.89
  -5  -3  -5  119.61    6.37
  -5  -3  -4  125.24    9.85
  -5  -3  -4  122.00    7.24
  -5  -3  -3 1222.85   30.00
  -5  -3  -3 1224.90   24.78
  -5  -3  -2  815.70   24.74
  -5  -3  -2  801.94   21.00
  -5  -3  -1  569.56   20.87
  -5  -3  -1  568.98   18.58
   5  -3   0  188.97    7.52
  -5  -3   0  184.56   11.30
  -5  -3   0  173.10   11.93
  -5  -3   1  527.27   20.80
  -5  -3   1  484.69   18.69
  -5  -3   2  850.13   25.76
  -5  -3   3 1283.52   32.80
  -5  -3   4  124.09   10.95
  -5  -3   5   71.42    9.11
  -5  -3   6  804.61   29.28
  -5  -3   7  222.62   16.15
  -5   3  -7  231.46   14.76
  -5   3  -8   97.42    9.37
  -5  -3   8   99.12   11.19
  -5   3  -8  115.20   10.39
  -5   3  -9   90.70    9.61
  -5   3  -9  101.22    9.67
  -5  -3   9   92.38   11.24
  -5   3 -10   55.38    8.17
  -5  -3  10   58.19    9.26
  -5   3 -10   64.19    7.59
  -5   3 -11   94.01   10.89
  -5  -3  11  104.85   12.39
  -5   3 -12   25.97    6.67
  -5  -3  12   34.91    7.46
  -5   3 -13   32.78    7.80
  -5  -3  13   37.26    8.48
  -5   3 -14   82.88   12.02
  -5  -3  14   78.99   11.43
   5  -3 -15   31.39    7.69
  -5   3 -15    9.15    5.63
  -5  -3  15   21.95    2.43
  -5  -3  15   23.65    6.56
  -5  -3  15   17.21    2.50
   5  -3 -16   51.38   10.02
  -5   3 -16   49.38   10.35
  -5  -3  16   42.28    8.50
  -5  -3  16   60.03    4.46
  -5  -3  16   58.27    3.98
   5  -3 -17   44.08    9.95
  -5  -3  17   34.45    3.61
  -5  -3  17   36.67    3.39
  -5  -3  18  427.04   11.69
  -5  -3  19    6.02    2.28
  -5  -3  19    9.06    2.41
  -5  -3  20  106.94    5.98
  -5  -3  20  109.16    6.11
   5   3  20  112.31    5.37
  -5   3 -20  113.81    6.19
  -5  -3  21   51.84    4.28
  -5  -3  21   51.51    4.30
   5   3  21   49.04    3.59
  -5   3 -21   49.43    4.09
  -5   3 -22    5.11    1.91
  -5  -3  22    8.80    2.26
  -5  -3  22    2.65    1.87
   5   3  22    9.80    1.91
  -5  -3  23    3.39    1.76
  -5  -3  23    3.67    1.93
   5   3  23    2.70    1.22
  -5  -3  24   11.43    2.09
   5   3  24   11.45    1.65
  -5  -3  24   10.80    2.15
  -5  -3  25   13.98    1.87
  -5  -3  25   14.87    2.06
  -5  -3  25   13.65    1.67
  -5  -3  26    1.76    0.98
  -5  -3  26    3.98    0.93
  -5  -3  26    2.26    1.09
  -5  -3  27    3.28    0.85
  -5  -4 -26   18.28    1.93
   5  -4  26   13.19    1.17
   5  -4  26   17.30    1.70
   5  -4  25    7.24    1.52
  -5  -4 -25    8.15    1.93
   5  -4  25    8.87    1.41
   5  -4  24   32.45    2.85
   5  -4  24   35.28    2.63
  -5  -4 -24   37.21    3.56
  -5   4  24   31.06    2.30
  -5   4  23    3.91    1.37
  -5  -4 -23    1.50    2.20
   5  -4  23    1.63    1.39
   5  -4  23    3.06    1.74
   5  -4  22   41.15    3.65
   5  -4  22   44.54    3.43
  -5  -4 -22   45.36    4.50
  -5   4  22   38.10    3.06
  -5   4  21   45.32    3.63
   5  -4  21   46.82    3.61
  -5  -4 -21   44.67    4.69
   5  -4  20   45.99    3.67
  -5  -4 -20   43.88    4.72
  -5   4  20   43.62    3.63
   5  -4  19   14.91    2.43
  -5   4  19   18.45    2.65
  -5  -4 -19   18.61    3.41
  -5   4  18  105.72    5.46
   5  -4  18  116.76    5.48
  -5  -4 -18  107.09    6.74
  -5  -4 -17   88.68    6.13
  -5   4  17   80.34    4.78
   5  -4  17   74.38    4.50
  -5   4  17   78.53    4.41
  -5  -4 -16  234.88    9.35
  -5   4  16  232.23    7.89
   5  -4  16  212.21    7.15
  -5   4  16  223.47    7.19
  -5   4  15  183.49   16.82
   5  -4  15  189.28    6.61
  -5   4  15  182.49    6.78
  -5  -4 -15  204.88    8.48
  -5   4  15  183.23    6.43
  -5   4  14   81.36   11.35
  -5   4  13    4.15    3.59
  -5   4  12   25.93    7.00
  -5   4  11   60.95    9.89
  -5  -4 -11   55.73    7.85
  -5  -4 -10  262.50   16.71
  -5  -4  -9  135.00   12.04
  -5  -4  -8  336.88   18.56
  -5  -4  -7  738.36   27.04
  -5  -4  -6   75.27    8.96
  -5  -4  -5  149.43   12.09
  -5  -4  -4  228.01   14.58
  -5  -4  -4  243.20   11.28
  -5  -4  -3  603.73   23.13
  -5  -4  -3  612.88   19.04
  -5  -4  -2   91.31    9.59
  -5  -4  -2   98.14    8.39
   5  -4   1  240.31   10.80
  -5  -4  -1  225.83   14.41
  -5  -4  -1  228.99   12.98
  -5  -4   0  123.29   10.91
  -5  -4   0  113.50    9.78
   5  -4   0  119.94    6.98
  -5  -4   1  220.88   14.50
  -5  -4   1  232.46   13.85
  -5  -4   2   93.46   10.02
  -5  -4   2   98.38    9.74
  -5  -4   3  524.68   22.41
  -5  -4   4  222.47   15.17
  -5  -4   5  161.54   13.58
  -5  -4   6   71.58    9.74
  -5  -4   7  795.49   31.13
  -5   4  -8  337.62   18.28
  -5  -4   8  338.17   20.95
  -5   4  -9  143.91   11.59
  -5  -4   9  131.78   13.78
  -5   4  -9  168.97   12.80
  -5   4 -10  255.53   16.32
  -5  -4  10  281.24   20.19
  -5   4 -10  270.57   16.00
  -5   4 -11   46.28    7.63
  -5  -4  11   57.58    9.69
   5  -4 -12   28.71    6.96
  -5   4 -12   17.28    5.54
  -5  -4  12   24.87    7.48
  -5   4 -13    8.93    4.80
  -5  -4  13    7.41    4.26
  -5   4 -14   74.01   11.04
  -5  -4  14   88.62   12.43
  -5  -4  15  209.51    7.11
  -5  -4  15  179.52    7.24
  -5  -4  15  188.86   17.71
  -5  -4  16  216.27    8.15
  -5  -4  16  199.08   18.39
  -5  -4  16  209.08    7.39
  -5  -4  17   82.29    5.26
  -5  -4  17   70.12    4.52
  -5  -4  18  116.13    5.72
  -5  -4  18  104.81    5.98
  -5  -4  19   21.74    3.15
  -5  -4  19   23.50    3.30
  -5  -4  20   51.71    4.26
  -5  -4  20   49.71    4.26
  -5  -4  21   38.91    3.78
  -5  -4  21   38.71    3.74
  -5  -4  22   39.32    3.59
  -5  -4  22   34.99    3.50
  -5  -4  23    1.87    1.65
   5  -4 -23    2.17    1.24
  -5  -4  23    1.52    1.56
  -5  -4  24   31.36    2.80
  -5  -4  24   30.89    2.61
  -5  -4  24   32.45    2.83
  -5  -4  25    7.78    1.59
  -5  -4  25    5.76    1.30
  -5  -4  25    6.61    1.52
  -5  -4  26   14.35    1.50
  -5  -4  26   16.00    1.41
  -5  -4  26   15.87    1.56
   5  -5  26    2.33    0.85
   5  -5  26    2.72    0.67
   5  -5  25    2.20    1.13
  -5  -5 -25    1.11    1.41
   5  -5  25    2.11    0.98
   5  -5  24   18.82    2.06
   5  -5  24   15.45    2.17
  -5  -5 -24   17.82    2.63
   5  -5  23   38.45    3.22
   5  -5  23   39.17    3.22
  -5  -5 -23   35.58    3.76
   5  -5  22   17.98    2.61
  -5  -5 -22   17.02    3.33
   5  -5  22   16.74    2.35
  -5   5  22   16.11    1.98
   5  -5  21   19.17    2.61
   5  -5  21   21.58    3.13
  -5  -5 -21   22.50    3.70
   5  -5  20    2.33    1.76
  -5  -5 -20    8.09    3.13
  -5  -5 -19   27.63    3.98
   5  -5  19   21.61    2.83
   5  -5  18  126.65    6.04
  -5  -5 -18  123.94    7.19
   5  -5  17   42.99    3.70
  -5  -5 -17   43.17    4.61
   5  -5  16  144.13    6.04
  -5  -5 -16  148.17    7.54
  -5   5  15   59.51   10.19
  -5  -5 -15   59.80    4.89
   5  -5  15   63.21    4.04
  -5   5  14  139.87   15.04
   5  -5  14  131.41    5.50
  -5  -5 -14  126.81    6.56
  -5   5  13  302.02   22.02
  -5   5  12   60.08   10.39
  -5  -5 -12   47.19    8.09
  -5  -5 -11  332.10   20.87
  -5  -5 -10   31.91    6.80
  -5  -5  -9  106.07   11.78
  -5  -5  -8  546.92   25.84
  -5  -5  -7  245.64   17.17
  -5  -5  -6  148.74   13.08
  -5  -5  -5  530.51   23.87
  -5  -5  -4  120.68    9.19
  -5  -5  -4  113.57   11.22
   5  -5   3  135.72   10.13
  -5  -5  -3  133.68   12.22
  -5  -5  -3  120.44    9.43
   5  -5   2  223.25   12.26
  -5  -5  -2  208.10   14.80
  -5  -5  -2  222.44   12.95
  -5  -5  -1  183.04   13.95
  -5  -5  -1  186.73   12.48
   5  -5   1  195.43   10.80
  -5  -5   0  114.03   11.22
  -5  -5   0  111.77   10.28
  -5  -5   1  154.58   13.02
  -5  -5   1  154.78   12.65
  -5  -5   2  215.71   15.41
  -5  -5   2  224.60   15.37
  -5  -5   3  145.02   12.98
  -5  -5   3  164.91   13.67
  -5  -5   4  121.16   12.02
  -5  -5   5  502.88   24.47
  -5  -5   6  150.67   14.06
  -5  -5   7  225.92   17.48
  -5  -5   8  568.17   28.13
  -5   5  -9  129.07   11.95
  -5  -5   9  107.18   12.74
  -5  -5  10   18.45    5.98
  -5  -5  11  360.84   23.80
  -5  -5  12   72.23   11.22
  -5  -5  13  303.93   22.82
  -5  -5  14  122.94    5.69
  -5  -5  14  122.26    5.33
  -5  -5  15   61.73    3.96
  -5  -5  15   51.97    4.22
  -5  -5  15   56.32    9.87
  -5  -5  16  120.00    5.61
  -5  -5  16  123.85    6.06
  -5  -5  16  103.14   13.50
  -5  -5  17   49.45    3.91
  -5  -5  17   50.88    4.20
  -5  -5  18  124.11    5.83
  -5  -5  18  126.39    6.30
  -5  -5  19   14.93    2.52
  -5  -5  20    5.24    2.30
  -5  -5  20    3.24    1.96
  -5  -5  21   24.17    3.13
  -5  -5  21   27.71    3.13
   5  -5 -21   26.10    2.93
  -5  -5  22   16.13    2.65
   5  -5 -22   13.06    2.02
  -5  -5  22   17.11    2.56
  -5  -5  23   28.82    2.91
   5  -5 -23   23.82    2.26
  -5  -5  23   34.82    2.93
  -5  -5  23   31.67    2.87
  -5  -5  24   14.89    2.11
  -5  -5  24   11.93    1.80
  -5  -5  24   15.93    1.96
  -5  -5  25    1.85    1.02
  -5  -5  25    3.02    1.09
  -5  -5  25    2.89    1.22
  -5  -5  26    4.39    0.93
  -5  -5  26    3.09    0.80
  -5  -5  26    3.37    0.78
   5  -6  25   13.37    1.52
   5  -6  25    8.48    1.28
   5  -6  24   12.54    1.78
   5  -6  24   13.52    1.93
  -5  -6 -24   13.35    2.26
   5  -6  23    9.50    1.80
  -5  -6 -23    6.59    2.20
   5  -6  23    9.22    1.76
  -5   6  23   12.37    1.80
   5  -6  22   58.23    3.83
  -5  -6 -22   59.66    4.72
   5  -6  22   76.05    4.69
  -5   6  22   62.29    3.83
   5  -6  21   35.26    3.43
  -5  -6 -21   32.69    4.09
   5  -6  21   31.89    3.22
   5  -6  20   39.25    3.72
   5  -6  20   40.19    3.83
  -5  -6 -20   36.08    4.28
   5  -6  19   61.45    4.56
  -5  -6 -19   65.79    5.50
  -5  -6 -18   31.06    4.11
   5  -6  18   38.21    3.48
   5  -6  17  169.15    6.69
  -5  -6 -17  165.87    8.22
   5  -6  16  100.70    5.17
  -5  -6 -16  109.40    6.69
   5  -6  15  203.45    7.15
  -5  -6 -15  188.69    8.43
  -5   6  14  166.02   16.82
   5  -6  14  171.06    6.41
  -5  -6 -14  197.40    8.17
  -5   6  13  105.22   13.41
  -5  -6 -13  114.03    6.02
   5  -6  13  113.79    5.09
  -5  -6 -12  211.64   17.89
  -5  -6 -11   73.51   10.91
  -5  -6 -10  373.51   23.61
  -5  -6  -9   49.17    8.96
  -5  -6  -8   52.97    9.28
  -5  -6  -7    4.50    3.93
  -5  -6  -6   49.25    8.39
   5  -6   6   44.49    7.46
   5  -6   5  171.43   13.22
  -5  -6  -5  165.95   14.76
   5  -6   4   88.46    9.26
  -5  -6  -4  101.81   11.78
  -5  -6  -3   36.06    6.00
  -5  -6  -3   36.69    7.00
   5  -6   3   26.28    5.15
   5  -6   2  278.89   14.85
  -5  -6  -2  265.85   17.95
  -5  -6  -2  268.15   15.48
  -5  -6  -1  139.91   13.06
  -5  -6  -1  135.94   11.50
  -5  -6   0  124.79   11.39
  -5  -6   0  119.20   12.06
  -5  -6   1  134.94   12.93
  -5  -6   1  135.63   12.24
  -5  -6   2  256.53   17.54
  -5  -6   2  284.83   18.04
  -5  -6   3   33.45    7.06
  -5  -6   3   36.30    7.39
  -5  -6   4   99.33   11.87
  -5  -6   4  106.01   12.28
  -5  -6   5  175.78   15.67
  -5  -6   6   50.97    9.04
  -5  -6   7    4.09    3.87
  -5  -6   8   56.43   10.15
  -5  -6   9   47.01    9.13
  -5  -6  10  420.74   26.60
  -5  -6  11  101.29   13.35
  -5  -6  12  229.29   20.26
  -5  -6  13   86.18    4.52
  -5  -6  13  101.33   13.65
  -5  -6  14  163.61   17.19
  -5  -6  14  161.24    6.19
  -5  -6  14  165.52    6.63
  -5  -6  15  190.95    6.96
  -5  -6  15  179.78    7.04
  -5  -6  15  200.73   18.98
  -5  -6  16   96.51    5.35
  -5  -6  16   97.75    5.15
  -5  -6  17  163.08    6.93
  -5  -6  17  172.63    6.76
  -5  -6  18   34.26    3.46
  -5  -6  19   70.27    4.56
  -5  -6  20   30.67    3.41
  -5  -6  20   37.99    3.50
   5  -6 -20   30.89    3.48
  -5  -6  21   26.63    3.15
  -5  -6  21   25.84    2.87
  -5  -6  21   22.65    2.85
   5  -6 -21   24.34    2.80
  -5  -6  22   55.14    3.91
  -5  -6  22   58.80    3.70
   5  -6 -22   52.47    3.50
  -5  -6  22   66.03    4.00
  -5  -6  23    5.37    1.76
  -5  -6  23    8.15    1.63
  -5  -6  23    8.78    1.74
   5  -6 -23    5.13    1.41
  -5  -6  24   12.52    1.83
  -5  -6  24   11.06    1.50
  -5  -6  24   11.91    1.70
  -5  -6  25   11.13    1.43
  -5  -6  25   13.87    1.46
  -5  -6  25    6.43    1.00
  -5  -6  26    0.52    0.63
  -5  -6  26   -0.30    0.50
   5  -7  25    1.80    0.80
   5  -7  24   33.45    2.37
   5  -7  24   29.84    2.06
   5  -7  23    4.33    1.30
  -5  -7 -23    3.26    1.78
   5  -7  23    3.54    1.43
  -5   7  23    1.87    1.00
   5  -7  22   45.82    3.41
   5  -7  22   50.64    3.74
  -5   7  22   39.62    2.85
  -5  -7 -22   43.10    3.85
  -5  -7 -21   89.75    5.59
   5  -7  21  104.07    5.00
  -5   7  21   83.23    4.28
   5  -7  20    2.96    1.70
  -5  -7 -20    2.33    2.52
   5  -7  20    2.06    1.91
   5  -7  19   19.26    2.85
   5  -7  19   13.52    2.35
  -5  -7 -19   15.80    3.13
  -5  -7 -18   19.21    3.43
   5  -7  18   15.74    2.65
   5  -7  17  147.78    6.33
  -5  -7 -17  161.21    7.93
   5  -7  16  160.37    6.43
  -5  -7 -16  155.61    7.72
  -5  -7 -15    5.80    2.72
   5  -7  15    1.52    1.56
  -5   7  14   36.78    8.76
   5  -7  14   29.73    3.00
  -5  -7 -14   35.86    3.98
   5  -7  14   23.61    7.35
   5  -7  13  463.43   30.13
  -5   7  13  425.43   27.28
   5  -7  13  414.22    9.85
  -5  -7 -13  375.99   25.69
  -5  -7 -13  440.82   11.87
   5  -7  12  215.38   20.02
  -5  -7 -12  185.01    7.50
   5  -7  11   73.86   11.69
  -5  -7 -11   70.29   11.69
   5  -7  10   86.05   12.17
  -5  -7 -10   78.27   12.02
   5  -7   9  410.55   25.10
  -5  -7  -9  390.96   25.34
   5  -7   8  175.30   15.95
  -5  -7  -8  177.45   17.17
   5  -7   7   11.11    4.74
  -5  -7  -7    6.48    4.00
   5  -7   6   11.89    5.22
  -5  -7  -6    8.74    5.17
   5  -7   5   59.27    8.63
  -5  -7  -5   46.62    8.61
   5  -7   4  143.96   12.54
  -5  -7  -4  140.70   14.39
  -5  -7  -3  207.53   17.30
   5  -7   3  218.99   14.72
  -5  -7  -2   12.67    5.30
  -5  -7  -2   16.85    5.02
  -5  -7  -1  197.86   16.41
  -5  -7  -1  218.29   15.78
  -5  -7   0   63.03    9.69
  -5  -7   0   62.99    8.82
  -5  -7   1  222.75   17.26
  -5  -7   1  219.51   16.21
  -5  -7   2   20.58    5.96
  -5  -7   2   15.32    5.54
  -5  -7   3  202.23   16.56
  -5  -7   3  208.77   16.98
  -5  -7   4  113.87   12.78
  -5  -7   4  122.05   13.15
  -5  -7   5   60.27   10.04
  -5  -7   6   10.09    4.63
  -5  -7   7    6.33    4.09
  -5  -7   8  177.58   17.32
  -5  -7   9  425.76   27.08
  -5  -7  10   64.73   11.04
  -5  -7  11   74.25   12.28
  -5  -7  12  206.56   19.45
  -5  -7  12  210.86    6.56
  -5  -7  13  395.20    9.26
  -5  -7  13  417.85   27.54
  -5  -7  14   37.99    3.22
  -5  -7  14   37.67    8.76
  -5  -7  15    2.85    1.61
  -5  -7  16  153.28    6.33
  -5  -7  16  158.89    6.56
  -5  -7  17  152.61    6.30
  -5  -7  17  168.37    6.74
  -5  -7  18   19.00    3.13
  -5  -7  18   20.17    2.63
   5  -7 -18   17.82    3.24
   5  -7 -19   10.39    2.70
  -5  -7  19    9.41    2.11
  -5  -7  19   16.21    2.89
  -5  -7  20    1.76    1.74
   5  -7 -20    4.28    2.15
  -5  -7  20    2.46    1.74
  -5  -7  20    1.22    1.41
  -5  -7  21   85.62    4.72
   5  -7 -21   81.05    4.43
  -5  -7  21   99.90    5.00
  -5  -7  21   87.27    4.28
  -5  -7  22   41.82    3.24
   5  -7 -22   39.80    3.00
  -5  -7  22   44.12    3.22
  -5  -7  22   47.23    3.02
  -5  -7  23    2.98    1.50
  -5  -7  23    3.02    1.13
  -5  -7  23    0.48    1.13
   5  -7 -23    1.93    1.17
  -5  -7  24   24.00    1.96
   5  -7 -24    1.17    0.59
  -5  -7  24   21.63    1.96
  -5  -7  25    1.59    0.74
  -5  -7  25    1.30    0.78
   5  -8  24   46.30    2.43
   5  -8  23   51.17    2.35
  -5   8  23   49.88    2.54
   5  -8  22   20.17    2.00
   5  -8  22   19.37    2.28
  -5  -8 -22   15.22    2.41
  -5   8  22   13.17    1.76
   5  -8  21   17.56    2.02
  -5  -8 -21   12.82    2.48
  -5   8  21   14.06    2.06
   5  -8  20    4.20    1.41
  -5  -8 -20    3.41    2.09
  -5   8  20    5.65    1.83
   5  -8  19   18.84    2.74
   5  -8  19   17.54    2.20
  -5  -8 -19   20.13    3.15
   5  -8  18  125.78    5.37
   5  -8  18  145.96    6.17
  -5  -8 -18  127.63    6.78
   5  -8  17   63.21    4.22
  -5  -8 -17   59.60    4.91
   5  -8  16   24.82    2.80
  -5  -8 -16   23.61    3.46
   5  -8  15  148.93    6.24
  -5  -8 -15  172.84    7.91
  -5  -8 -14  216.18    7.52
   5  -8  14  209.49    7.26
  -5  -8 -14  202.23    8.39
  -5  -8 -13   24.13    2.91
   5  -8  13   22.37    2.59
   5  -8  13   22.78    7.69
   5  -8  13   22.47    2.91
  -5  -8 -13   23.08    3.15
   5  -8  12    8.61    5.46
  -5  -8 -12    5.61    2.15
   5  -8  12    5.52    1.59
   5  -8  12    7.04    1.87
  -5  -8 -12   11.85    5.91
  -5  -8 -12    5.22    1.96
  -5  -8 -11   15.41    2.41
   5  -8  11   15.15    5.96
   5  -8  11   16.17    2.39
  -5  -8 -11    7.74    4.65
  -5  -8 -11    7.52    1.67
  -5  -8 -10   23.71    2.76
   5  -8  10   23.78    2.61
   5  -8  10   19.84    6.59
  -5  -8 -10   19.39    6.78
   5  -8   9   33.26    8.00
  -5  -8  -9   24.21    8.02
   5  -8   8   77.64   11.24
  -5  -8  -8   61.73   10.87
  -5  -8  -7   83.70   12.65
   5  -8   7   76.55   10.65
  -5  -8  -6   95.96   12.95
   5  -8   6   98.25   11.89
   5  -8   5   50.19    8.19
  -5  -8  -5   55.03    9.65
  -5  -8  -4  129.18   14.67
   5  -8   4  144.41   13.35
  -5  -8  -3    3.74    4.20
  -5  -8  -2  241.85   19.54
  -5  -8  -1   80.88   10.63
  -5  -8  -1   88.62   11.95
  -5  -8   0 1525.81   44.91
  -5  -8   0 1518.22   47.10
  -5  -8   1   75.64   10.89
  -5  -8   1   75.66   10.72
  -5  -8   2  234.22   18.56
  -5  -8   2  230.86   18.06
  -5  -8   3    6.24    4.33
  -5  -8   3    2.48    3.41
  -5  -8   4  138.94   14.82
  -5  -8   4  143.35   14.82
  -5  -8   5   51.06    9.56
  -5  -8   6   82.62   11.78
  -5  -8   7   58.49   10.26
  -5  -8   8   72.60   11.72
  -5  -8   9   34.39    8.74
  -5  -8  10   24.28    2.54
  -5  -8  10   19.13    2.56
  -5  -8  10   15.56    6.00
  -5  -8  11   14.52    2.11
  -5  -8  11    7.74    1.87
  -5  -8  11    9.48    4.50
  -5  -8  12    1.11    1.46
  -5  -8  12    0.52    3.67
  -5  -8  13   23.15    3.00
  -5  -8  13   26.52    7.63
  -5  -8  13   27.02    2.67
  -5  -8  14  198.69    6.74
  -5  -8  14  195.54    7.74
  -5  -8  15  148.13    5.98
  -5  -8  15  135.76    6.63
   5  -8 -16   17.71    3.35
  -5  -8  16   20.13    3.00
   5  -8 -17   72.68    5.39
  -5  -8  17   70.36    4.91
   5  -8 -18  118.81    6.33
  -5  -8  18  122.94    6.00
  -5  -8  19   15.11    2.52
   5  -8 -19   17.02    2.78
  -5  -8  19   19.43    2.91
  -5  -8  20    6.00    1.98
   5  -8 -20    4.30    1.89
  -5  -8  20    9.46    2.61
  -5  -8  21   19.37    2.48
   5  -8 -21   11.89    2.13
  -5  -8  22   18.00    2.13
   5  -8 -22   14.63    2.00
  -5  -8  22   16.58    2.09
   5  -8 -23   44.04    2.52
  -5  -8  23   60.30    3.00
  -5  -8  23   54.93    2.89
  -5  -8  24   32.56    1.91
  -5  -8  24   24.89    1.72
   5  -9  24   12.35    1.09
   5  -9  23   11.63    1.37
  -5   9  23    3.33    0.87
   5  -9  22    6.85    1.46
  -5   9  22    2.26    1.07
   5  -9  21   11.61    1.89
  -5   9  21    8.37    1.61
  -5  -9 -20   63.12    4.28
  -5   9  20   71.38    4.13
   5  -9  19   59.40    3.17
   5  -9  19   64.42    4.06
  -5  -9 -19   55.30    4.20
  -5   9  19   56.10    3.96
   5  -9  18   58.14    3.89
  -5  -9 -18   59.43    4.54
  -5   9  18   54.45    4.13
  -5  -9 -17    0.89    1.96
   5  -9  17    3.89    1.78
  -5  -9 -16  103.38    5.15
   5  -9  16   95.96    4.87
  -5  -9 -16   99.38    5.93
  -5  -9 -15   33.76    3.39
   5  -9  15   35.30    3.24
  -5  -9 -15   40.10    4.00
  -5  -9 -14  169.67    6.91
   5  -9  14  147.24    6.04
  -5  -9 -14  154.82    7.13
  -5  -9 -13   13.39    3.00
   5  -9  13   10.48    2.06
   5  -9  13   10.87    2.37
  -5  -9 -13   13.32    2.43
  -5  -9 -12   74.14    4.93
   5  -9  12   71.10    4.22
   5  -9  12   75.68    4.78
  -5  -9 -12   79.64    4.98
  -5  -9 -11    5.74    2.13
  -5  -9 -11    3.98    2.02
   5  -9  11    5.17    1.63
   5  -9  11   -0.78    3.46
   5  -9  11    4.46    1.74
  -5  -9 -11   -2.41    3.98
   5  -9  10   91.07   13.04
  -5  -9 -10  104.85    5.72
   5  -9  10  100.51    5.30
  -5  -9  -9   48.12    3.96
   5  -9   9   51.30    3.74
   5  -9   9   49.43    3.59
   5  -9   9   41.82    3.65
  -5  -9  -9   37.71    8.96
   5  -9   9   40.36    8.50
  -5  -9  -8   27.69    3.06
   5  -9   8   33.32    8.15
   5  -9   8   28.84    2.78
   5  -9   8   27.00    2.89
   5  -9   8   33.21    3.06
  -5  -9  -8   22.71    7.13
  -5   9   8   32.28    3.28
  -5  -9  -7  155.93    6.52
   5  -9   7  160.67   16.11
  -5  -9  -7  146.78   17.28
   5  -9   7  157.78    6.35
  -5   9   7  154.95    6.50
  -5  -9  -6   70.12   12.22
  -5  -9  -5   -4.04    4.74
  -5  -9  -4  116.96   15.13
  -5  -9  -3  192.25   18.80
  -5  -9  -2  101.27   13.65
  -5  -9  -1  261.98   21.00
  -5  -9   0   30.28    7.59
  -5  -9   1  285.91   21.02
  -5  -9   1  254.96   20.37
  -5  -9   2   96.05   12.61
  -5  -9   2   84.66   11.95
  -5  -9   3  203.51   18.48
  -5  -9   3  179.45   17.13
  -5  -9   4  114.29   13.93
  -5  -9   4  122.61   14.22
  -5  -9   5    3.65    4.26
  -5  -9   6   94.05   13.15
  -5  -9   7  136.04   16.06
  -5  -9   8   27.87    2.80
  -5  -9   8   35.36    9.00
  -5  -9   8   24.30    2.70
  -5  -9   9   44.93    3.56
  -5  -9   9   44.36    3.52
  -5  -9   9   38.25    8.96
  -5  -9  10  110.74    5.26
  -5  -9  10  113.16    5.24
  -5  -9  10  108.53    5.43
  -5  -9  10  102.92   14.63
  -5  -9  11    6.78    1.83
  -5  -9  11    4.28    1.74
  -5  -9  11    2.85    3.89
   5  -9 -12   69.14    5.15
  -5  -9  12   73.40    4.69
   5  -9 -13   15.30    2.96
  -5  -9  13   11.45    2.30
  -5  -9  14  126.52    6.17
   5  -9 -14  137.26    6.98
   5  -9 -15   37.43    4.00
  -5  -9  15   31.63    3.37
   5  -9 -16   88.46    5.76
  -5  -9  16   84.90    5.19
   5  -9 -17    3.35    2.33
  -5  -9  17    1.80    1.87
  -5  -9  18   55.21    3.87
  -5  -9  18   54.08    4.04
   5  -9 -18   61.21    4.54
  -5  -9  19   54.43    3.59
   5  -9 -19   53.75    3.98
  -5  -9  19   53.34    3.87
   5  -9 -20   68.32    4.09
  -5  -9  20   74.51    4.04
  -5  -9  21    8.65    1.67
  -5  -9  21   14.00    1.93
   5  -9 -21    9.61    1.89
  -5  -9  22    7.41    1.48
   5  -9 -22    5.61    1.33
  -5  -9  23    4.17    0.96
   5  -9 -23    3.11    0.80
  -5  -9  24   14.37    1.15
   5 -10  22   14.26    1.48
  -5  10  22    9.02    1.26
   5 -10  21   46.54    2.78
  -5  10  21   34.82    2.50
   5 -10  20    7.65    1.59
  -5  10  20    7.96    1.74
   5 -10  19   35.32    2.80
  -5  10  19   28.54    2.83
   5 -10  18   31.58    2.76
  -5  10  18   33.65    3.28
  -5 -10 -17   17.02    2.15
  -5 -10 -17   14.08    2.48
   5 -10  17   16.58    2.28
  -5  10  17   15.19    2.74
  -5 -10 -16   22.32    2.76
  -5  10  16   26.26    3.26
   5 -10  16   23.63    2.67
  -5 -10 -16   26.26    3.06
  -5 -10 -15   29.28    3.22
  -5  10  15   31.52    3.52
  -5 -10 -15   30.73    3.41
   5 -10  15   29.91    2.91
  -5 -10 -14    3.50    1.96
   5 -10  14    3.17    1.74
  -5 -10 -14    1.02    1.74
  -5  10  14    1.78    1.78
  -5 -10 -13   33.13    3.61
  -5 -10 -13   34.78    3.48
   5 -10  13   34.89    3.09
  -5  10  13   35.19    3.70
   5 -10  13   33.95    3.50
  -5 -10 -12   19.98    3.11
  -5 -10 -12   14.72    2.54
   5 -10  12   19.04    2.48
   5 -10  12   15.50    2.63
  -5  10  12   16.15    2.74
  -5 -10 -11   54.84    4.52
   5 -10  11   50.58    3.56
   5 -10  11   59.23    4.28
  -5  10  11   52.43    4.37
   5 -10  10   26.93    2.65
   5 -10  10   29.21    3.15
  -5  10  10   28.10    3.33
  -5 -10 -10   25.19    3.17
  -5 -10  -9   76.34    5.30
   5 -10   9   76.25    4.69
  -5  10   9   76.88    5.06
  -5 -10  -8    5.00    3.65
   5 -10   8    8.93    2.06
   5 -10   8    6.65    1.91
  -5 -10  -8    9.59    2.46
  -5  10   8    7.17    2.09
  -5 -10  -7   86.38    5.28
   5 -10   7   75.44    4.22
   5 -10   7   81.64    4.67
   5 -10   7   86.29    5.04
  -5  10   7   79.99    4.98
  -5 -10  -6   97.98    5.54
   5 -10   6  104.40    5.26
   5 -10   6   90.03    5.00
  -5 -10  -6   87.90   13.65
   5 -10   6   99.44    4.56
  -5  10   6  101.16    5.37
  -5 -10  -5  123.26    6.00
  -5 -10  -5  115.40   15.43
   5 -10   5  116.48    5.46
   5 -10   5  110.50    5.46
  -5  10   5  110.33    5.46
  -5 -10  -4   30.26    3.09
   5 -10   4   35.36    3.09
  -5  10   4   34.82    3.15
   5 -10   4   30.82    2.96
  -5 -10  -4   33.28    8.91
  -5 -10  -3   83.60    4.98
  -5 -10  -3   83.23   13.08
   5 -10   3   85.44    4.67
  -5  10   3   88.88    4.67
  -5 -10  -2   63.16    4.22
  -5 -10  -2   60.32   11.11
   5 -10   2   60.27    3.98
  -5 -10  -1   97.22    5.06
  -5 -10  -1  101.51   13.95
   5 -10   1  100.92    5.02
  -5 -10   0  127.26   15.56
  -5 -10   1   85.73   12.11
  -5 -10   2   63.64    4.22
  -5 -10   2   53.27    9.69
  -5 -10   3   93.70    5.15
  -5 -10   3   88.31   12.85
  -5 -10   4   29.45    3.06
  -5 -10   4   29.30    2.56
  -5 -10   4   32.60    8.56
  -5 -10   4   34.17    8.54
   5 -10  -4   30.45    7.26
  -5 -10   5   98.14   13.89
  -5 -10   5   93.12    5.22
  -5 -10   5   89.94    4.48
   5 -10  -5  100.11    4.83
  -5 -10   6   99.53   14.04
  -5 -10   6   90.51    5.15
   5 -10  -6   96.22    4.93
  -5 -10   7   94.29   14.39
  -5 -10   7   75.75    4.80
  -5 -10   7   91.49    4.72
   5 -10  -7   82.34    4.83
  -5 -10   8    6.74    2.00
   5 -10  -8    5.85    1.91
  -5 -10   8    3.30    4.87
  -5 -10   8    7.85    1.91
  -5 -10   8    6.43    1.61
  -5 -10   9   82.60   13.26
  -5 -10   9   77.68    4.80
  -5 -10   9   74.60    4.33
  -5 -10   9   82.40    4.67
   5 -10  -9   76.12    4.91
  -5 -10  10   24.76    2.83
  -5 -10  10   22.65    2.78
  -5 -10  10   25.41    2.78
   5 -10 -10   27.52    3.24
   5 -10 -11   56.51    4.50
  -5 -10  11   60.75    4.15
  -5 -10  11   54.75    4.06
  -5 -10  11   54.45    3.87
   5 -10 -12   17.74    3.09
  -5 -10  12   18.95    2.67
   5 -10 -13   29.58    3.63
  -5 -10  13   30.50    3.26
   5 -10 -14    3.09    2.06
  -5 -10  14    0.63    1.61
   5 -10 -15   31.41    3.65
  -5 -10  15   28.00    3.04
  -5 -10  16   21.41    2.43
   5 -10 -16   25.21    3.30
  -5 -10  16   20.65    2.78
  -5 -10  17   14.28    2.15
   5 -10 -17   20.61    3.09
  -5 -10  17   22.11    2.67
  -5 -10  18   25.21    2.46
   5 -10 -18   32.63    3.33
  -5 -10  18   29.54    2.89
  -5 -10  19   23.30    2.24
  -5 -10  19   34.32    2.85
   5 -10 -19   34.99    3.20
  -5 -10  20    5.02    1.30
   5 -10 -20    4.72    1.67
  -5 -10  20    5.22    1.43
   5 -10 -21   34.73    2.56
  -5 -10  21   35.62    2.33
  -5 -10  21   26.06    1.91
  -5 -10  22    4.72    0.78
   5 -10 -22    9.61    1.33
   5 -11  21   30.19    1.80
  -5  11  21   28.43    1.93
   5 -11  20    9.72    1.37
  -5  11  20   11.45    1.65
   5 -11  19   19.52    1.91
  -5  11  19   18.24    2.15
   5 -11  18    4.20    1.43
  -5  11  18    4.67    1.70
   5 -11  17   27.45    2.43
  -5 -11 -17   27.30    2.50
  -5  11  17   30.47    3.11
  -5 -11 -16   43.19    3.46
   5 -11  16   45.60    3.11
  -5  11  16   46.62    3.87
  -5 -11 -15   65.08    4.41
   5 -11  15   69.36    3.80
  -5  11  15   67.58    4.65
  -5 -11 -14   61.08    4.48
   5 -11  14   54.95    3.50
  -5  11  14   61.38    4.56
   5 -11  13   12.15    2.43
   5 -11  13   11.80    2.00
  -5 -11 -13   11.76    2.63
  -5  11  13   10.50    2.50
   5 -11  12    9.13    1.83
   5 -11  12    9.35    2.22
  -5 -11 -12   11.76    2.67
  -5  11  12   10.15    2.30
  -5 -11 -11  200.86    8.19
   5 -11  11  184.97    6.39
   5 -11  11  208.95    7.87
  -5  11  11  189.86    7.91
  -5 -11 -10  134.81    6.85
   5 -11  10  137.30    5.43
   5 -11  10  144.15    6.54
  -5  11  10  139.48    6.80
  -5 -11  -9   49.21    4.39
   5 -11   9   53.88    3.50
   5 -11   9   44.80    3.76
  -5  11   9   48.06    4.09
   5 -11   8   25.56    2.54
  -5 -11  -8   23.06    3.22
   5 -11   8   32.86    3.37
   5 -11   8   24.67    3.09
  -5  11   8   25.04    3.09
  -5 -11  -7   48.78    4.22
  -5  11   7   42.28    3.76
   5 -11   7   46.28    3.96
   5 -11   7   40.88    3.63
  -5 -11  -6  164.34    7.41
   5 -11   6  164.58    6.80
   5 -11   6  159.26    6.85
  -5  11   6  159.63    6.93
   5 -11   5    3.22    1.74
  -5 -11  -5    0.76    1.80
  -5 -11  -5    2.28    4.30
   5 -11   5    0.89    1.39
  -5  11   5    1.07    1.41
  -5 -11  -4   67.95    4.87
   5 -11   4   69.53    4.52
  -5  11   4   67.36    4.30
   5 -11   4   65.34    4.37
  -5 -11  -4   64.06   11.95
   5 -11   3   22.00    2.78
  -5 -11  -3   12.17    6.65
   5 -11   3   22.47    2.72
  -5  11   3   20.06    2.50
  -5 -11  -3   17.11    2.63
  -5 -11  -2  168.00    7.19
  -5 -11  -2  179.45   19.21
   5 -11   2  178.82    7.04
   5 -11   2  170.84    6.87
  -5  11   2  172.28    6.63
  -5 -11  -1   36.41    2.85
  -5 -11  -1   33.28    3.41
   5 -11   1   30.71    3.02
  -5  11   1   38.34    3.22
  -5 -11   0   54.17    3.43
  -5 -11   0   46.73    3.98
  -5  11   0   44.34    3.30
   5 -11   0   46.30    3.70
  -5 -11   1   28.91    3.22
  -5 -11   1   25.10    2.98
  -5 -11   1   25.28    2.46
  -5 -11   1   23.54    7.19
  -5  11  -1   26.24    2.54
   5 -11  -1   24.47    2.85
  -5 -11   2  176.49    7.24
  -5 -11   2  181.56    6.17
  -5 -11   3   25.52    3.17
  -5 -11   3   29.47    2.59
  -5 -11   3   24.34    7.02
  -5 -11   4   64.58    4.67
  -5 -11   4   69.53    4.00
   5 -11  -5    1.11    1.24
  -5 -11   5    2.63    1.61
  -5 -11   6  141.57    6.65
  -5 -11   6  142.52    5.69
   5 -11  -6  155.11    6.39
  -5 -11   7   41.93    3.85
  -5 -11   7   47.67    3.50
   5 -11  -7   43.93    3.70
  -5 -11   7   38.52    3.13
  -5 -11   8   32.36    3.46
  -5 -11   8   30.73    2.98
   5 -11  -8   31.69    3.24
  -5 -11   8   34.47    3.17
  -5 -11   9   45.58    3.98
  -5 -11   9   43.91    3.52
   5 -11  -9   43.62    3.87
  -5 -11   9   48.06    3.67
  -5 -11  10  135.11    6.24
   5 -11 -10  133.72    6.52
  -5 -11  10  138.35    5.96
  -5 -11  10  125.07    5.76
   5 -11 -11  200.43    8.00
  -5 -11  11  186.95    6.93
   5 -11 -12   15.11    2.87
  -5 -11  12   17.41    2.54
   5 -11 -13   10.19    2.52
  -5 -11  13   11.59    2.22
   5 -11 -14   62.53    4.61
  -5 -11  14   52.25    3.85
   5 -11 -15   68.95    4.85
  -5 -11  15   64.23    4.04
   5 -11 -16   41.08    3.83
  -5 -11  16   38.91    3.15
  -5 -11  17   24.65    2.15
   5 -11 -17   32.52    3.35
  -5 -11  17   30.78    2.72
  -5 -11  18    2.13    0.98
  -5 -11  18    2.78    1.30
   5 -11 -18    3.06    1.89
   5 -11 -19   20.50    2.33
  -5 -11  19   27.47    2.20
  -5 -11  20   10.00    1.33
   5 -11 -20    9.09    1.65
   5 -11 -21   23.97    1.89
  -5 -11  21   23.06    1.52
  -5  12  20    6.46    1.11
   5 -12  19   10.65    1.22
  -5  12  19   12.02    1.56
  -5  12  18   27.06    2.46
   5 -12  18   24.74    1.85
  -5 -12 -17    7.63    1.52
   5 -12  17    6.61    1.15
[truncated: 429,783 more chars]
