# Supplementary material
Source: MDPI journal article supplement (https://www.mdpi.com/2624-8549/3/3/52)
Supplement: s1 [file s1 › supplement.pdf]

Supplementary Materials:

# Unprecedented ansa-chain conformation of a novel Rifamycin derivative prepared employing the Alder-Ene reaction: Crystal structure and absolute stereochemistry.<sup>†</sup>

Christopher S. Frampton<sup>1,\*</sup>, James H. Gall<sup>2</sup> and David D. MacNicol<sup>2\*</sup>

<sup>1</sup> Experimental Techniques Centre, Brunel University London, Kingston Road, Uxbridge, Middlesex UB8 3PH, U.K.; [chris.frampton@brunel.ac.uk](mailto:chris.frampton@brunel.ac.uk)

<sup>2</sup> School of Chemistry, University of Glasgow, G12 8QQ, U.K.; [david.macnicol@glasgow.ac.uk](mailto:david.macnicol@glasgow.ac.uk)

\* Correspondence: [chris.frampton@brunel.ac.uk](mailto:chris.frampton@brunel.ac.uk); Tel.: +44-7841-373969 (C.S.F.)

<sup>†</sup> Dedicated to Dr. Howard Flack (1943-2017)

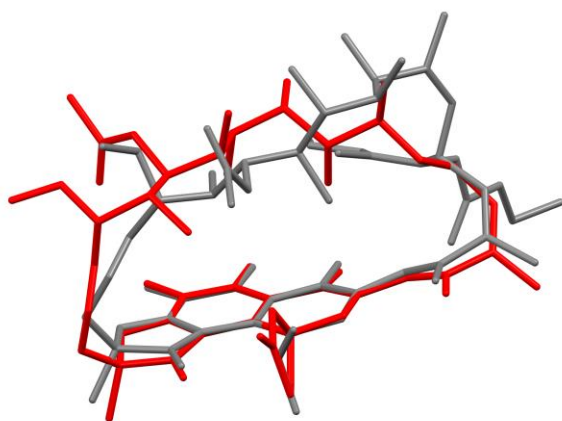

Figure S1: Structure overlay for Compound 3 and Rifamycin O, 1.

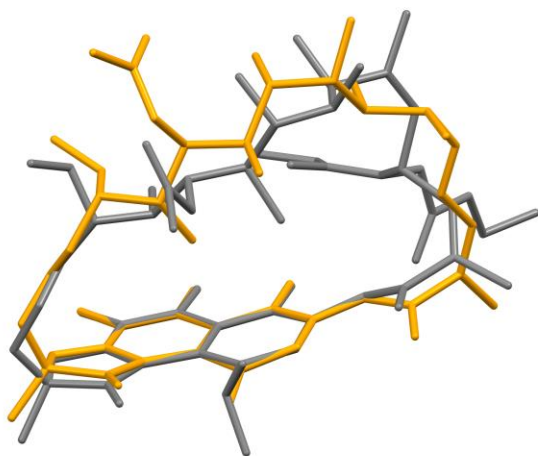

Figure S2: Structure overlay for Compound 3 and Rifamycin S, 4.
